# Supplementary material for: Synthesis, telomerase inhibitory and anticancer activity of new 2-phenyl-4H-chromone derivatives containing 1,3,4-oxadiazole moiety
Source: PubMed Central journal article supplement (PMC7782168; doi:10.1080/14756366.2020.1864630), 2020-12-27

**Synthesis, telomerase inhibitory and anticancer activity of new  
2-phenyl-4H-chromone derivatives containing 1,3,4-oxadiazole moiety**

**Content**

|                                                                                                              |                 |
|--------------------------------------------------------------------------------------------------------------|-----------------|
| <b>1. The spectrum of <sup>1</sup>H NMR, <sup>13</sup>C NMR and HRMS of compounds A1-A33 and B1-B33.....</b> | <b>S1-S96</b>   |
| <b>2. Fitting plot of compounds A2, A5, A16, A20, A27, A33, B27 and B33 for telomerase activity.....</b>     | <b>S97-S100</b> |

# 1. The spectrum of $^1\text{H}$ NMR, $^{13}\text{C}$ NMR and HRMS of compounds A1-A33 and B1-B33

## A1

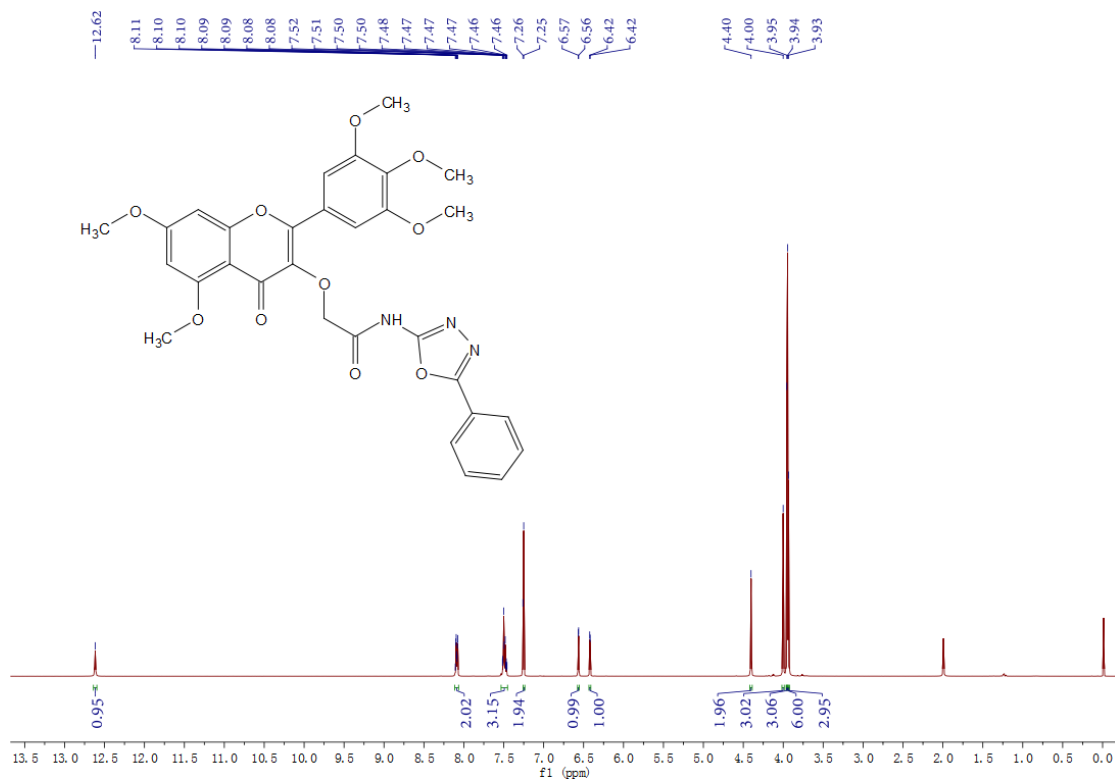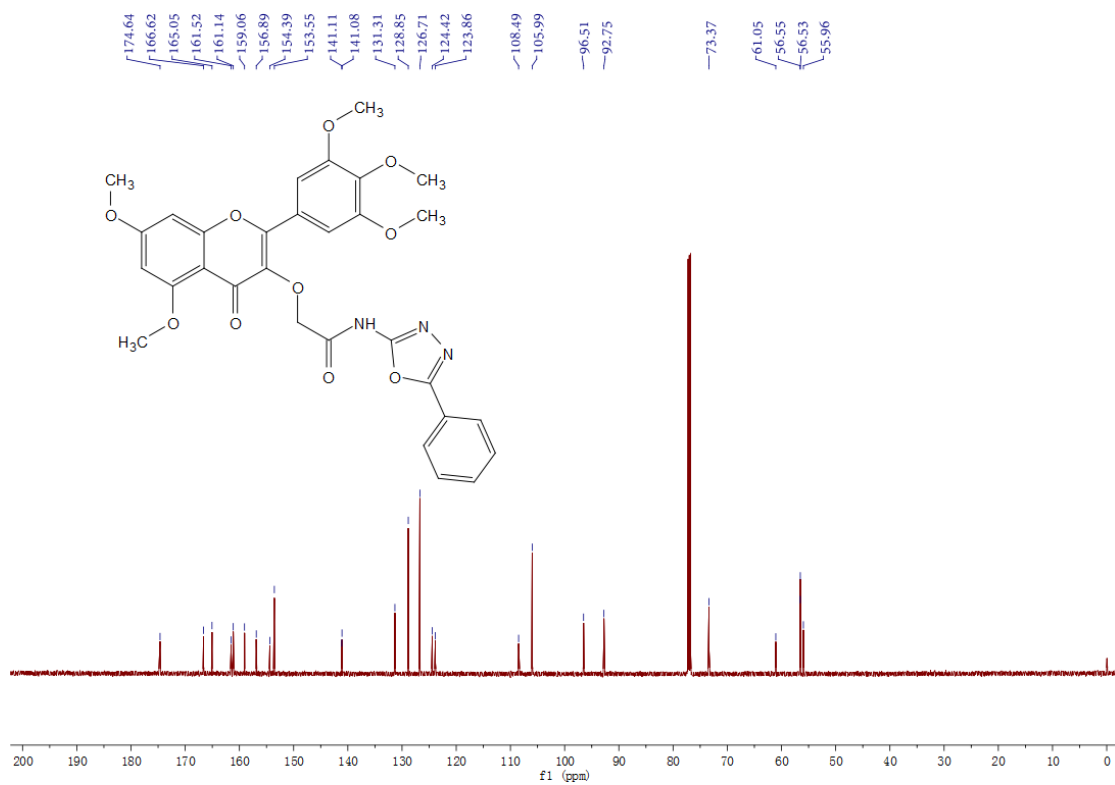

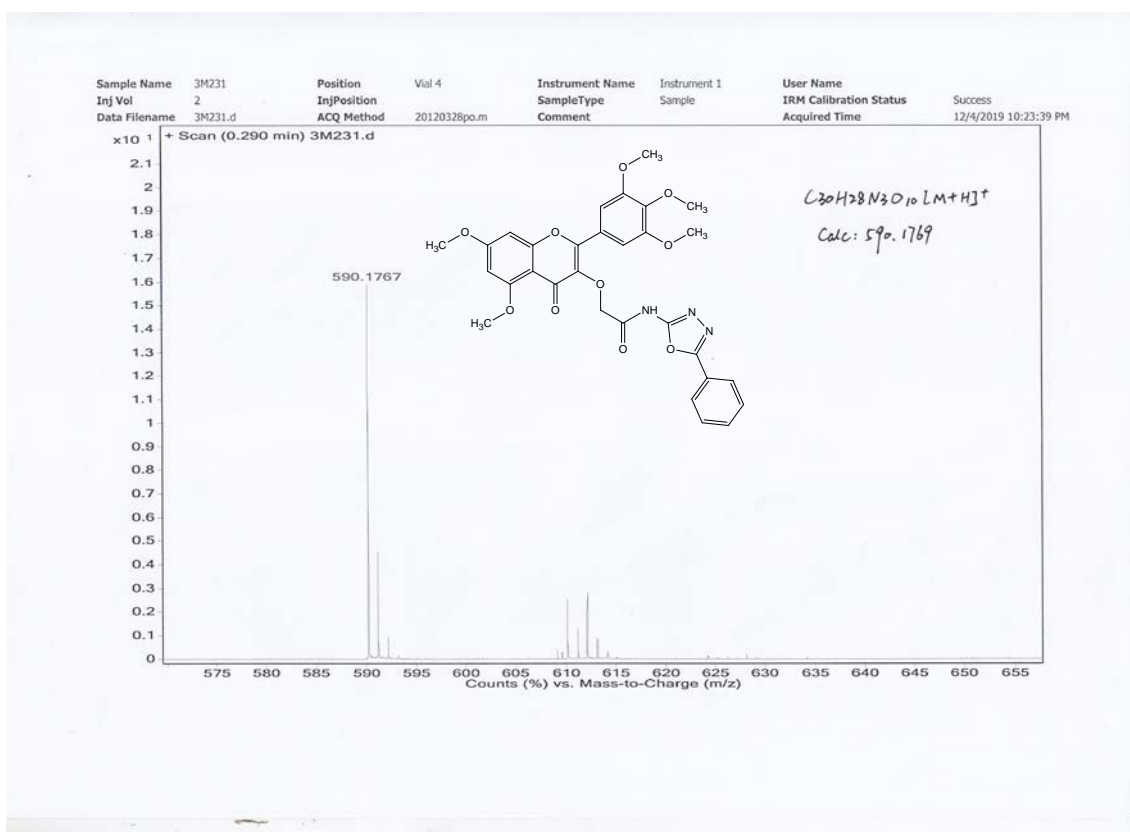

The spectrum of  $^1H$  NMR,  $^{13}C$  NMR and HRMS of compound A1

A2

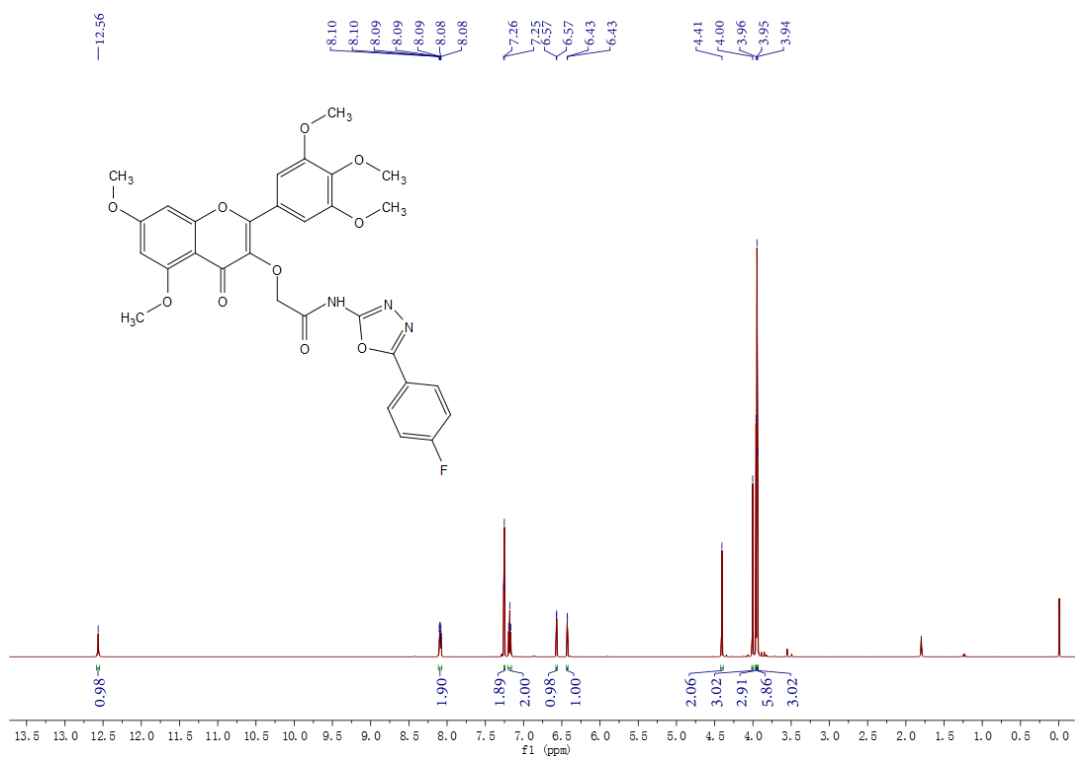

S2

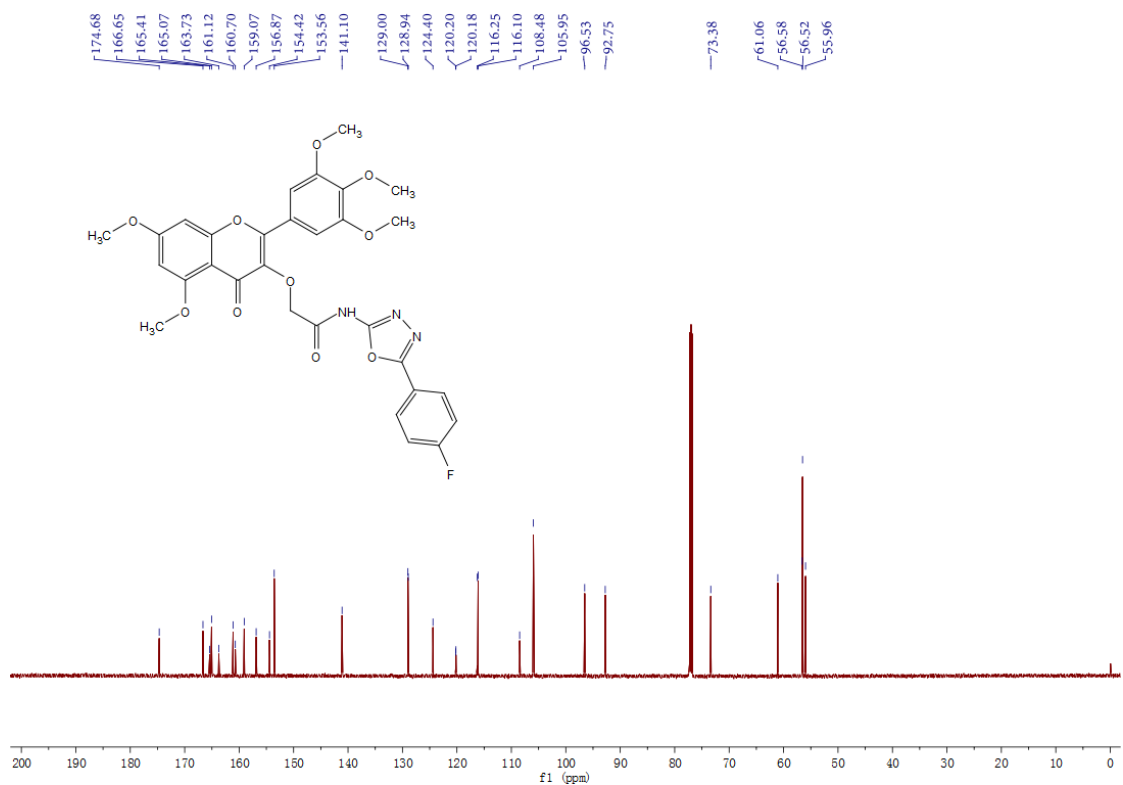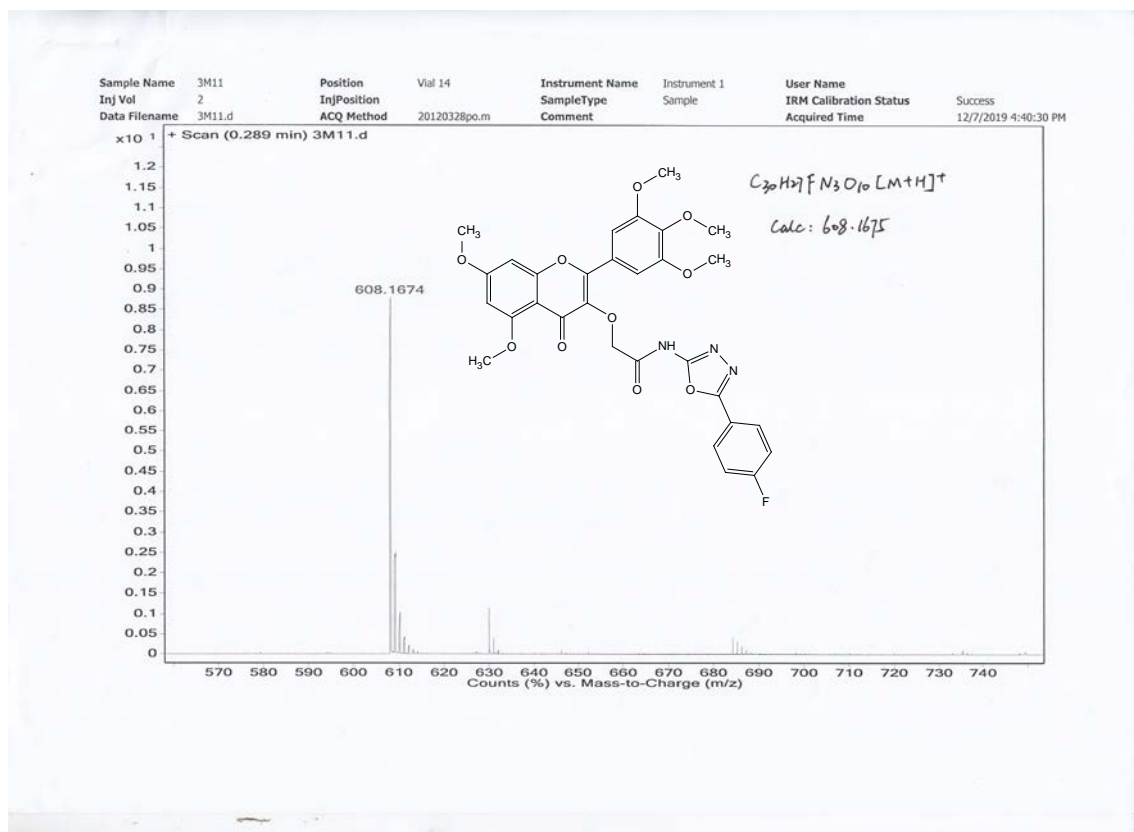

The spectrum of  $^1H$  NMR,  $^{13}C$  NMR and HRMS of compound A2



A3

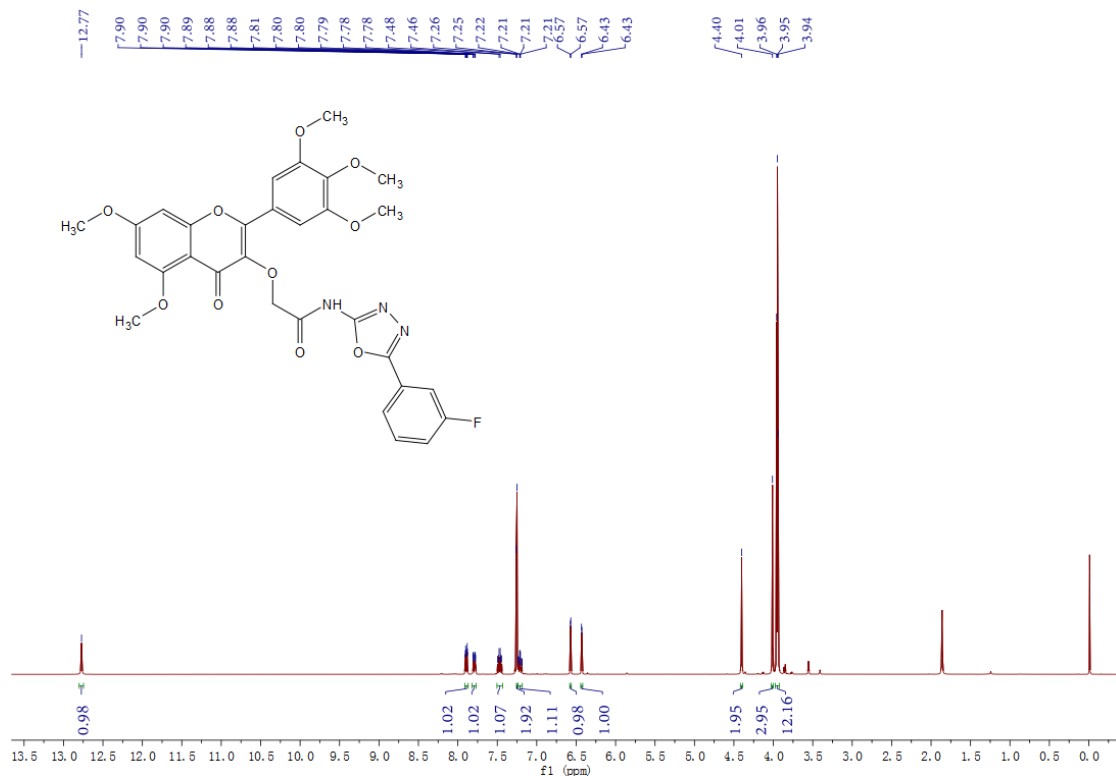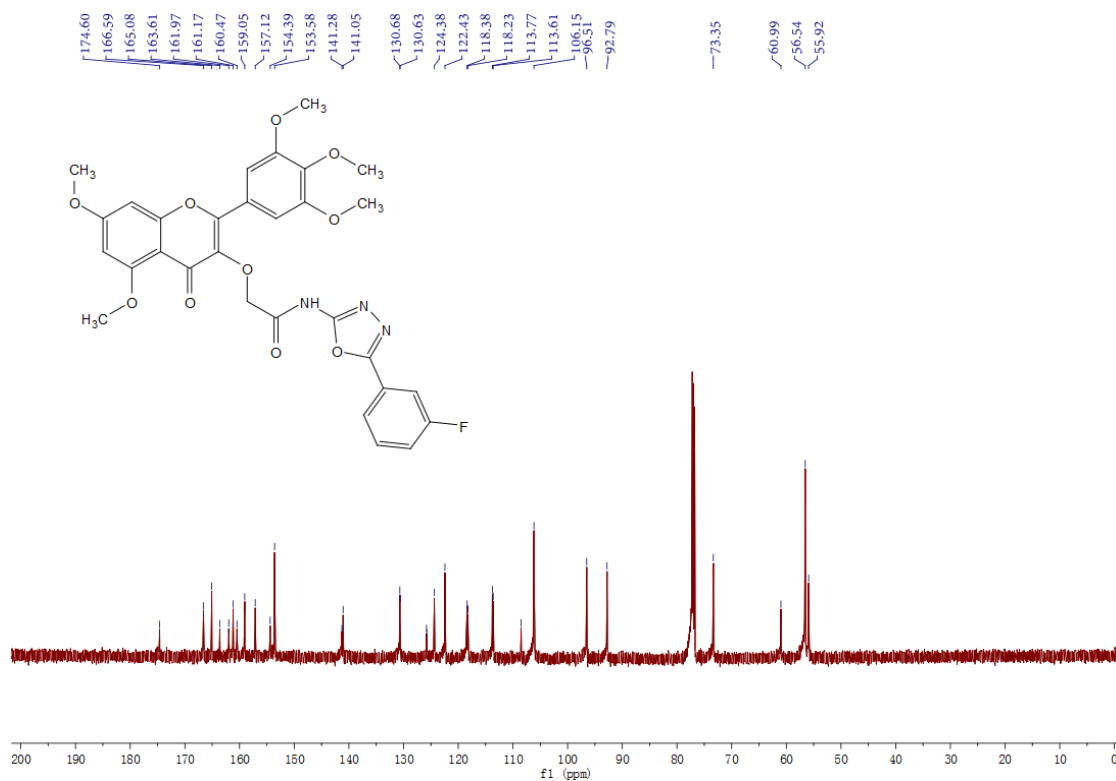

S4

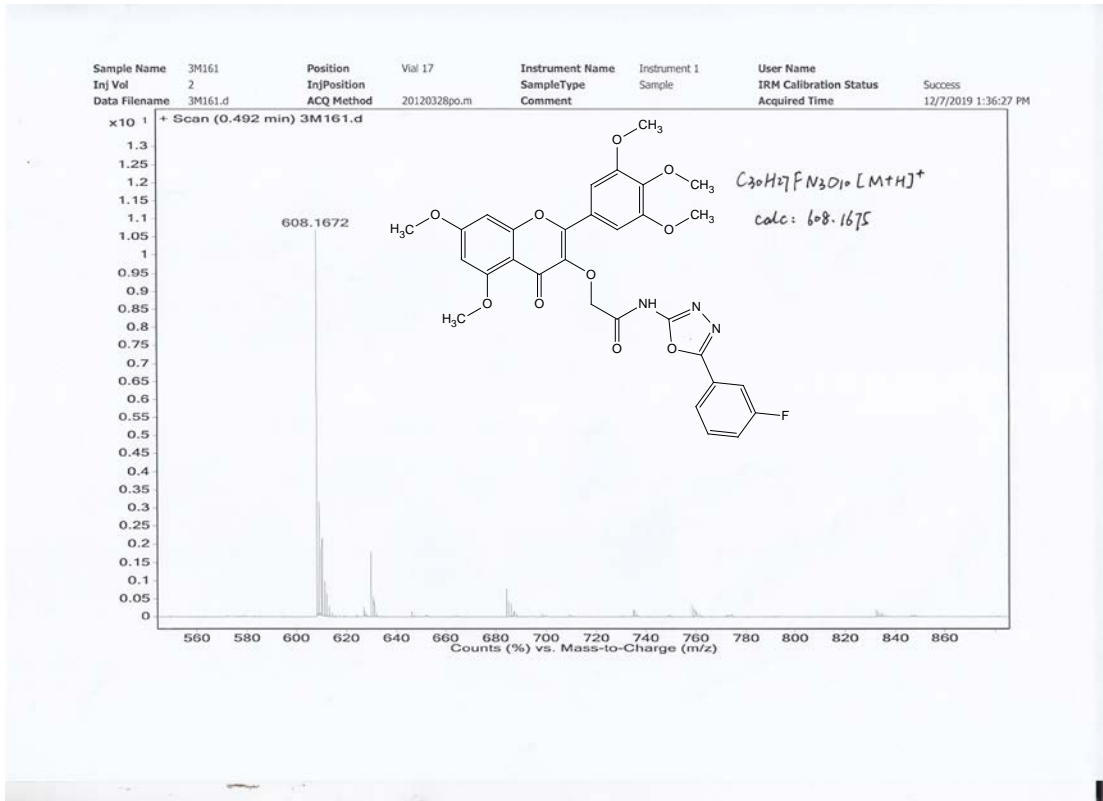

The spectrum of  $^1H$  NMR,  $^{13}C$  NMR and HRMS of compound A3

A4

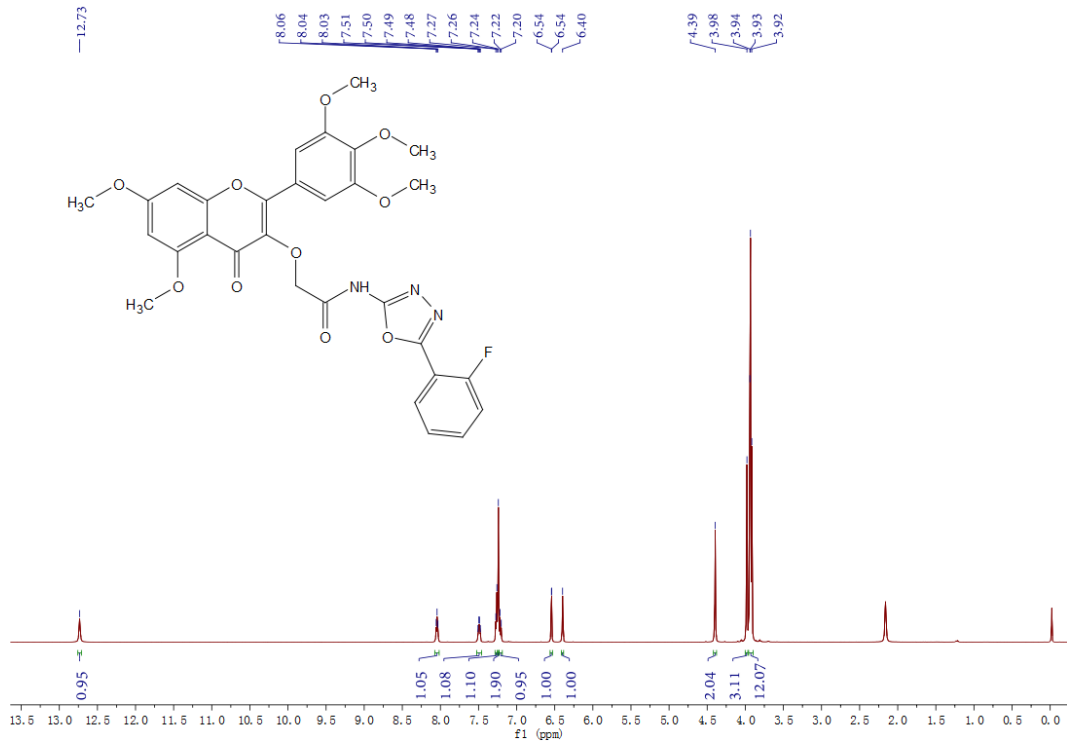

S5

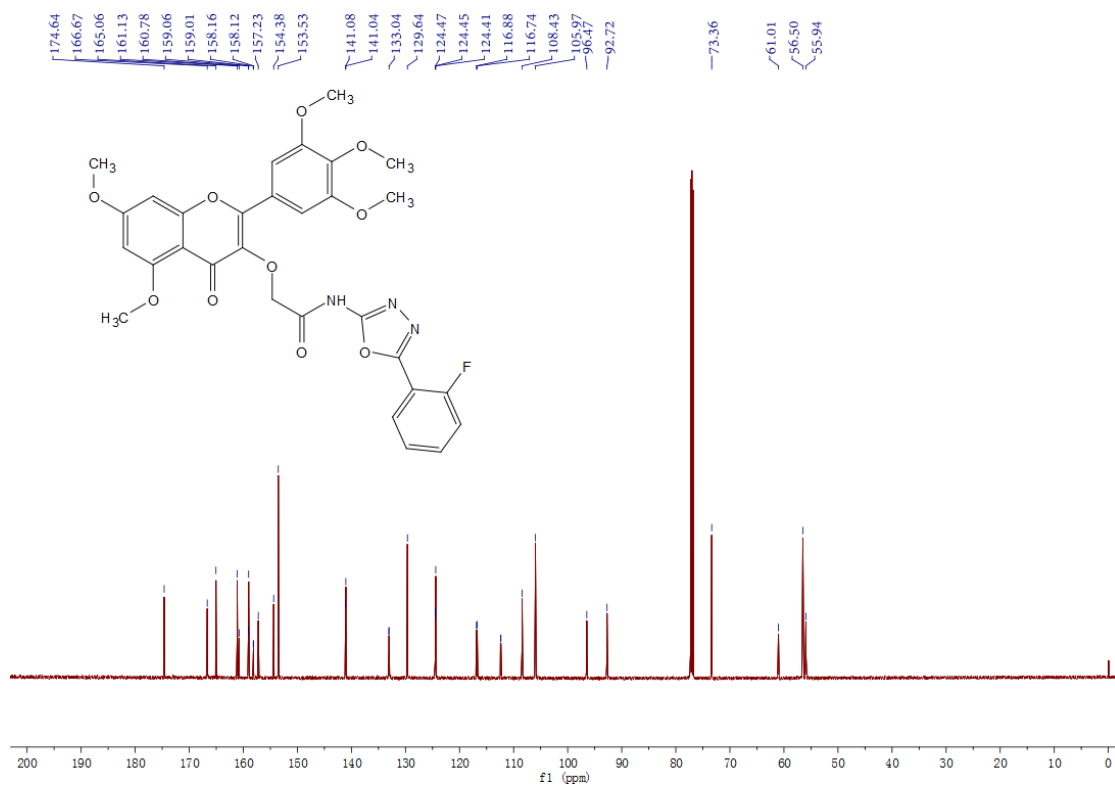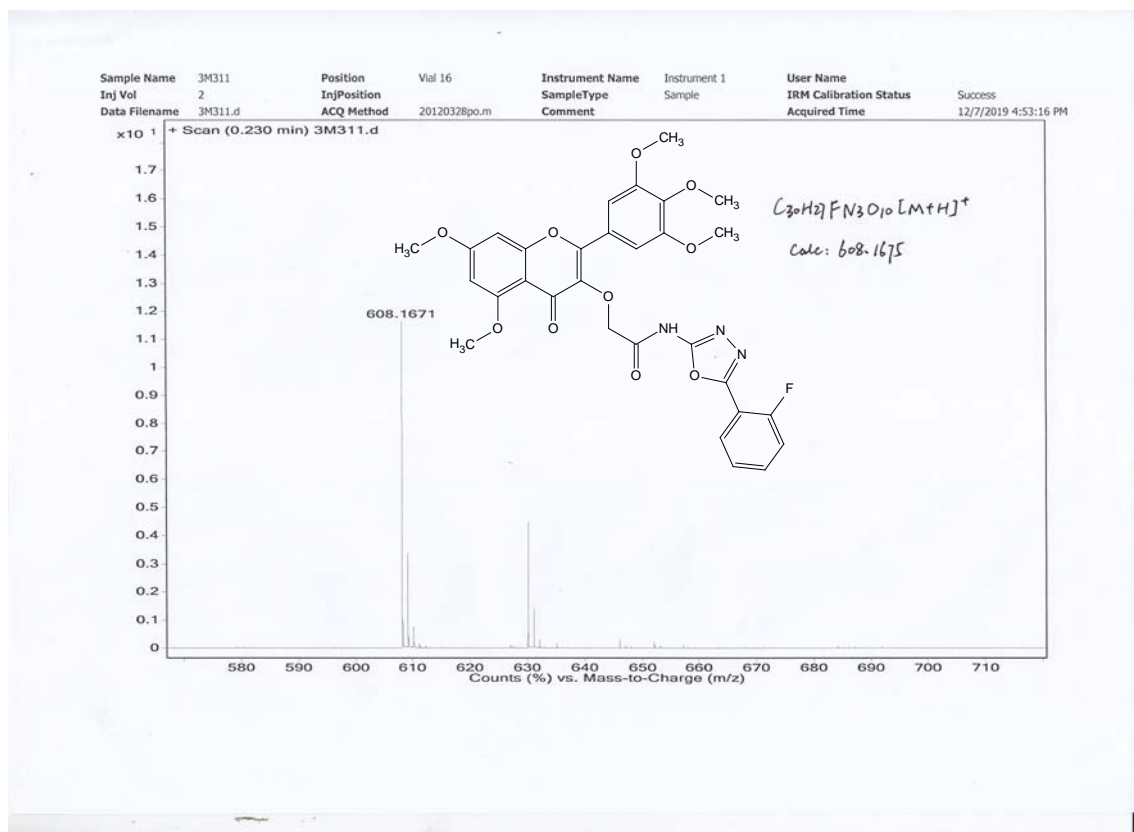

The spectrum of  $^1H$  NMR,  $^{13}C$  NMR and HRMS of compound A4

A5

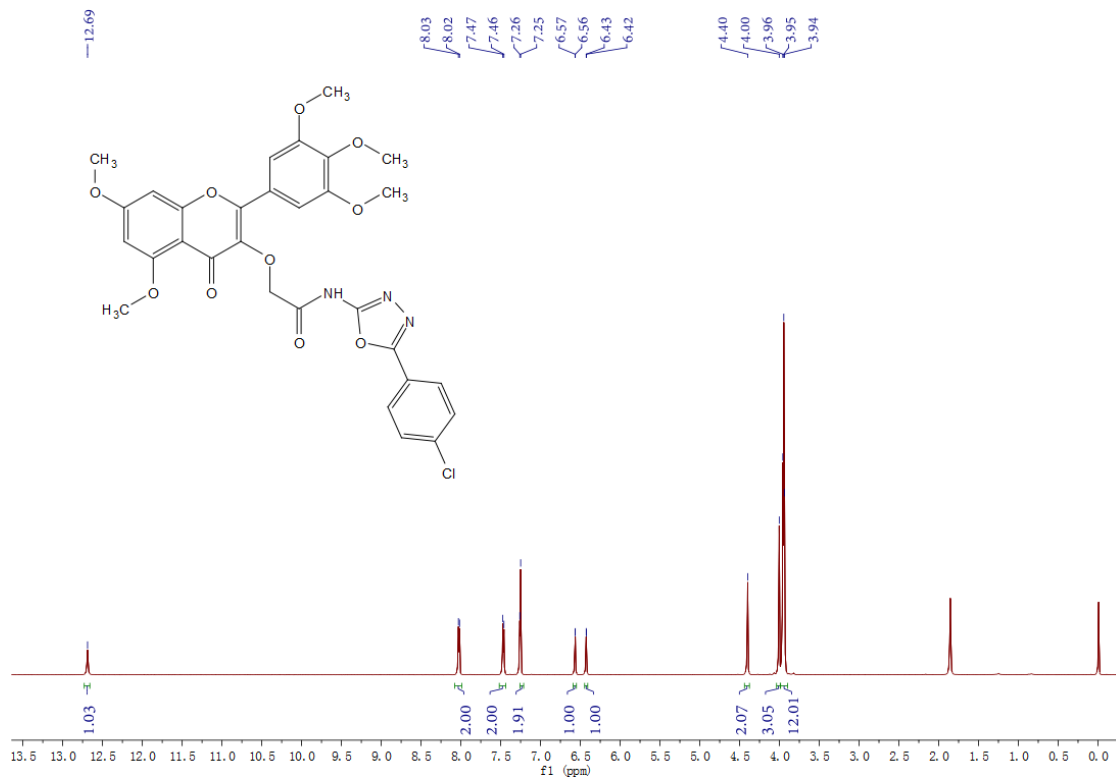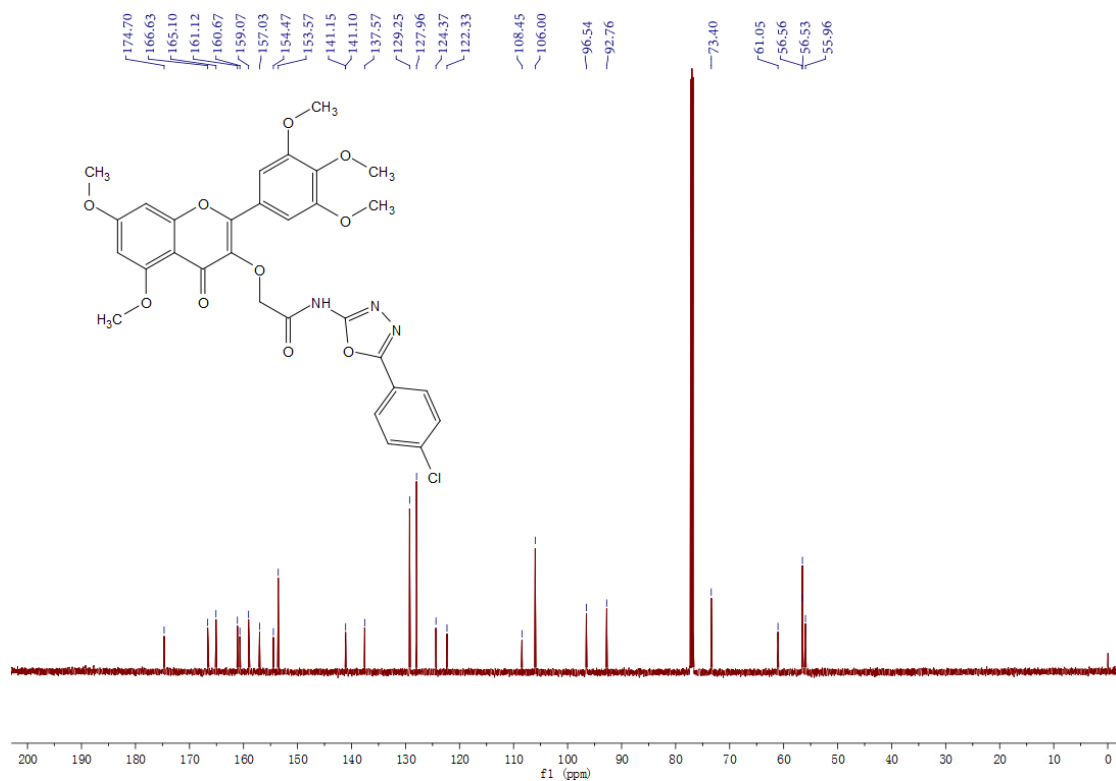

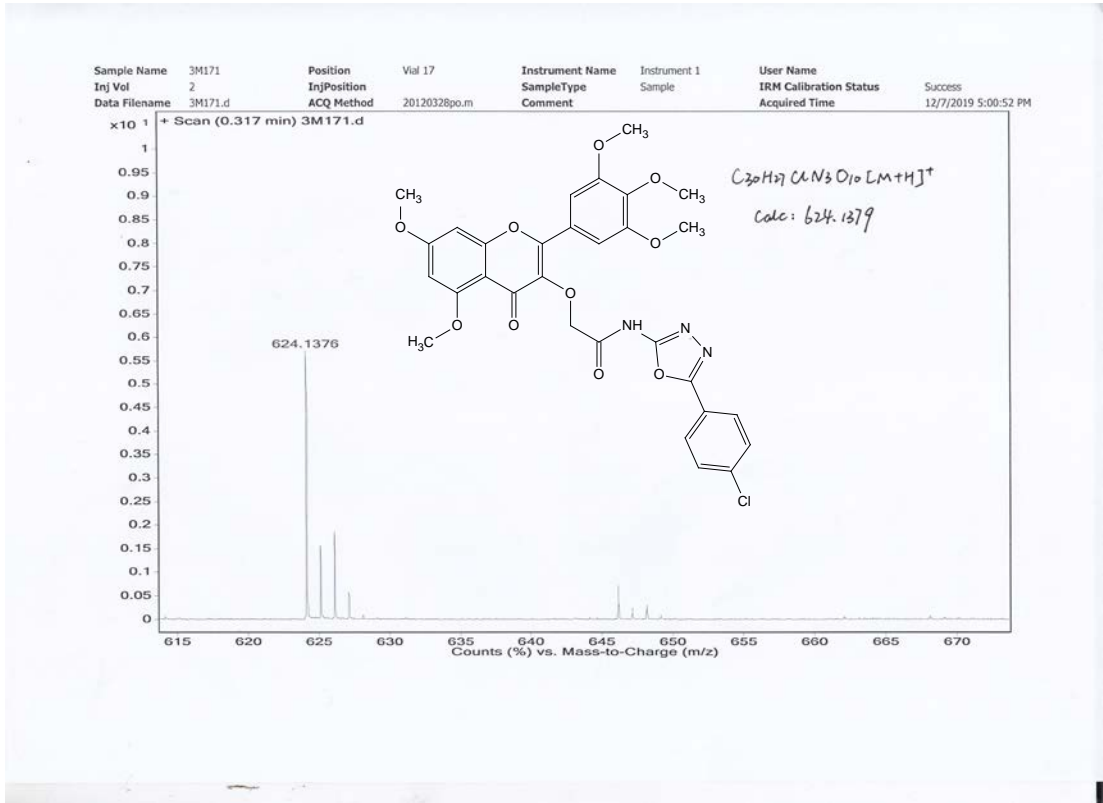

The spectrum of  $^1H$  NMR,  $^{13}C$  NMR and HRMS of compound A5

A6

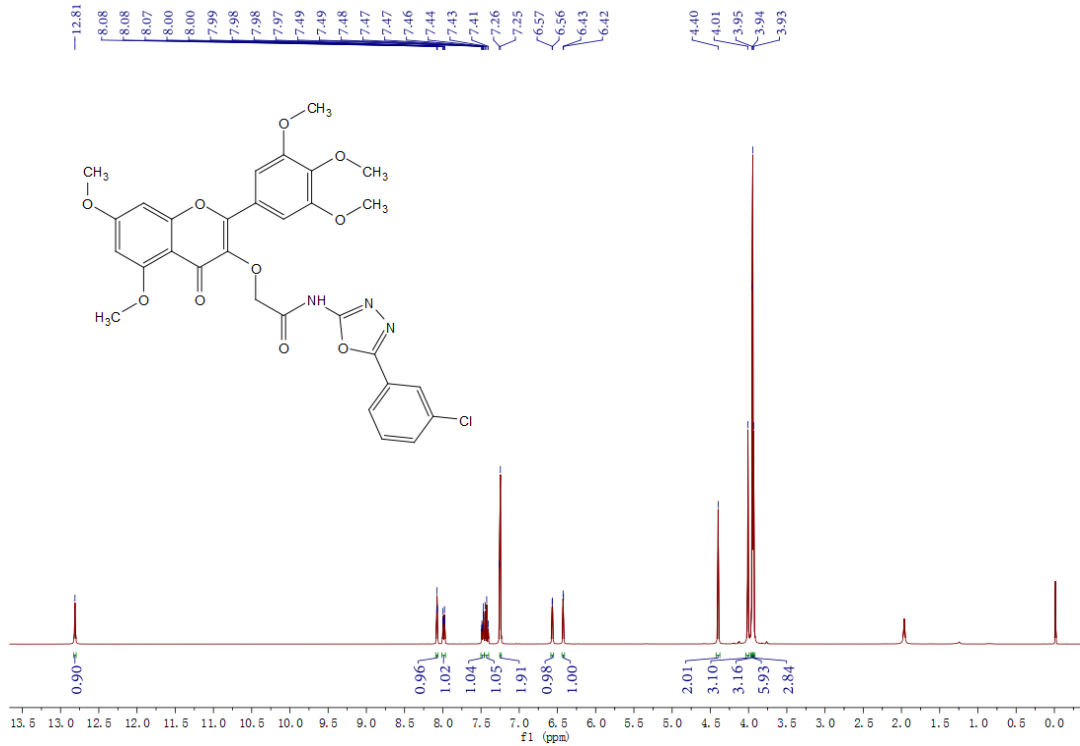

S8

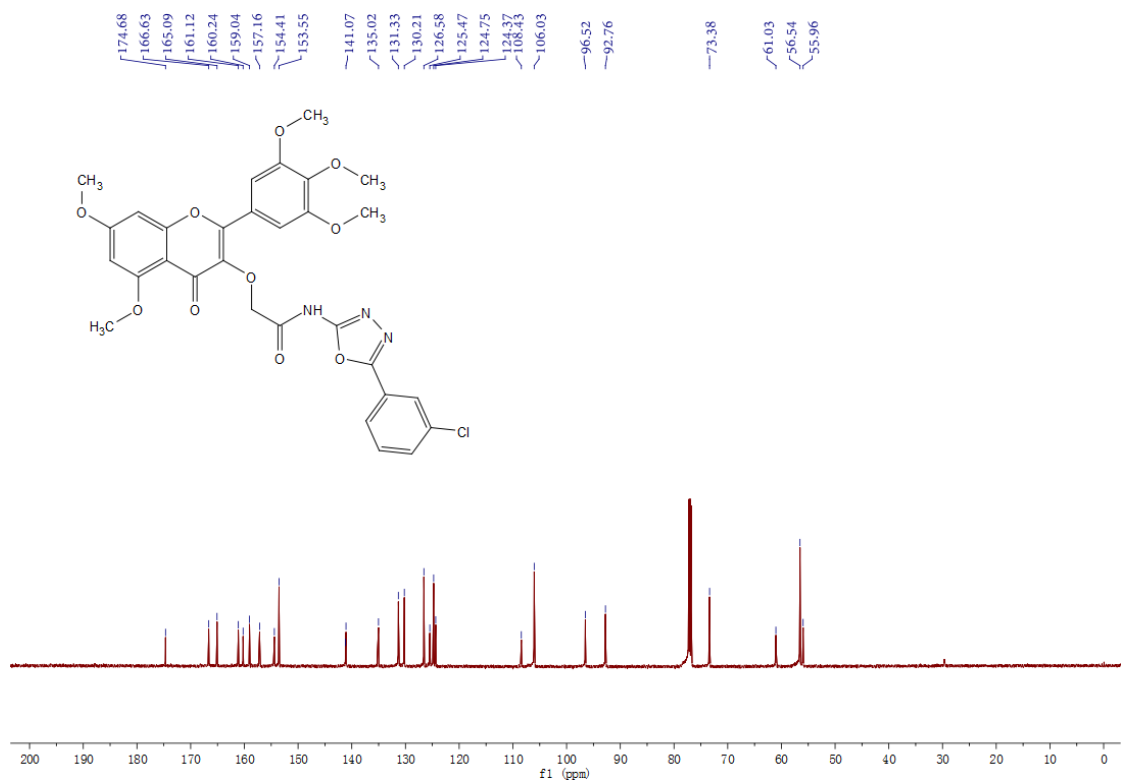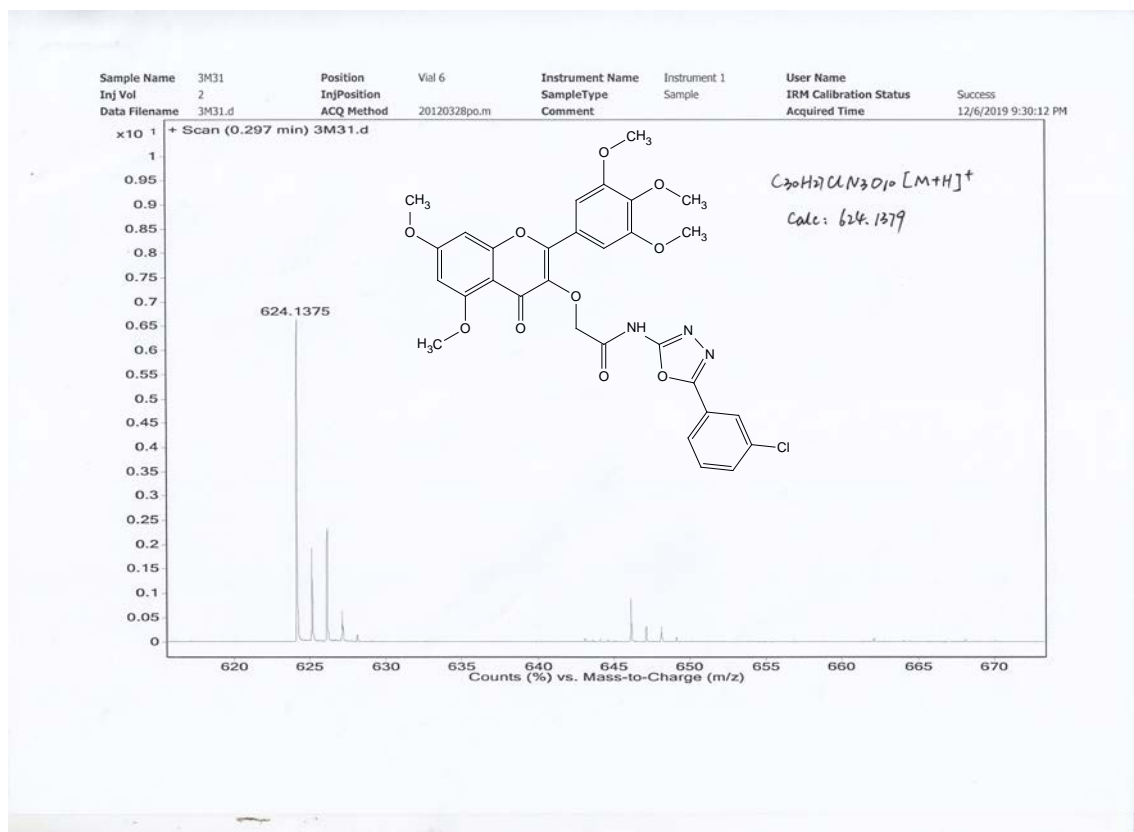

The spectrum of  $^1\text{H}$  NMR,  $^{13}\text{C}$  NMR and HRMS of compound A6

A7

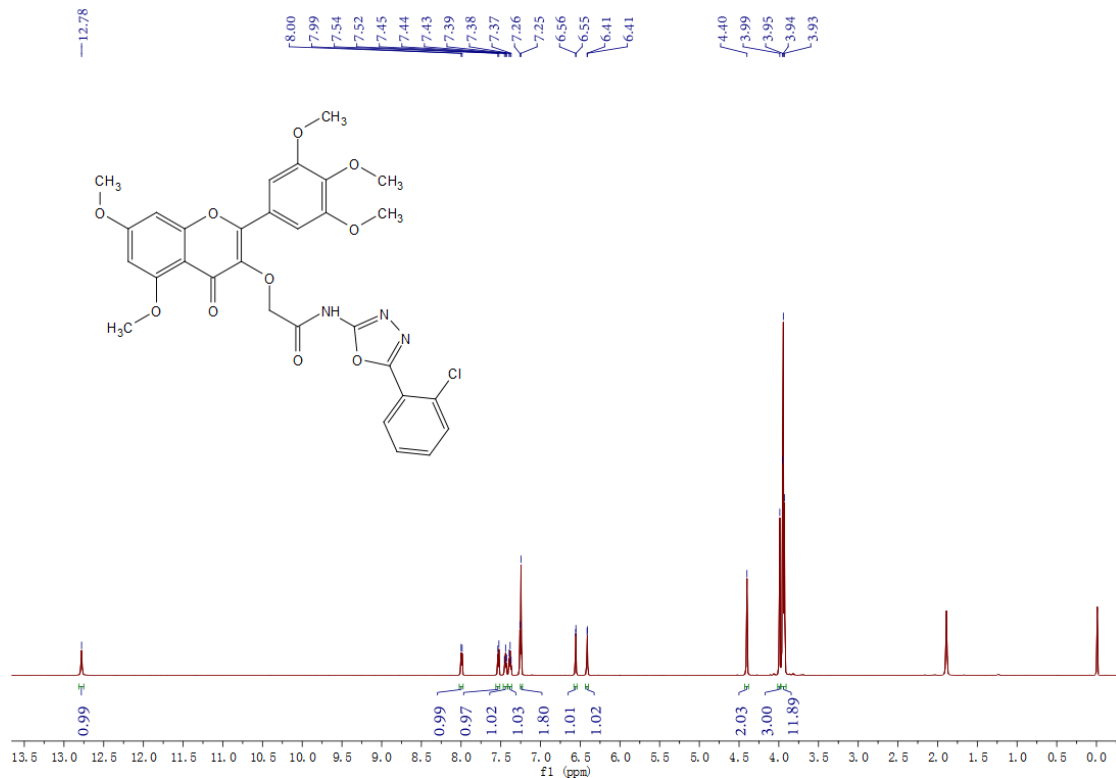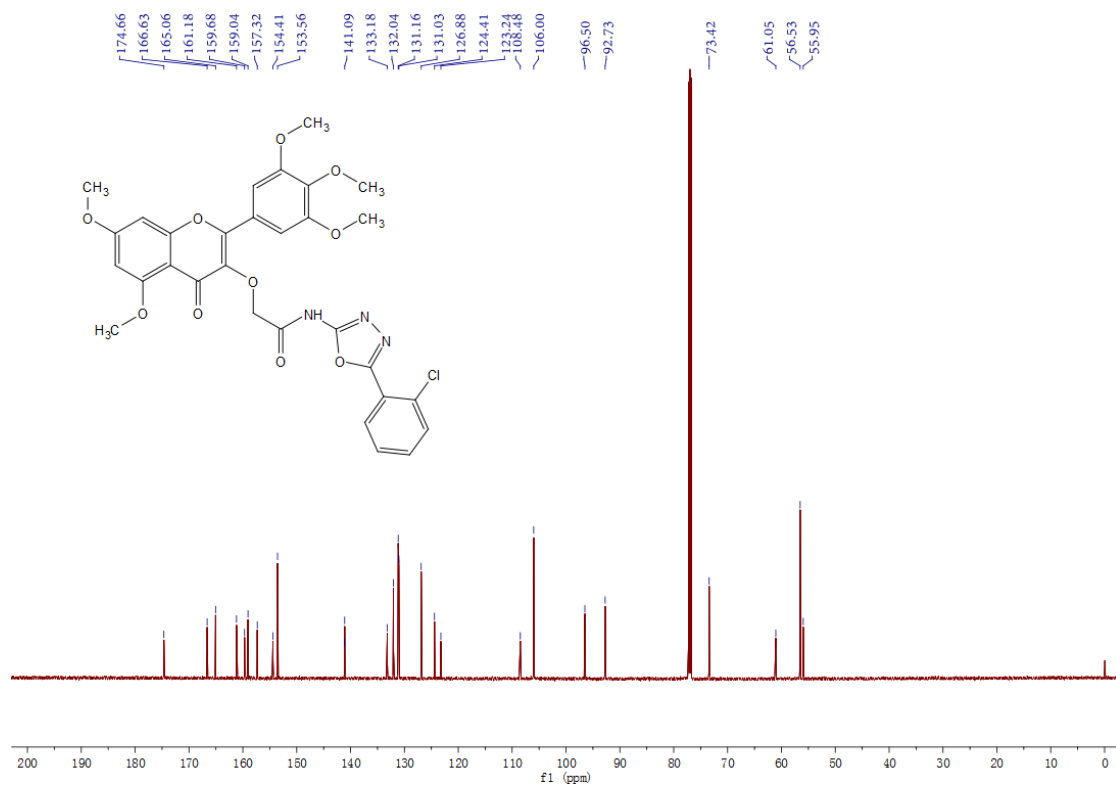

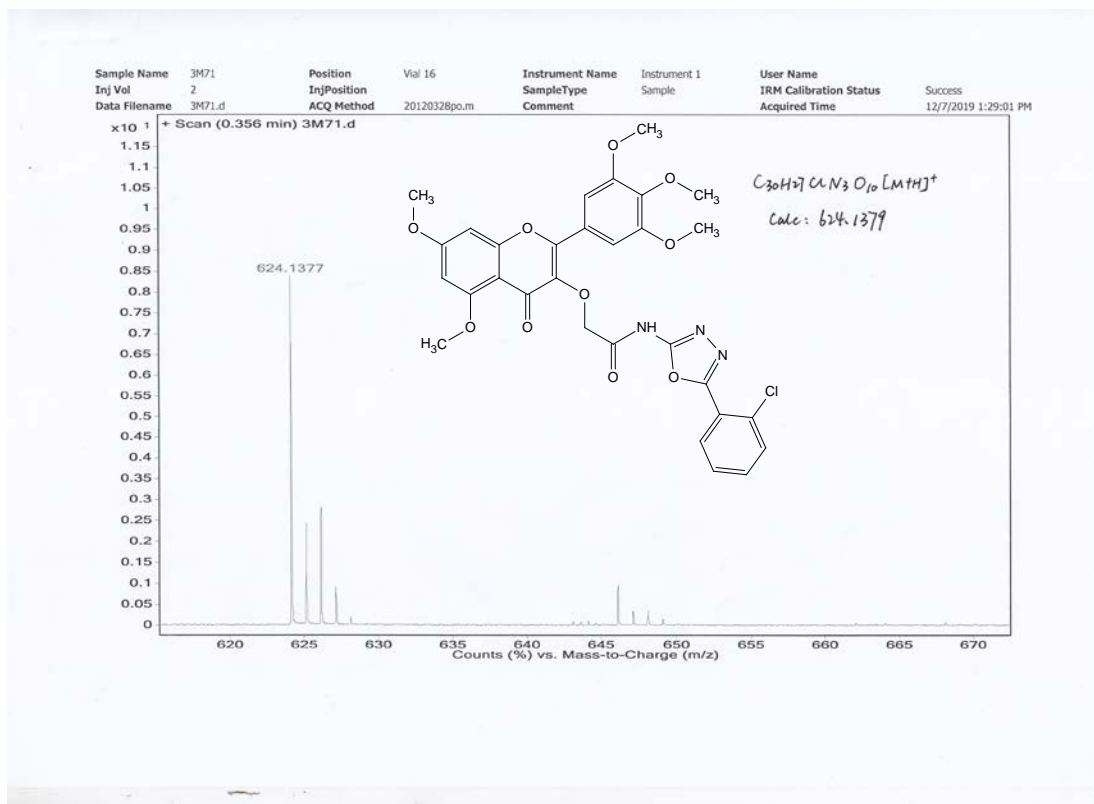

The spectrum of  $^1\text{H}$  NMR,  $^{13}\text{C}$  NMR and HRMS of compound A7

A8

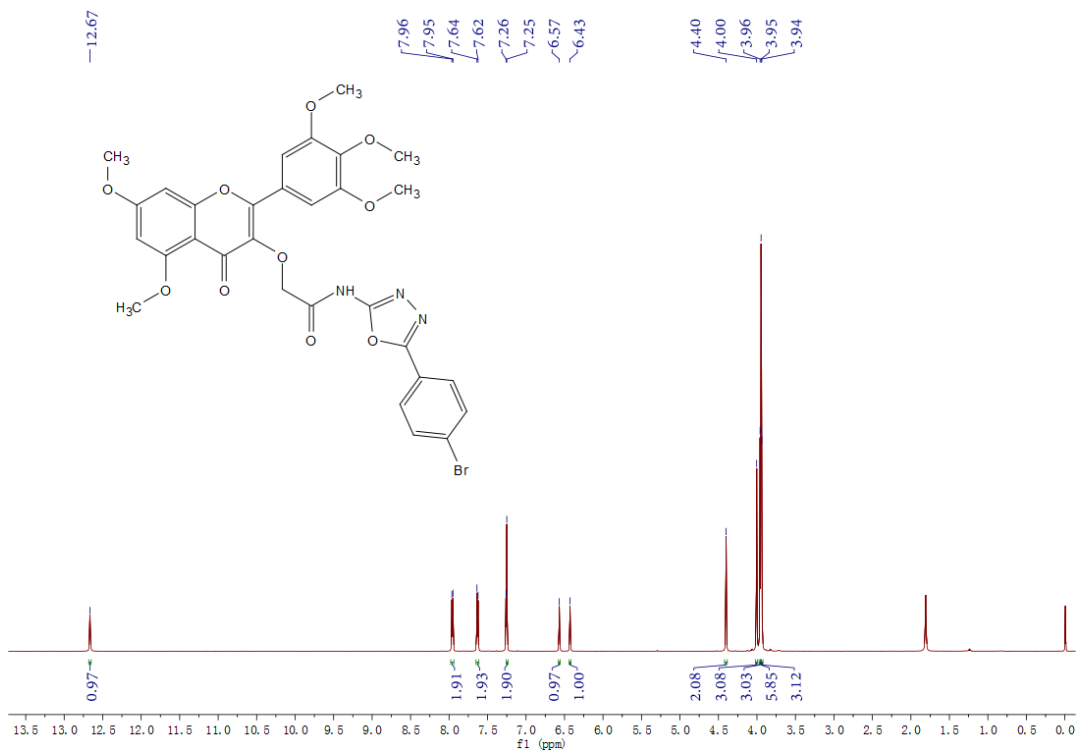

S11



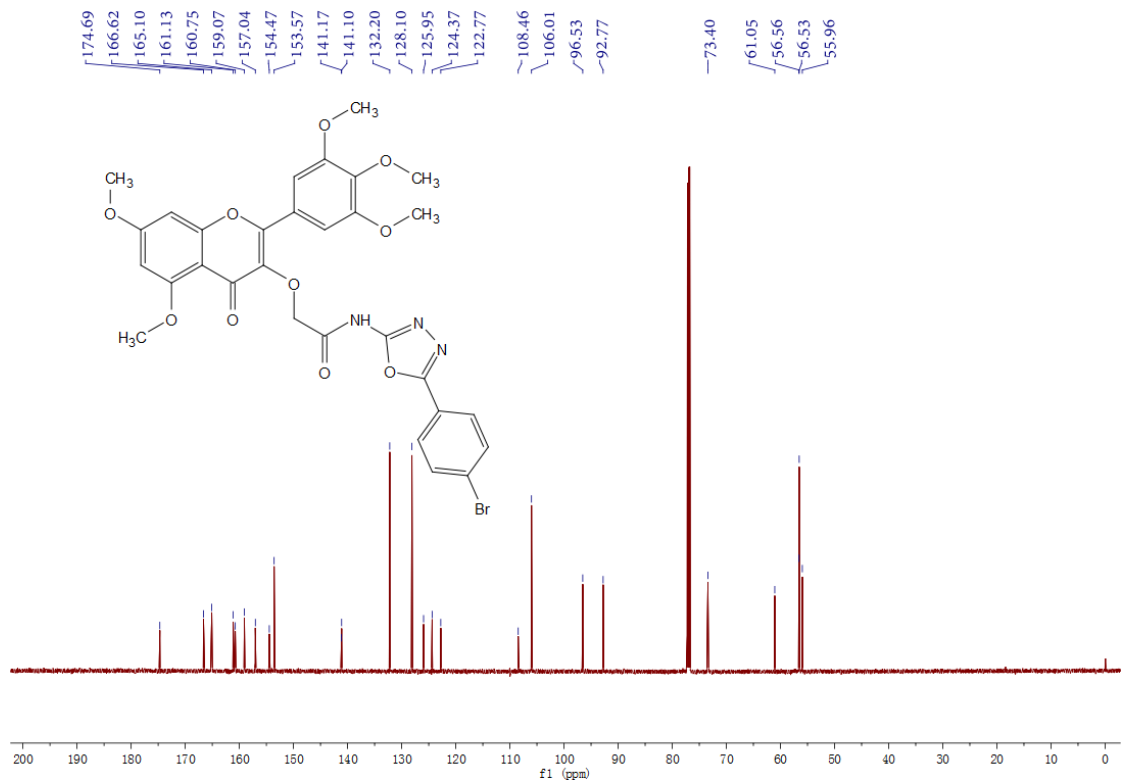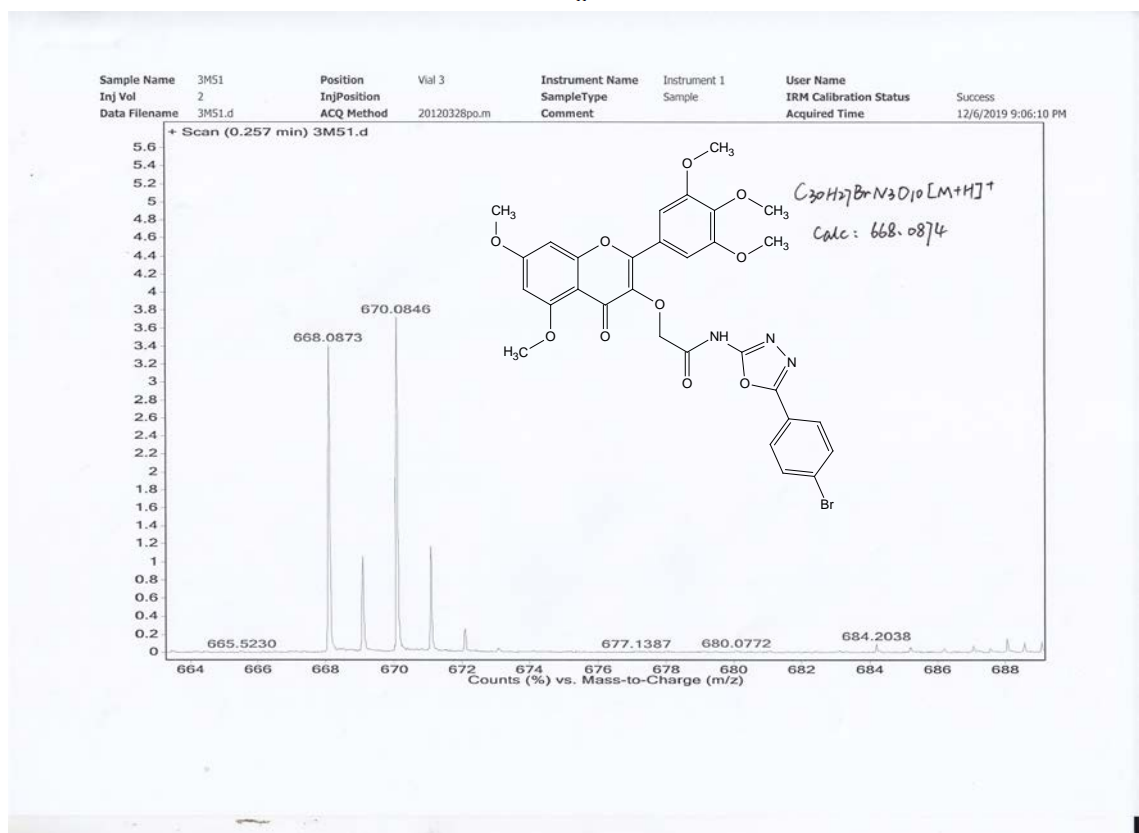

The spectrum of <sup>1</sup>H NMR, <sup>13</sup>C NMR and HRMS of compound A8

A9

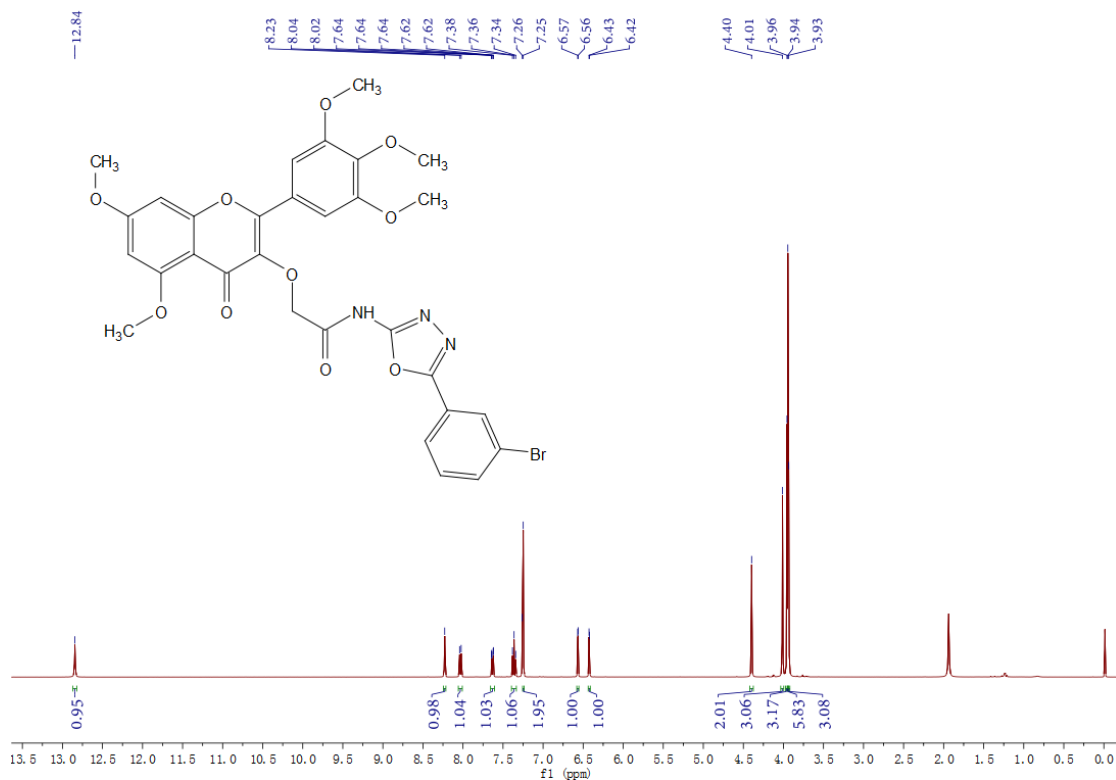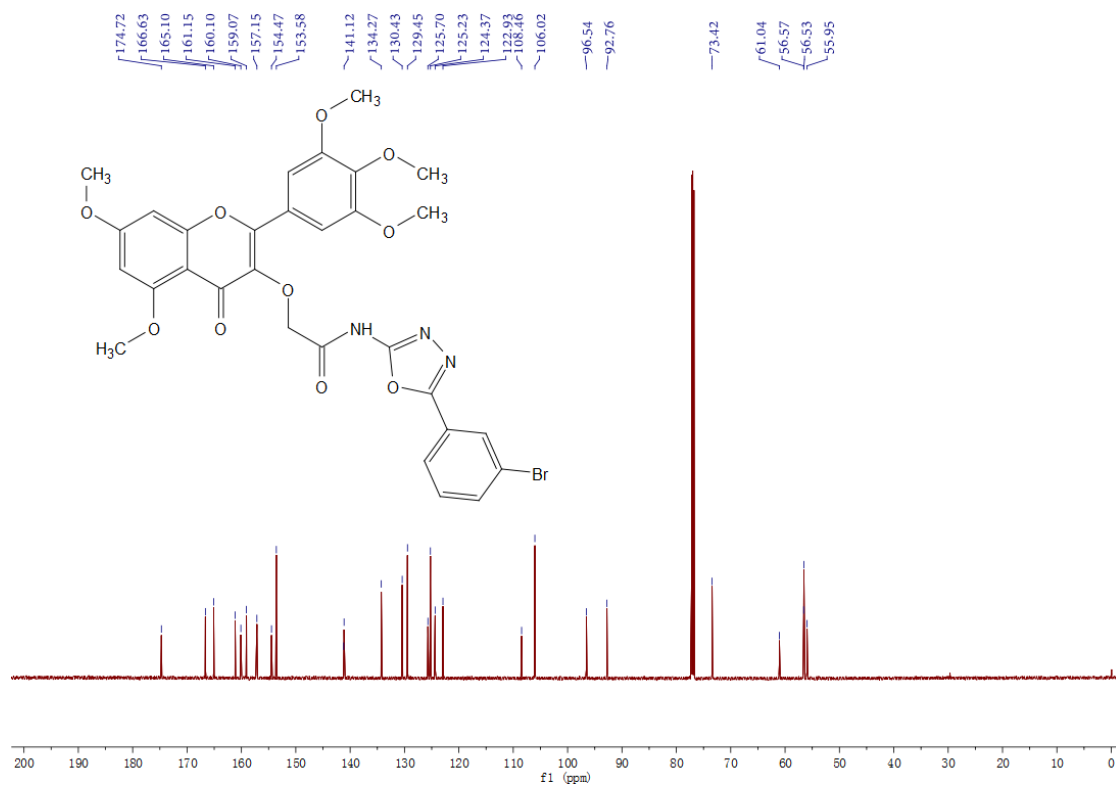

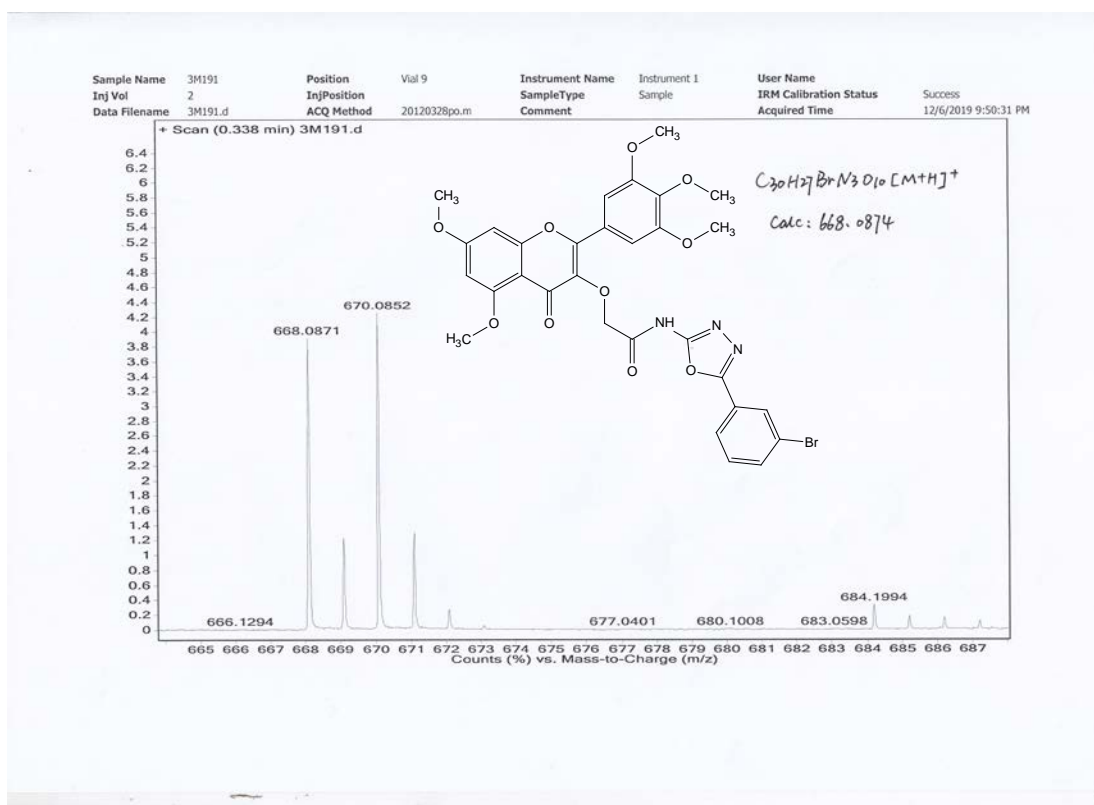

The spectrum of  $^1H$  NMR,  $^{13}C$  NMR and HRMS of compound A9

A10

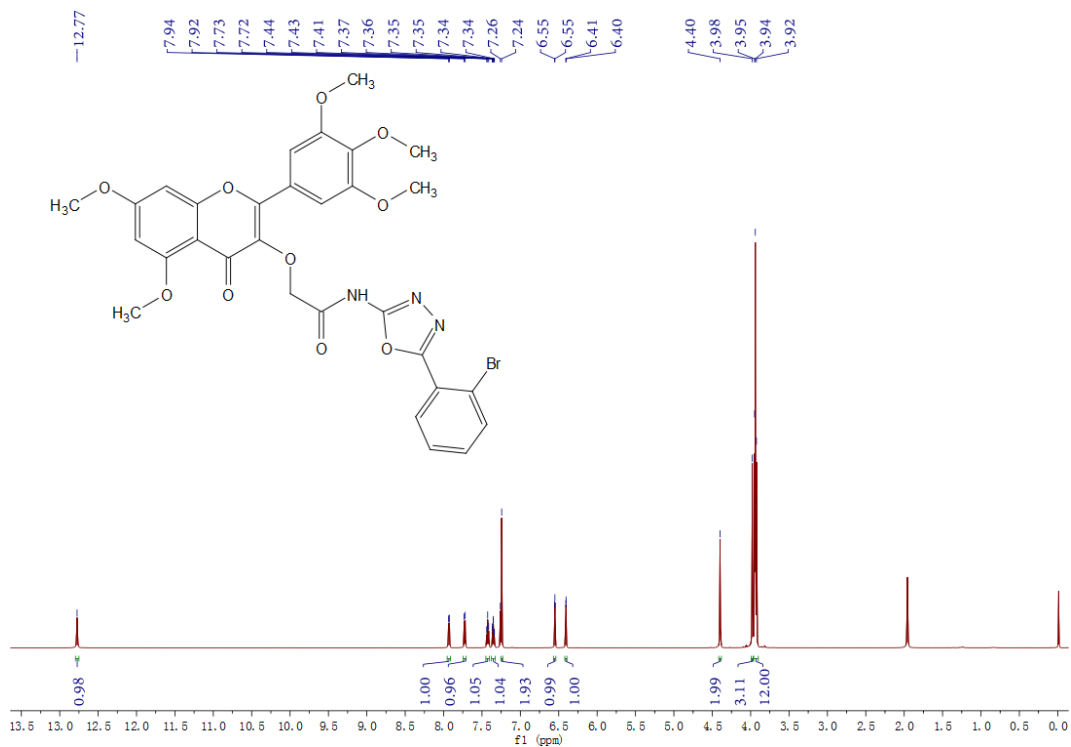

S14

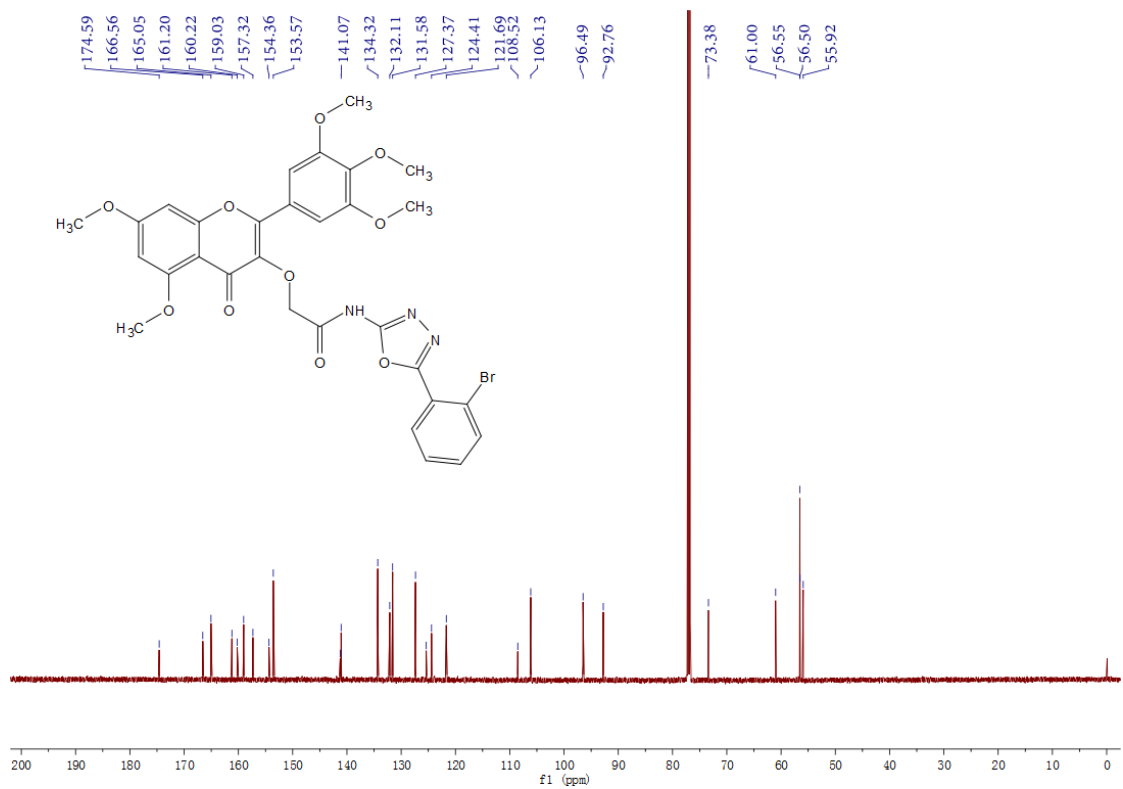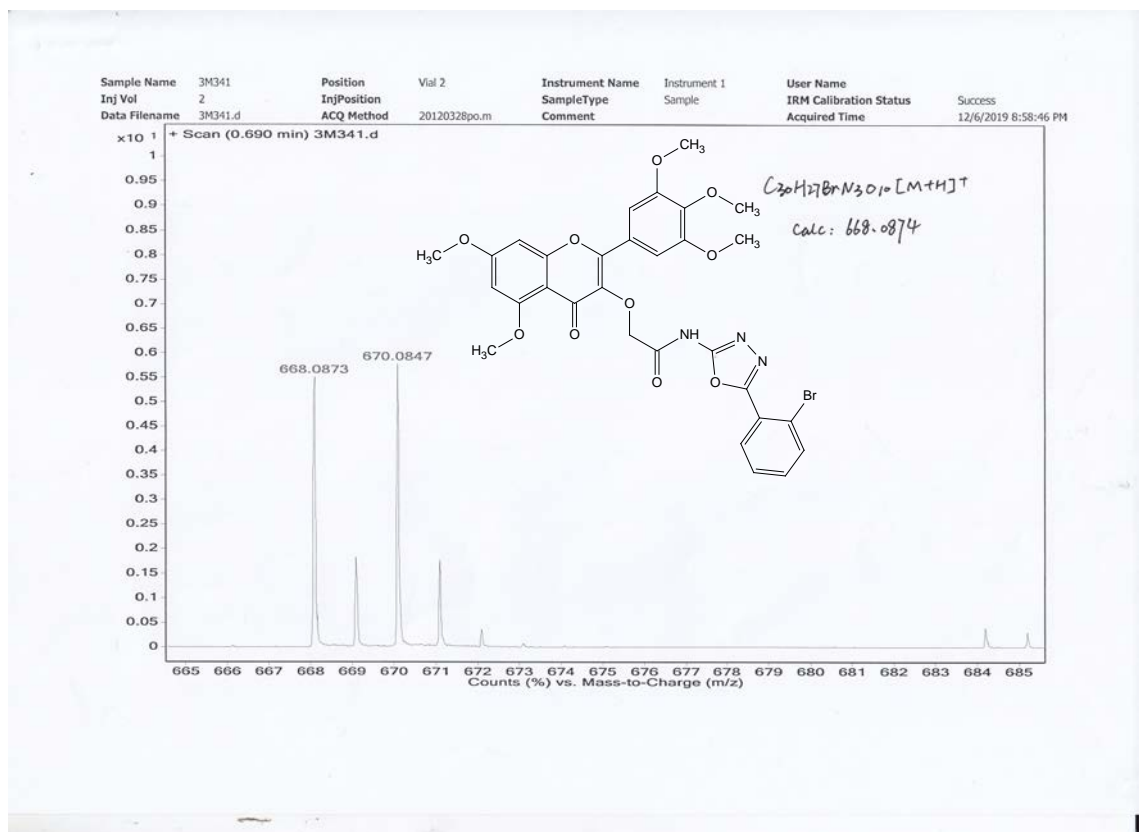

The spectrum of  $^1\text{H}$  NMR,  $^{13}\text{C}$  NMR and HRMS of compound A10

# A11

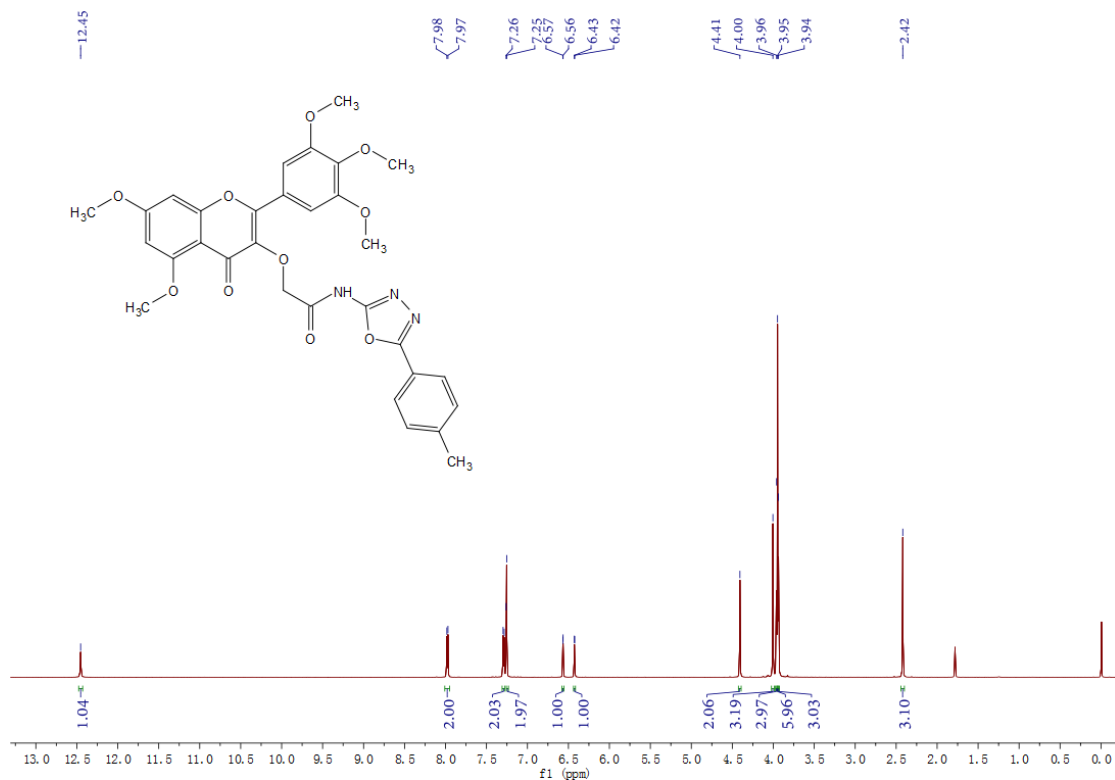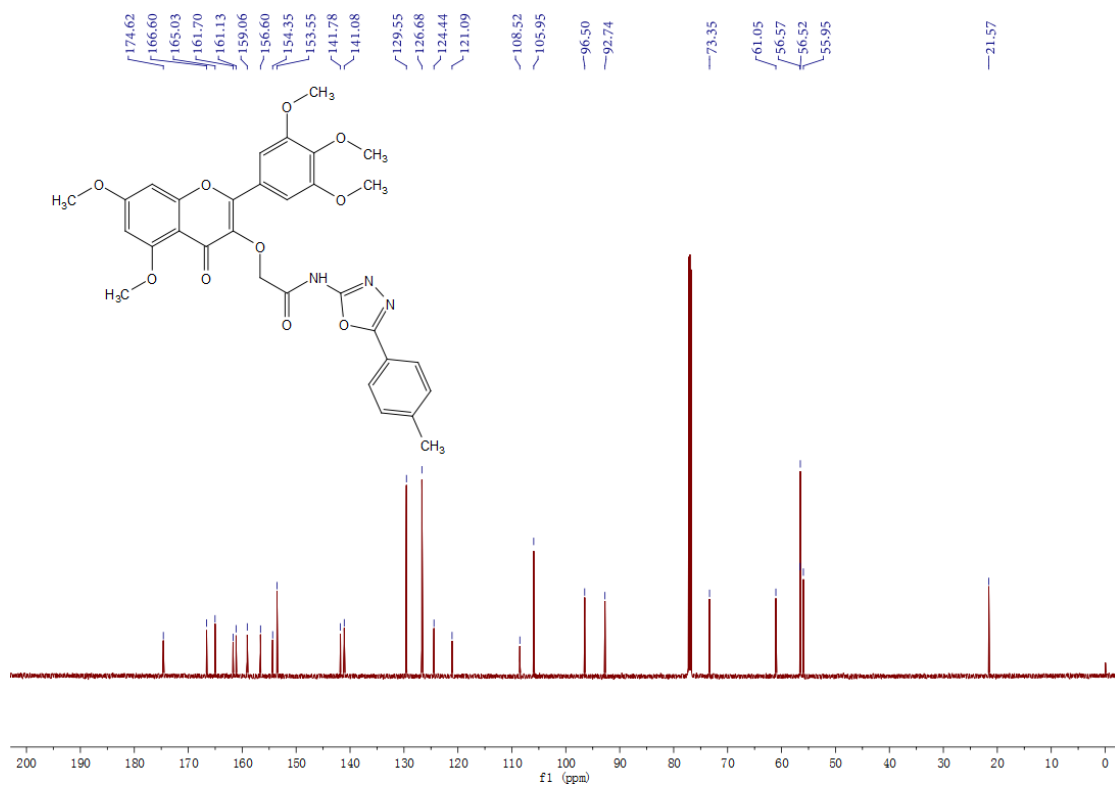

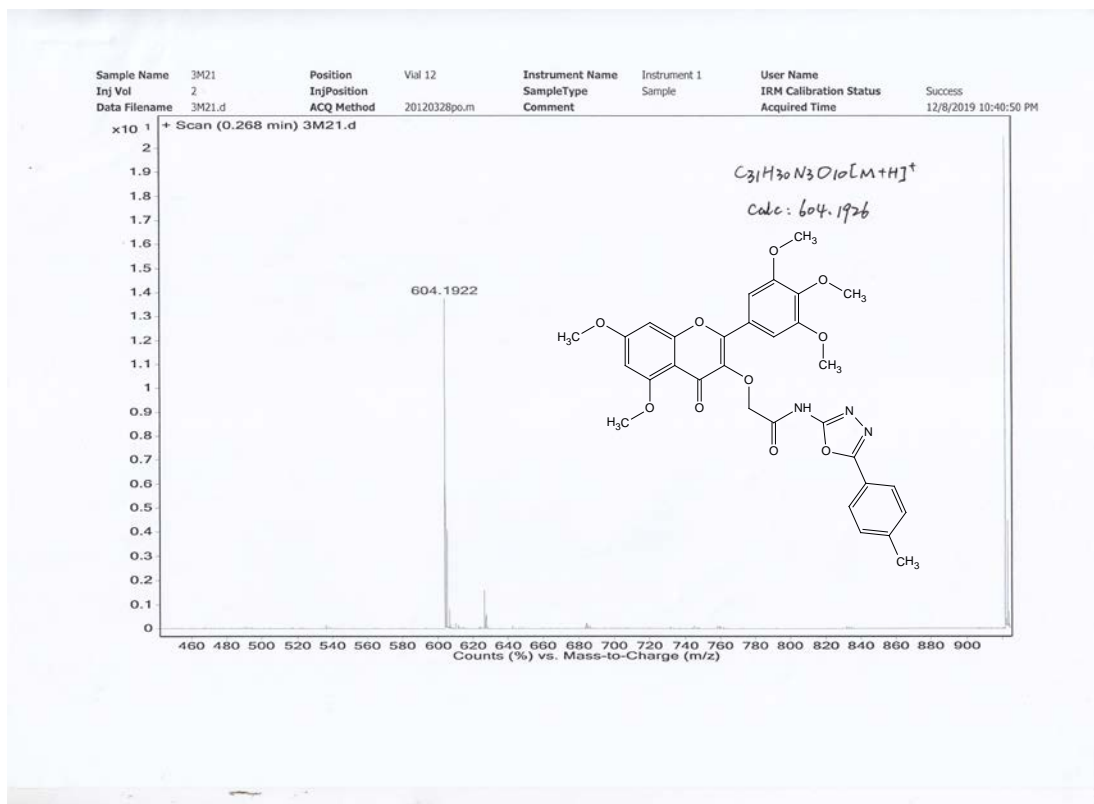

The spectrum of  $^1H$  NMR,  $^{13}C$  NMR and HRMS of compound A11

A12

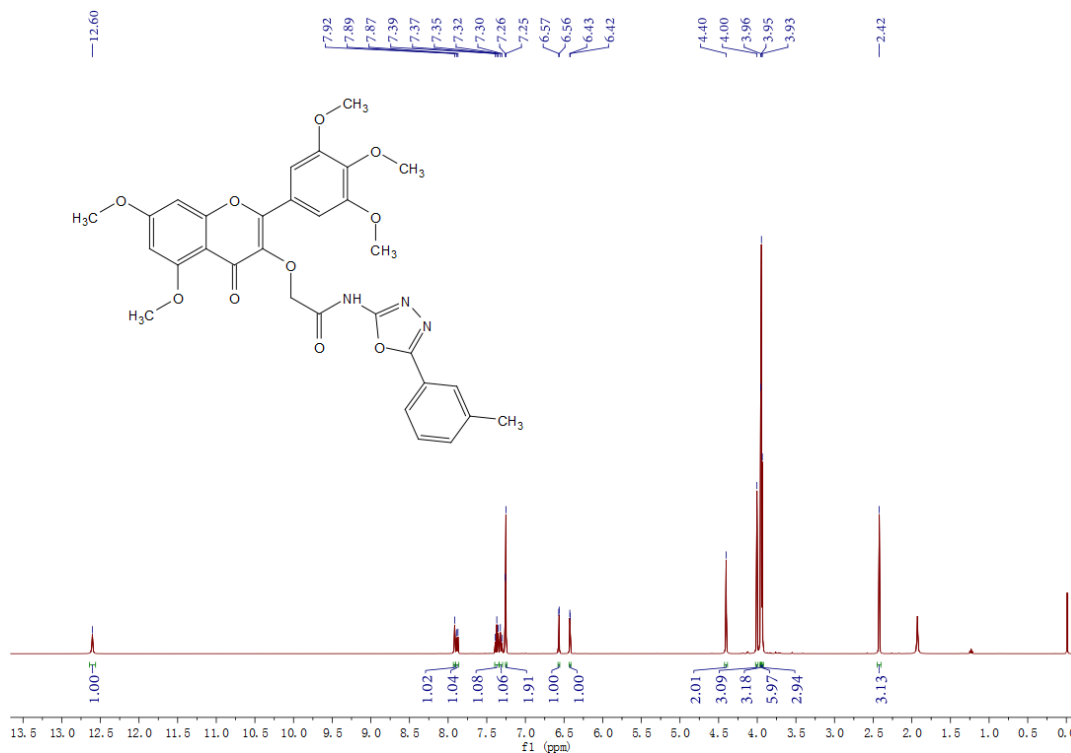

S17

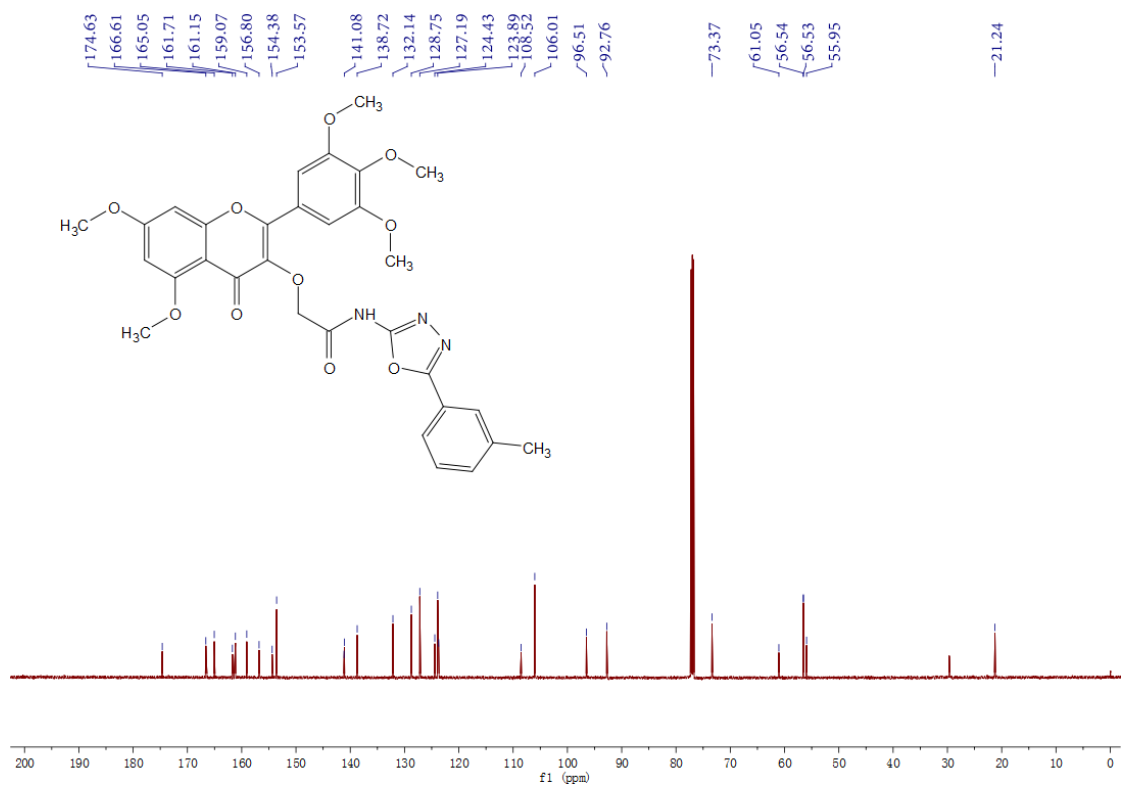

The spectrum of  $^1\text{H}$  NMR and  $^{13}\text{C}$  NMR of compound A12

### A13

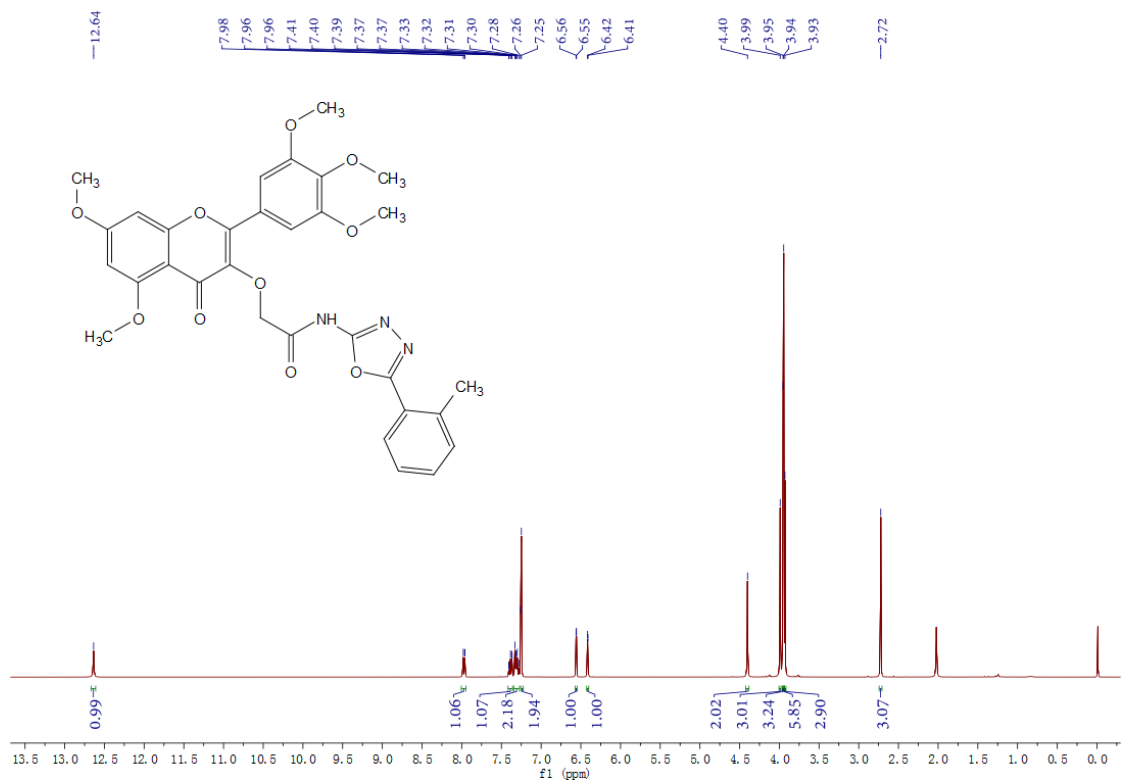

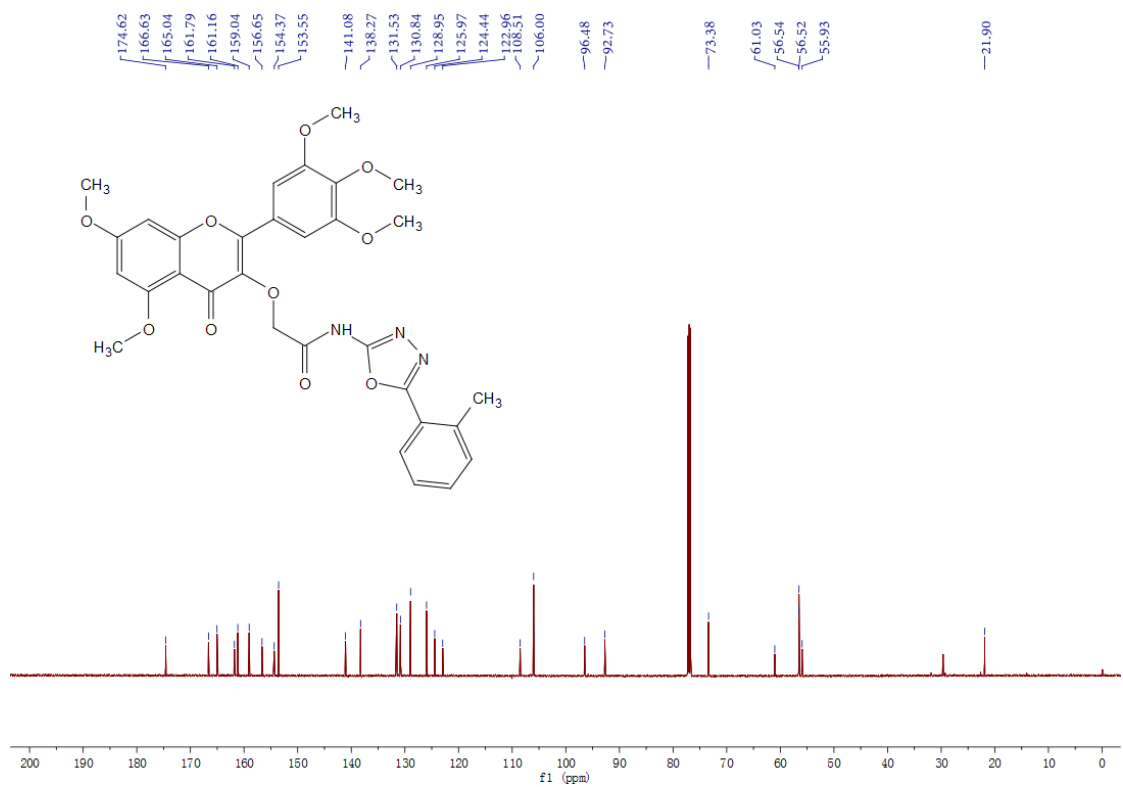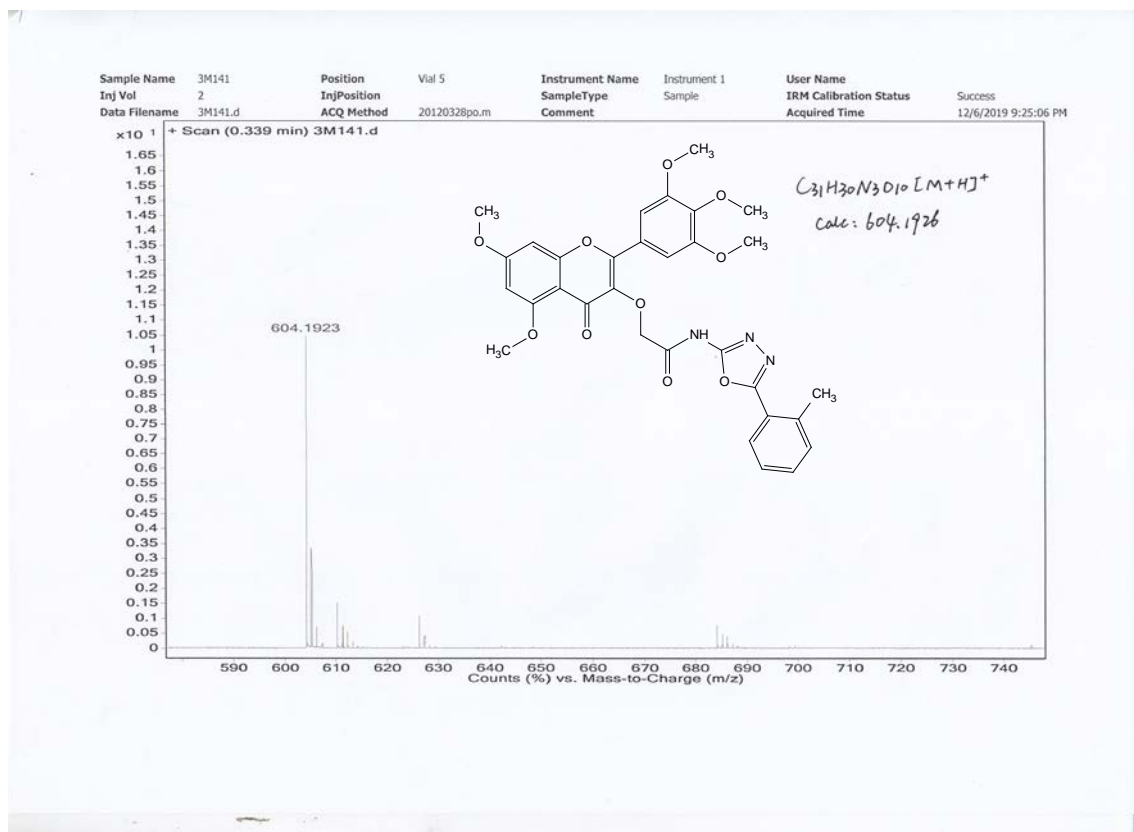

The spectrum of  $^1H$  NMR,  $^{13}C$  NMR and HRMS of compound A13



# A14

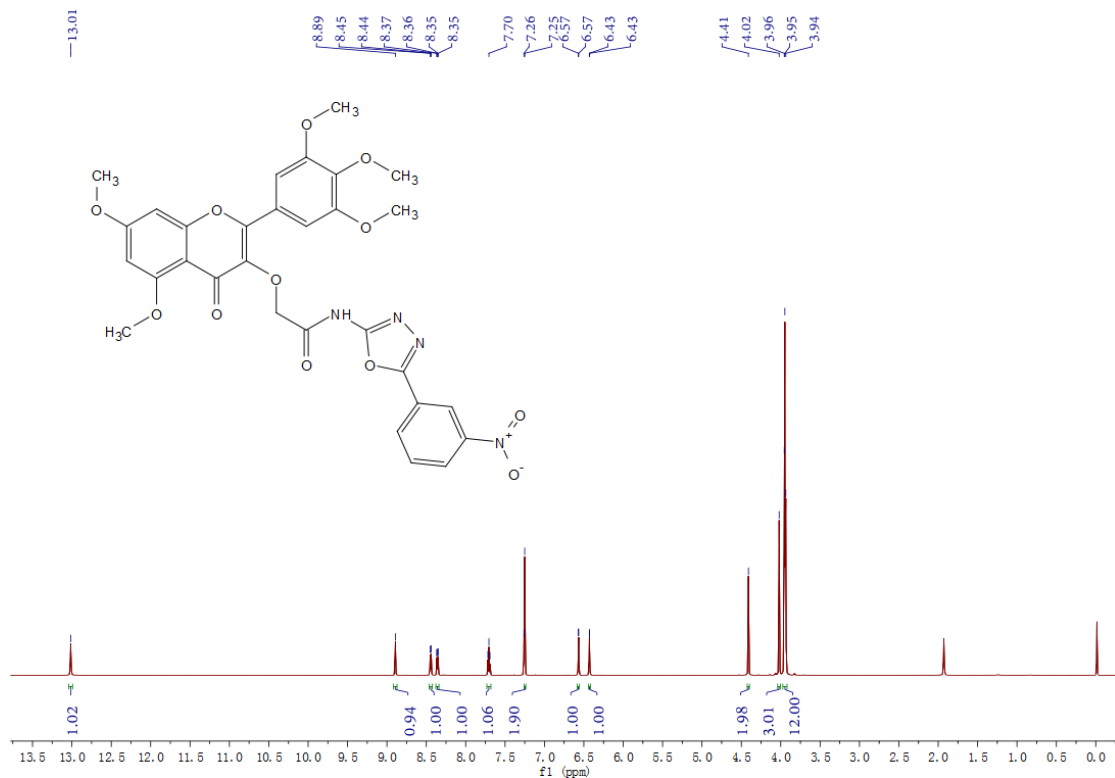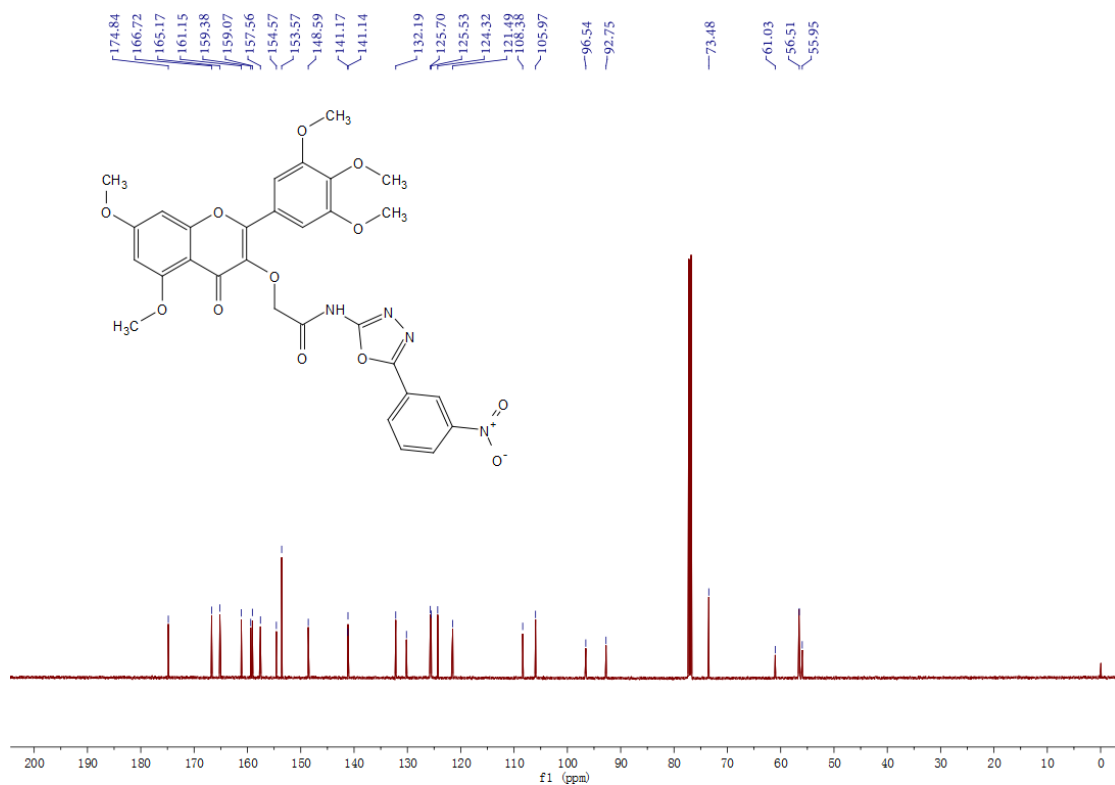

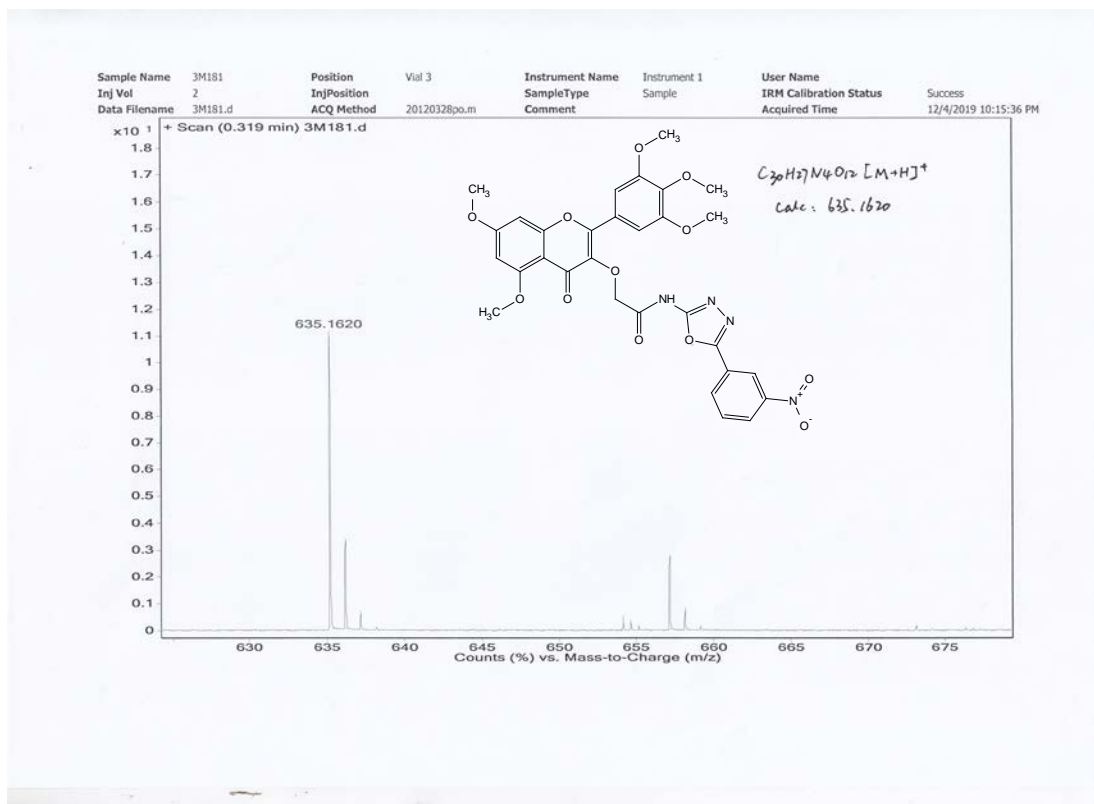

The spectrum of  $^1H$  NMR,  $^{13}C$  NMR and HRMS of compound A14

A15

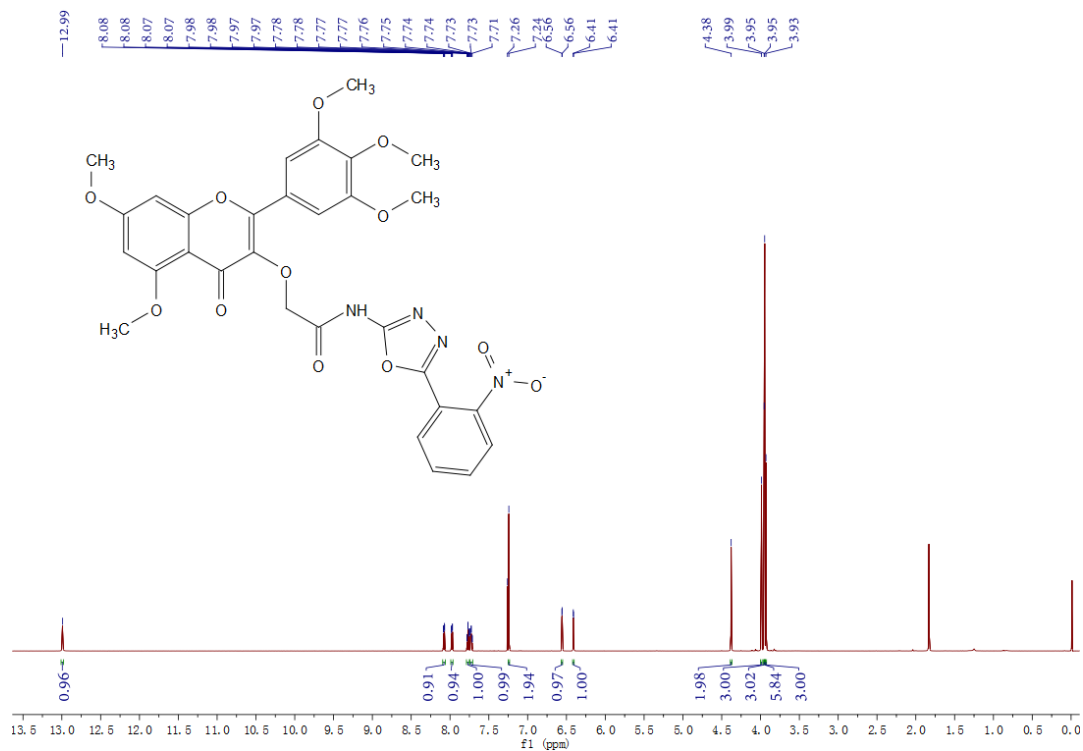

S21

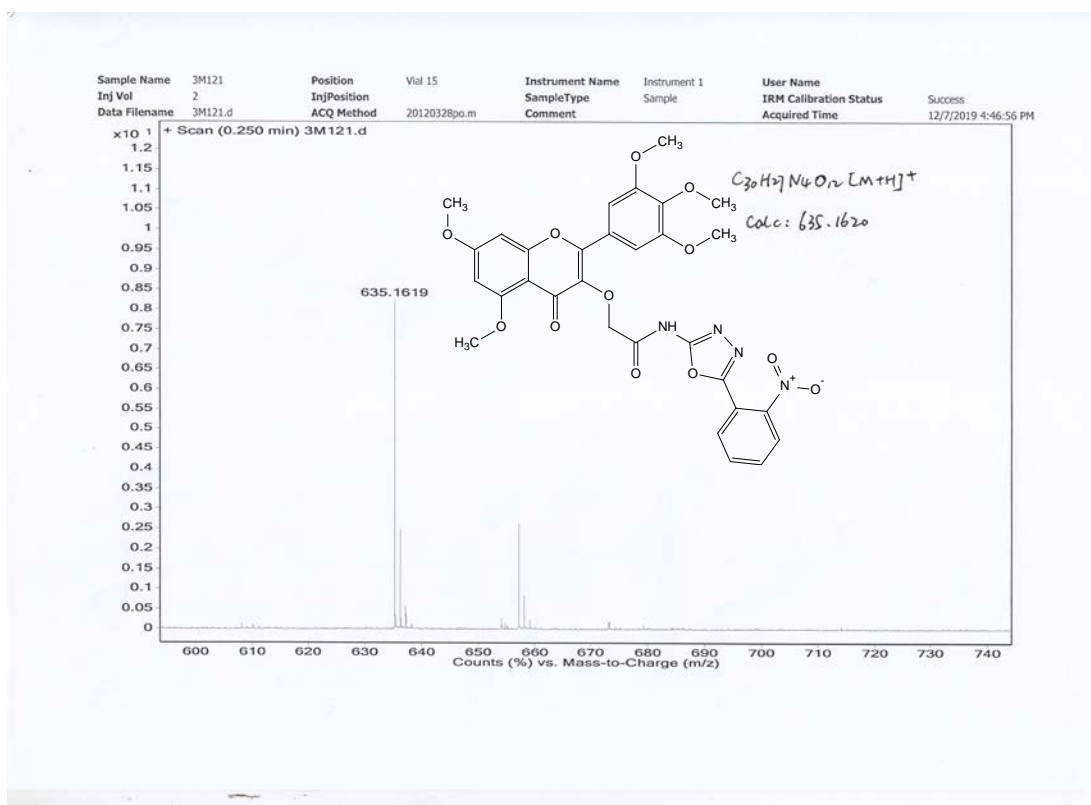

The spectrum of  $^1H$  NMR and HRMS of compound A15

A16

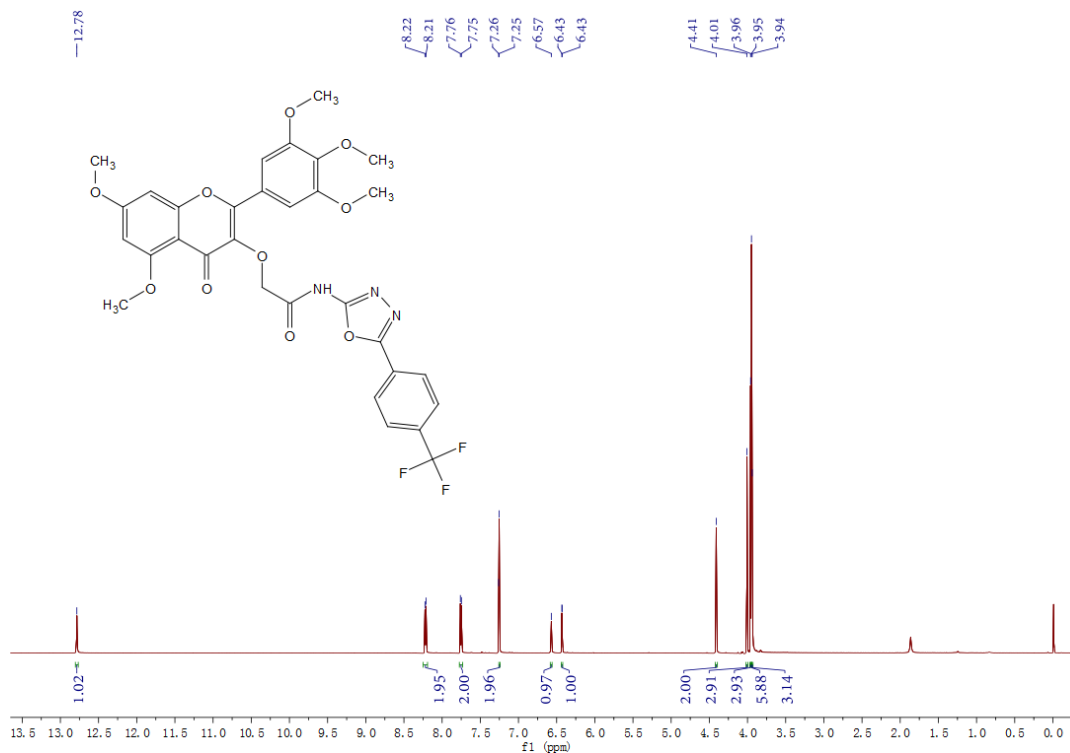

S22

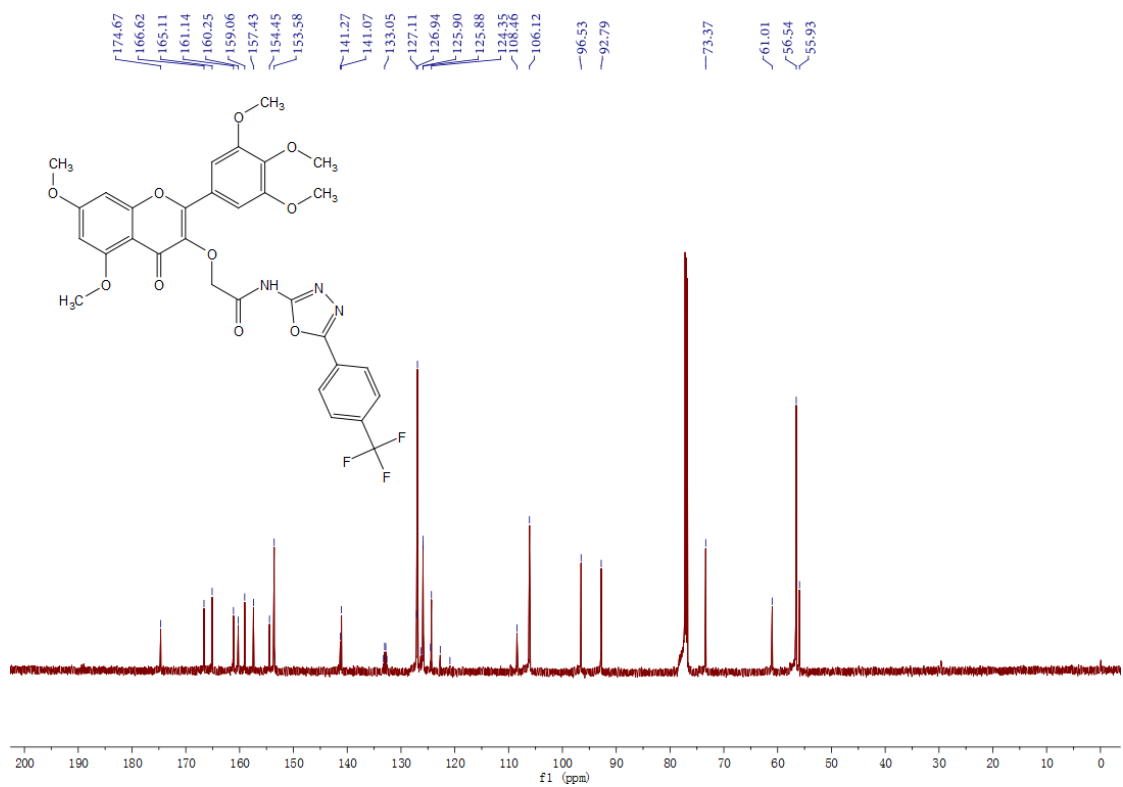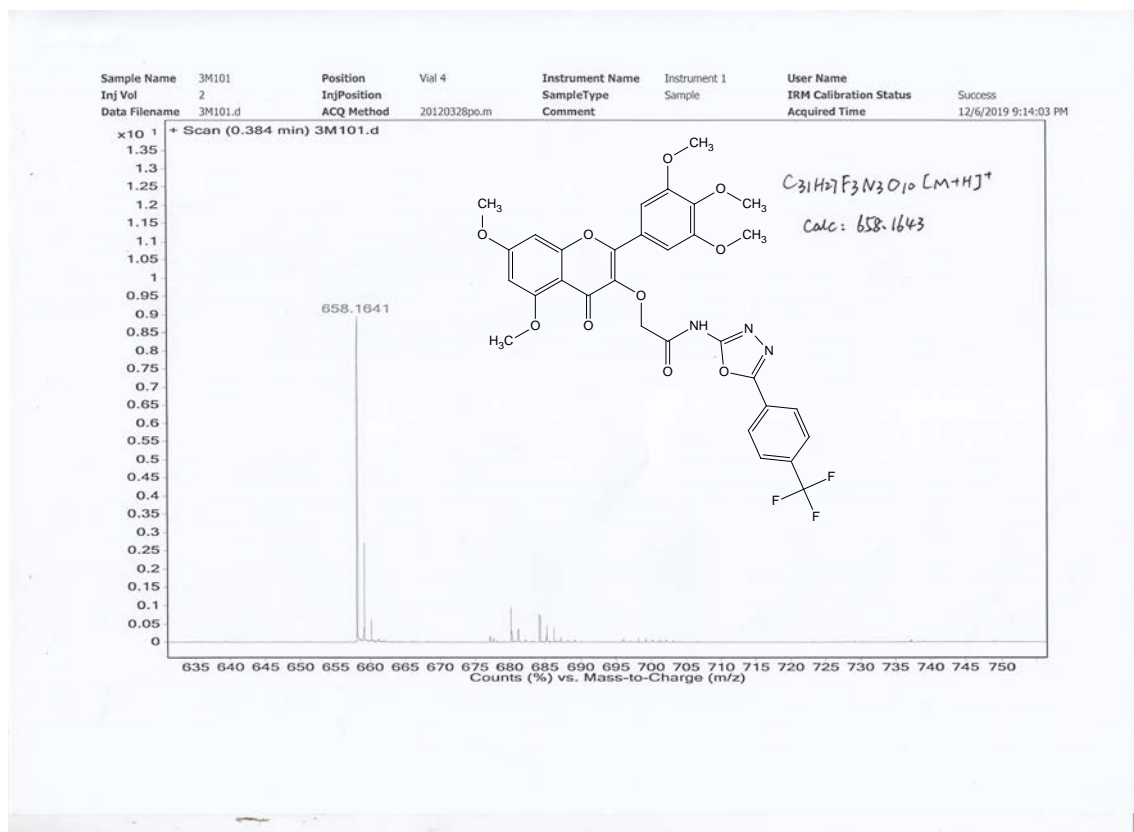

The spectrum of  $^1H$  NMR,  $^{13}C$  NMR and HRMS of compound A16

A17

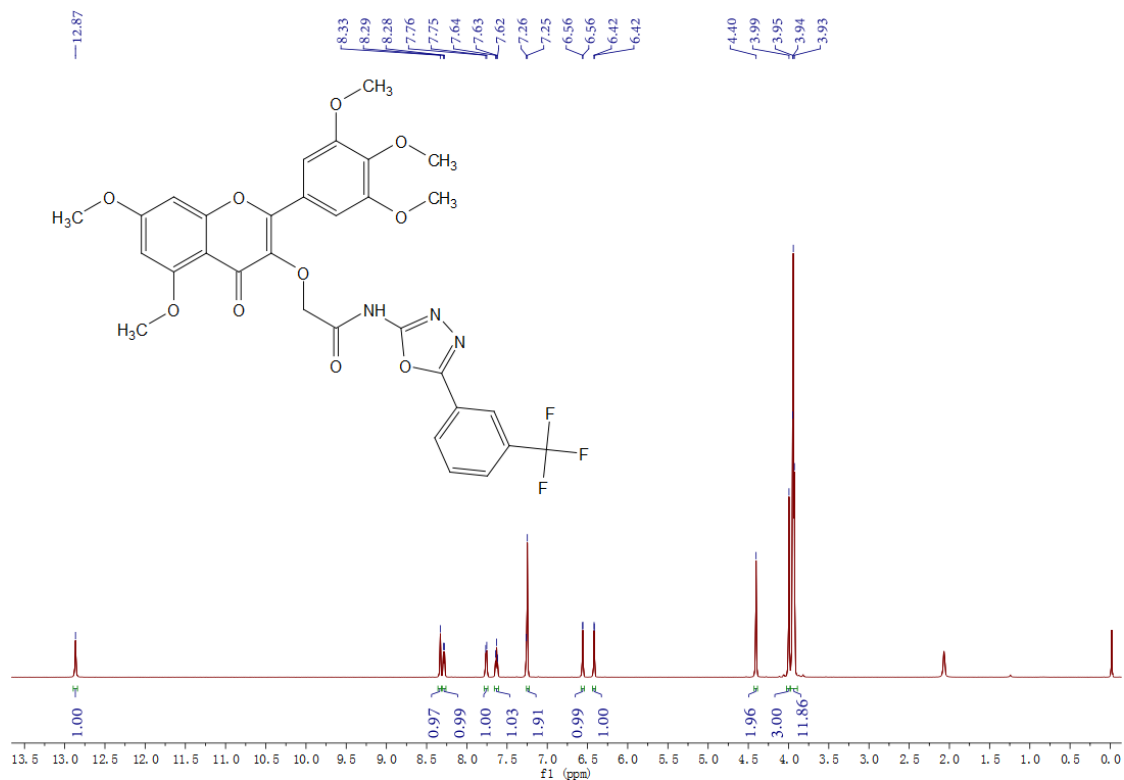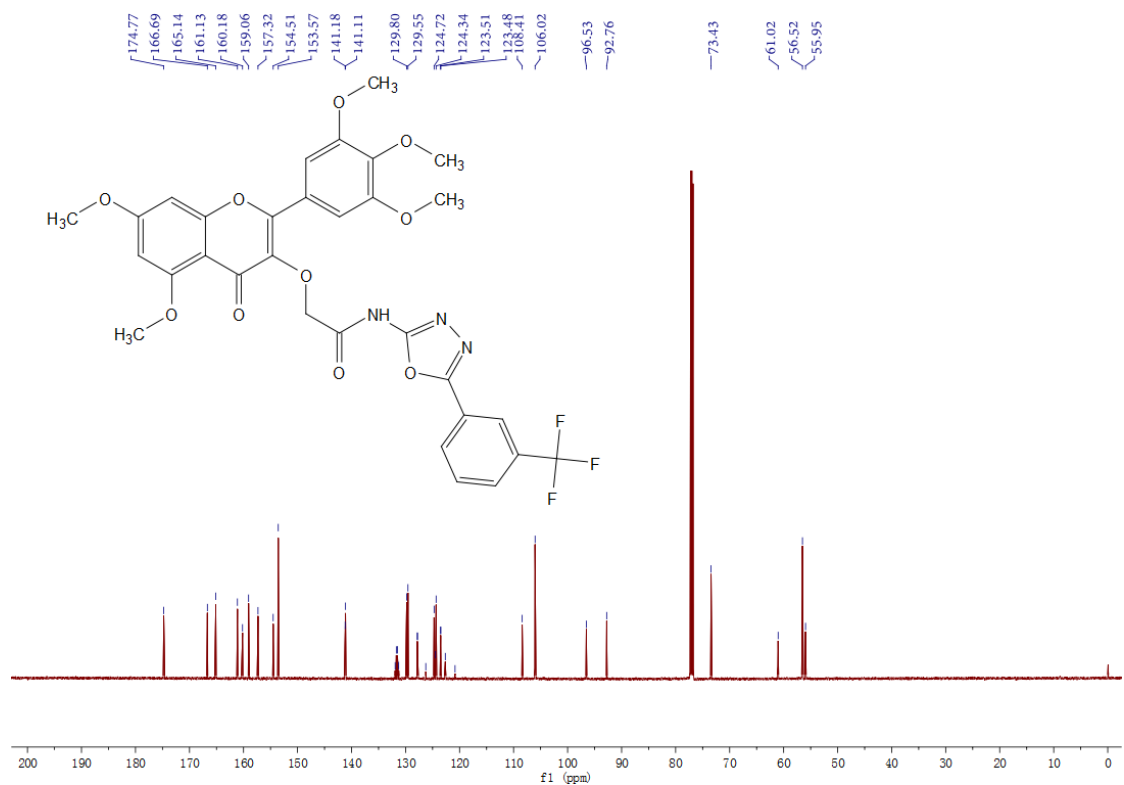

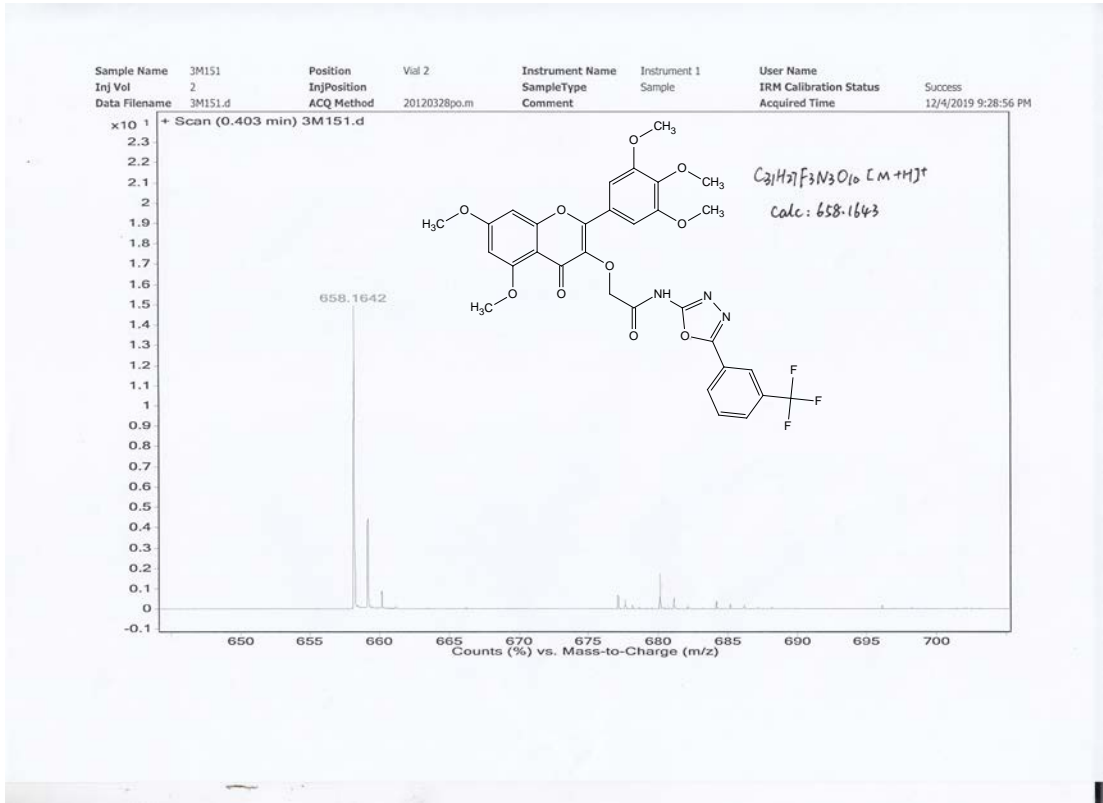

The spectrum of  $^1H$  NMR,  $^{13}C$  NMR and HRMS of compound A17

A18

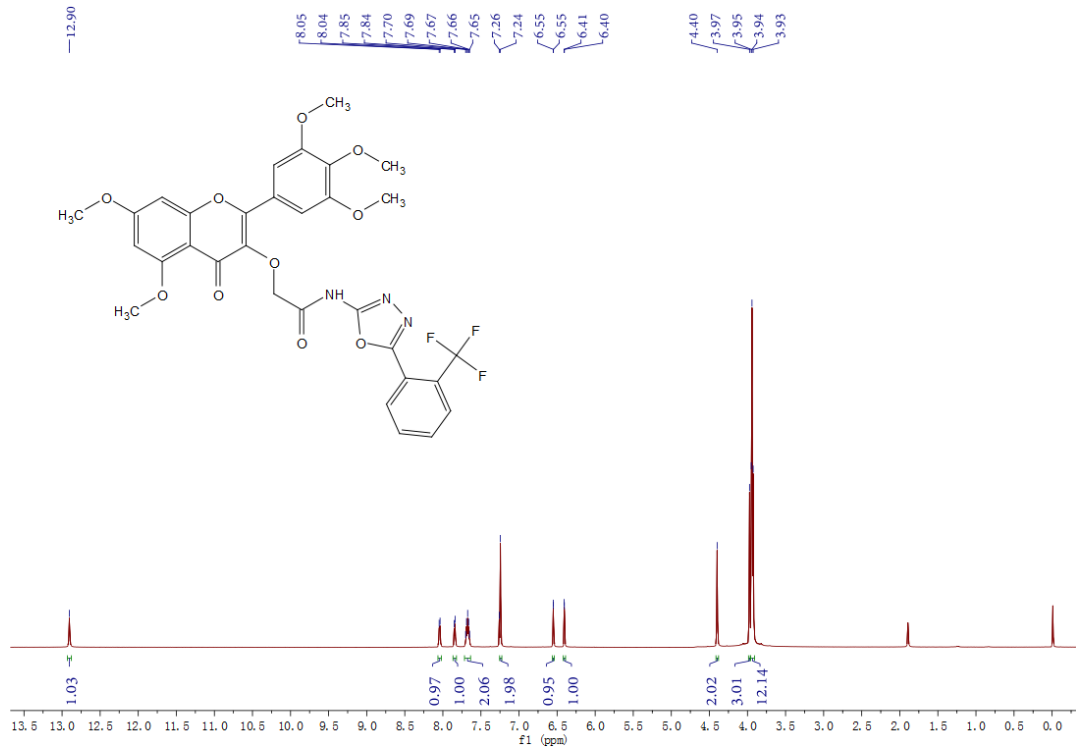

S25

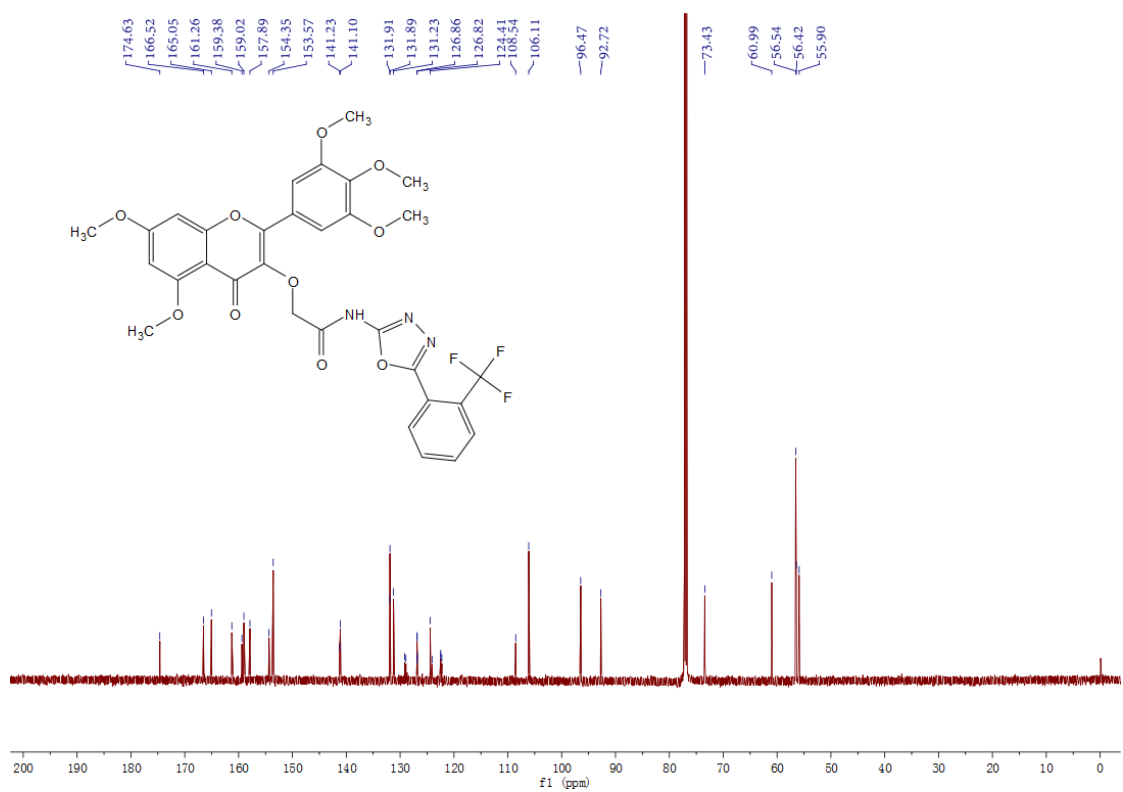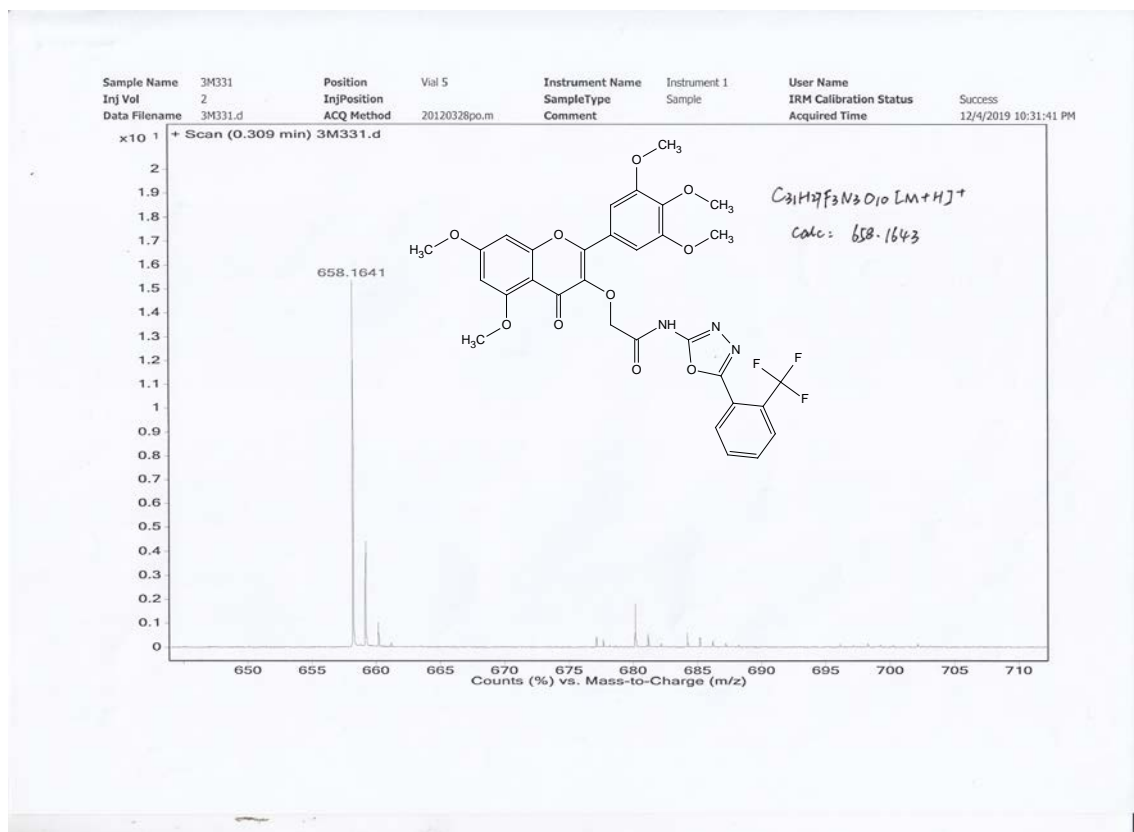

The spectrum of  $^1\text{H}$  NMR,  $^{13}\text{C}$  NMR and HRMS of compound A18

# A19

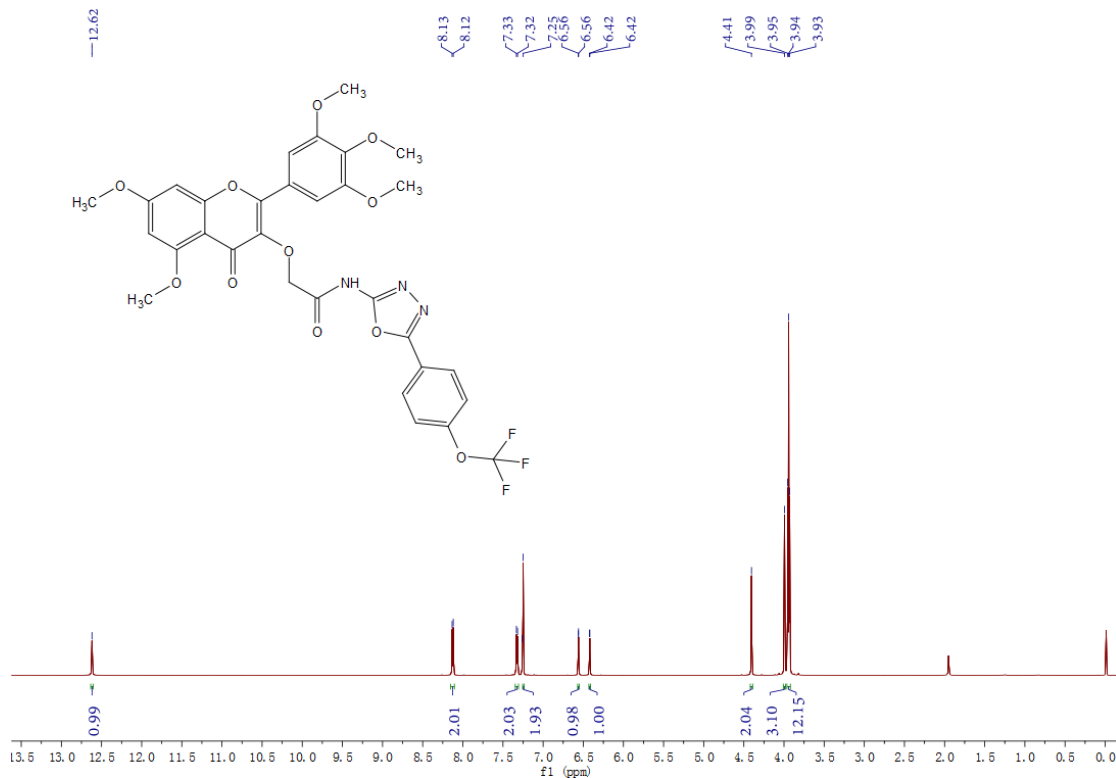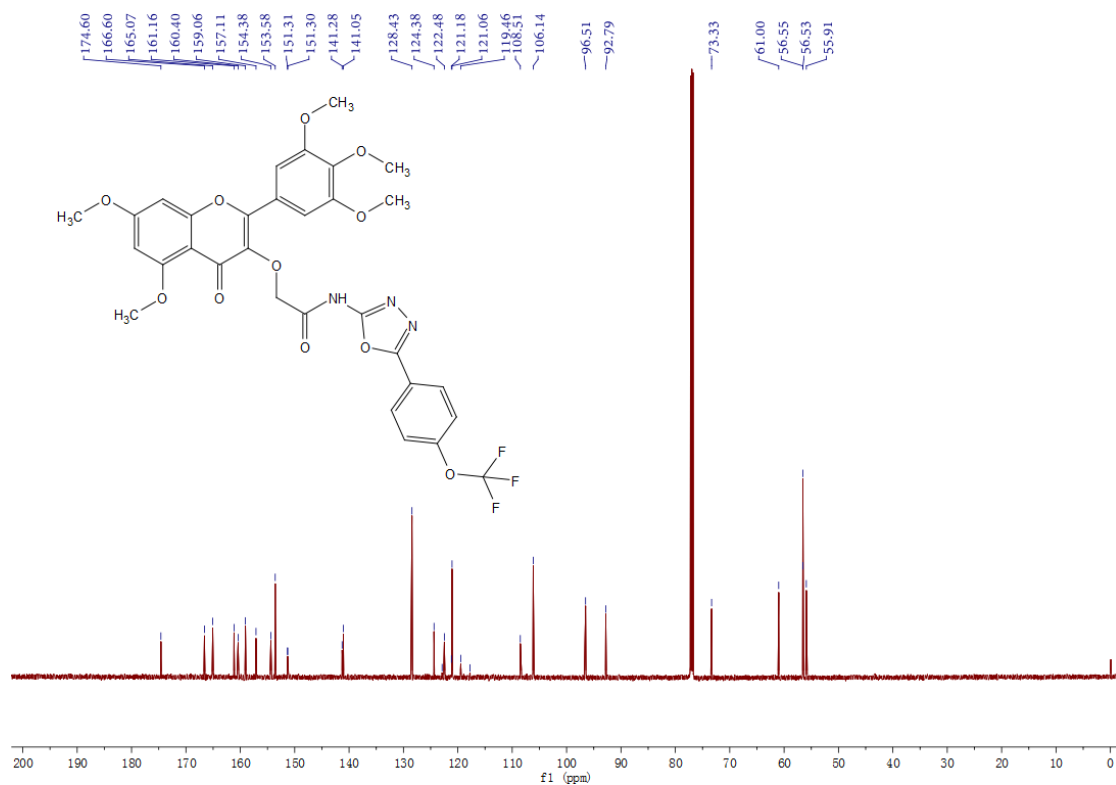



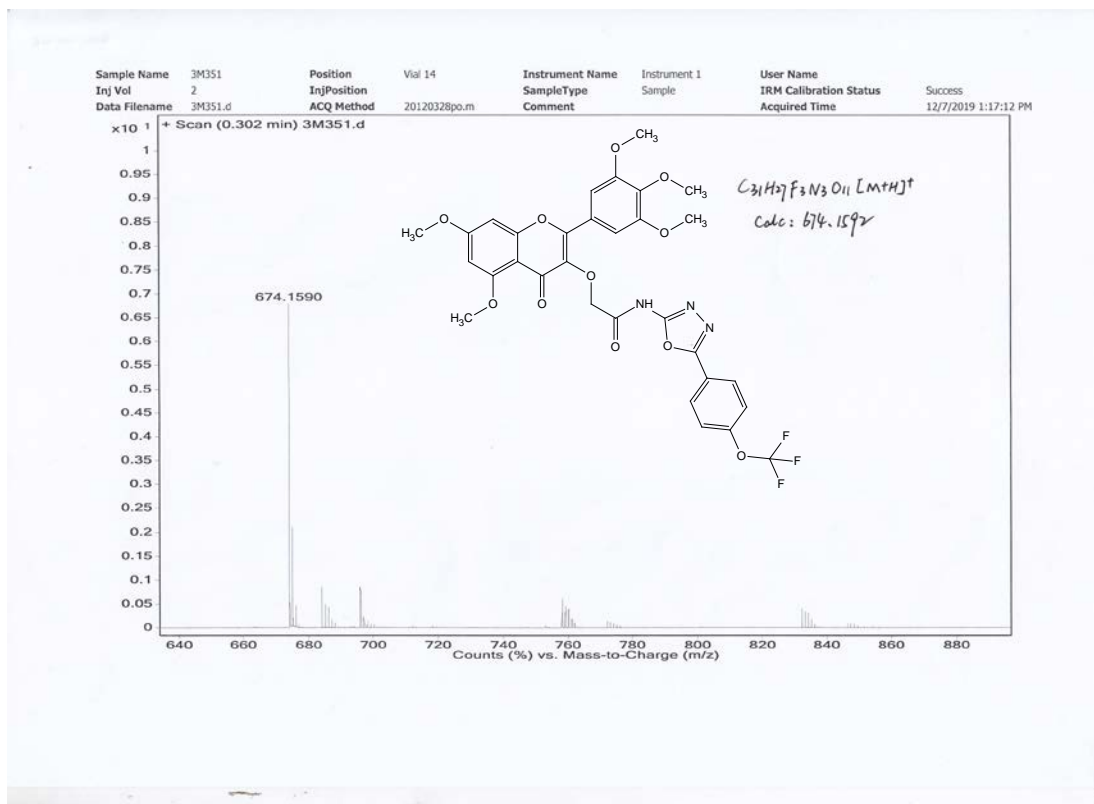

The spectrum of  $^1\text{H}$  NMR,  $^{13}\text{C}$  NMR and HRMS of compound A19

A20

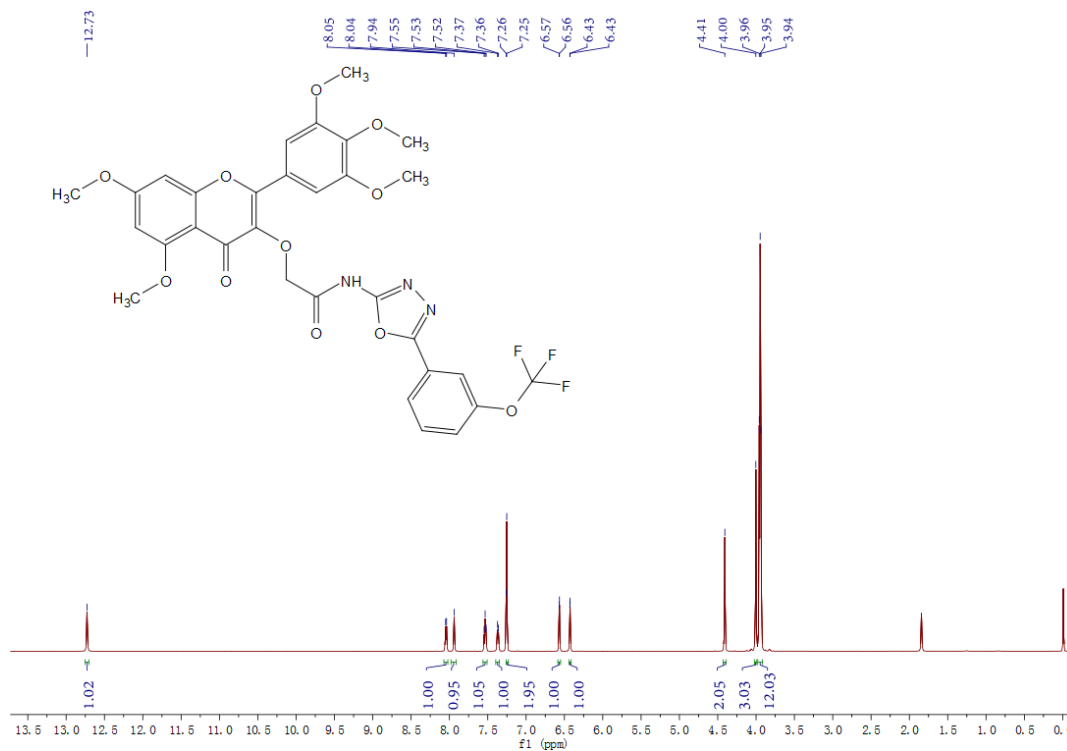

S28

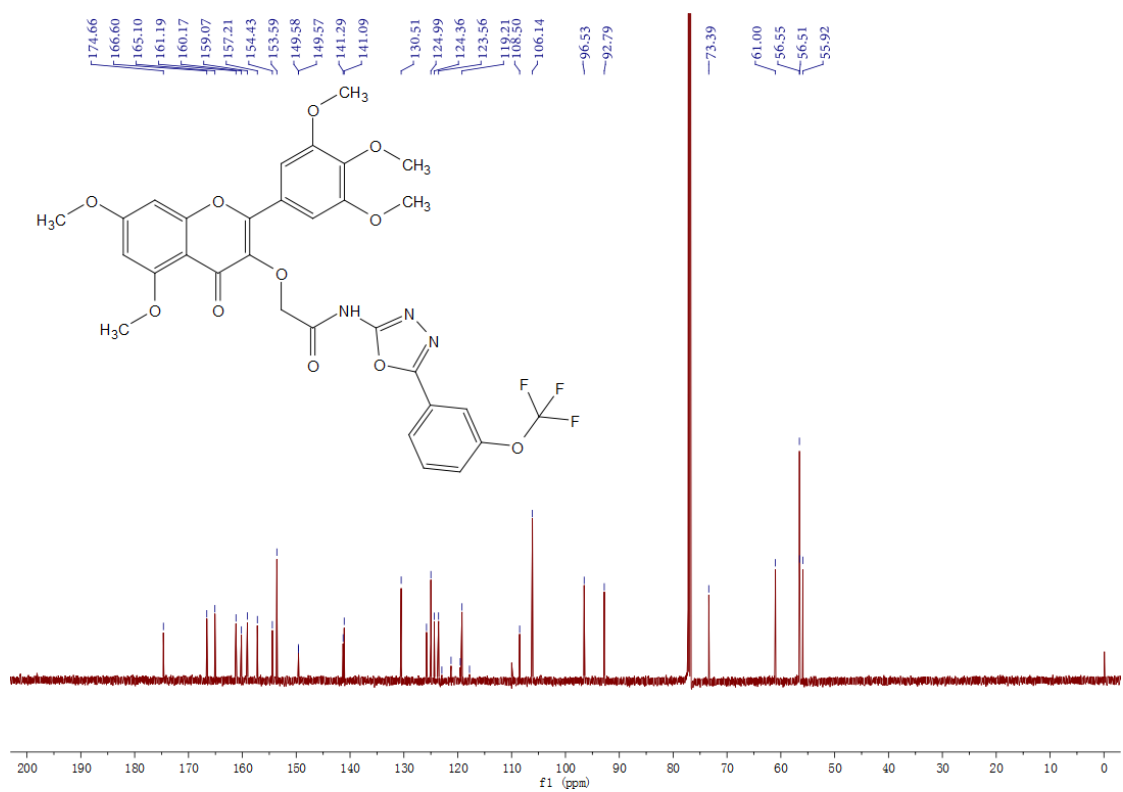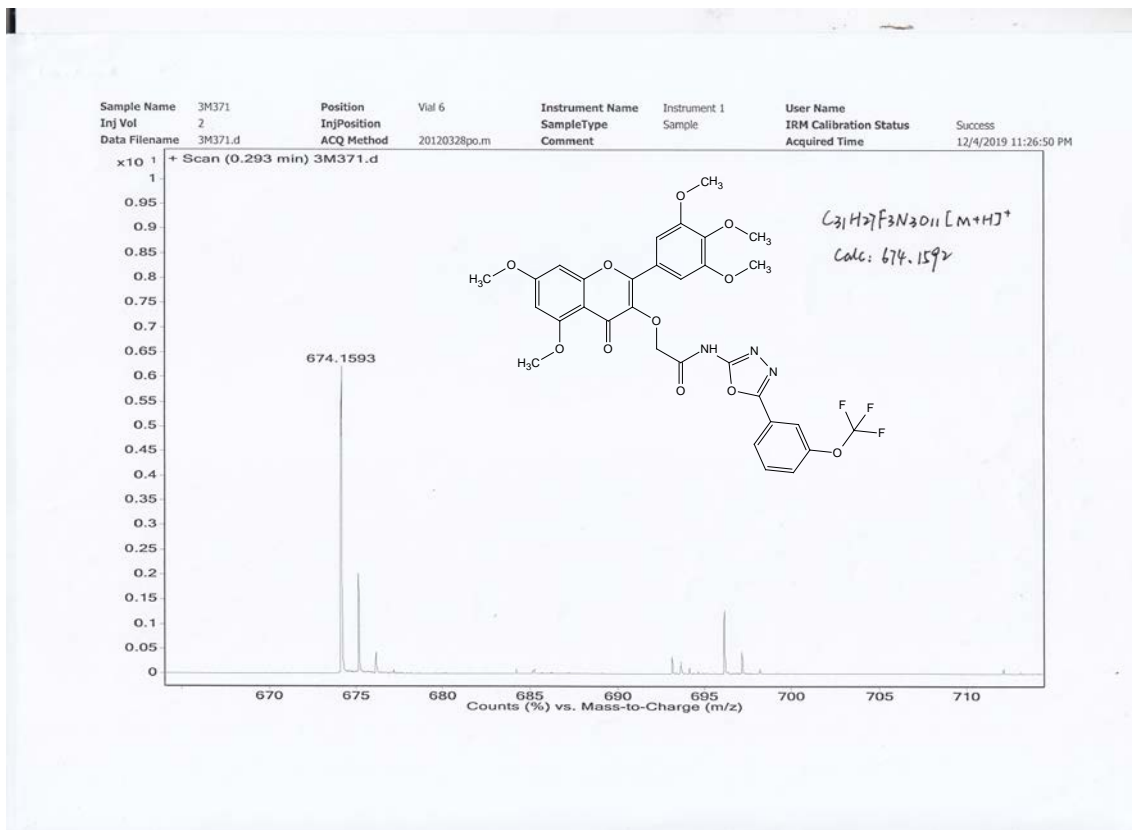

The spectrum of  $^1\text{H}$  NMR,  $^{13}\text{C}$  NMR and HRMS of compound A20

A21

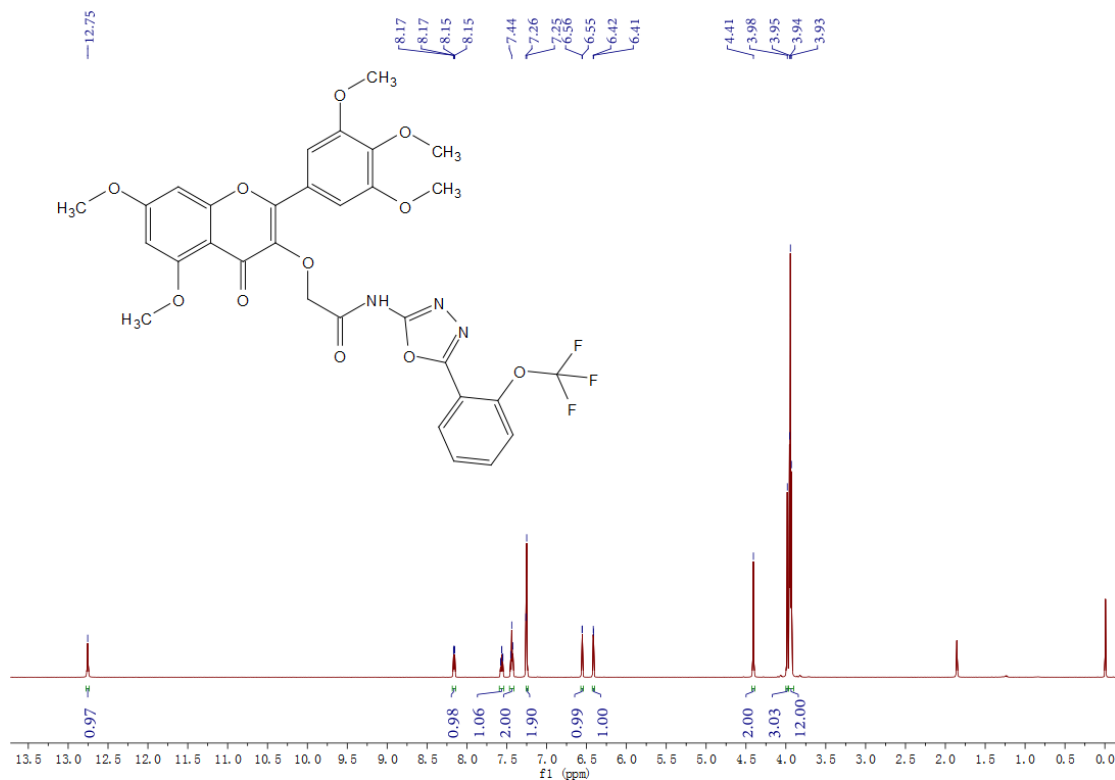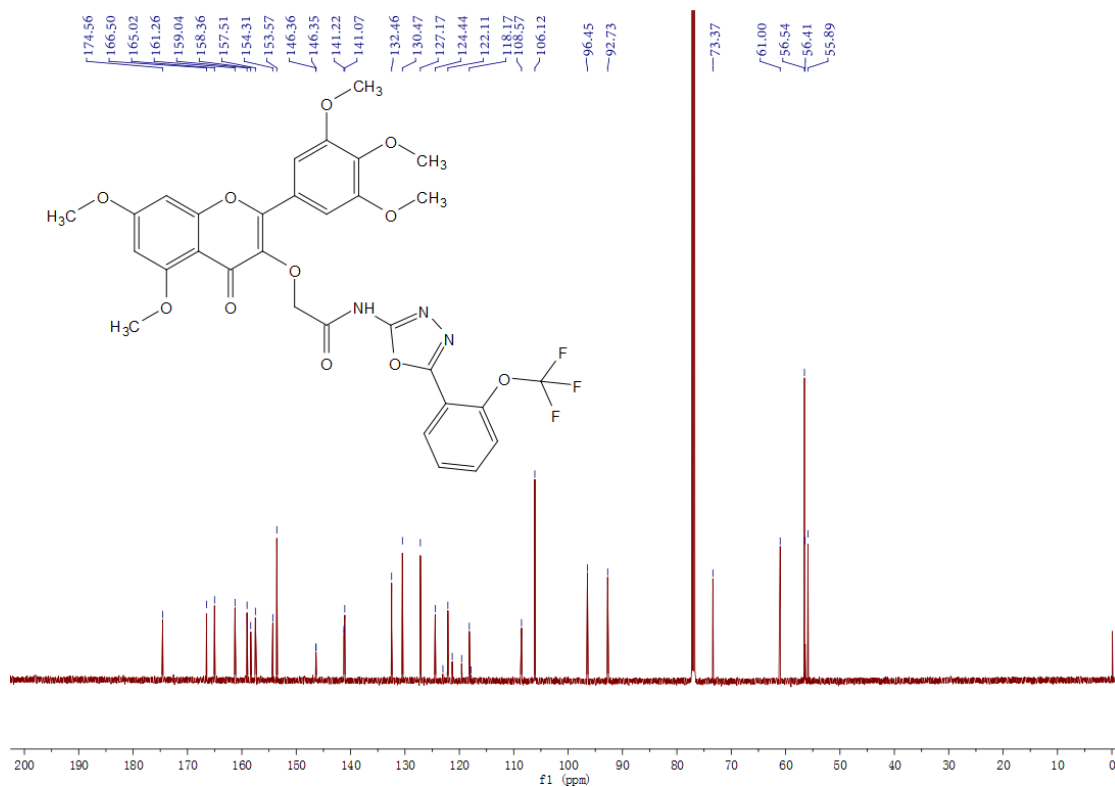

S30

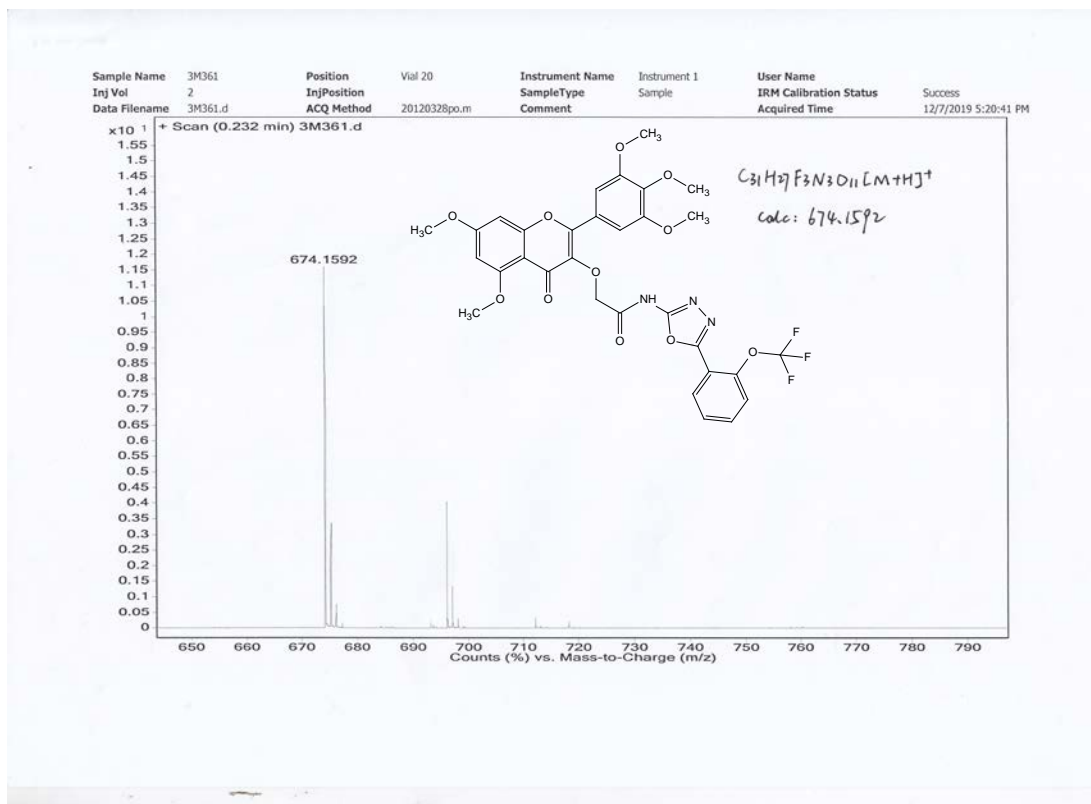

The spectrum of  $^1H$  NMR,  $^{13}C$  NMR and HRMS of compound A21

A22

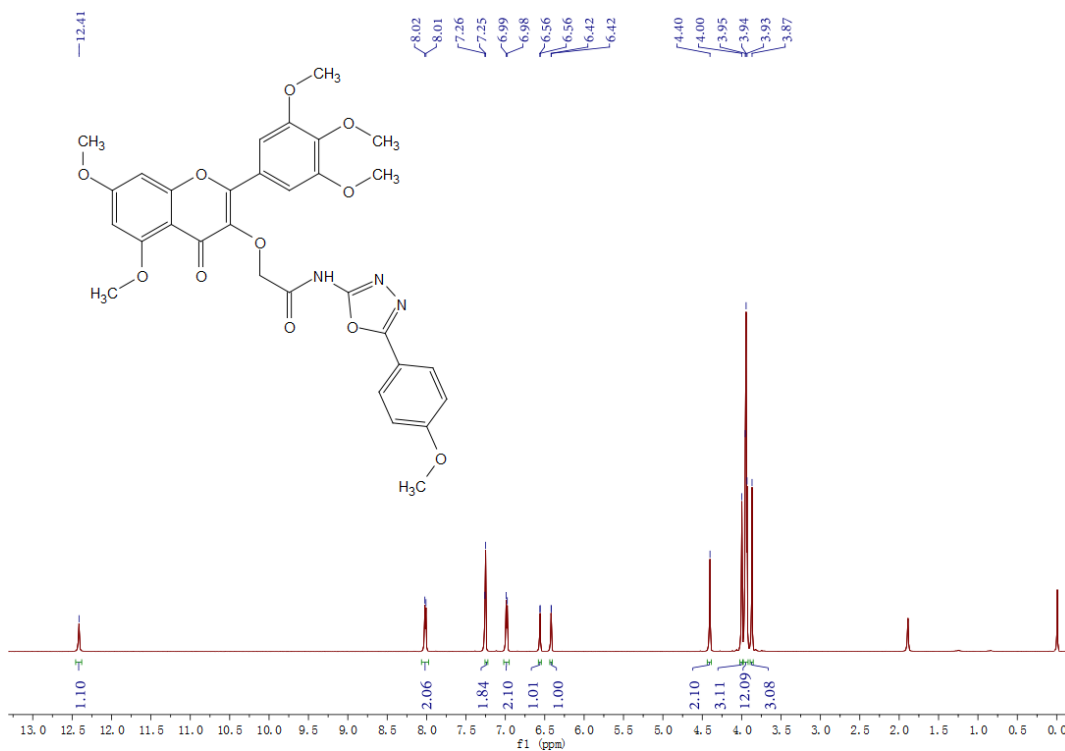

S31

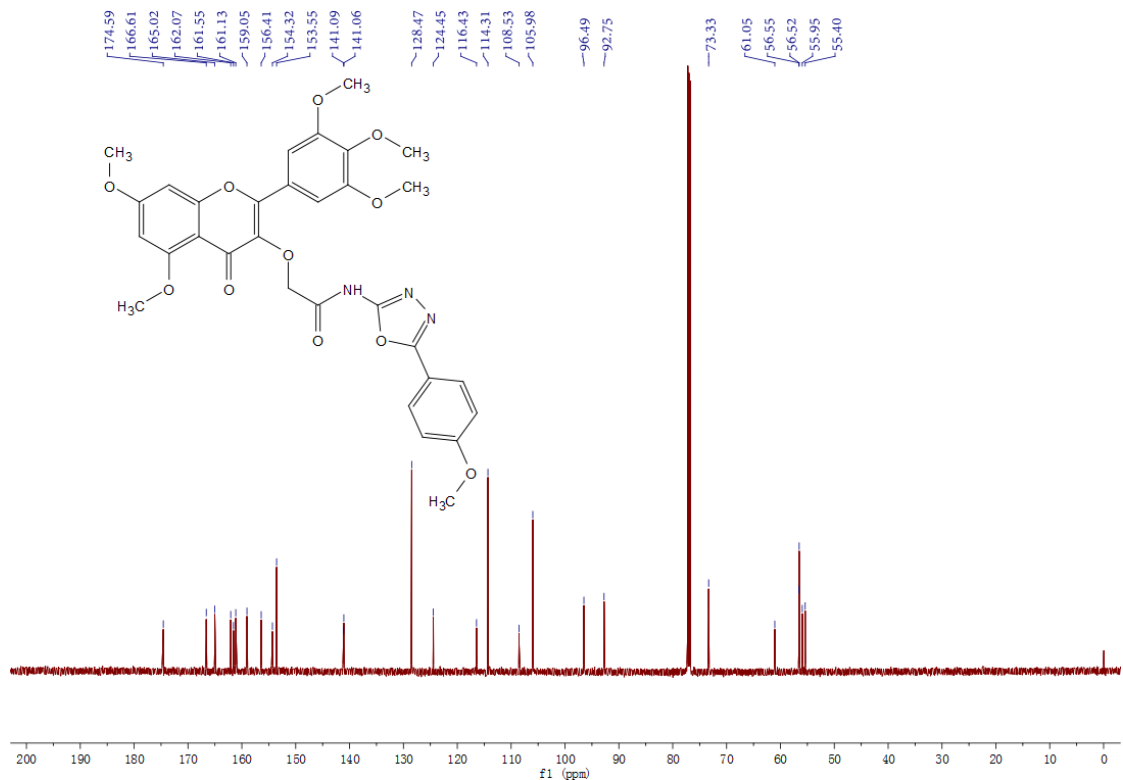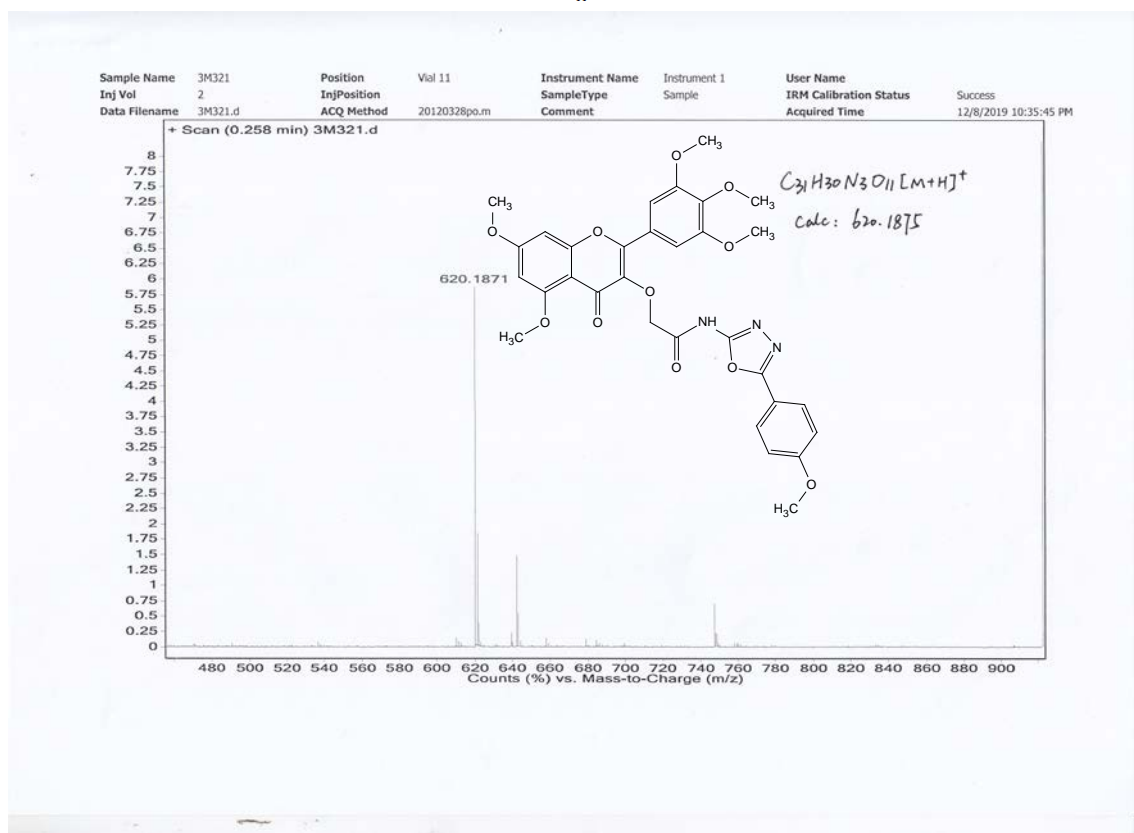

The spectrum of <sup>1</sup>H NMR, <sup>13</sup>C NMR and HRMS of compound A22

A23

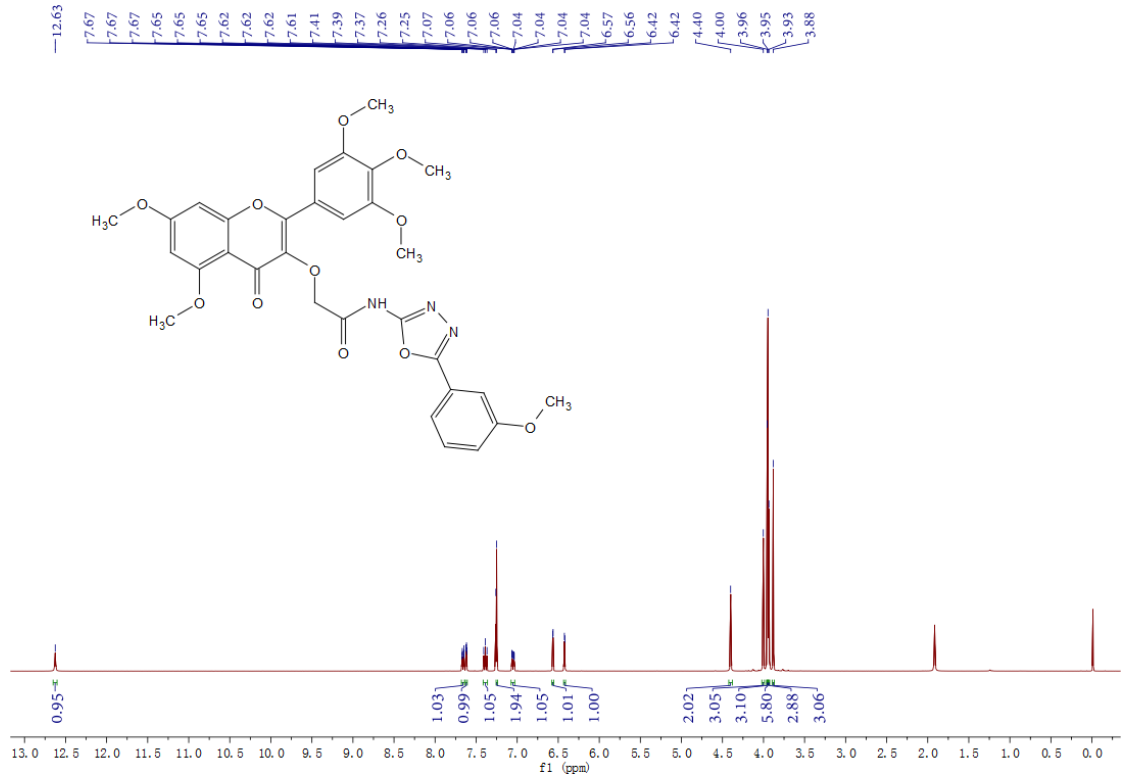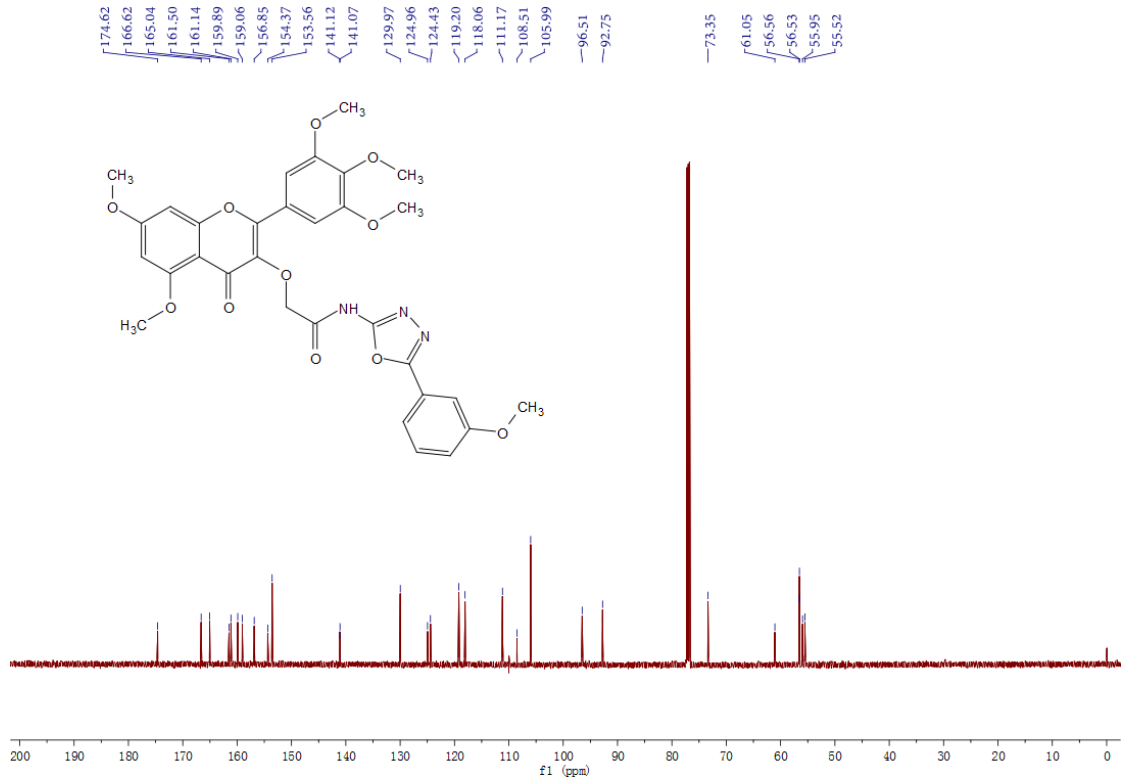

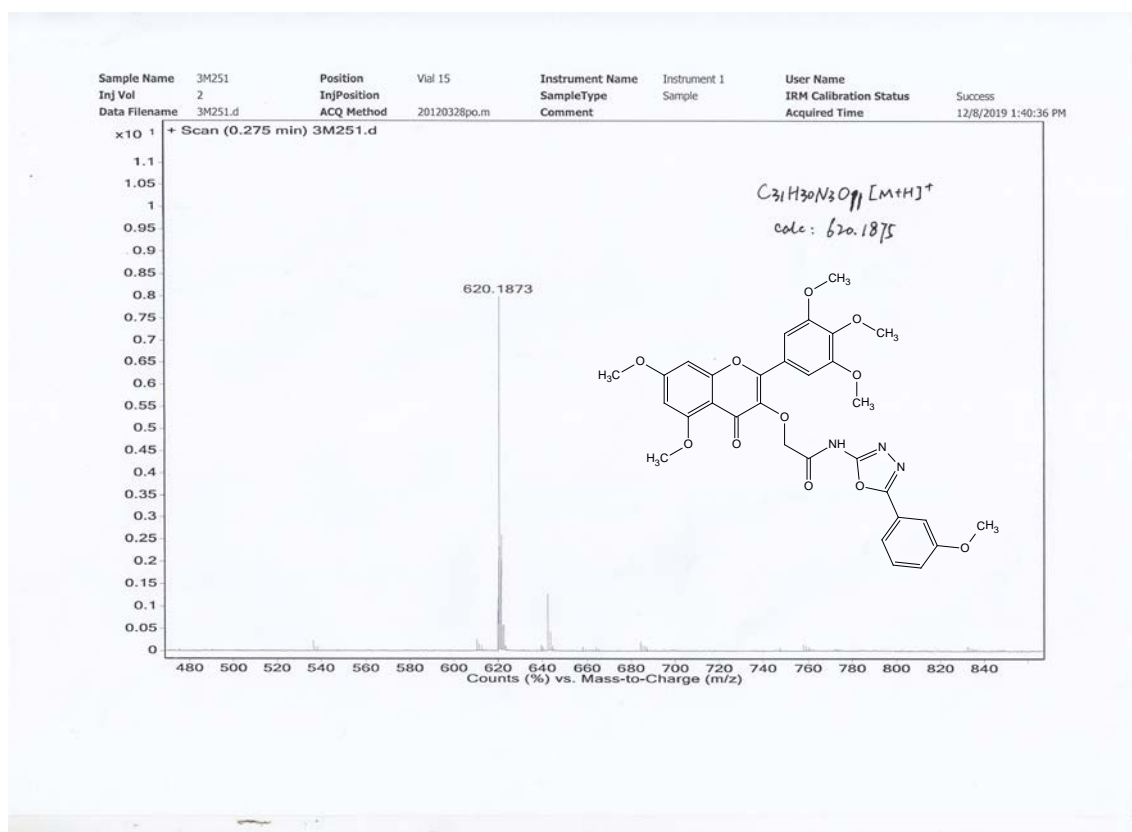

The spectrum of  $^1\text{H}$  NMR,  $^{13}\text{C}$  NMR and HRMS of compound A23

A24

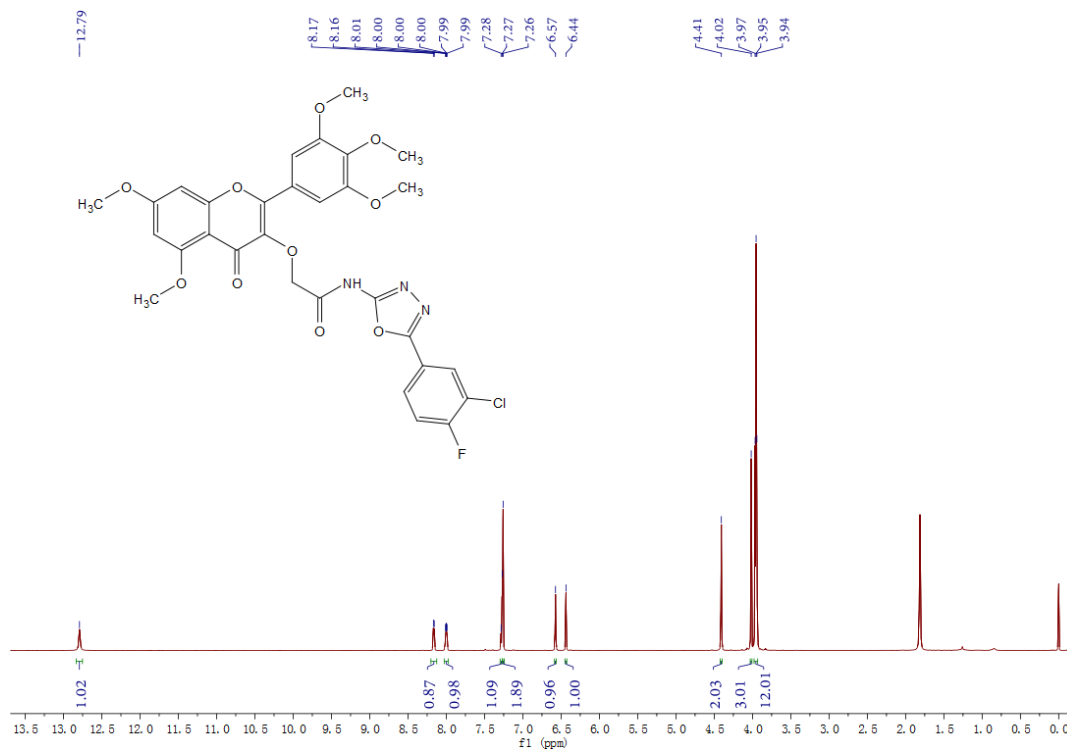

S34

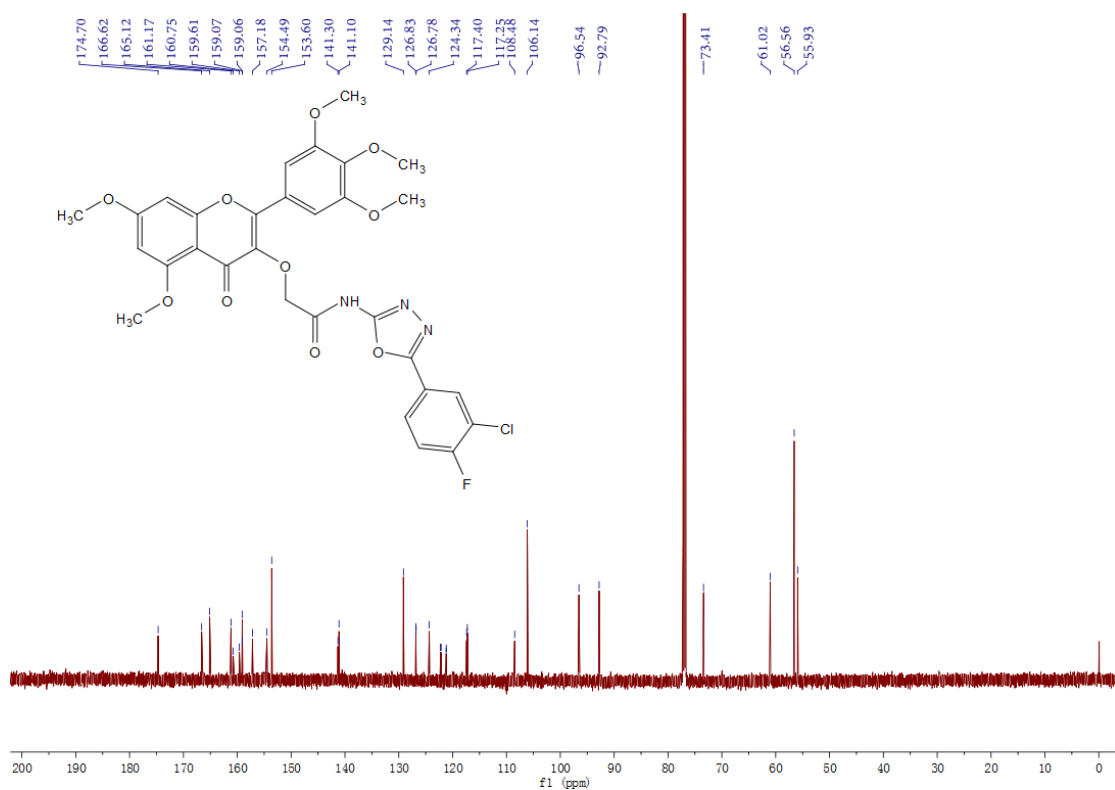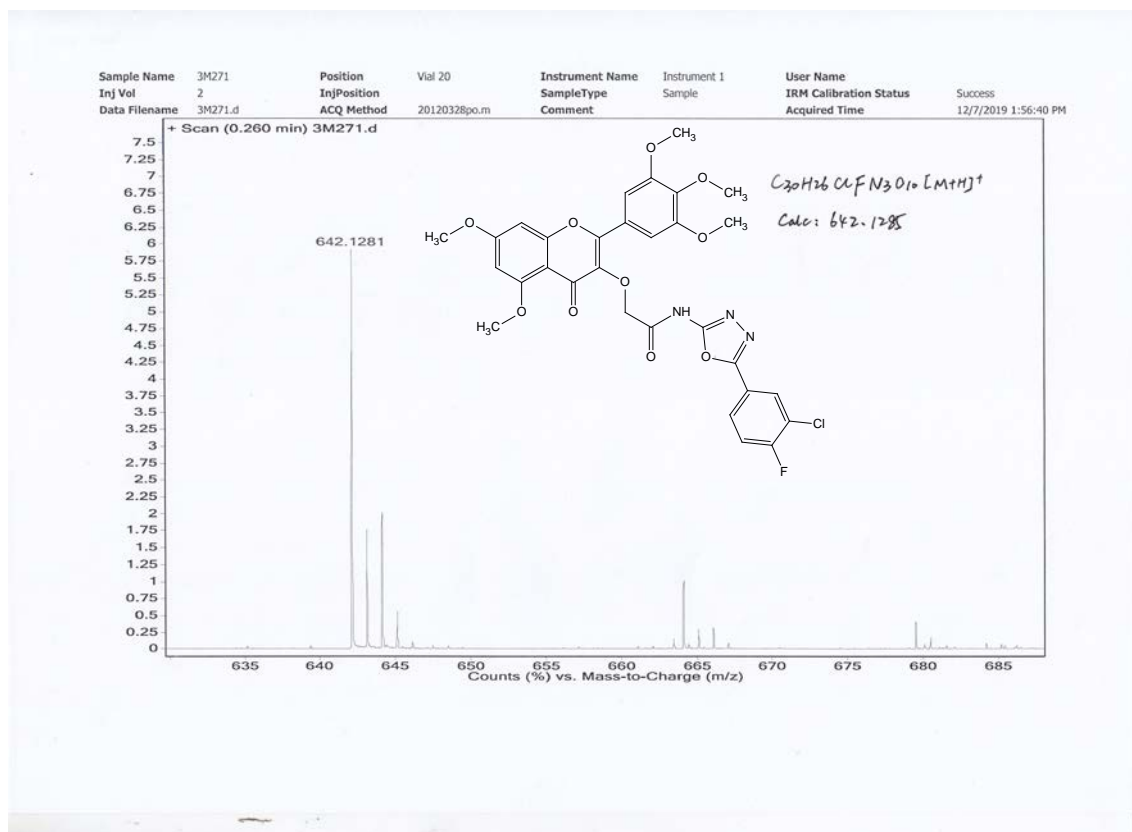

The spectrum of <sup>1</sup>H NMR, <sup>13</sup>C NMR and HRMS of compound A24



A25

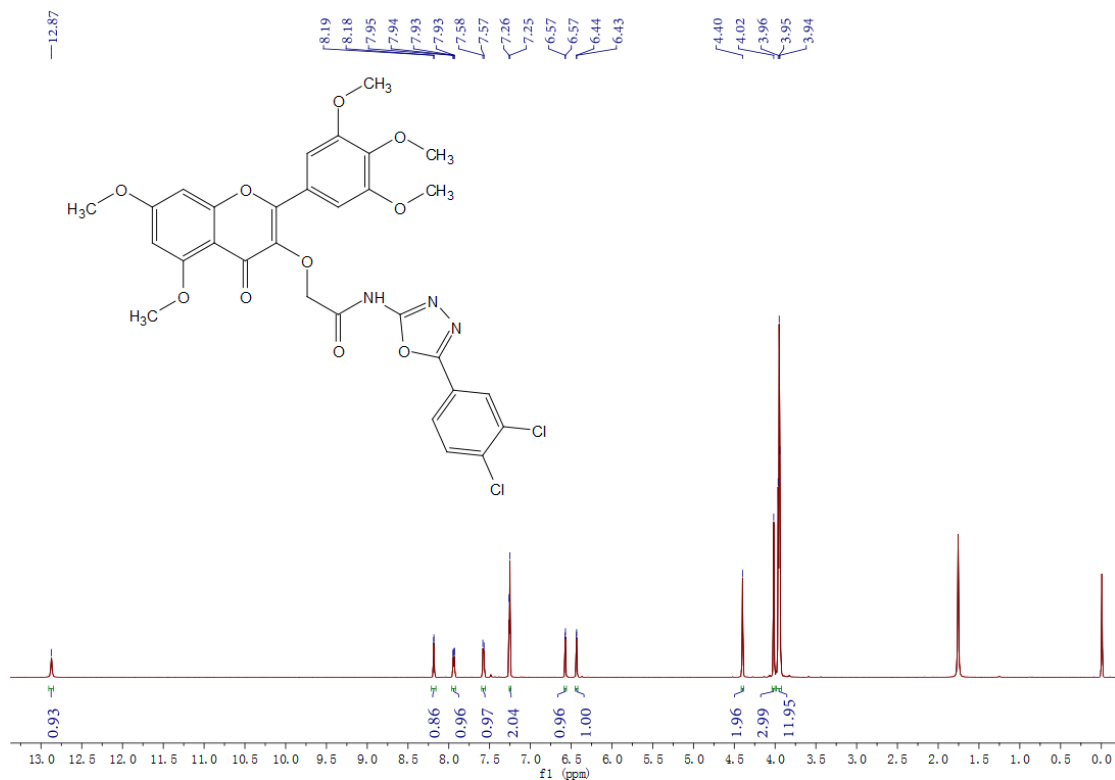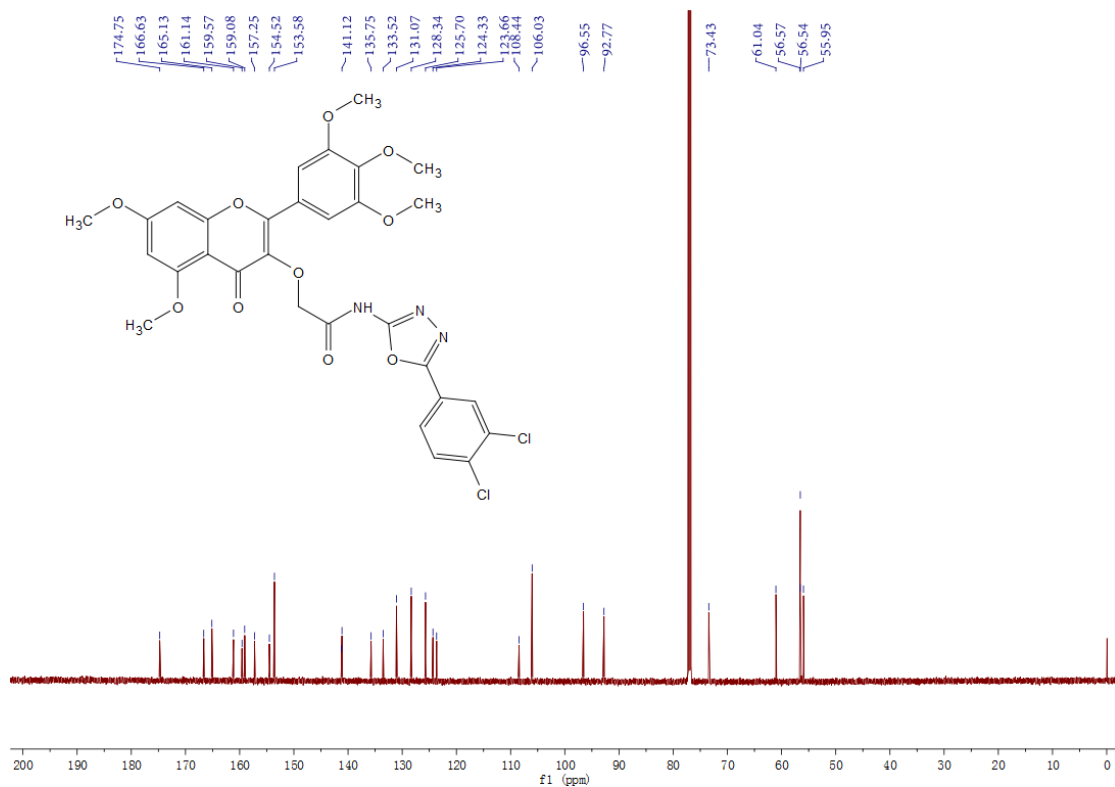

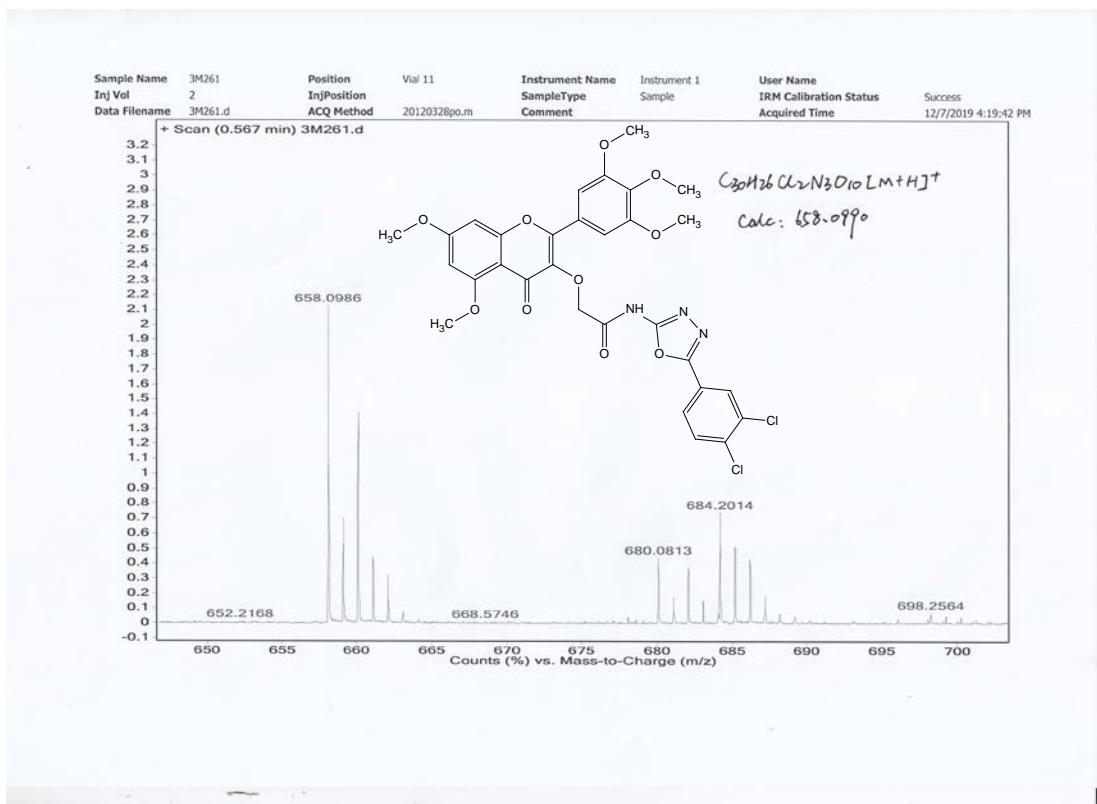

The spectrum of  $^1\text{H}$  NMR,  $^{13}\text{C}$  NMR and HRMS of compound A25

A26

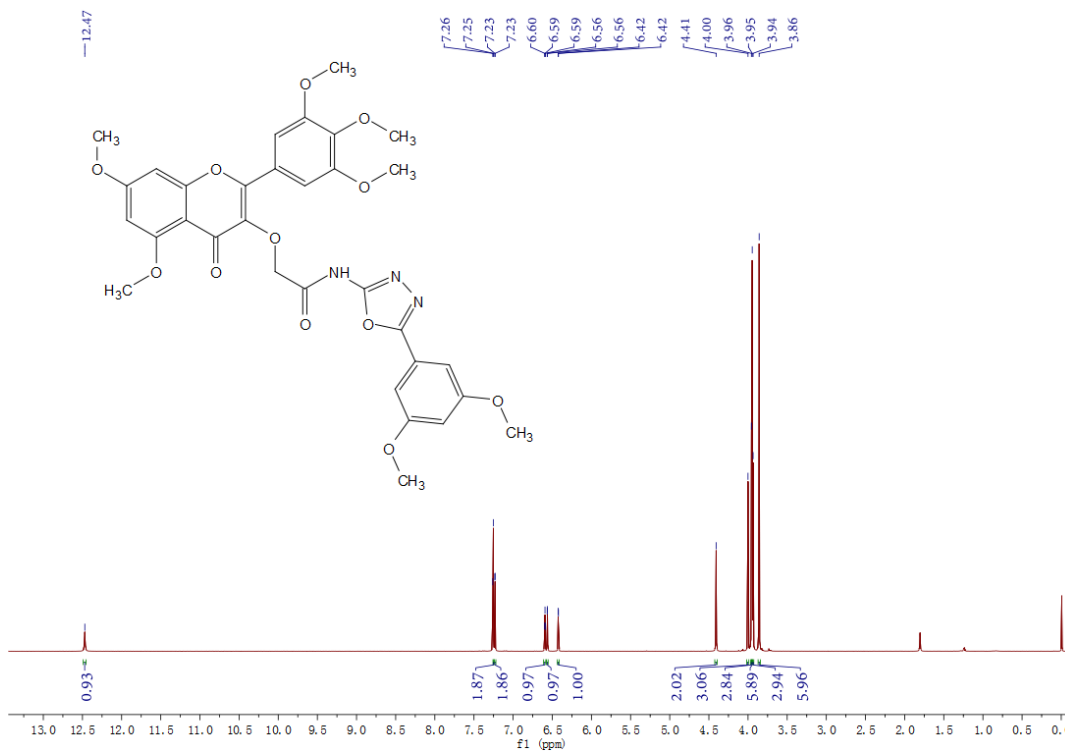

S37

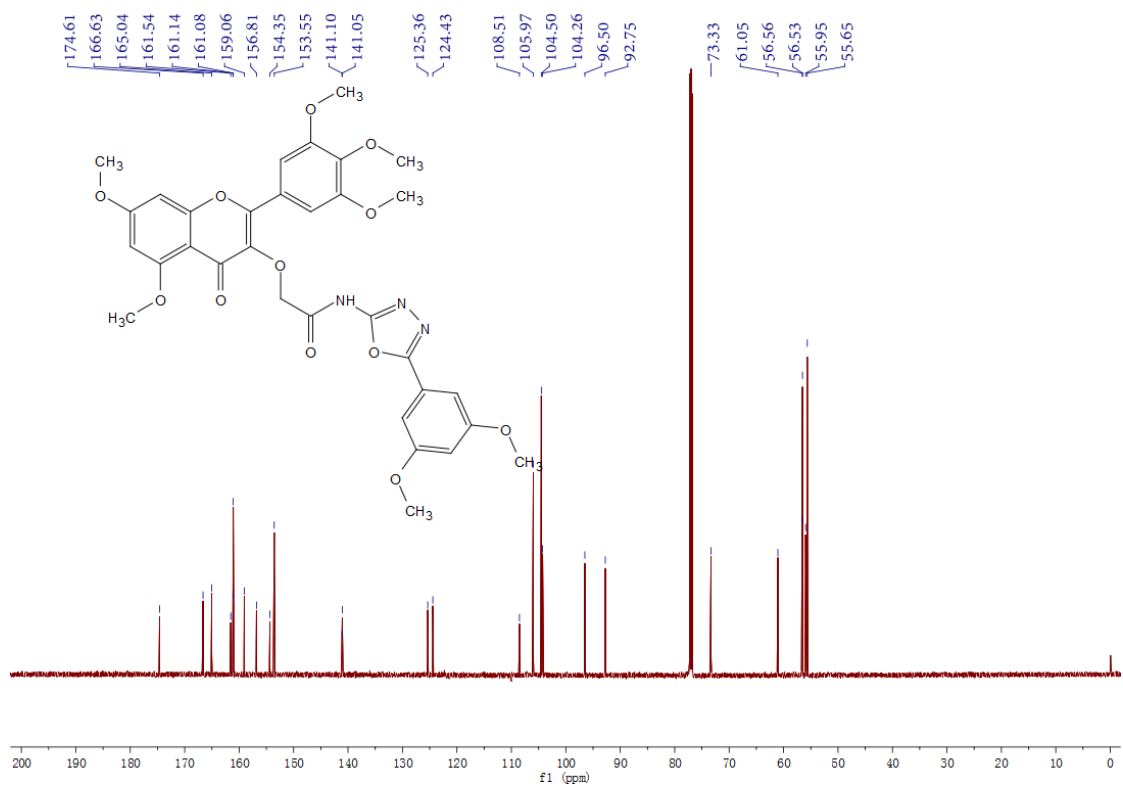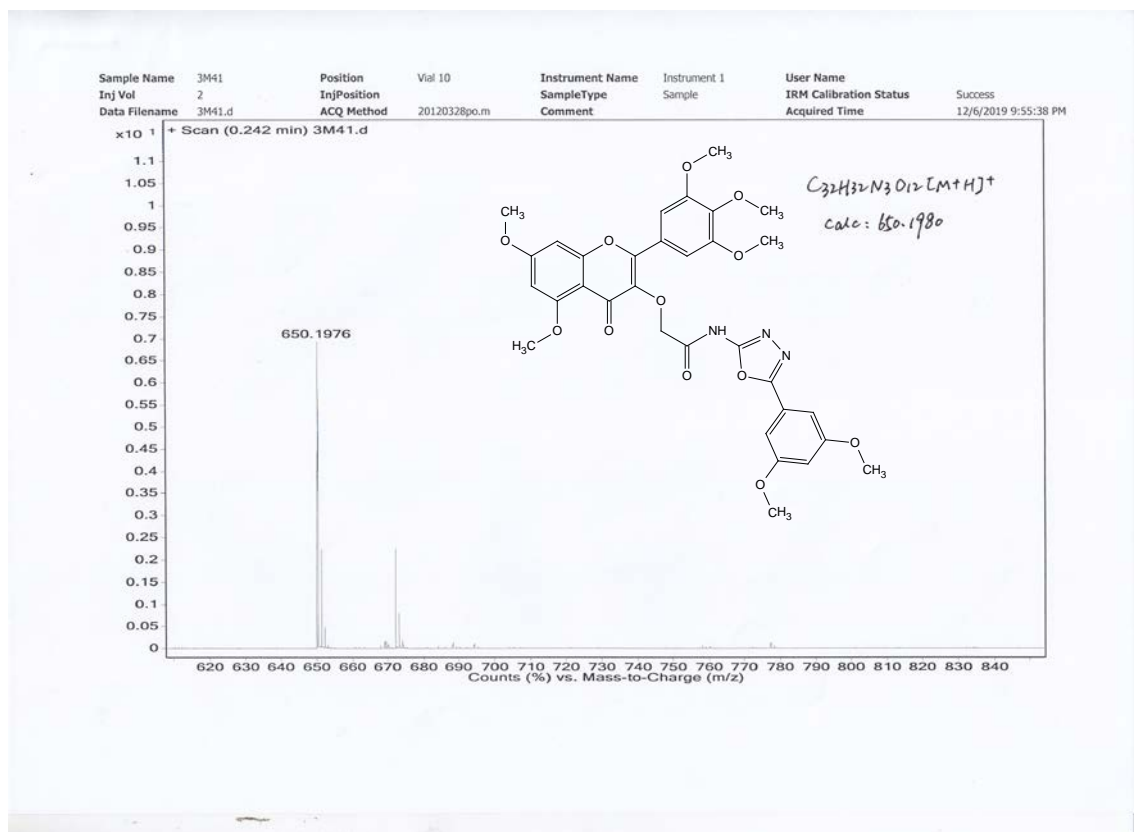

The spectrum of  $^1H$  NMR,  $^{13}C$  NMR and HRMS of compound A26

A27

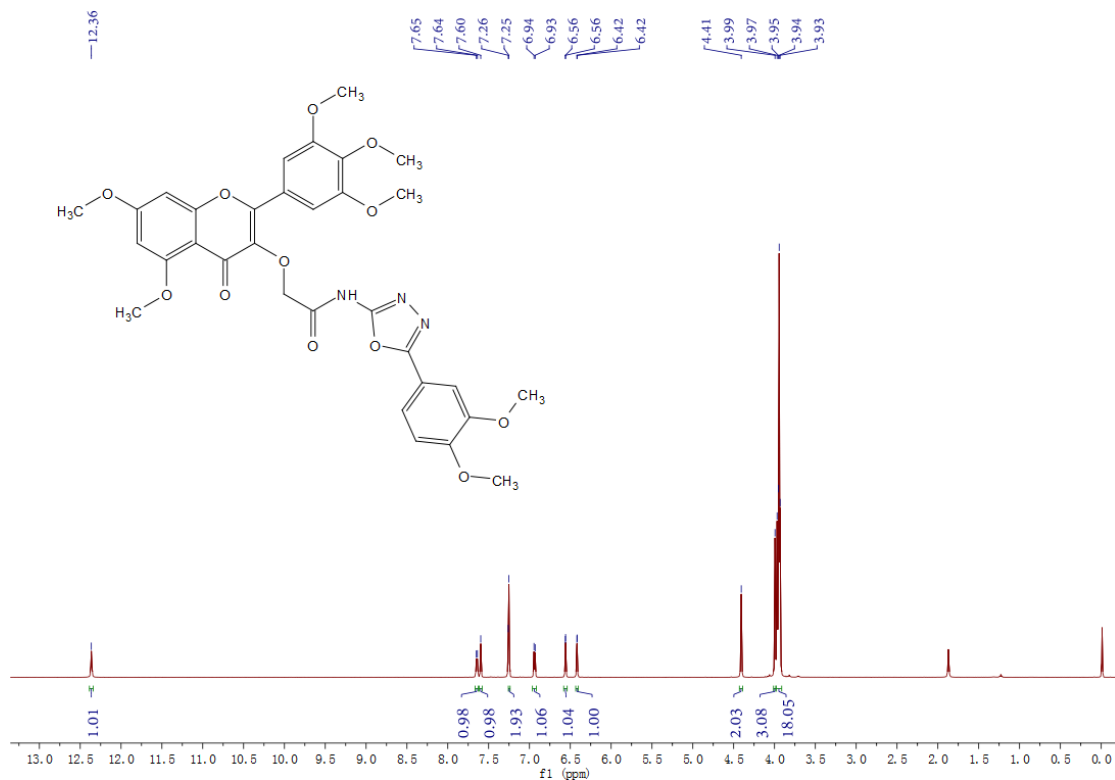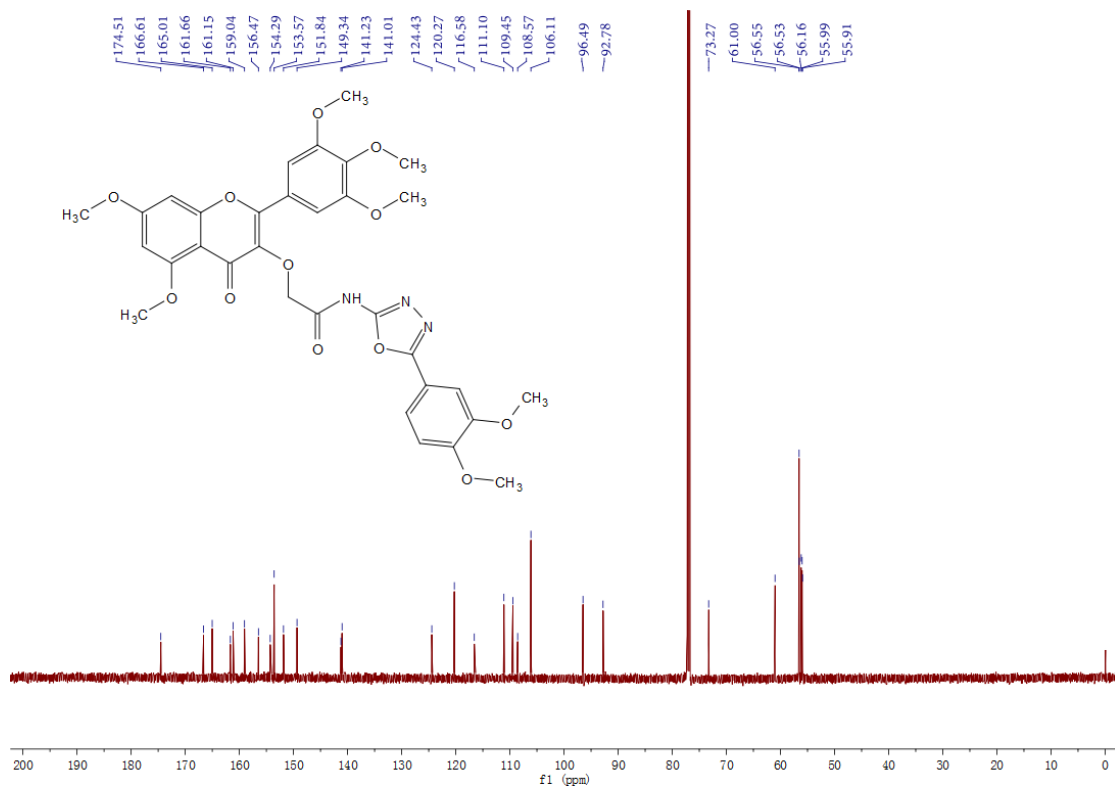

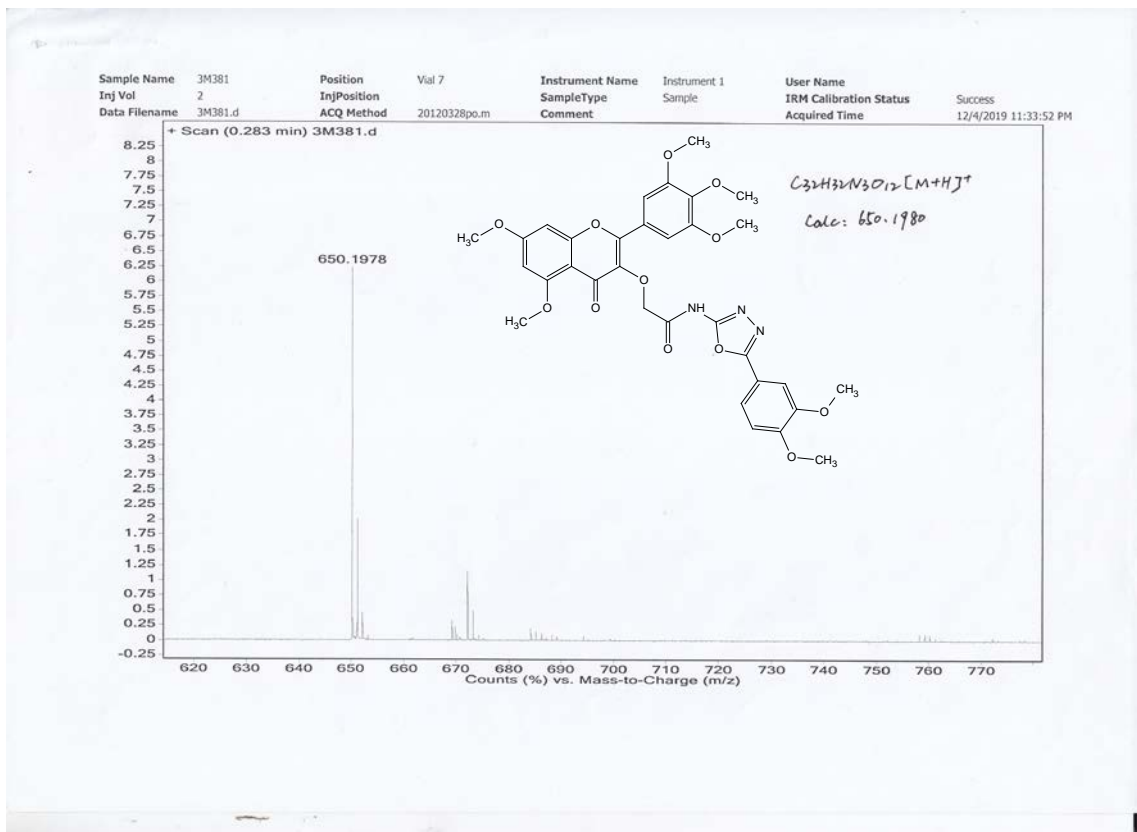

The spectrum of  $^1H$  NMR,  $^{13}C$  NMR and HRMS of compound A27

A28

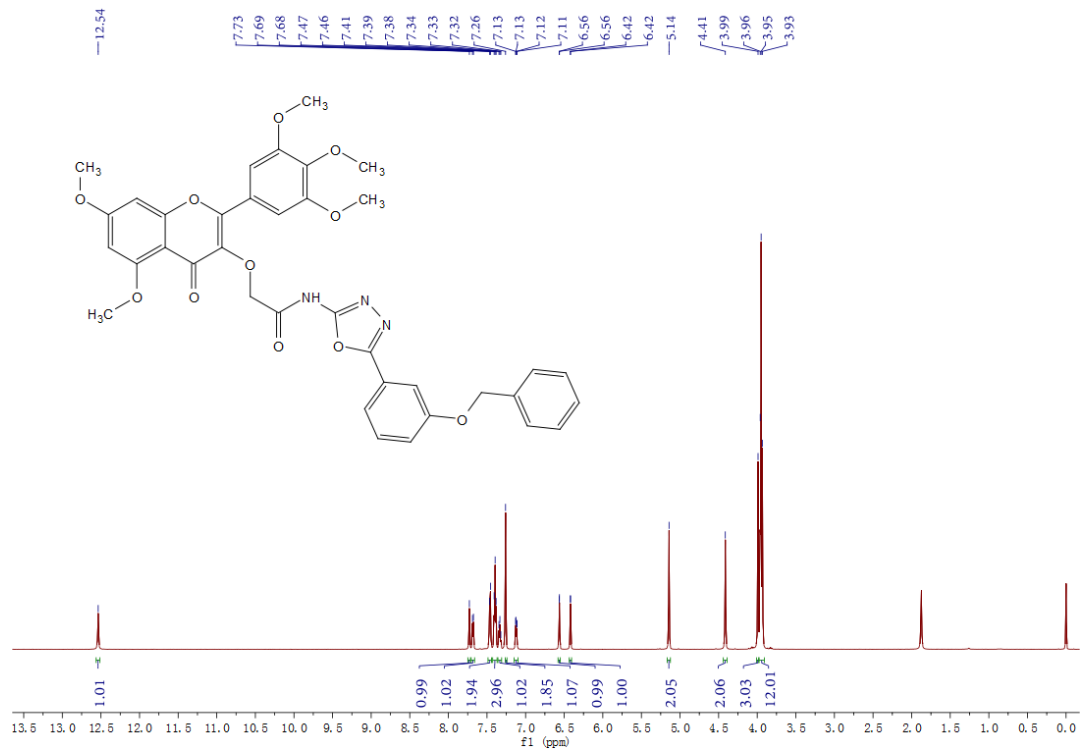

S40

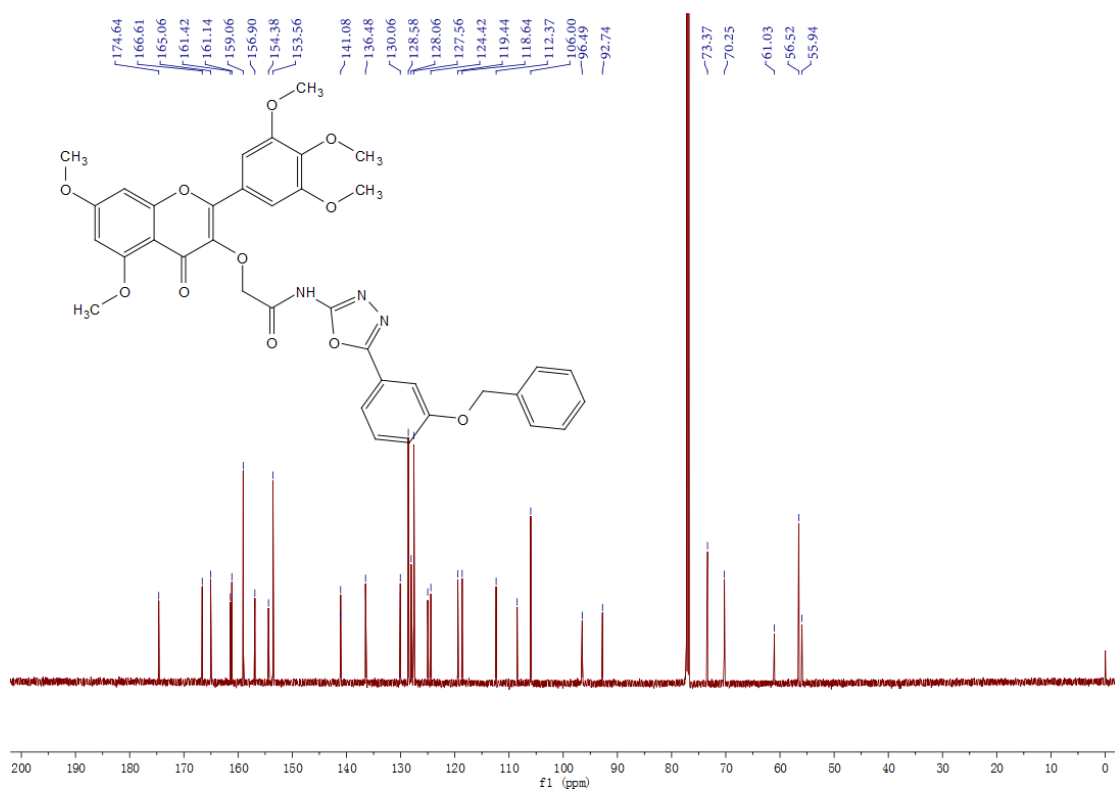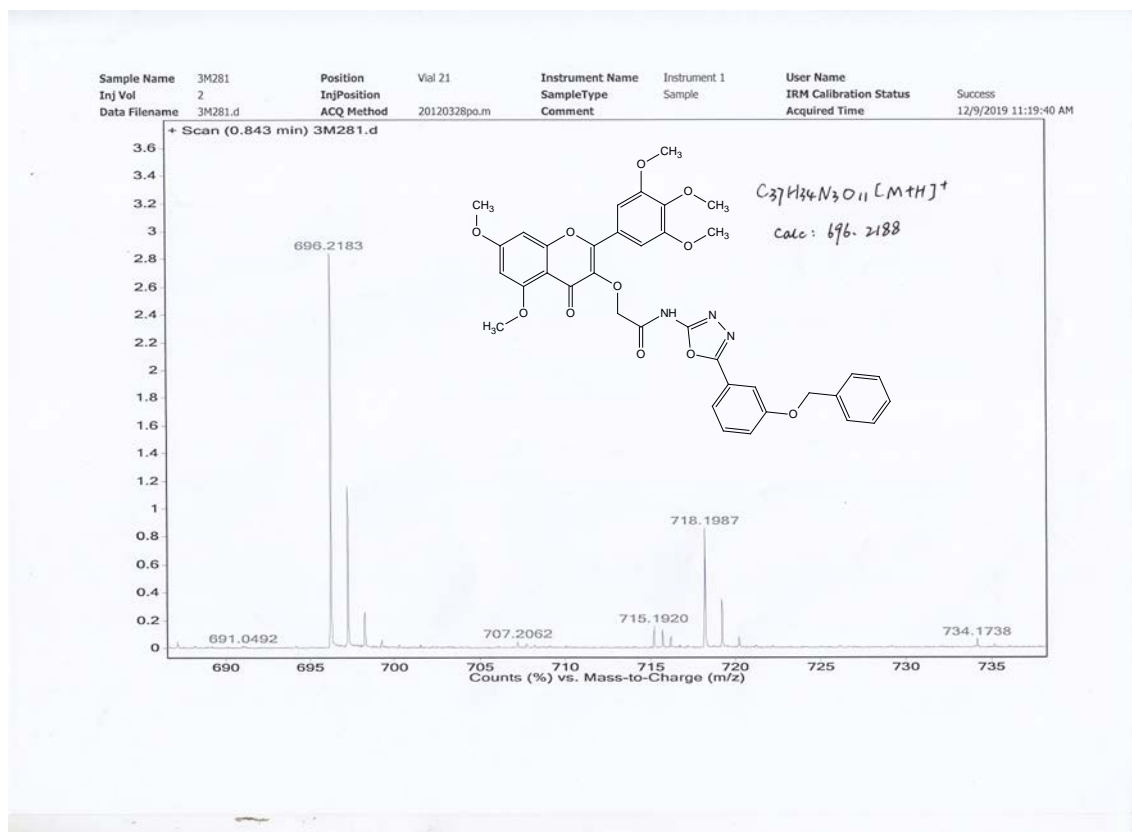

The spectrum of  $^1\text{H}$  NMR,  $^{13}\text{C}$  NMR and HRMS of compound A28

A29

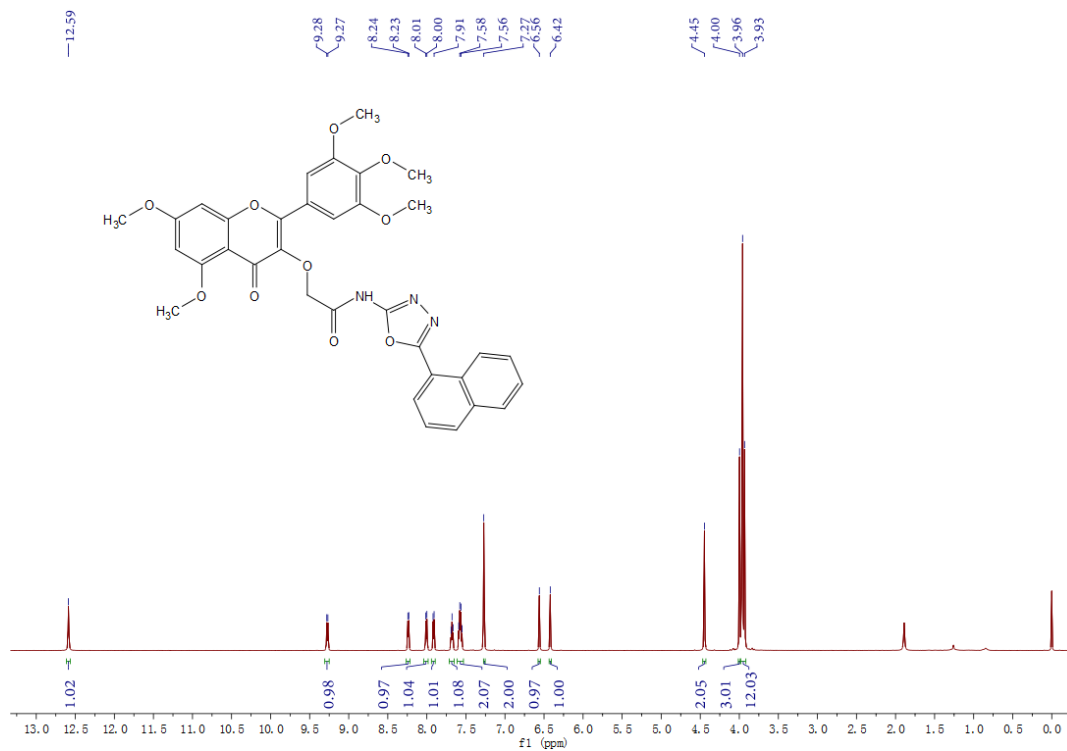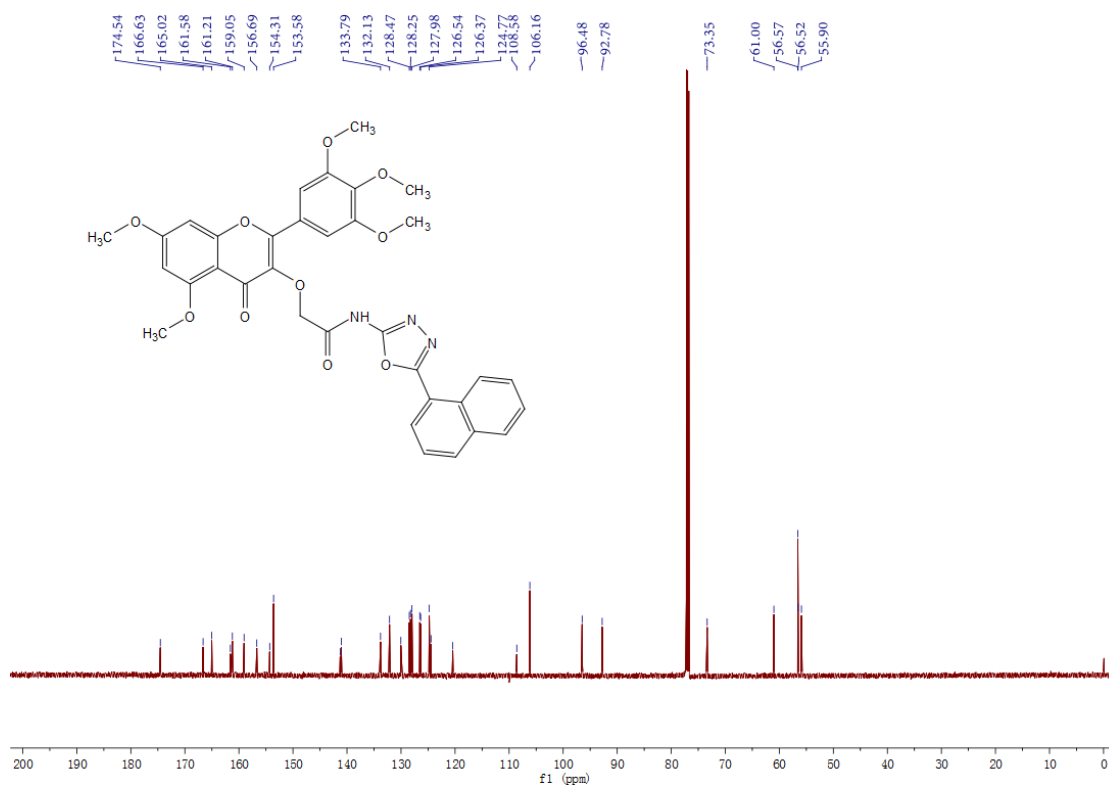

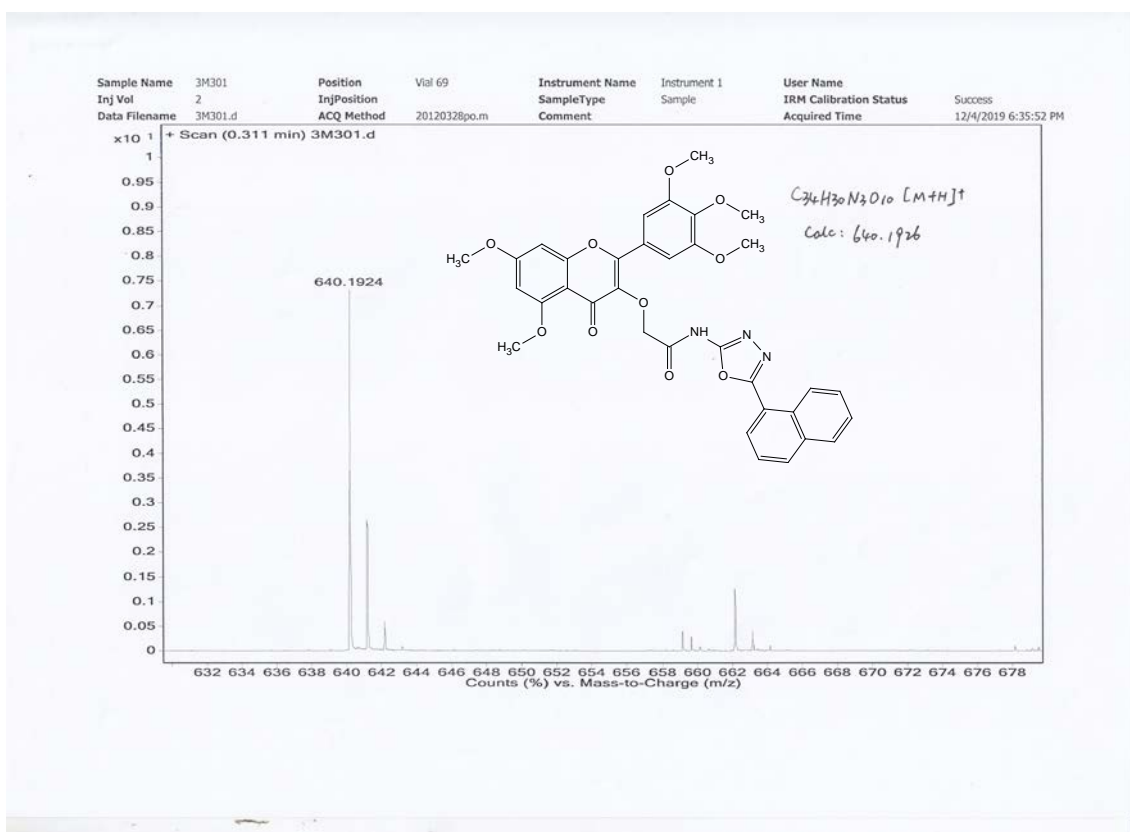

The spectrum of  $^1H$  NMR,  $^{13}C$  NMR and HRMS of compound A29

A30

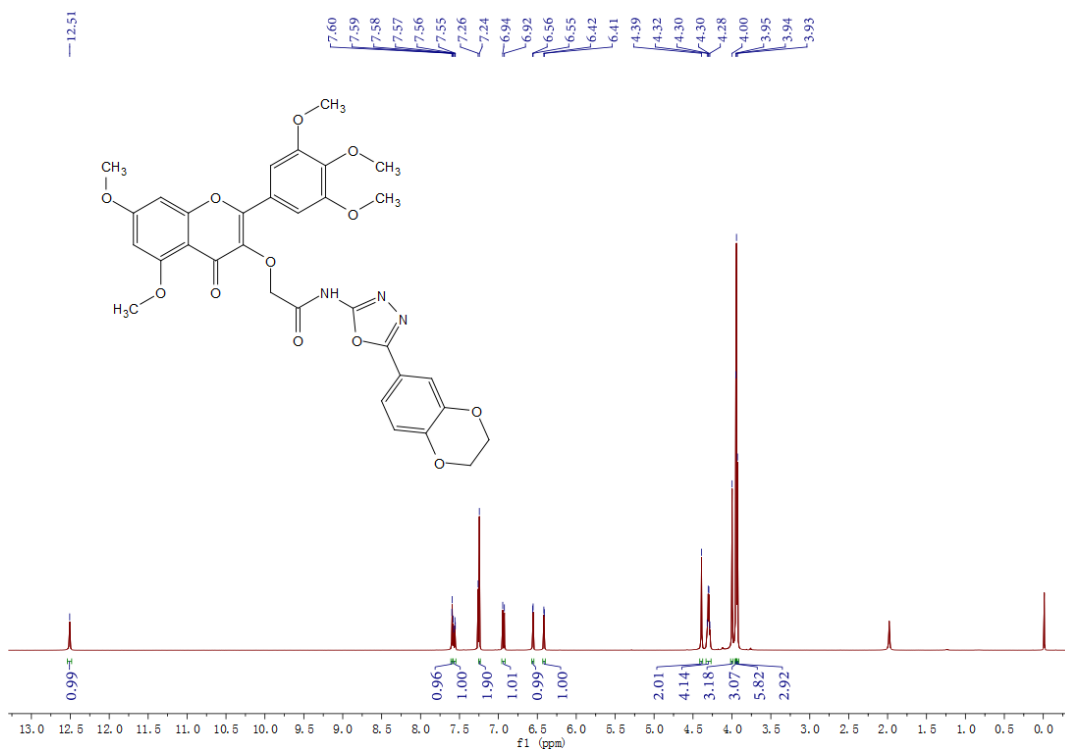

S43



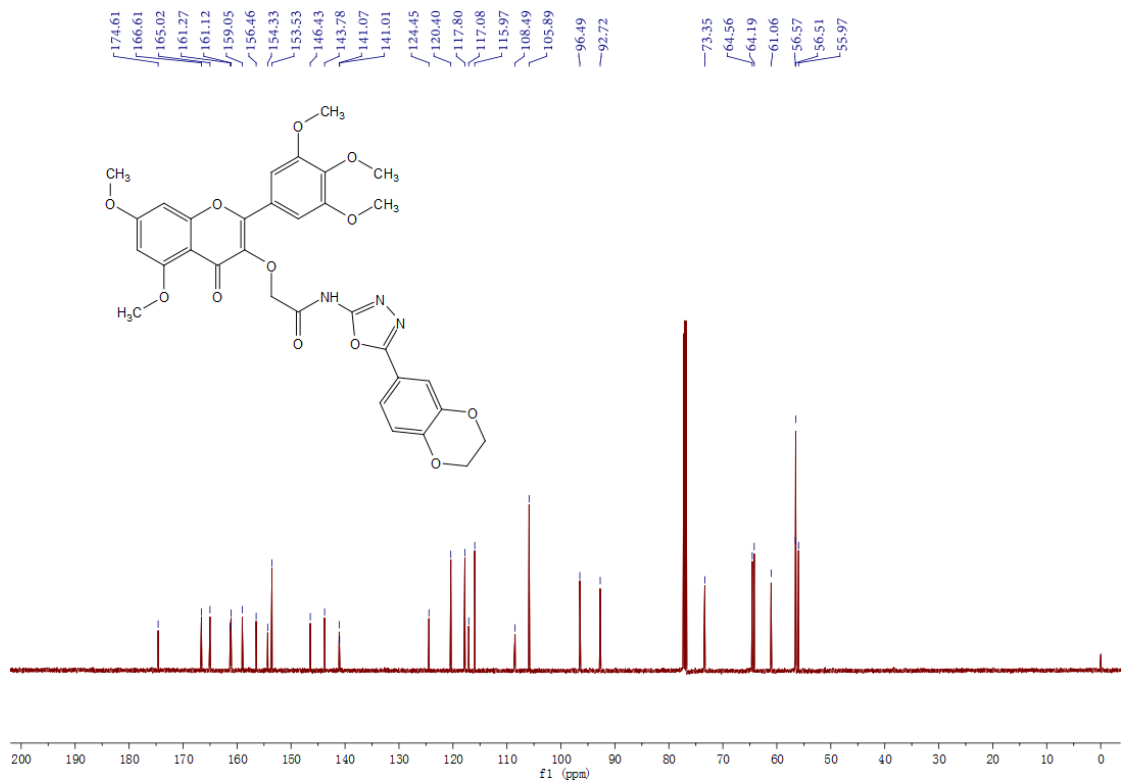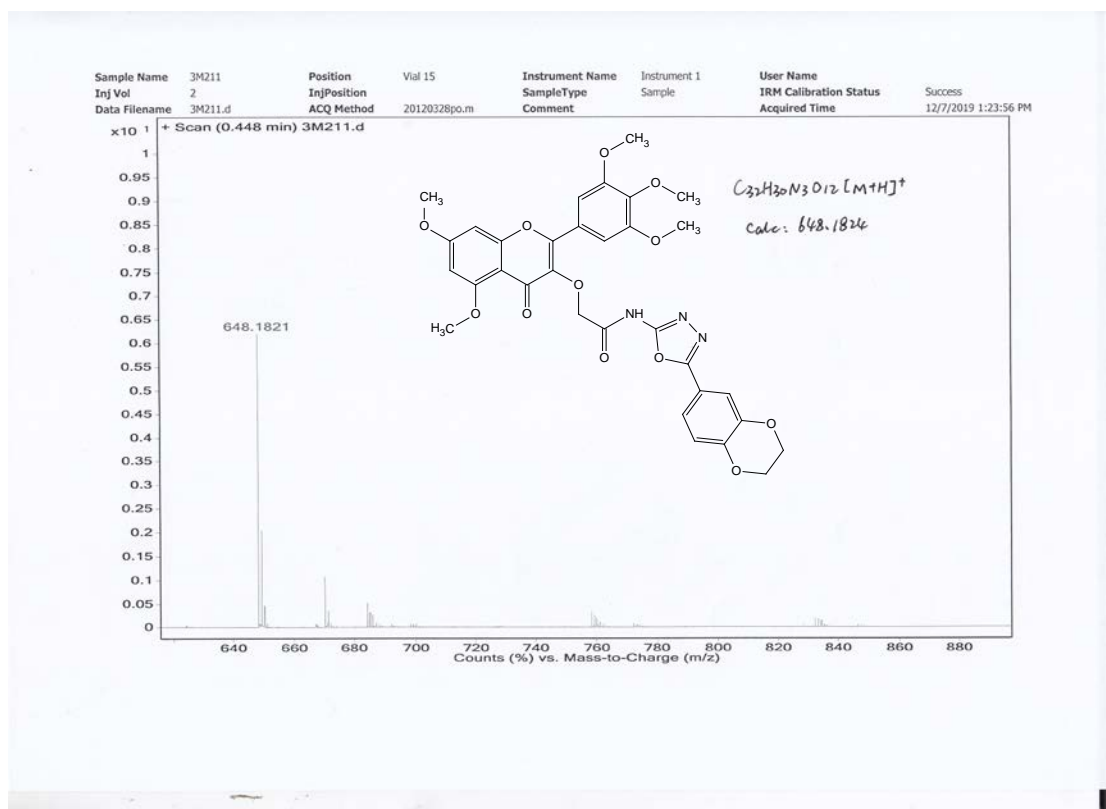

The spectrum of  $^1\text{H}$  NMR,  $^{13}\text{C}$  NMR and HRMS of compound A30

# A31

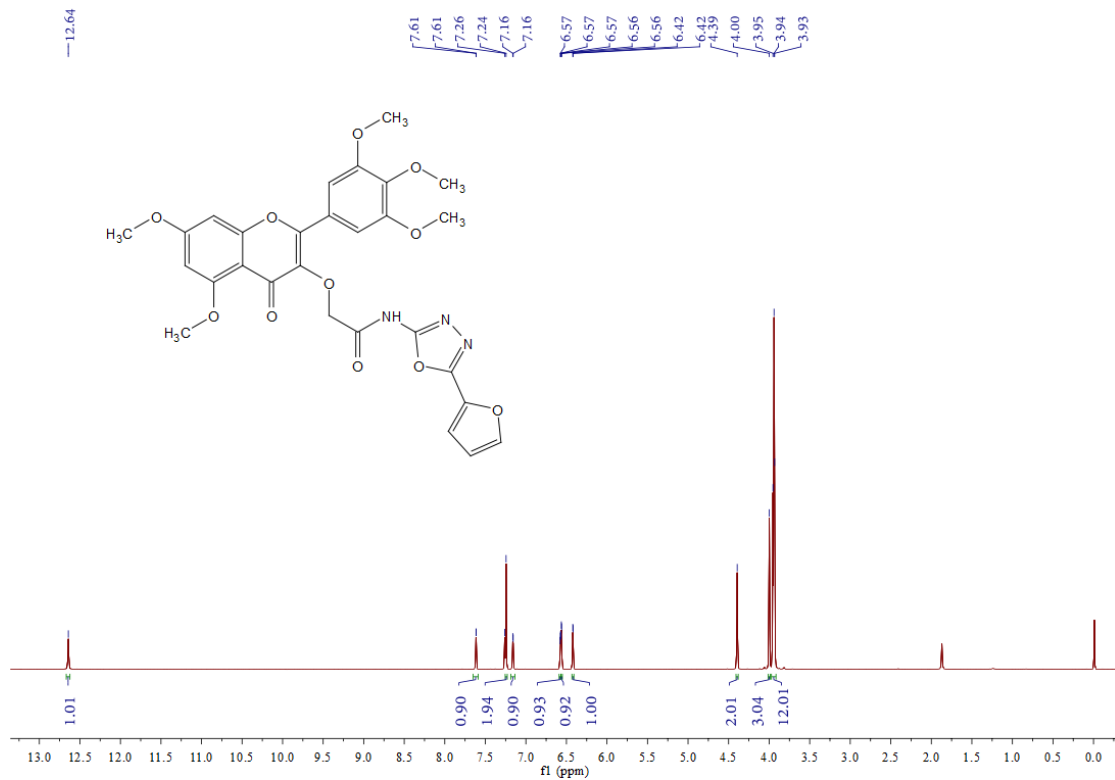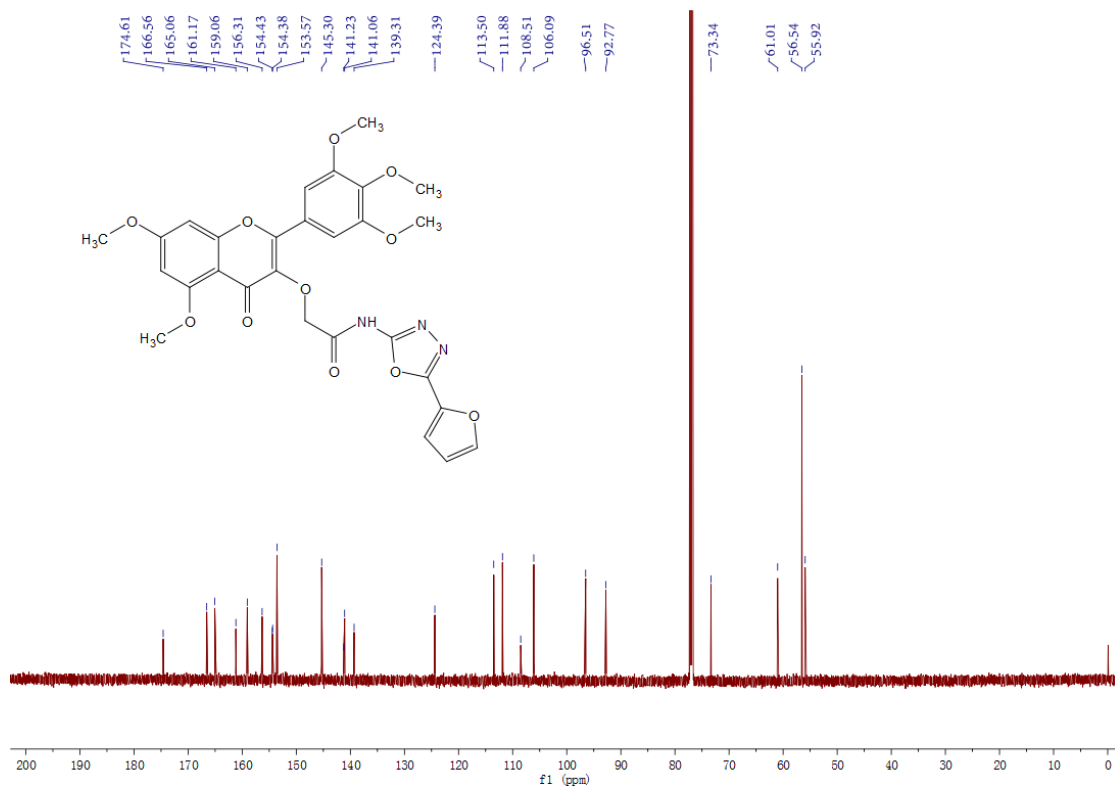

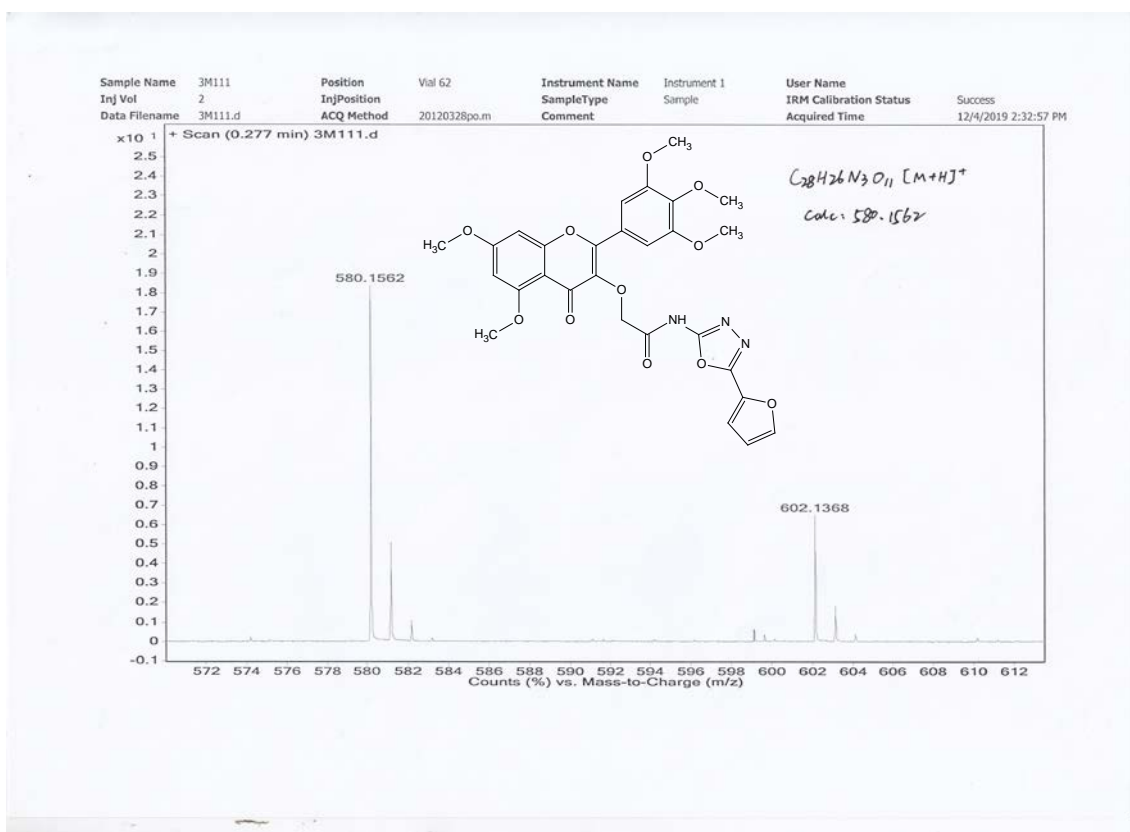

The spectrum of  $^1H$  NMR,  $^{13}C$  NMR and HRMS of compound A31

A32

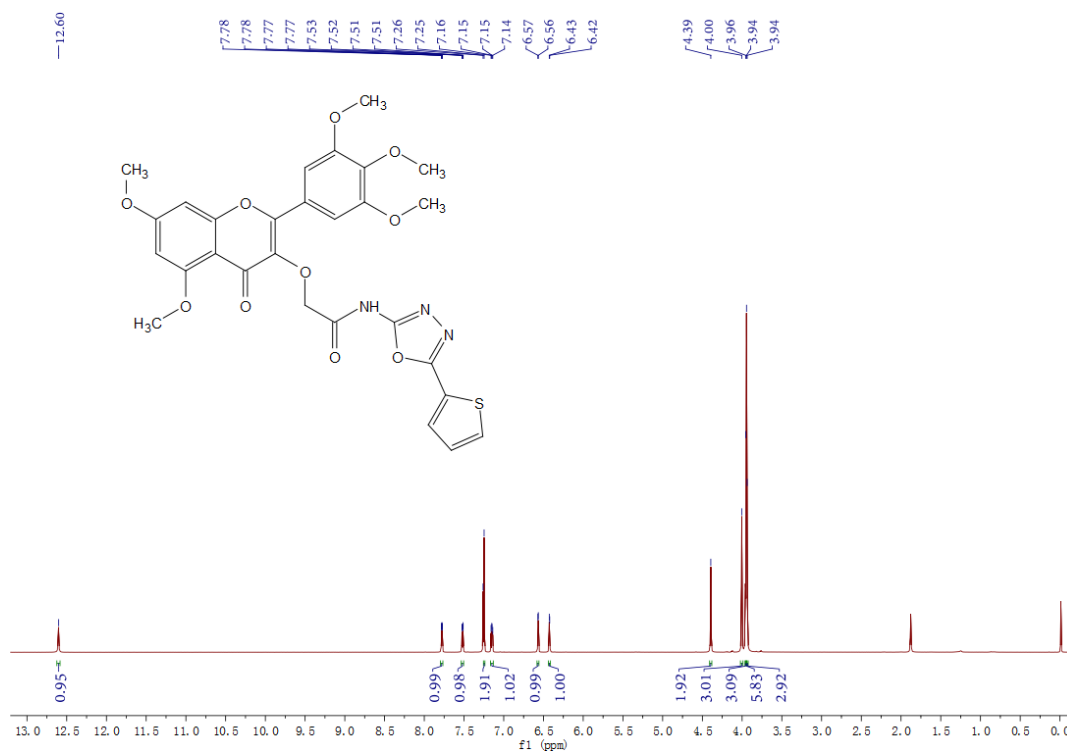

S46

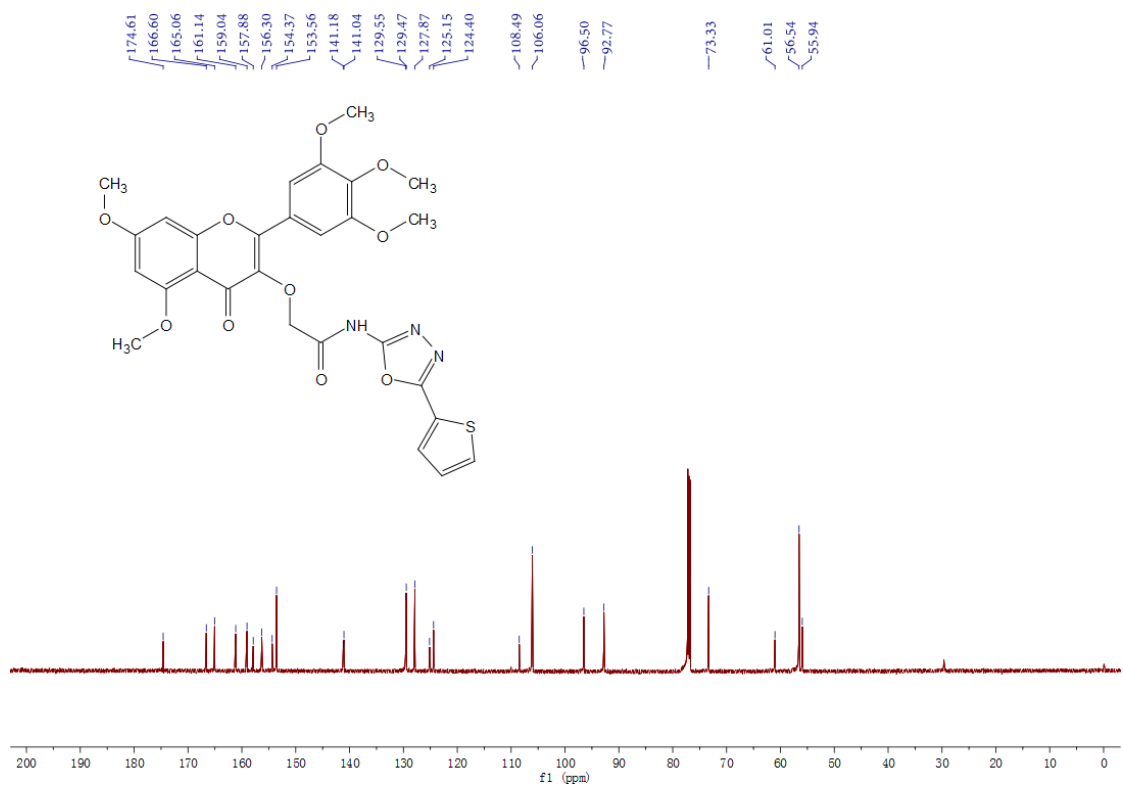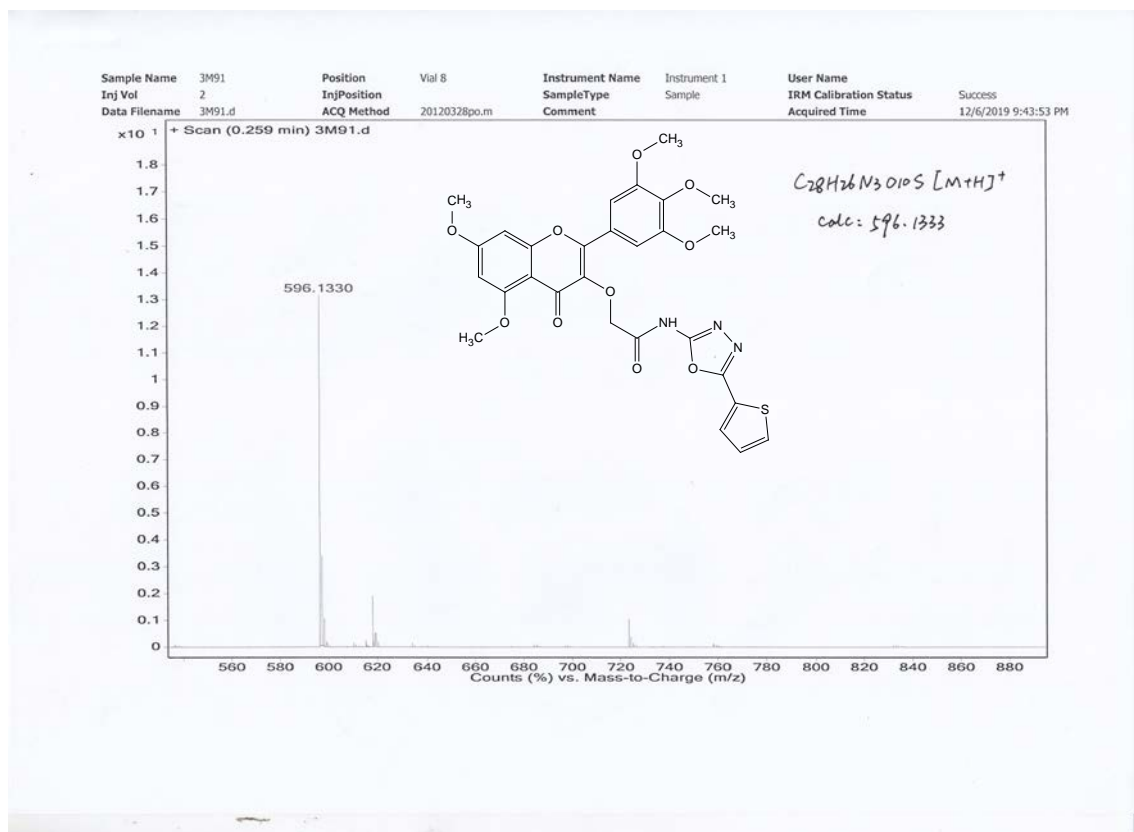

The spectrum of  $^1\text{H}$  NMR,  $^{13}\text{C}$  NMR and HRMS of compound A32

A33

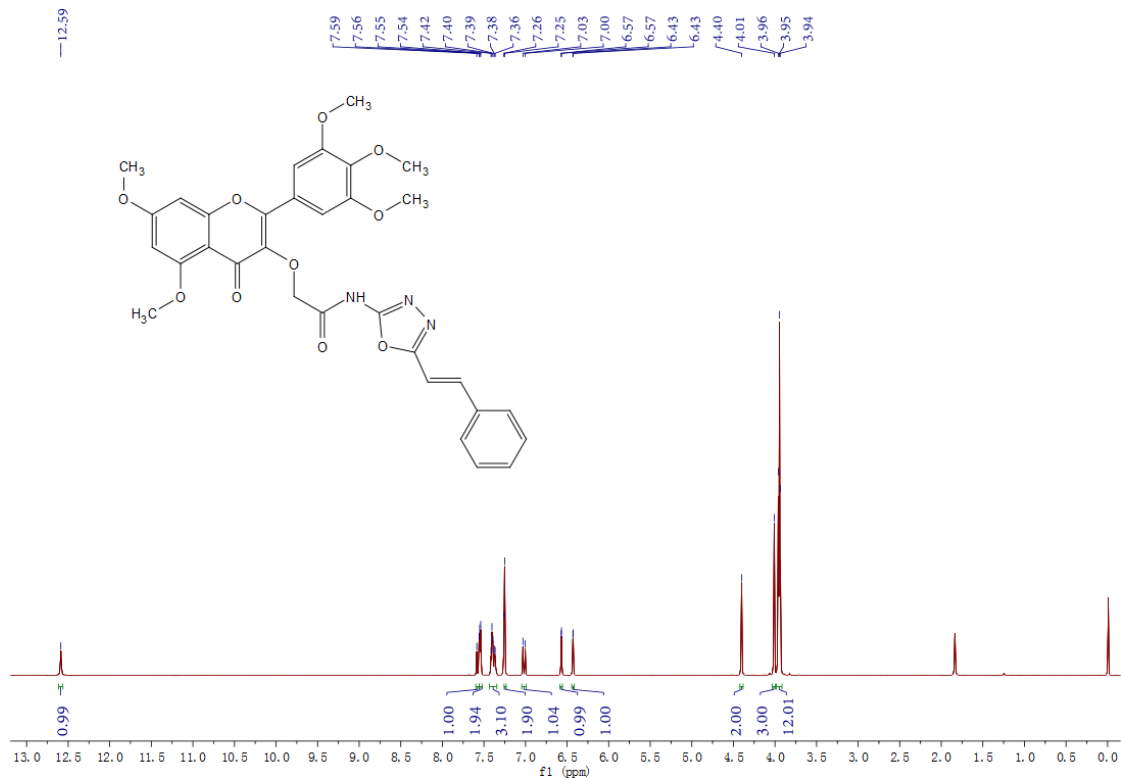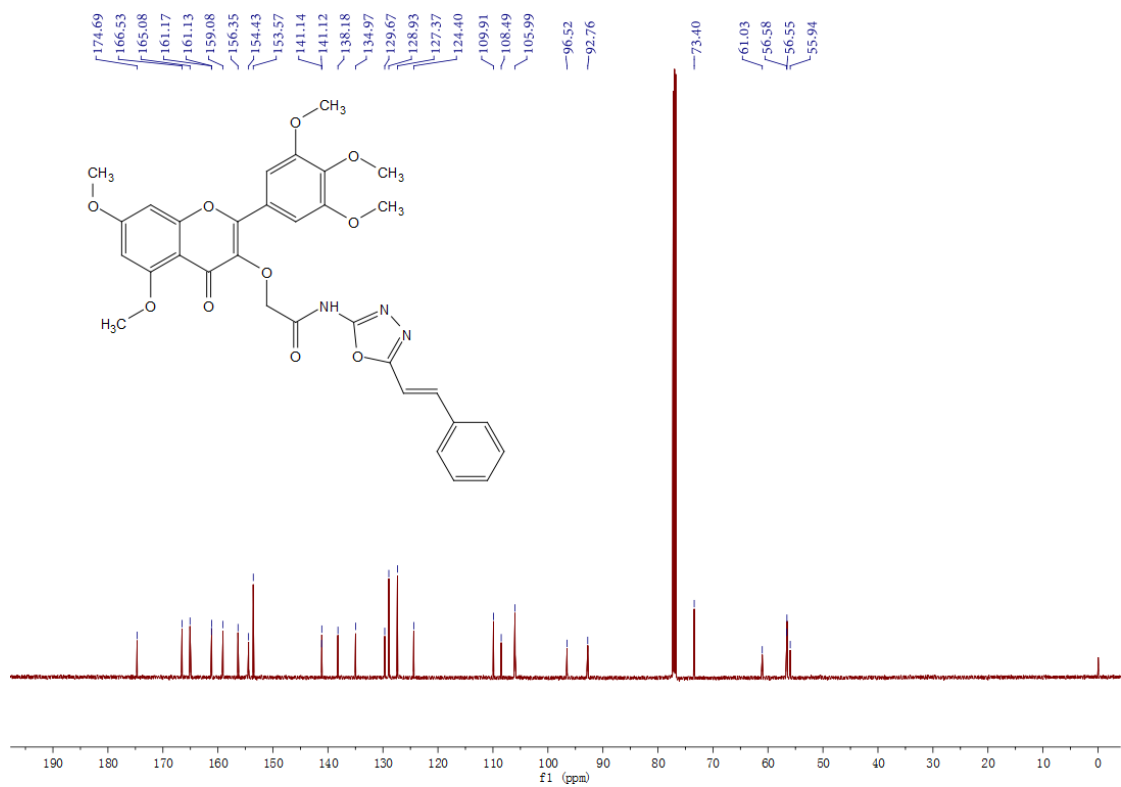

S48

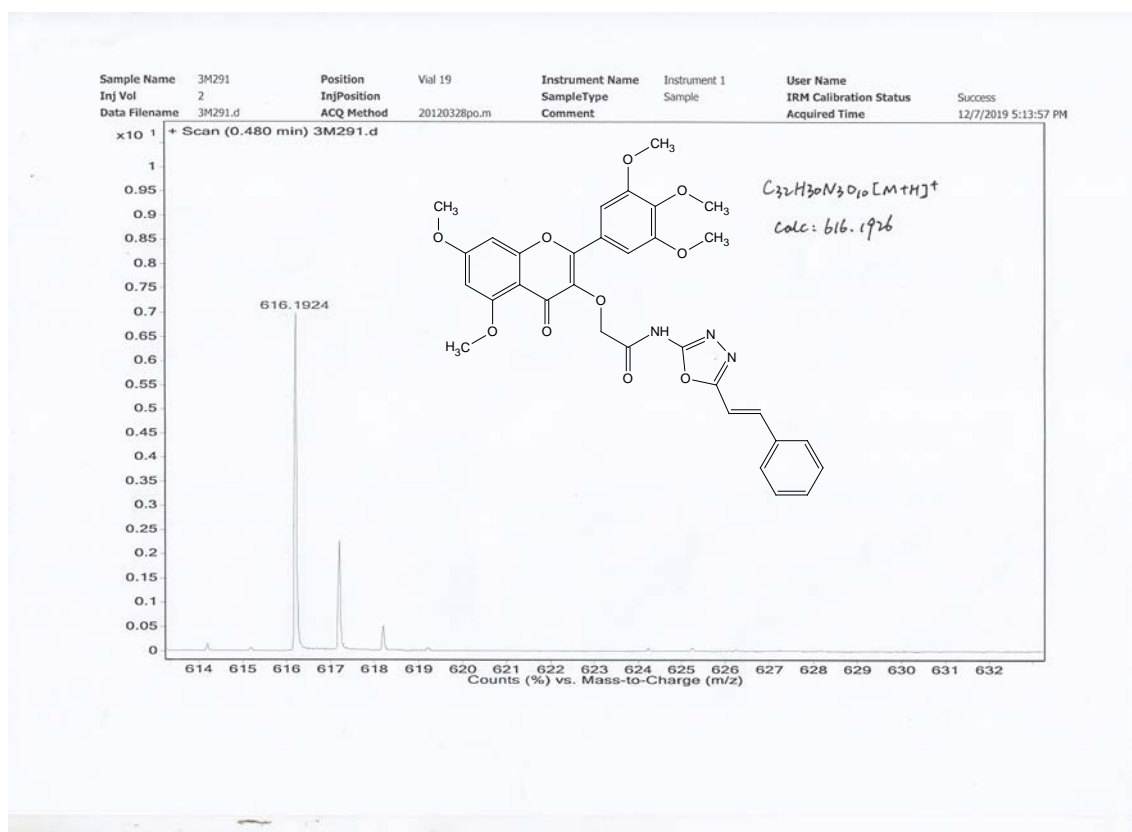

The spectrum of  $^1H$  NMR,  $^{13}C$  NMR and HRMS of compound A33

B1

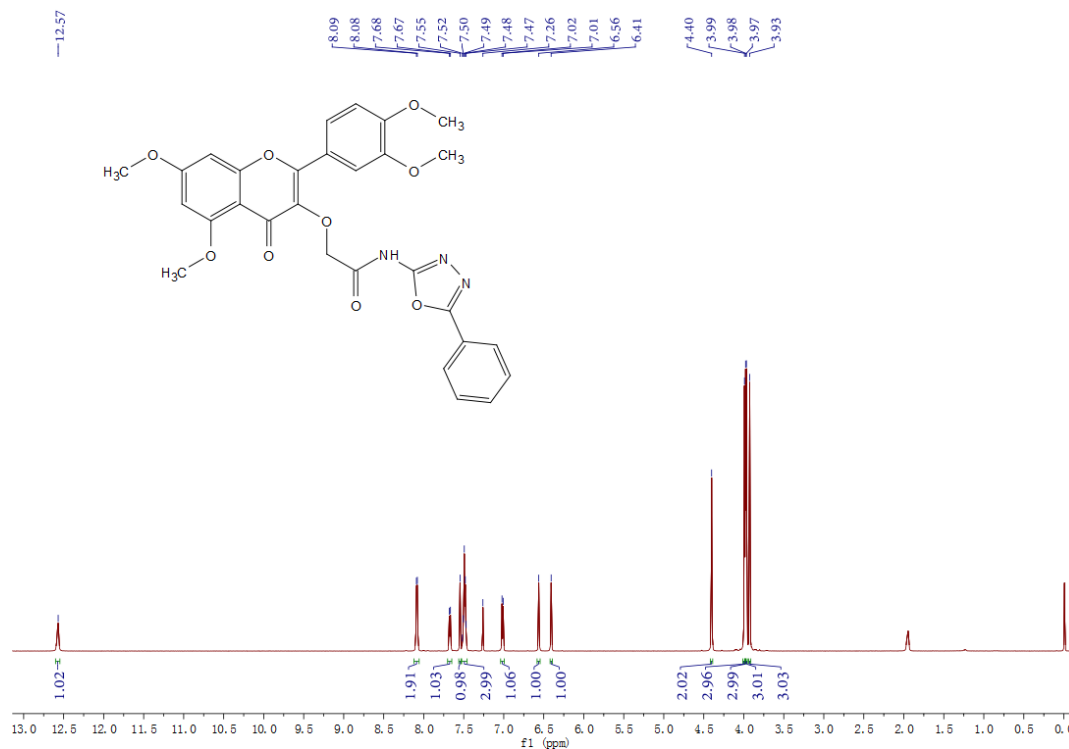

S49

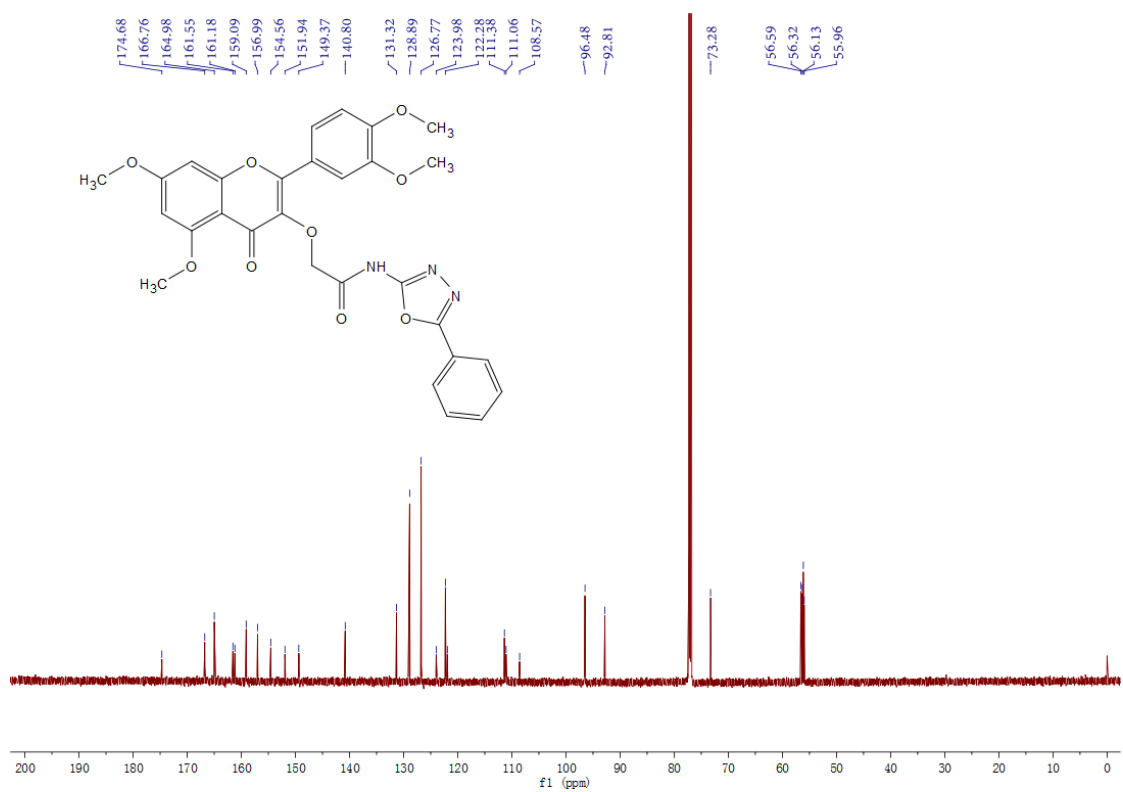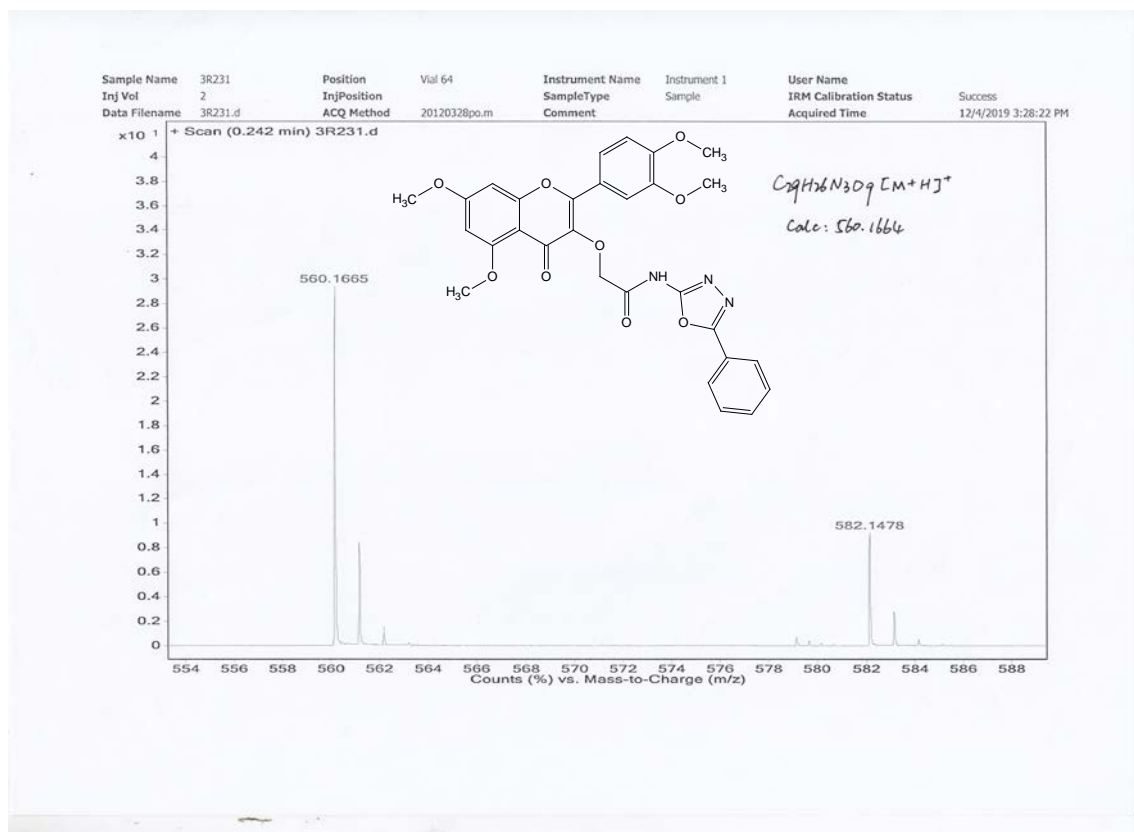

The spectrum of  $^1\text{H}$  NMR,  $^{13}\text{C}$  NMR and HRMS of compound B1

B2

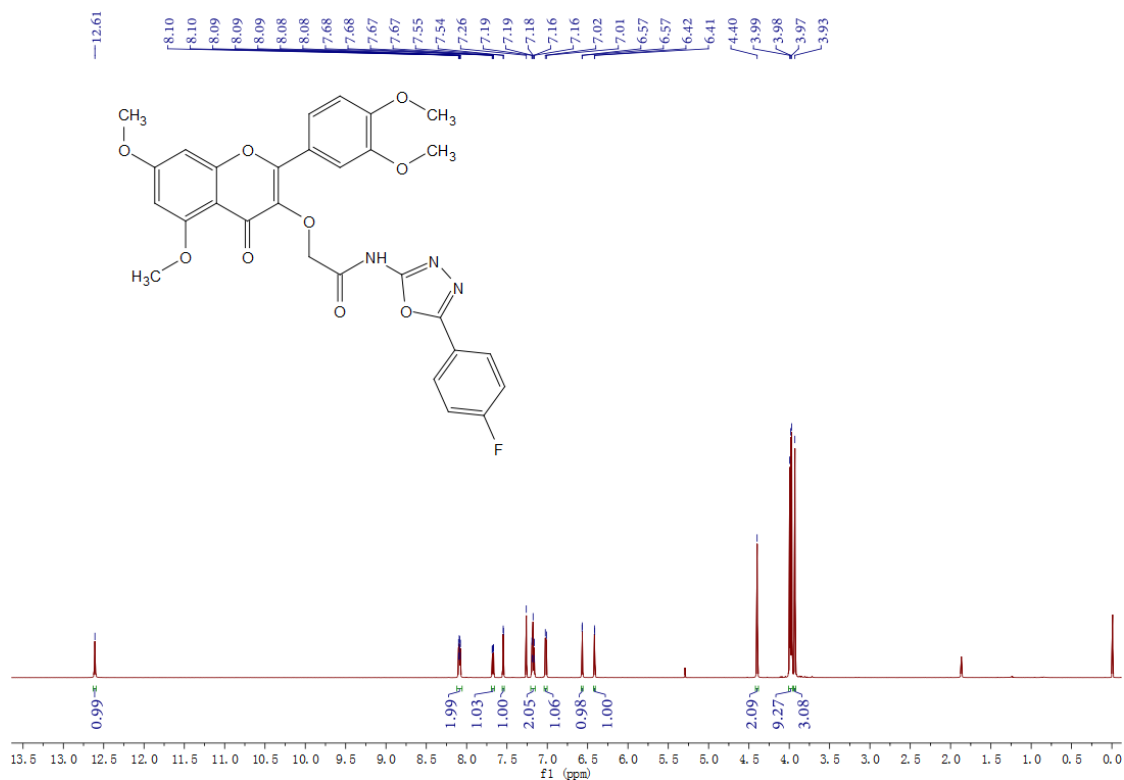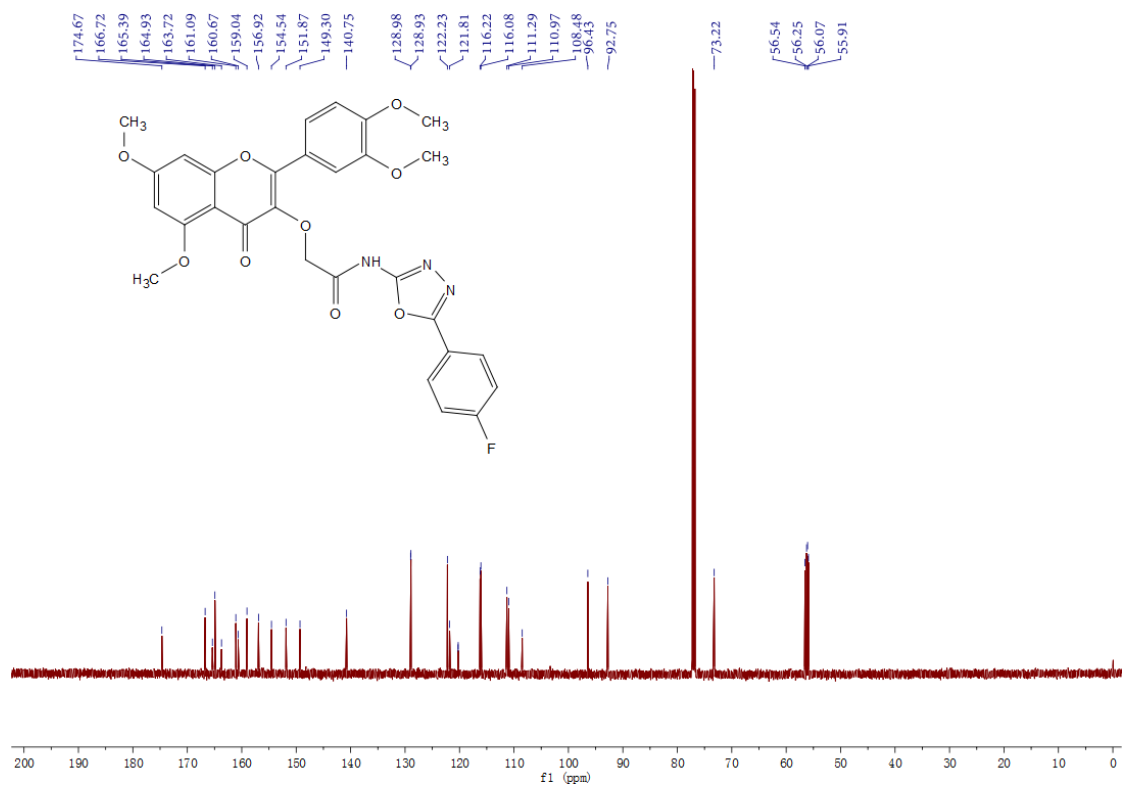

S51



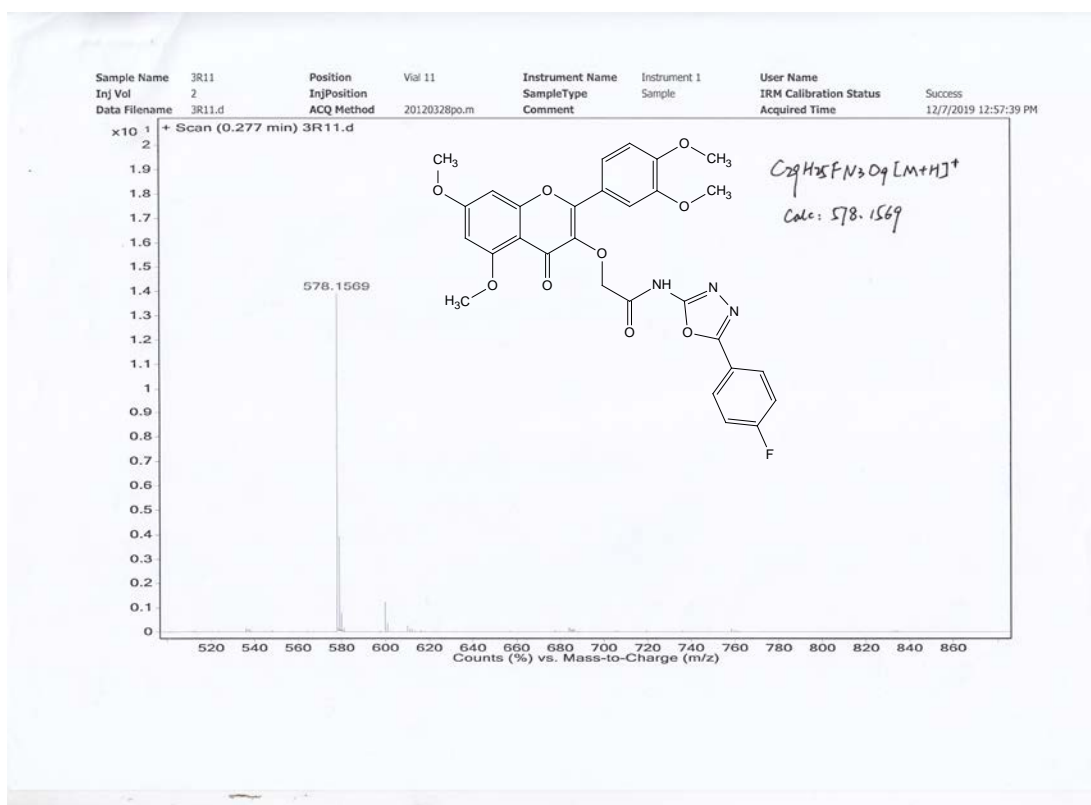

The spectrum of  $^1H$  NMR,  $^{13}C$  NMR and HRMS of compound B2

B3

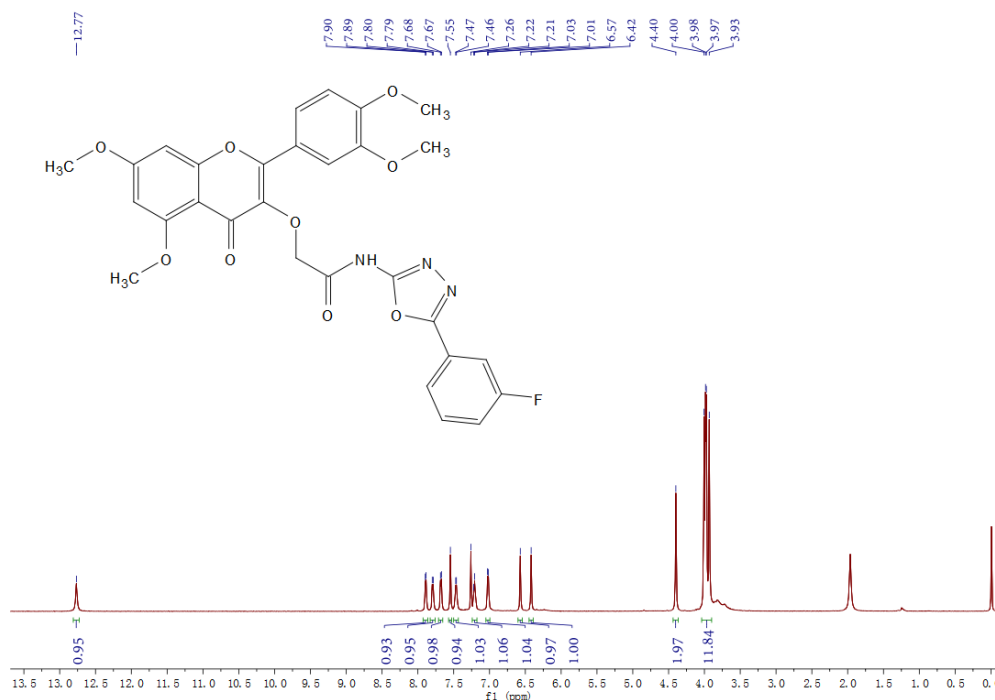

$^1H$  NMR spectrum of compound B3

B4

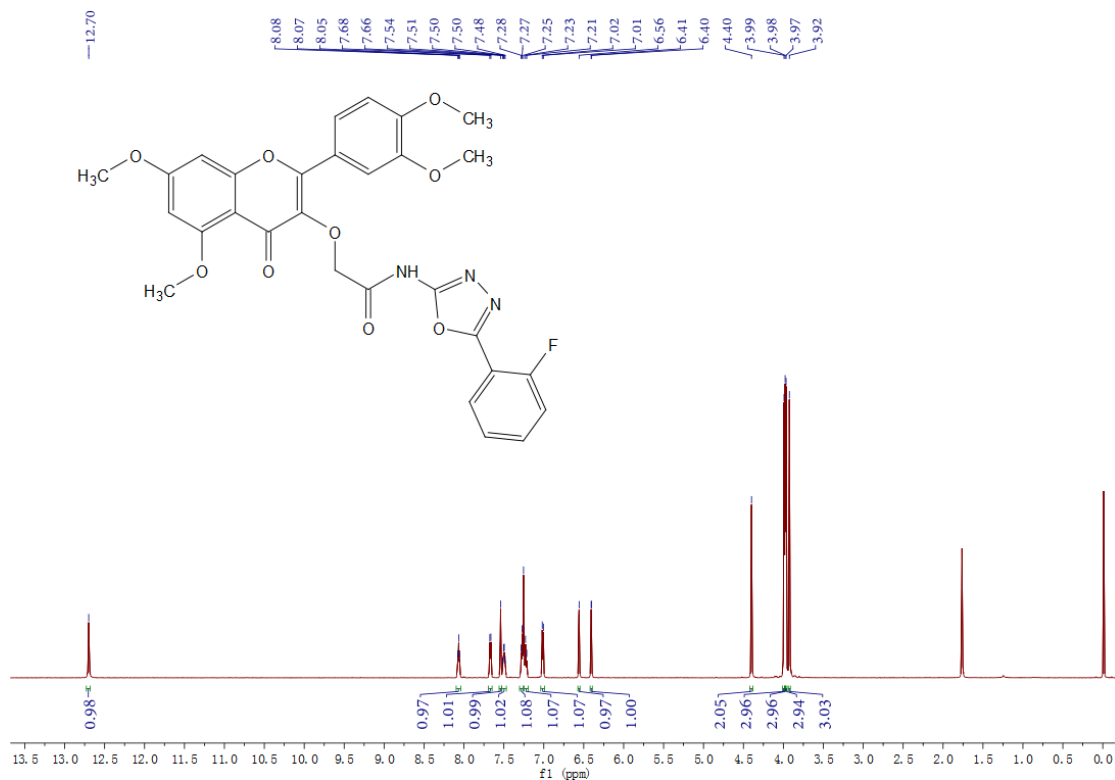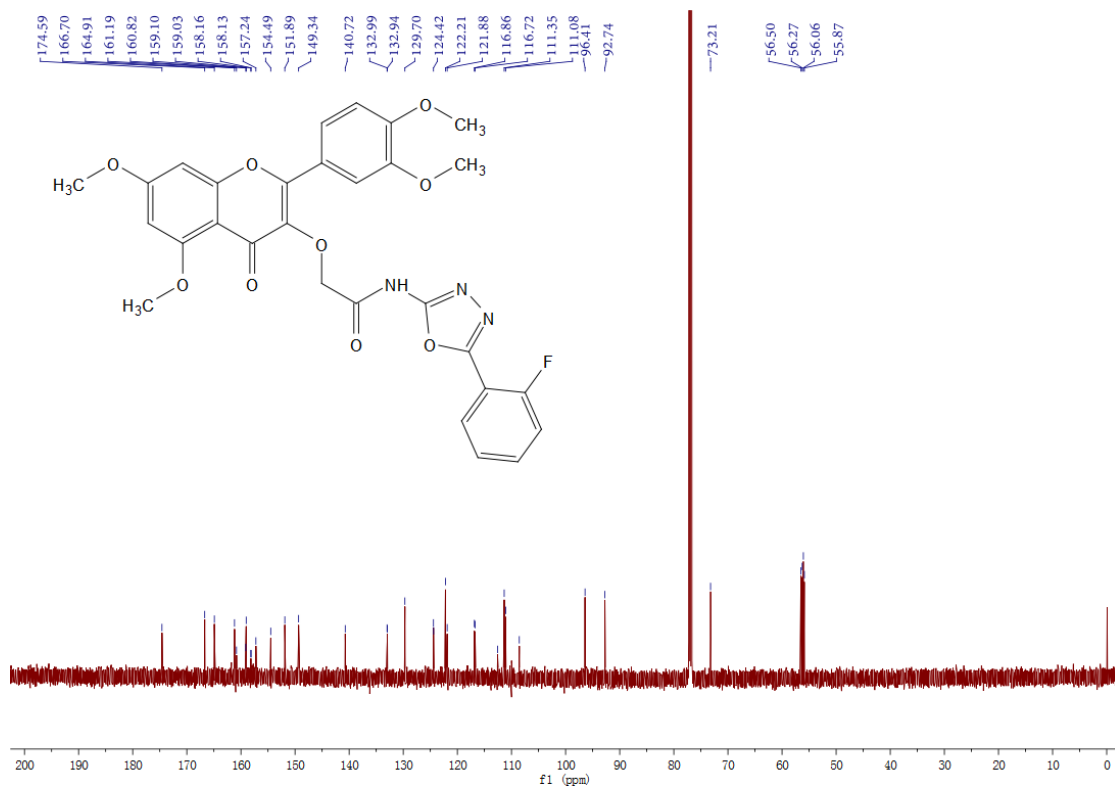

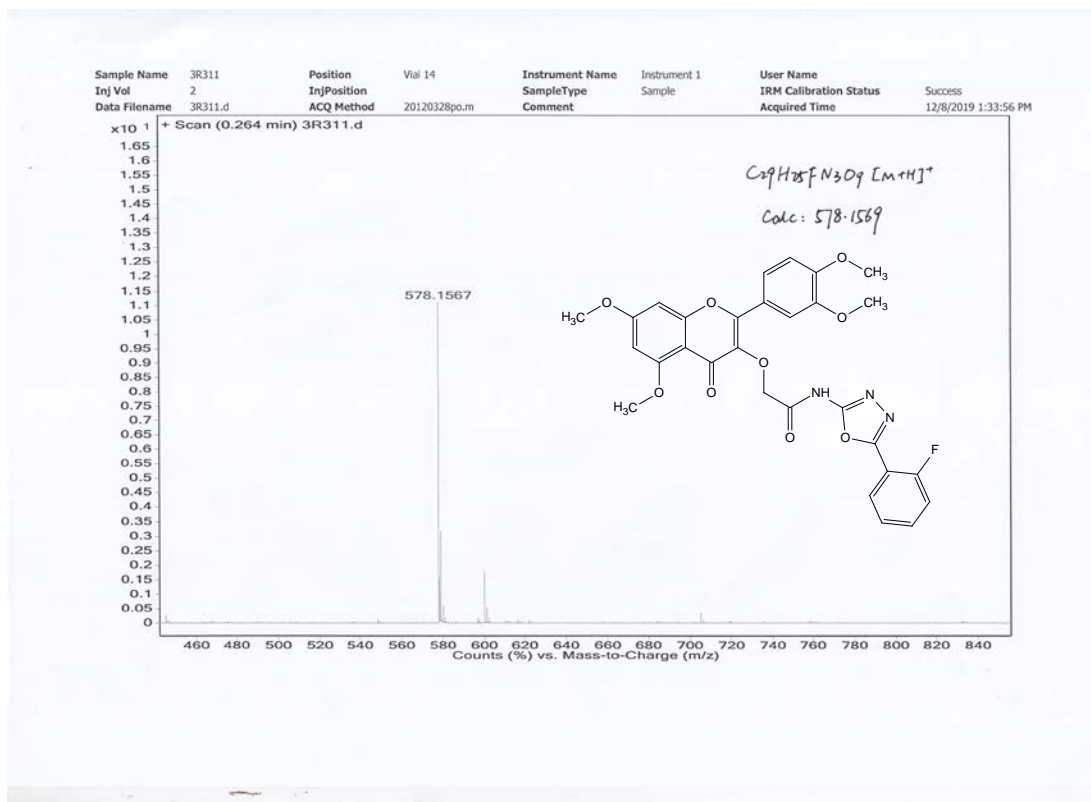

The spectrum of  $^1H$  NMR,  $^{13}C$  NMR and HRMS of compound B4

B5

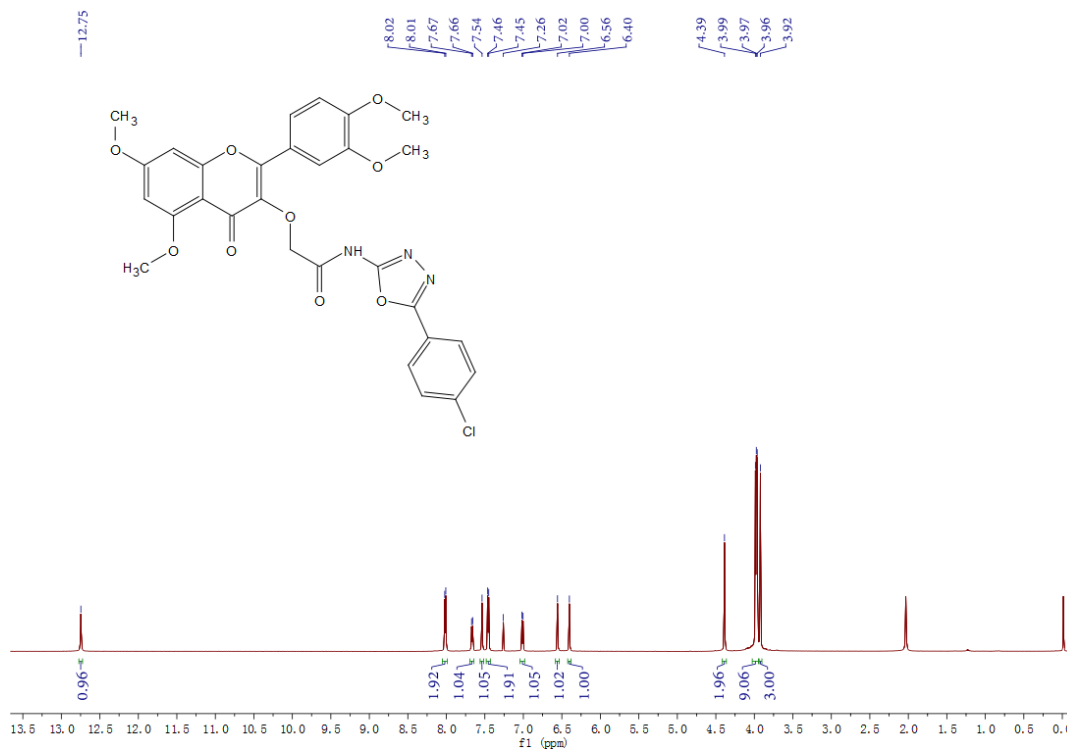

S54

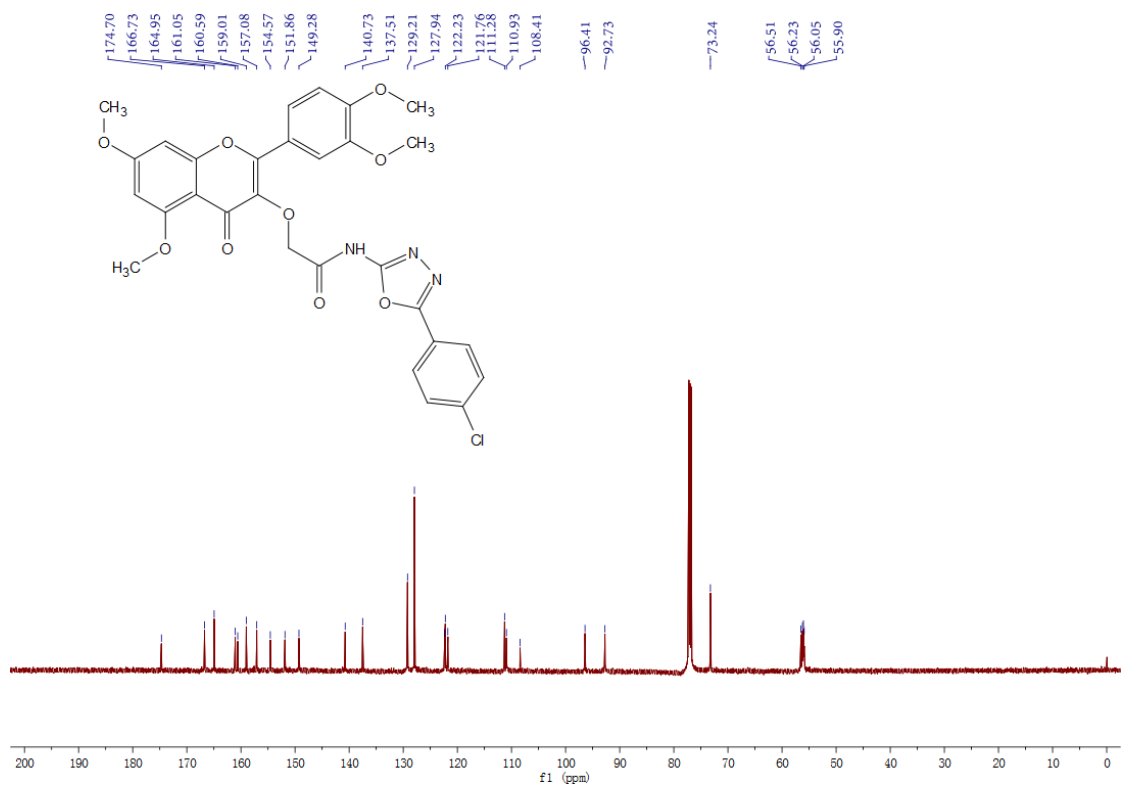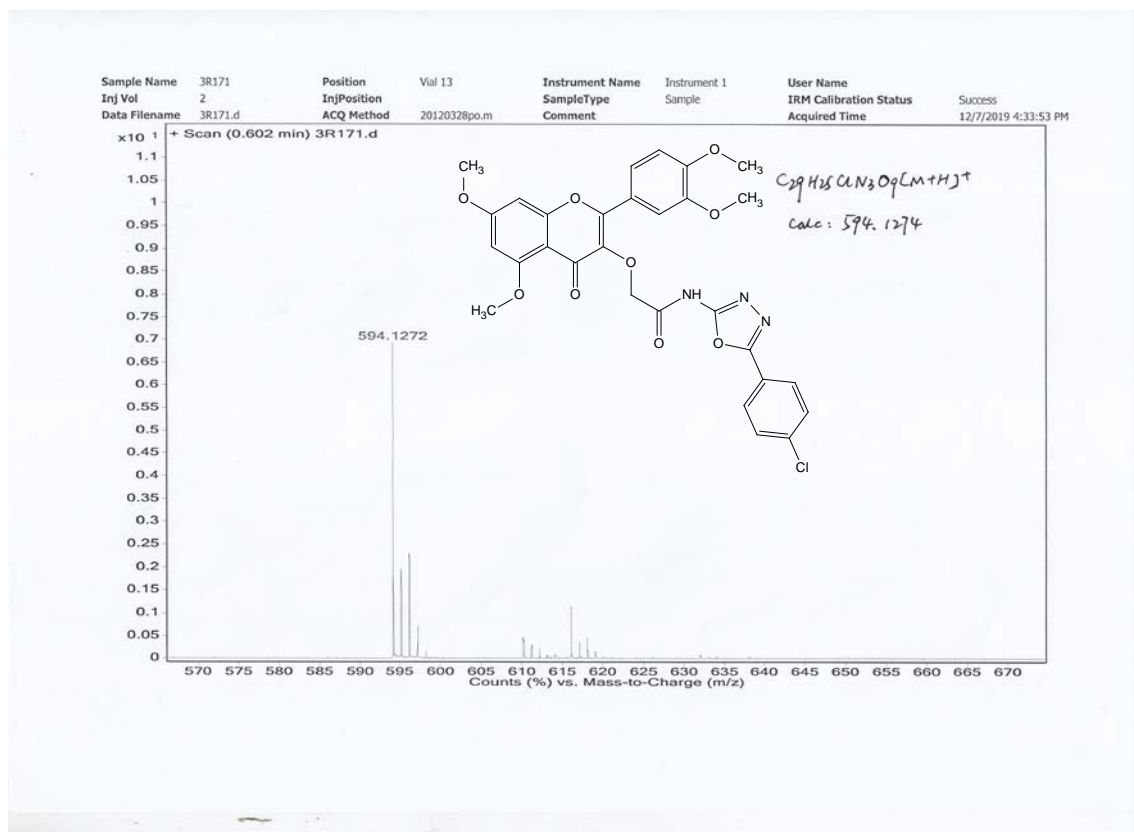

The spectrum of  $^1H$  NMR,  $^{13}C$  NMR and HRMS of compound B5

B6

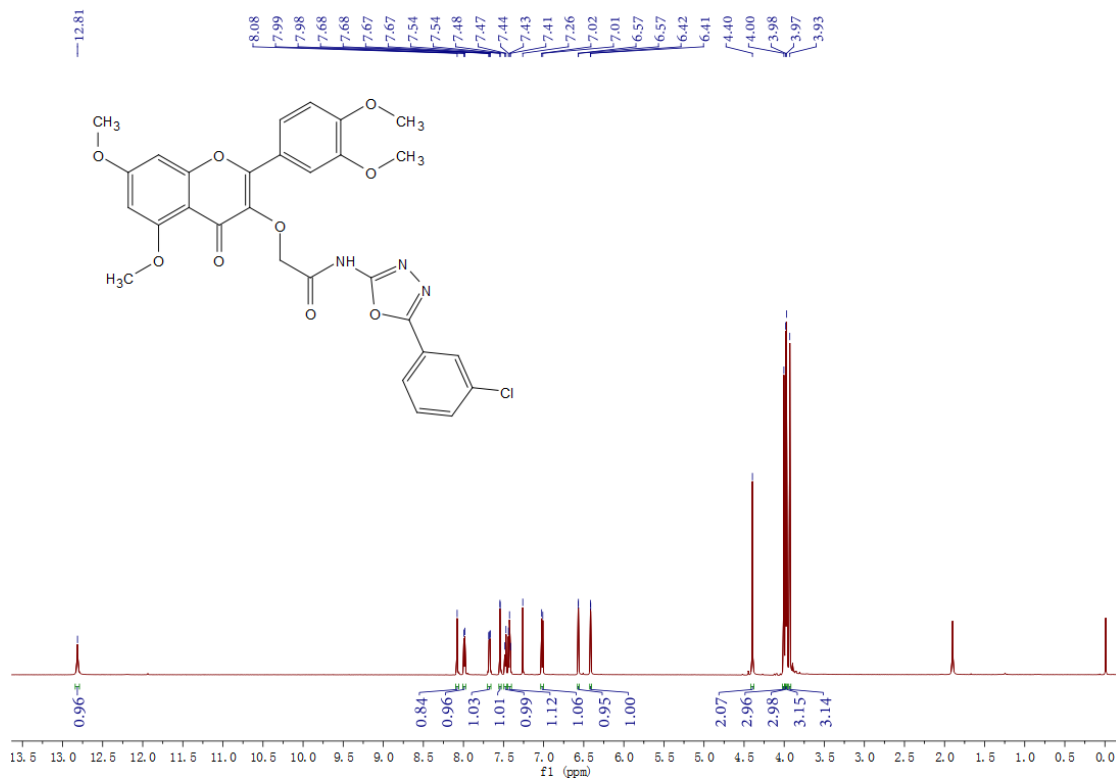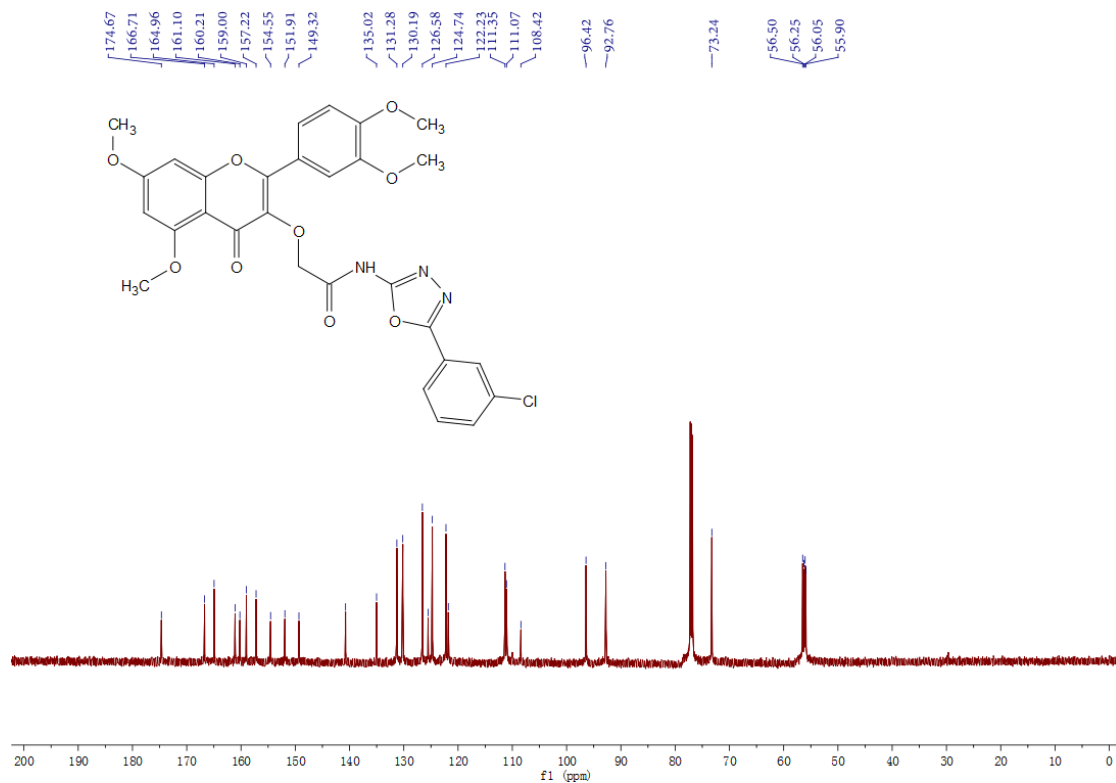

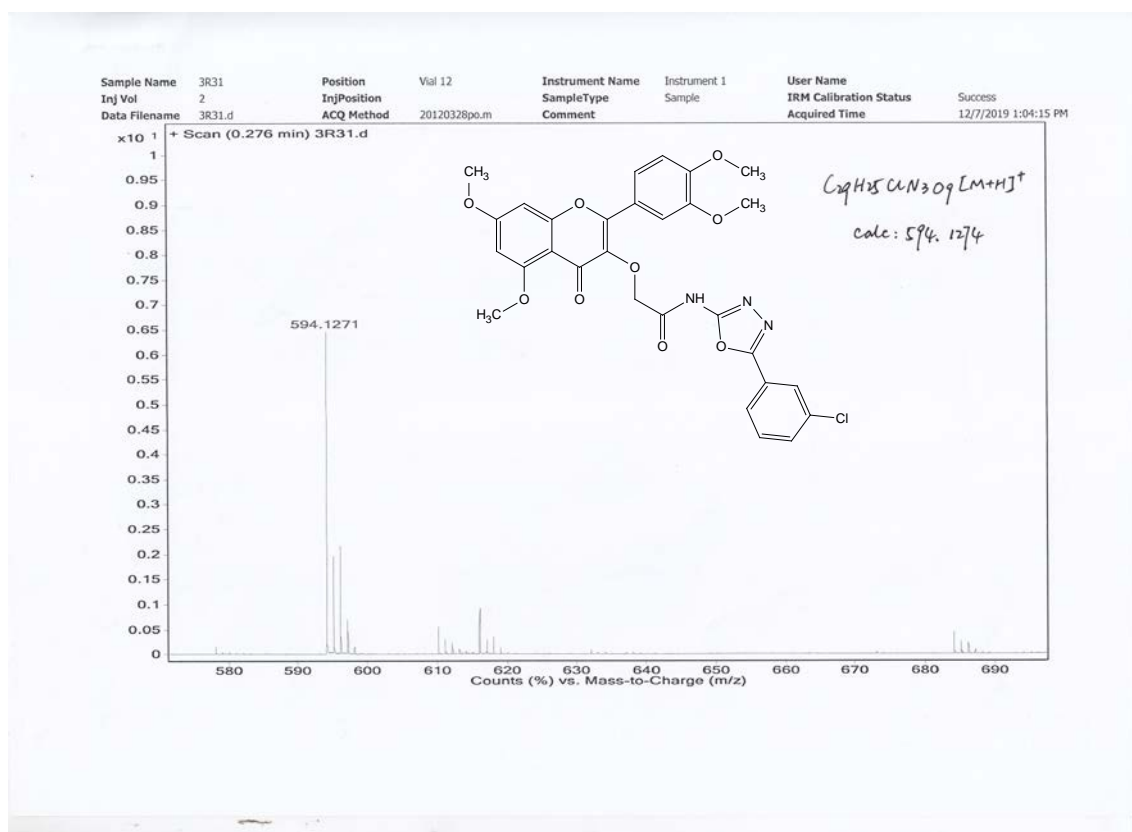

The spectrum of  $^1H$  NMR,  $^{13}C$  NMR and HRMS of compound B6

**B7**

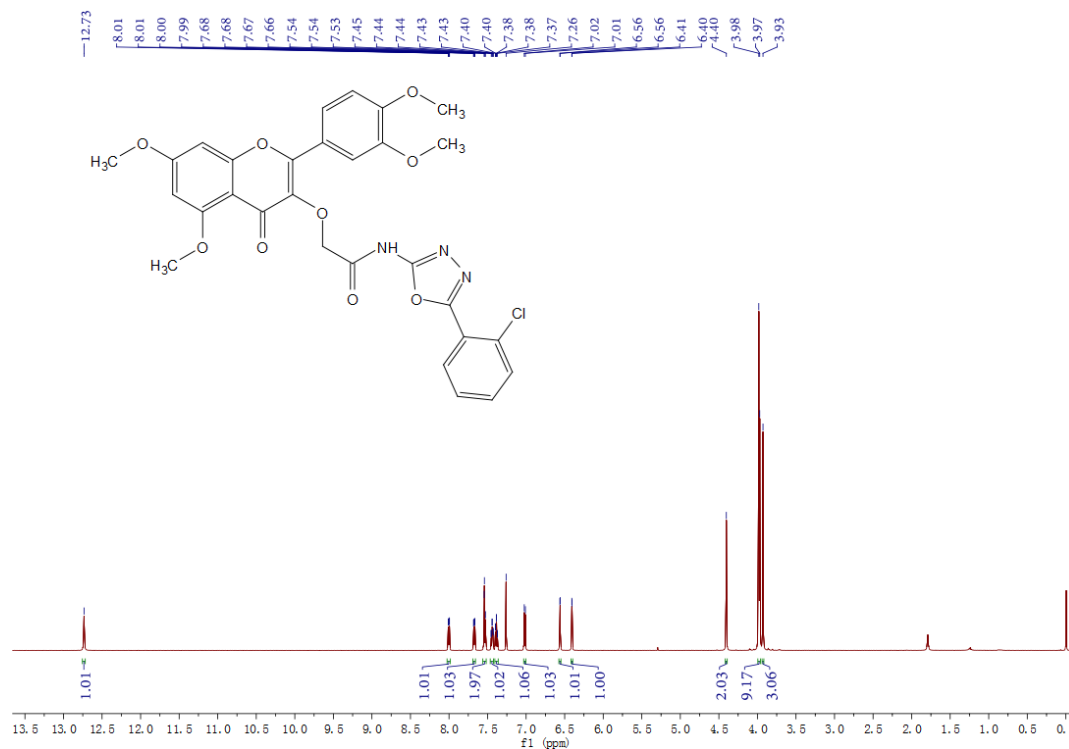

**S57**

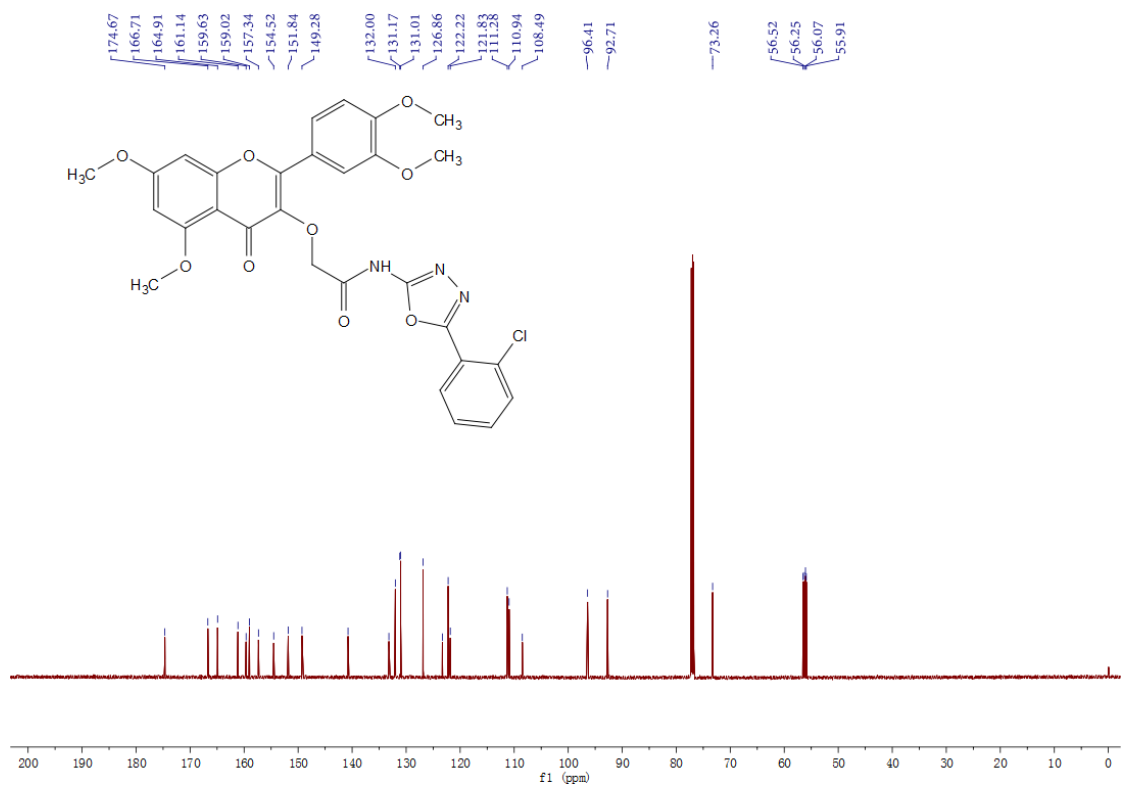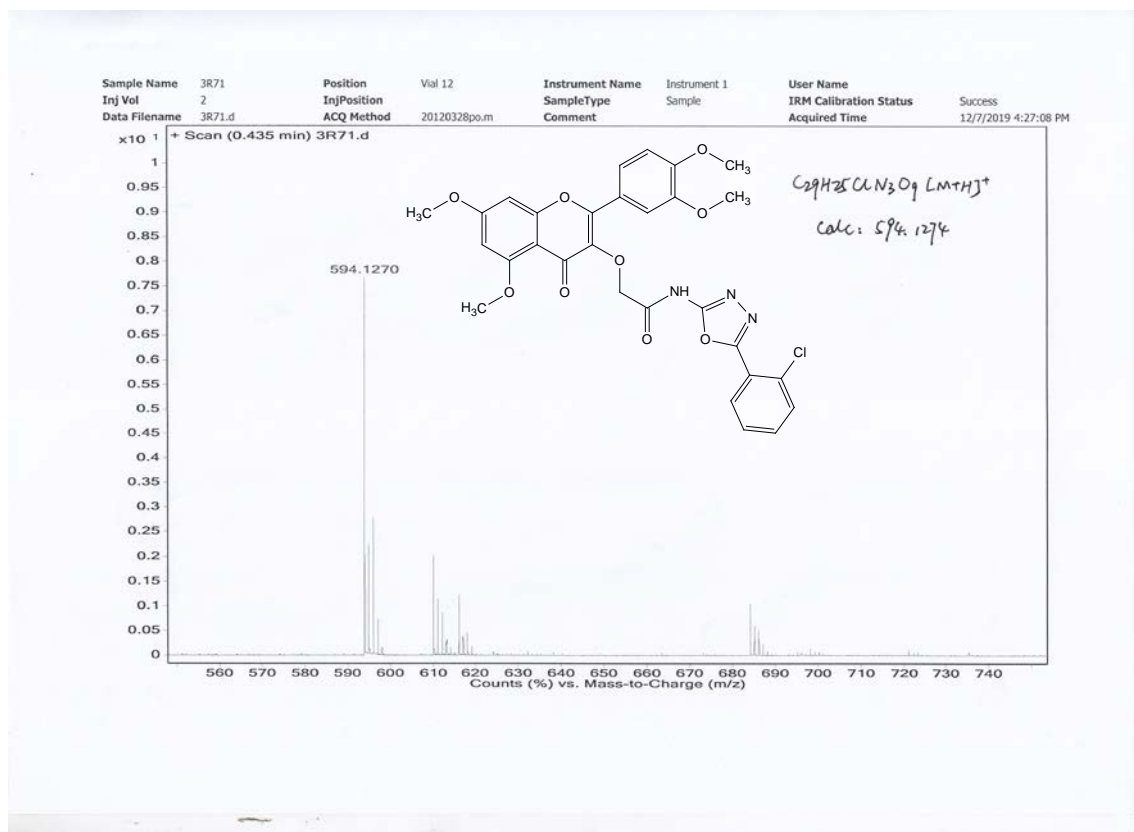

The spectrum of <sup>1</sup>H NMR, <sup>13</sup>C NMR and HRMS of compound B7

B8

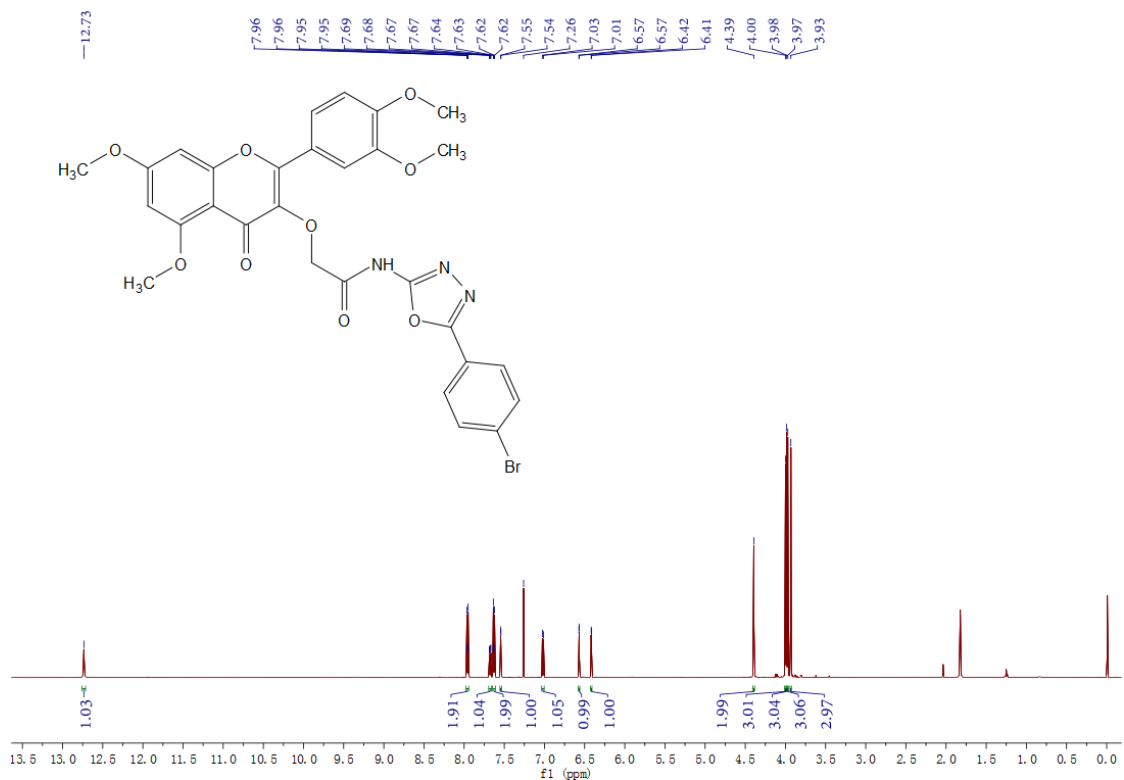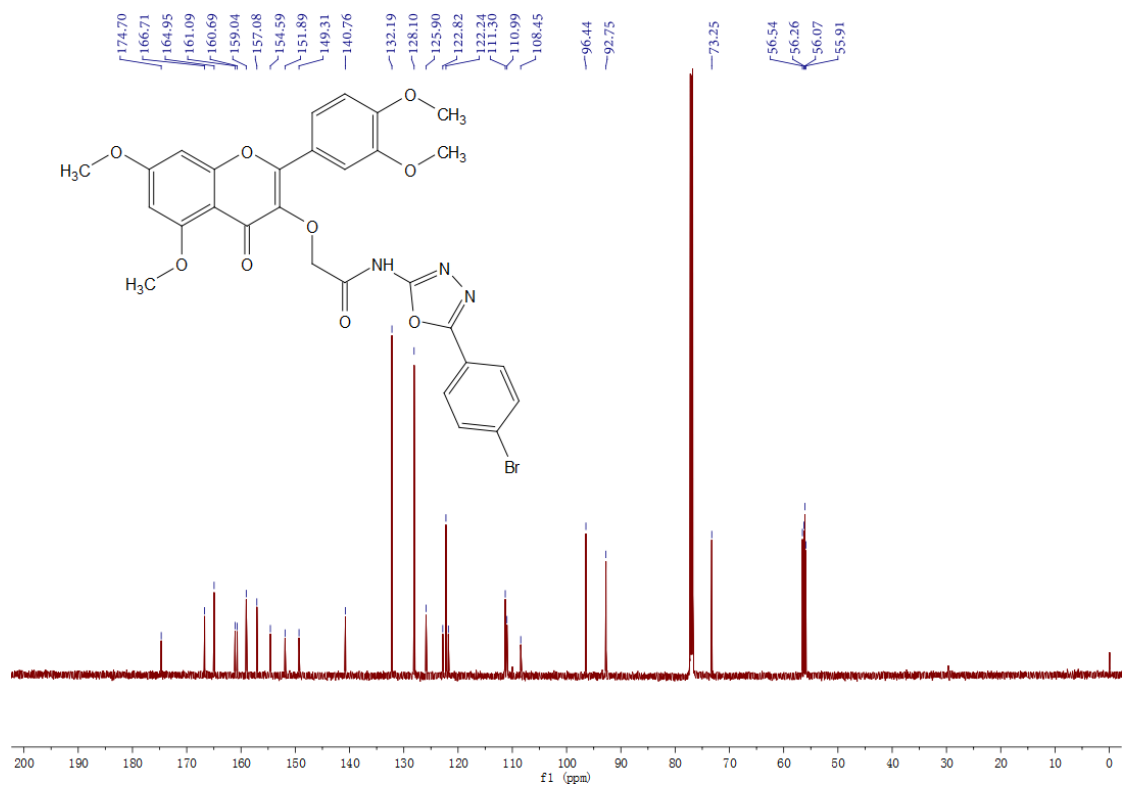



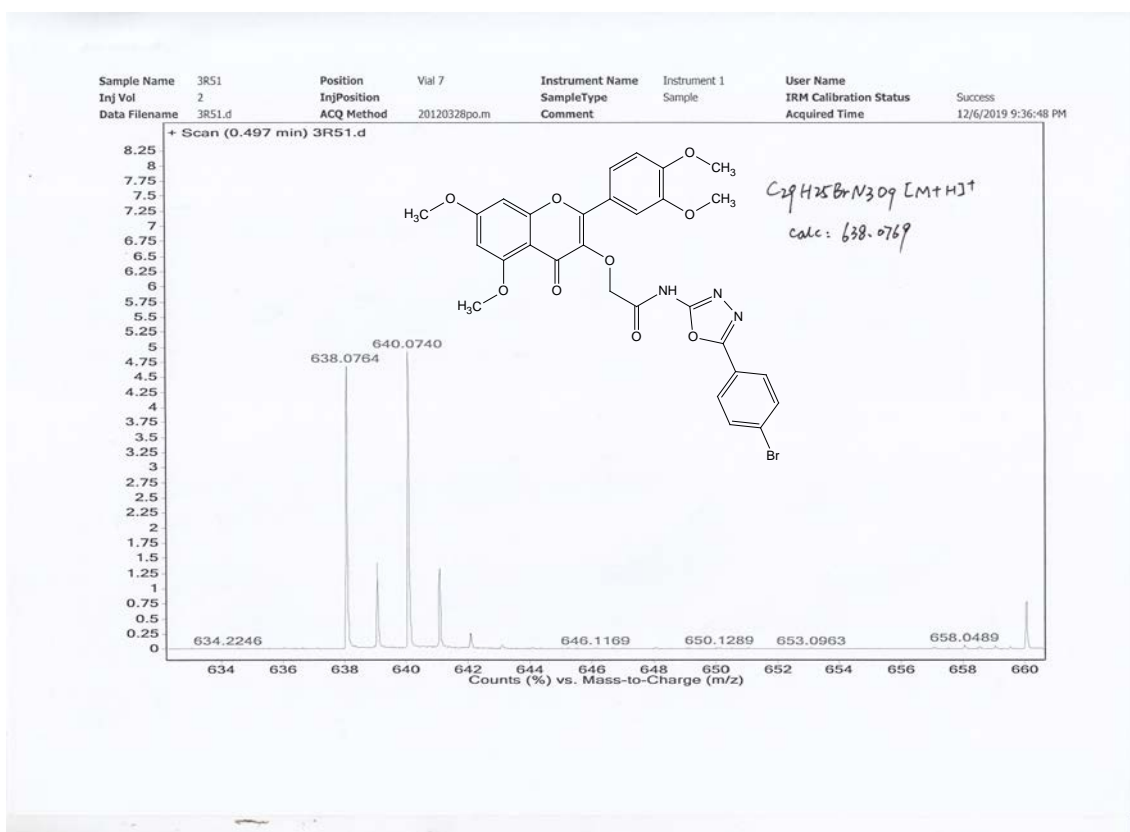

The spectrum of  $^1H$  NMR,  $^{13}C$  NMR and HRMS of compound B8

**B9**

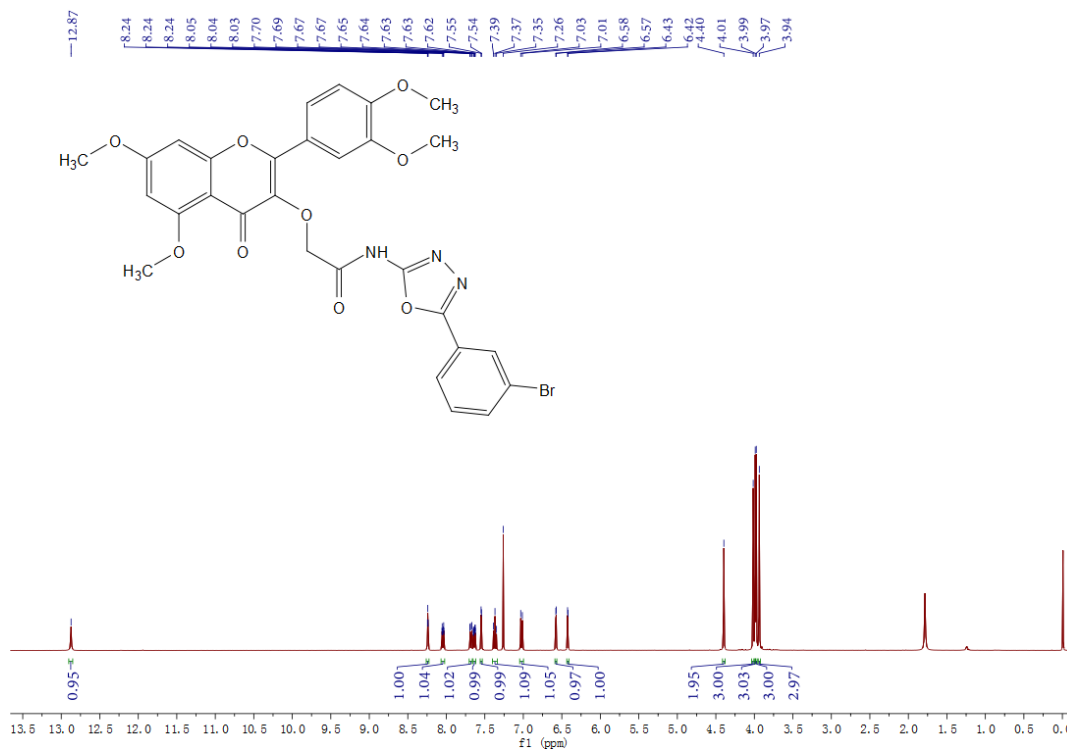

**S60**

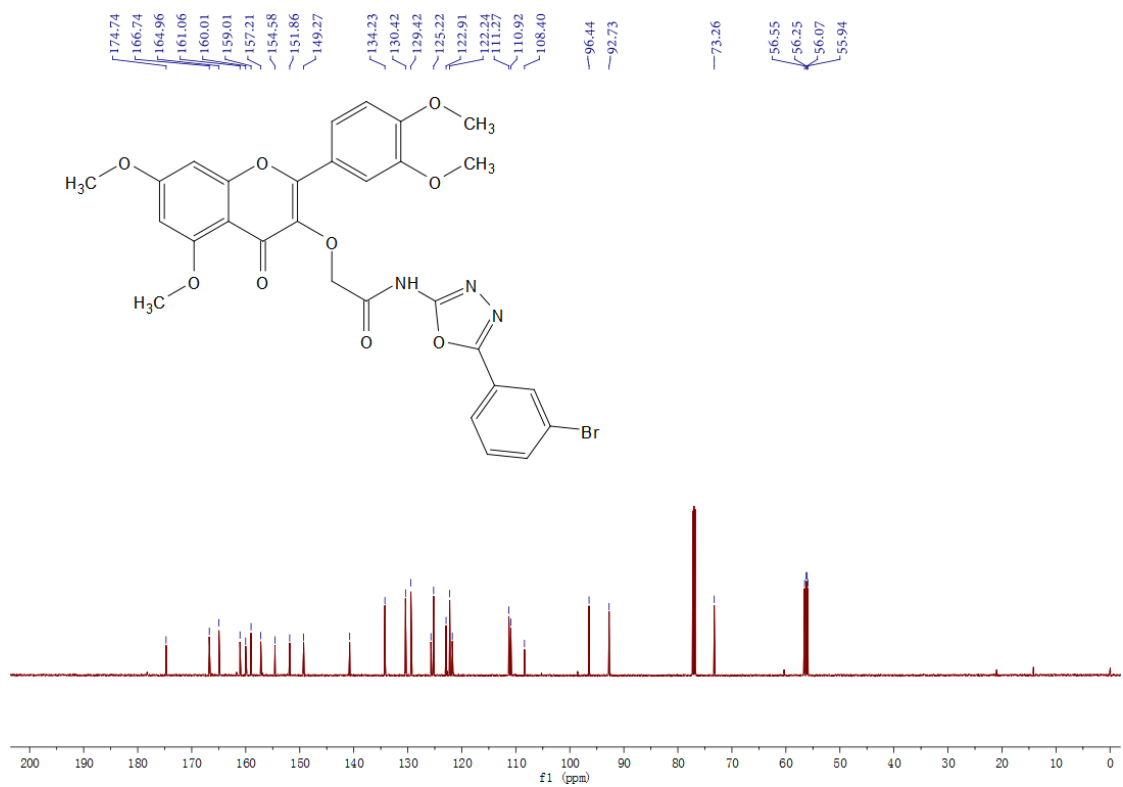

**<sup>1</sup>H NMR and <sup>13</sup>C NMR spectrum of compound B9**

**B10**

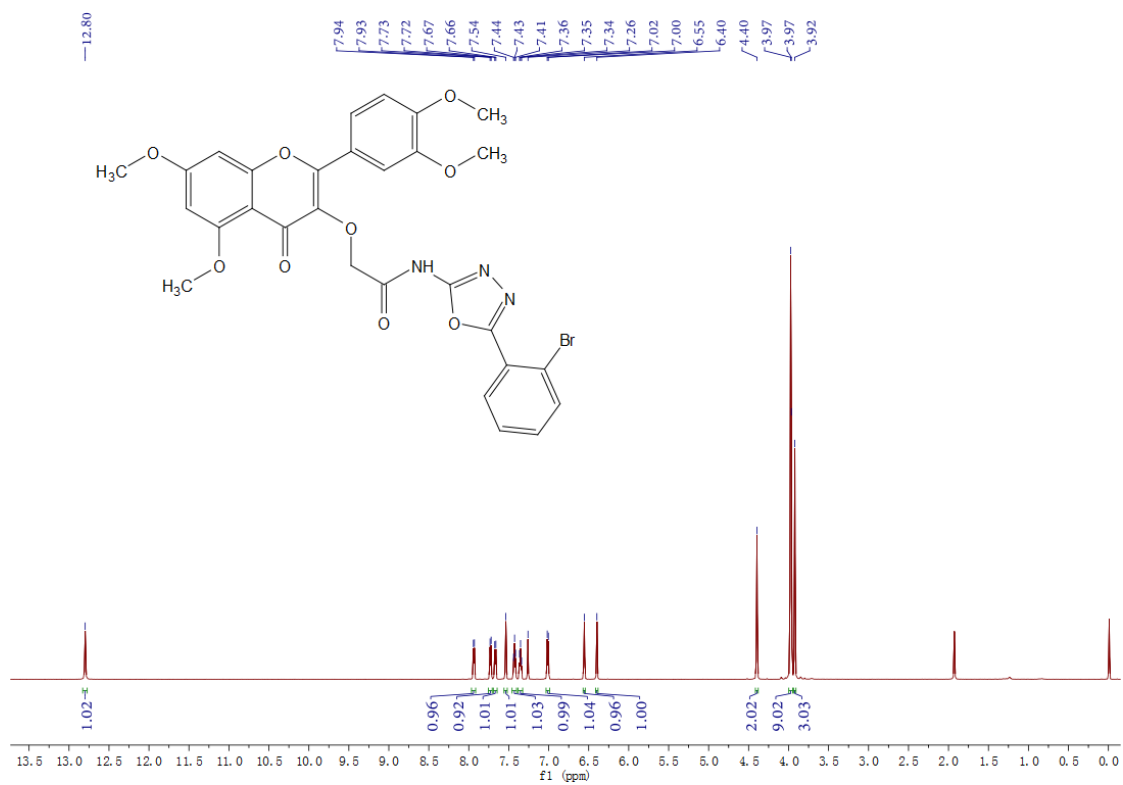

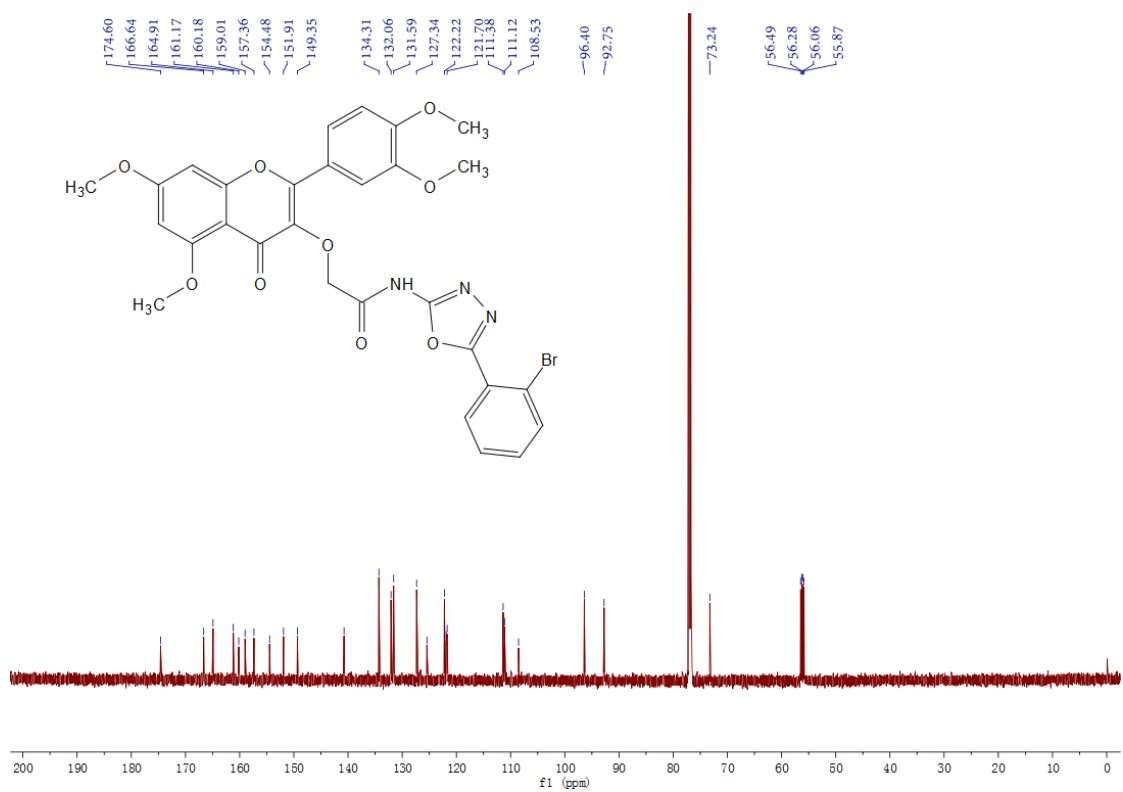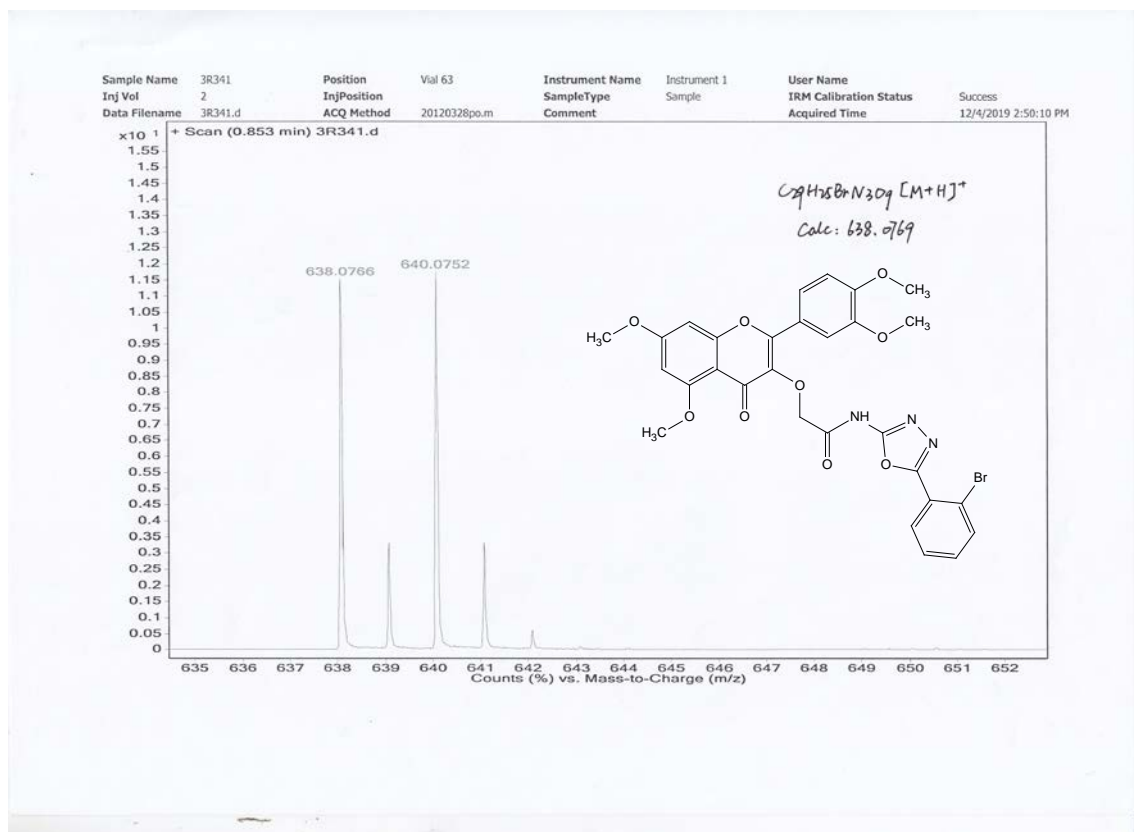

The spectrum of  $^1\text{H}$  NMR,  $^{13}\text{C}$  NMR and HRMS of compound B10

B11

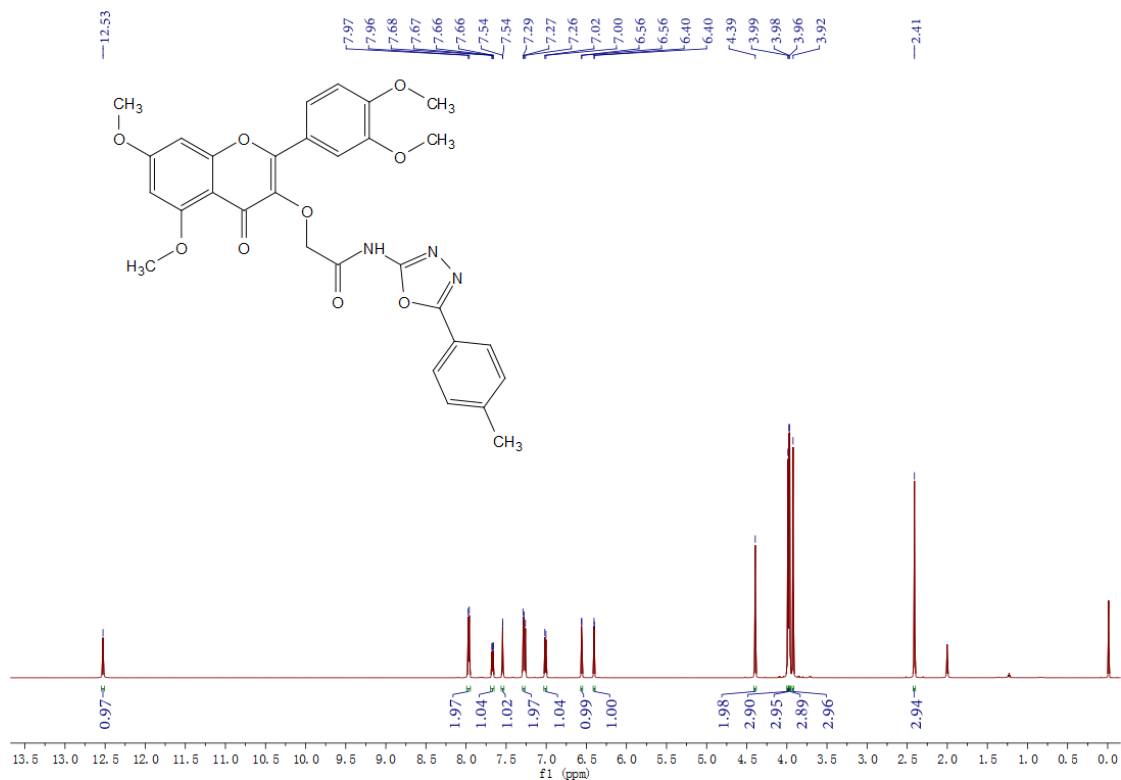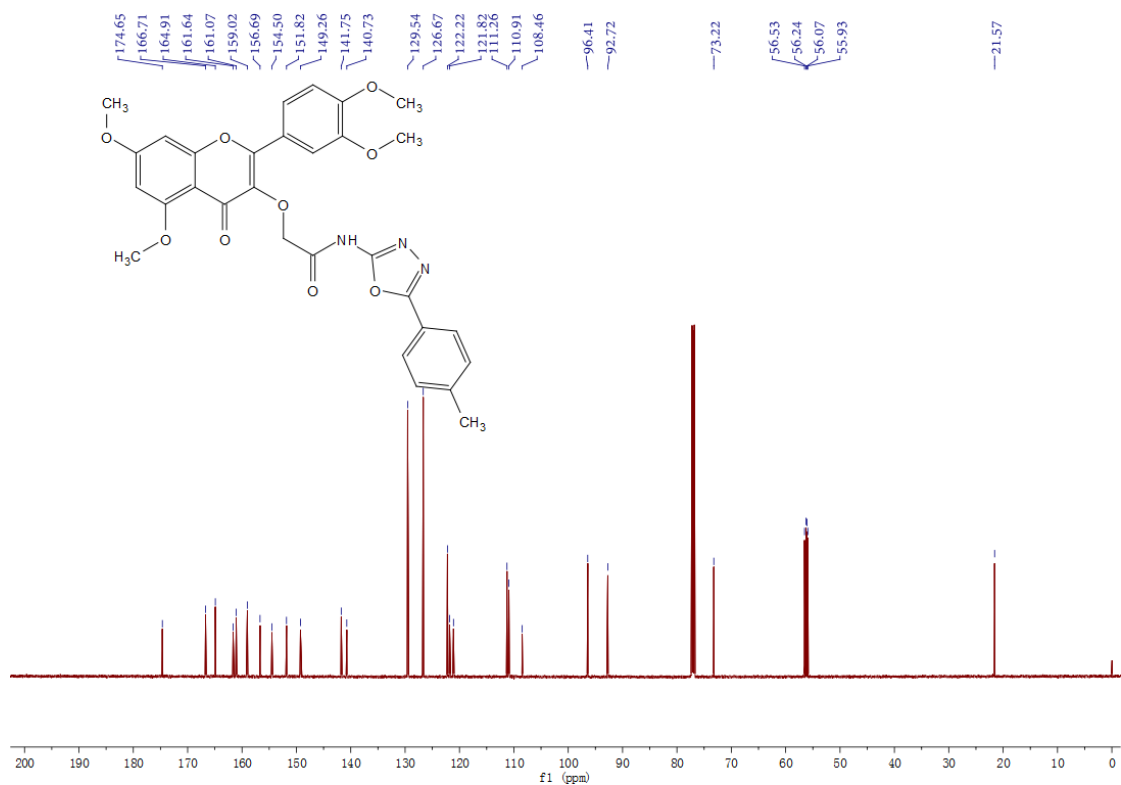

S63

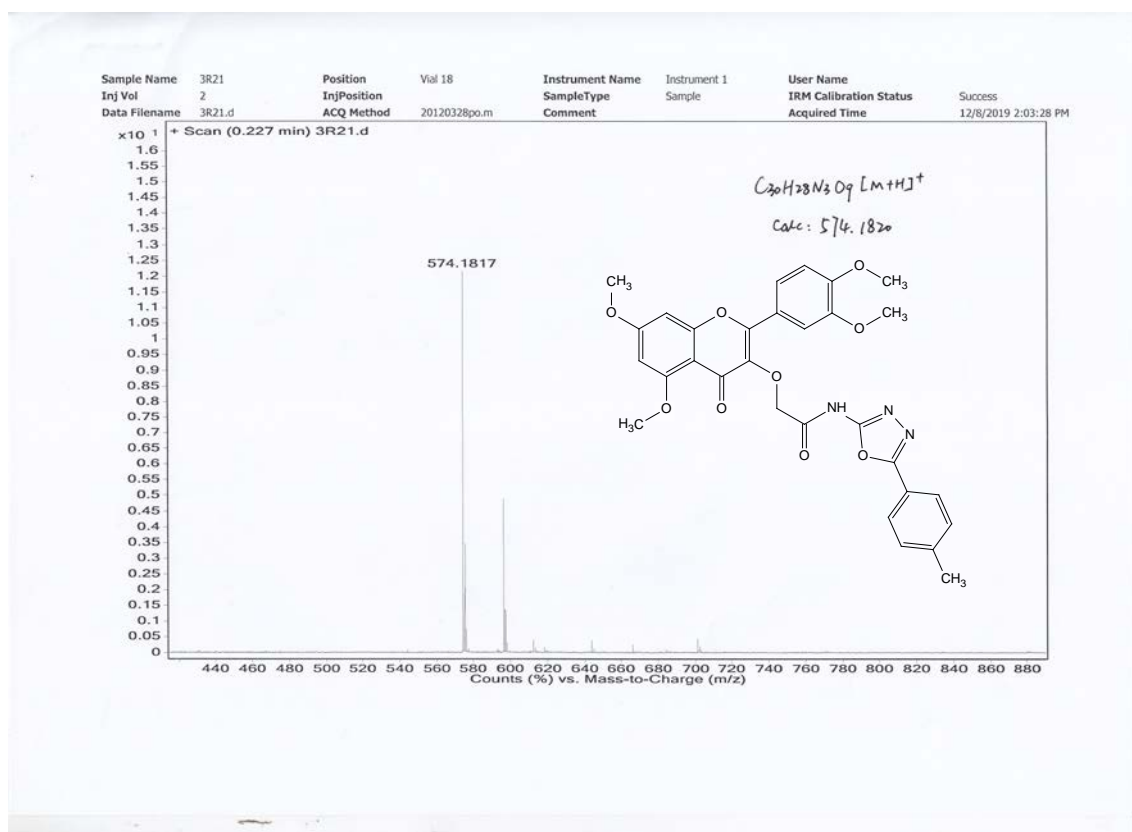

The spectrum of  $^1\text{H}$  NMR,  $^{13}\text{C}$  NMR and HRMS of compound B11

## B12

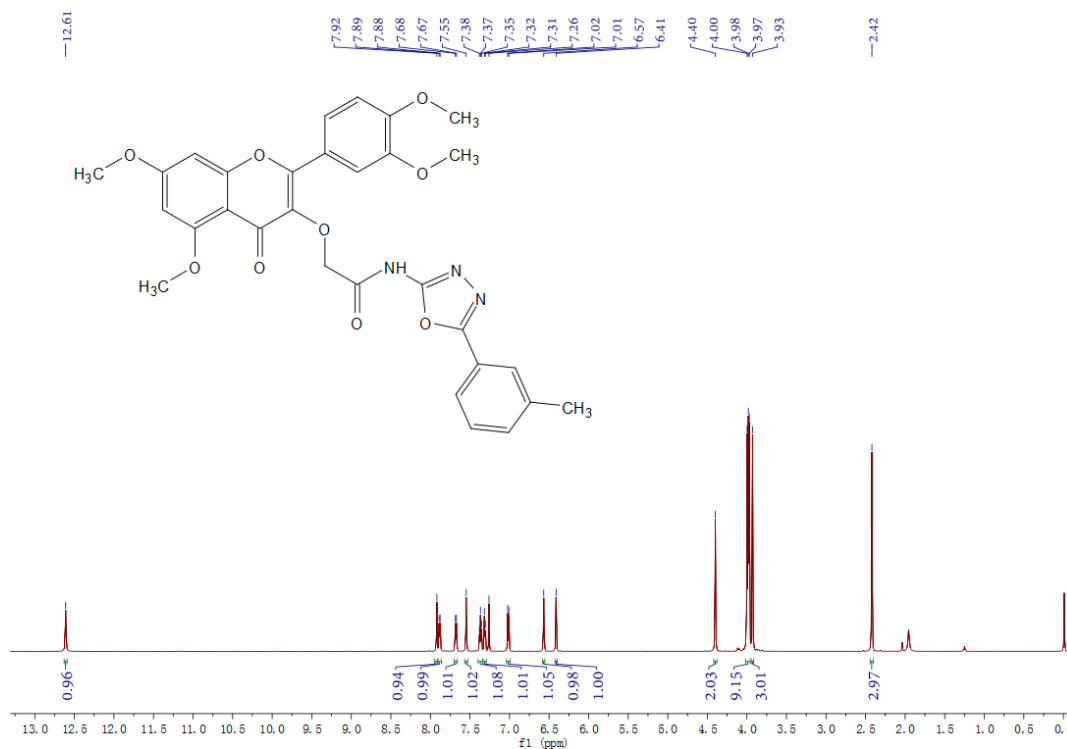

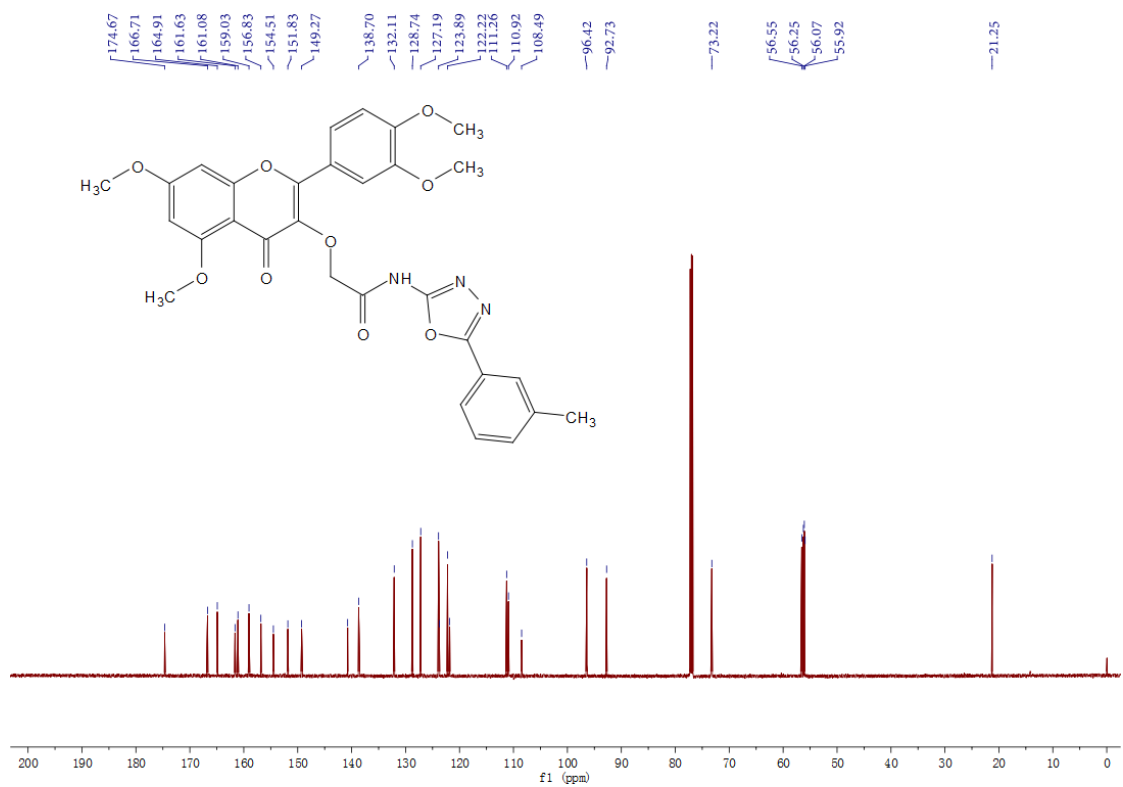

<sup>1</sup>H NMR and <sup>13</sup>C NMR spectrum of compound B12

B13

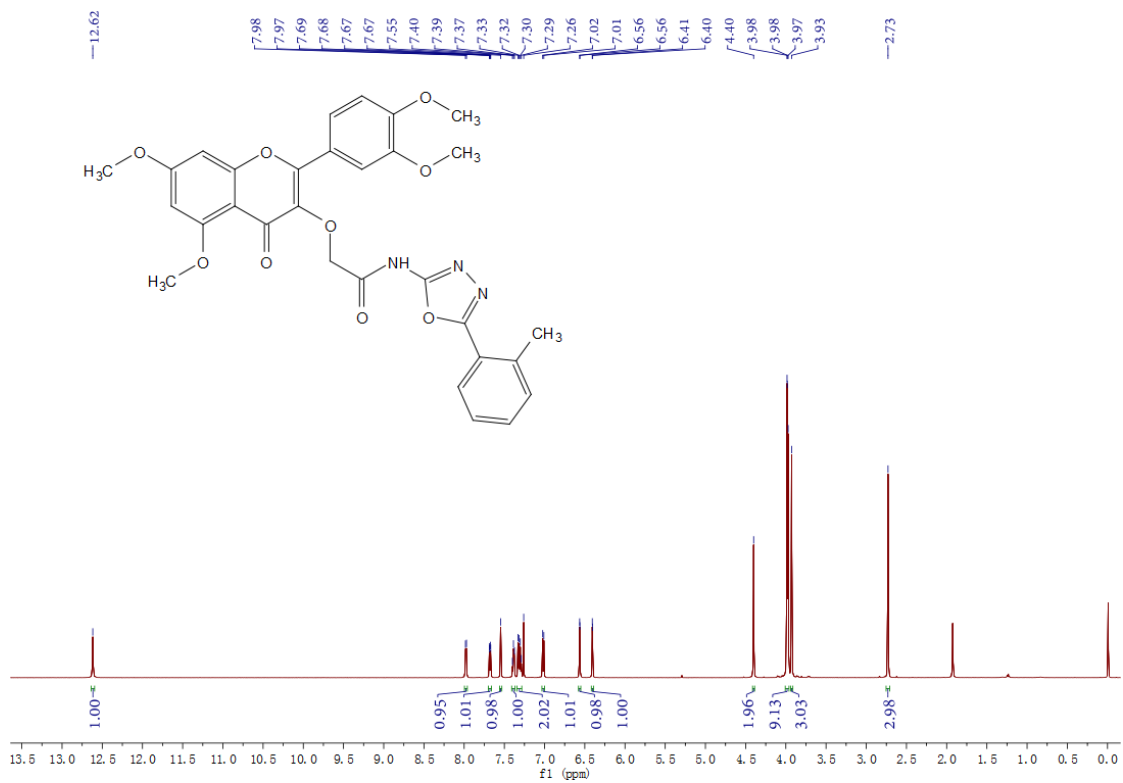

S65

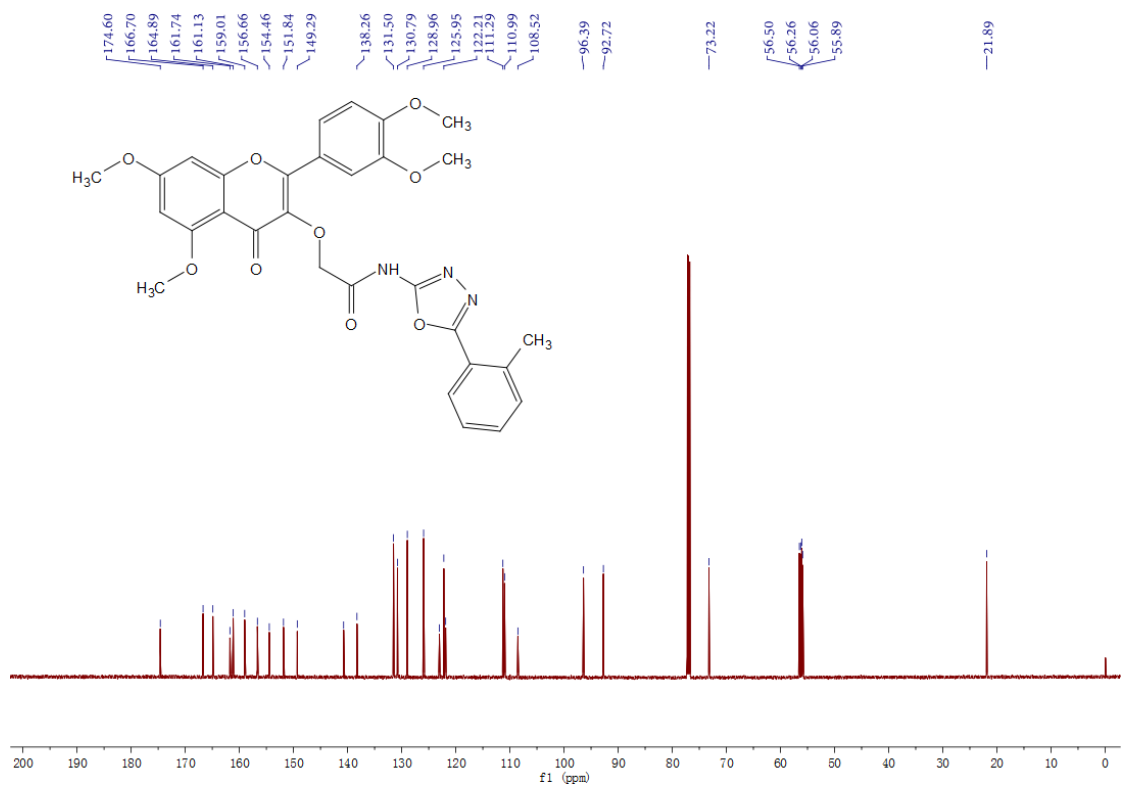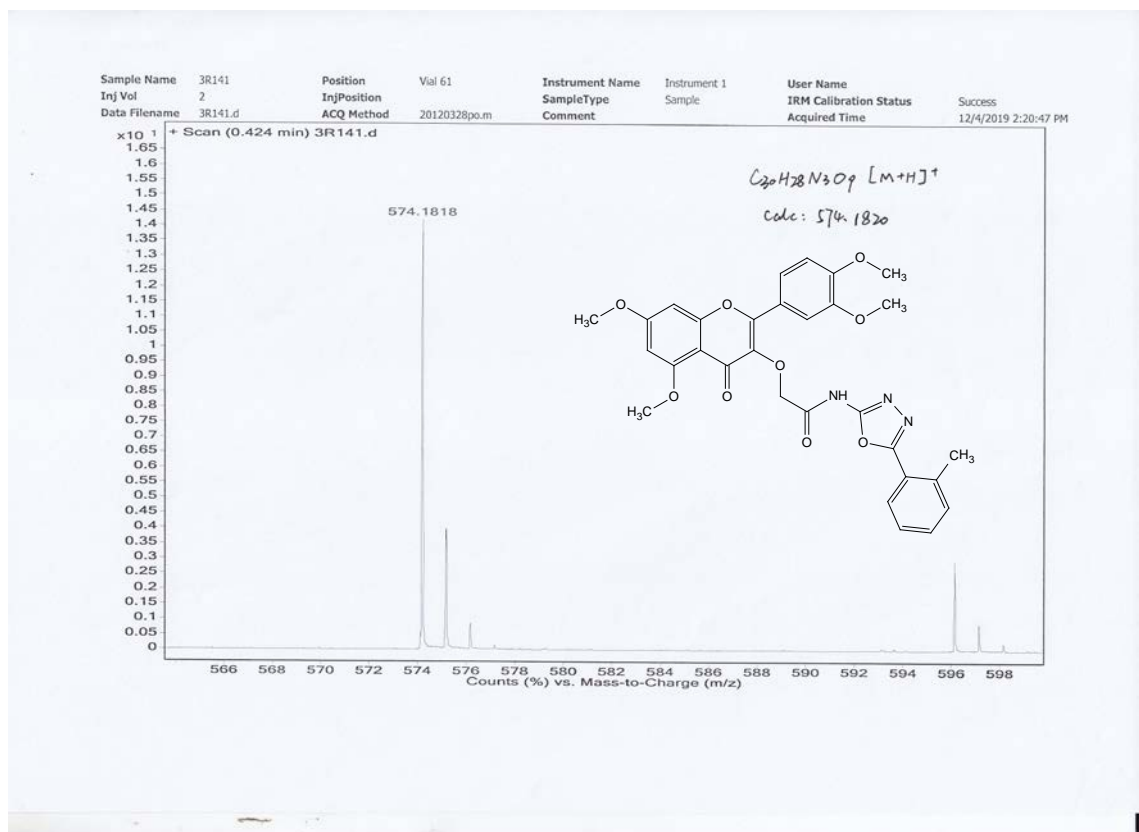

The spectrum of <sup>1</sup>H NMR, <sup>13</sup>C NMR and HRMS of compound B13

# B14

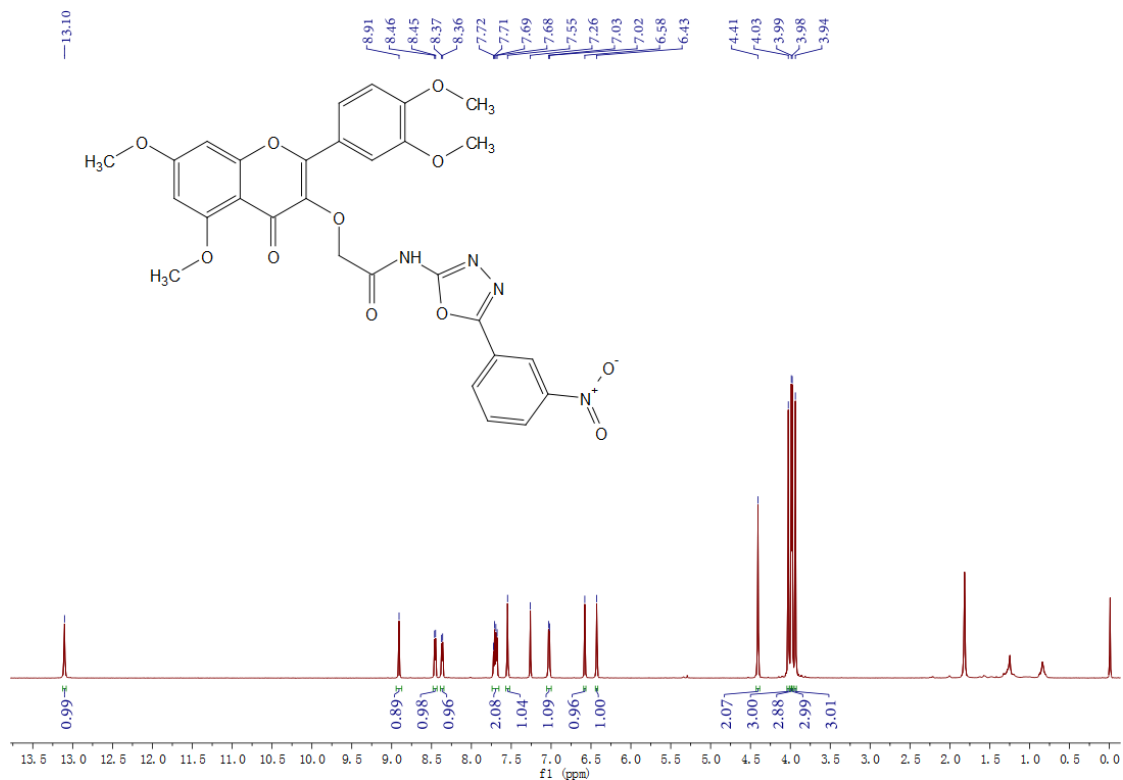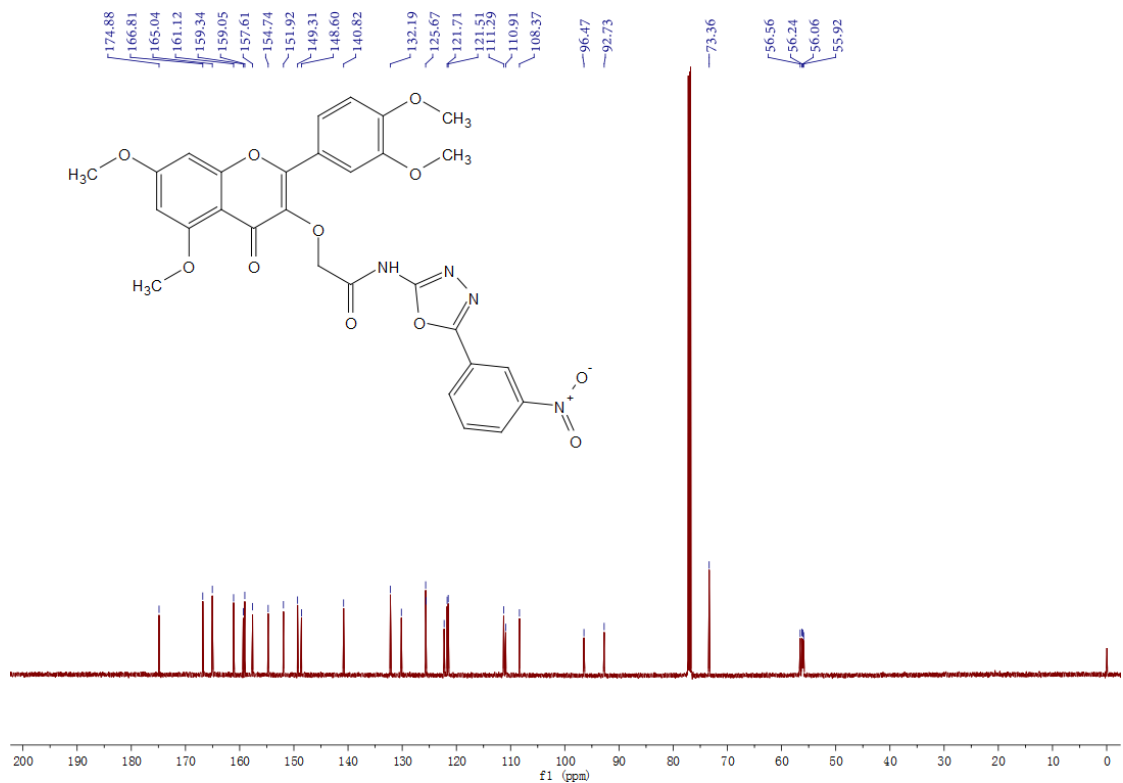



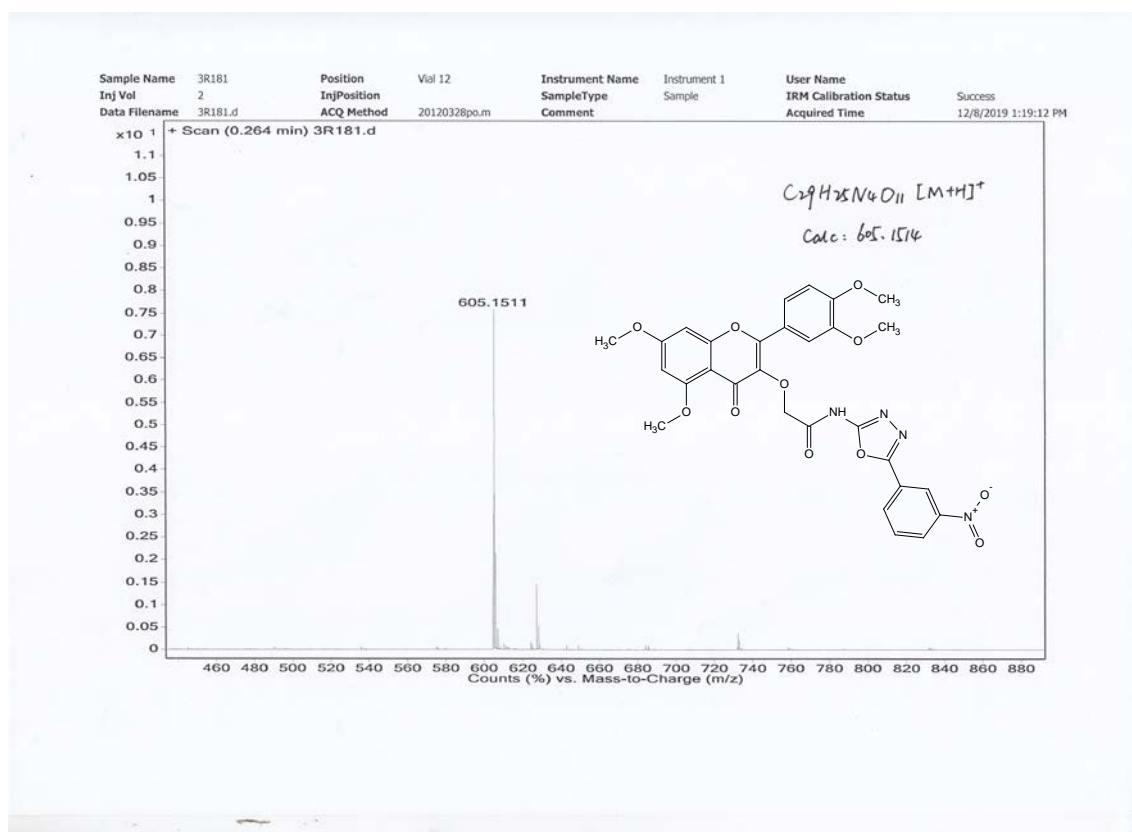

The spectrum of  $^1H$  NMR,  $^{13}C$  NMR and HRMS of compound B14

## B15

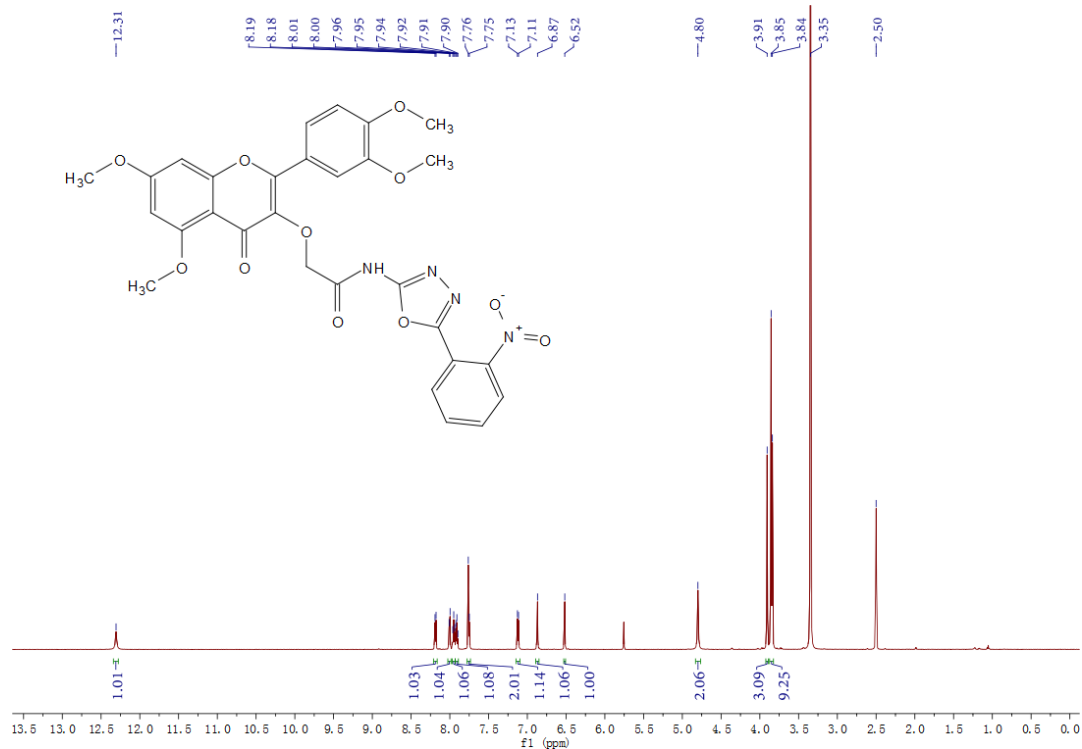

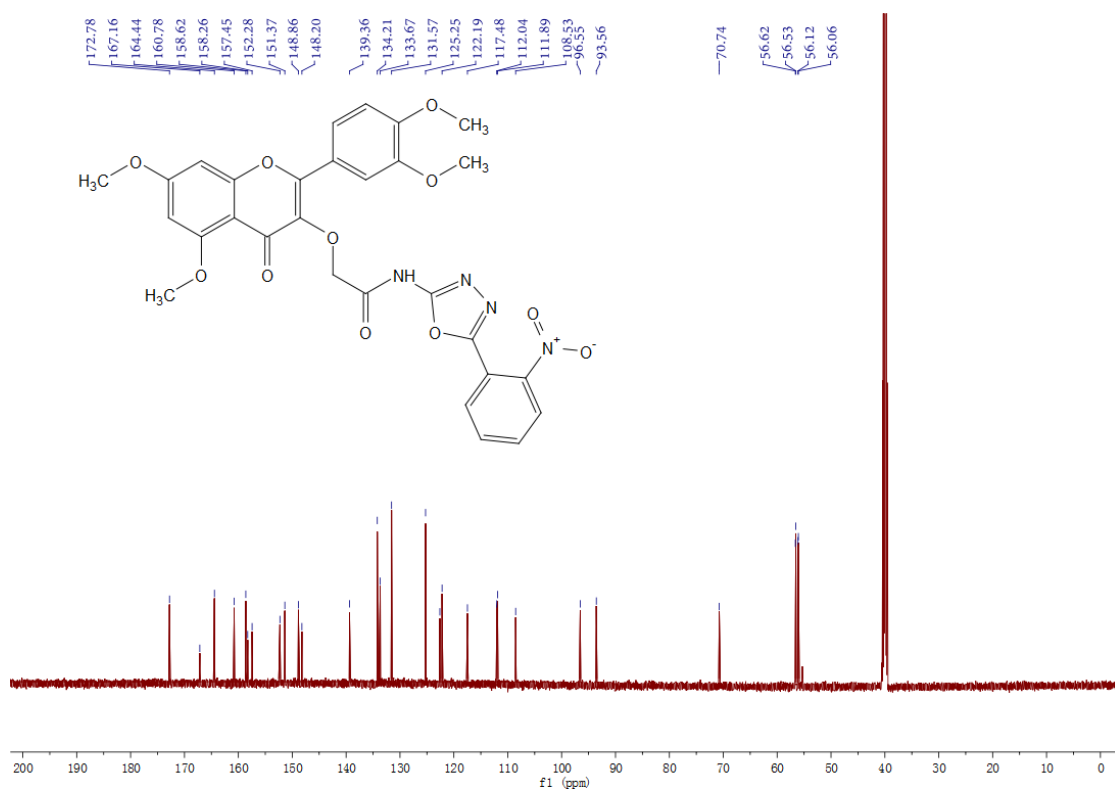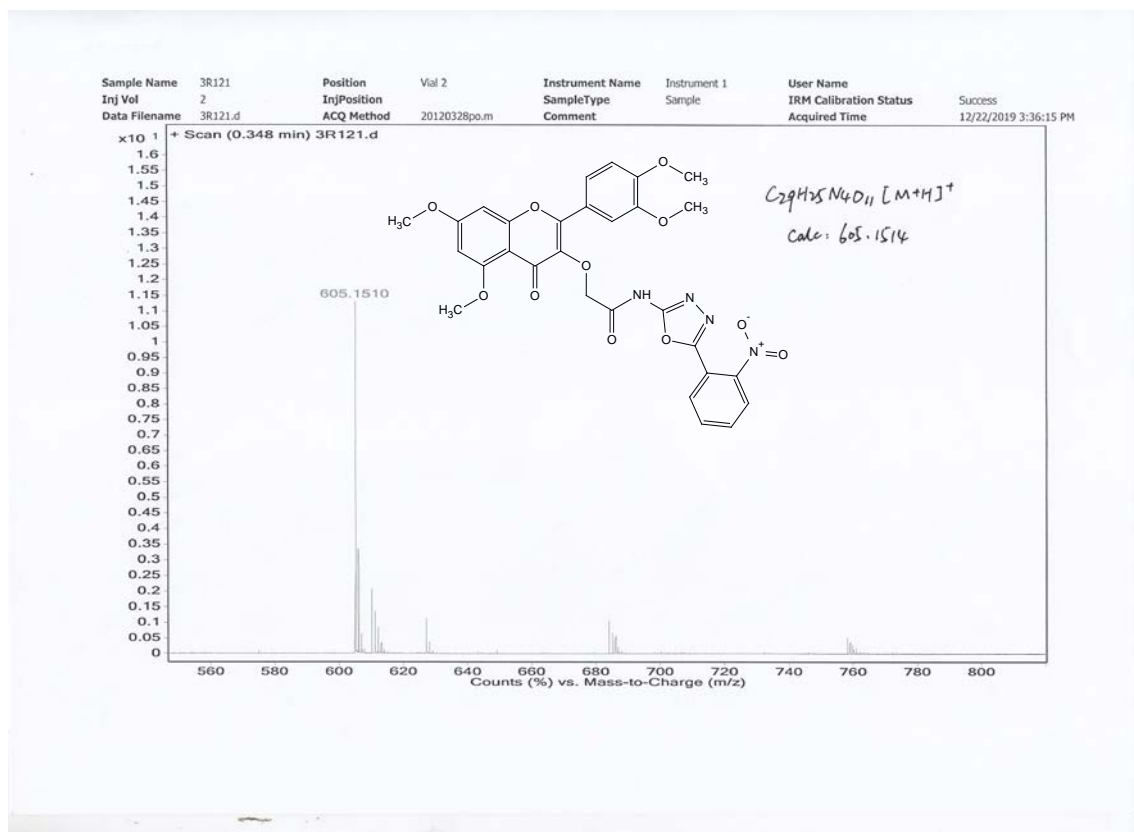

The spectrum of  $^1H$  NMR,  $^{13}C$  NMR and HRMS of compound B15

# B16

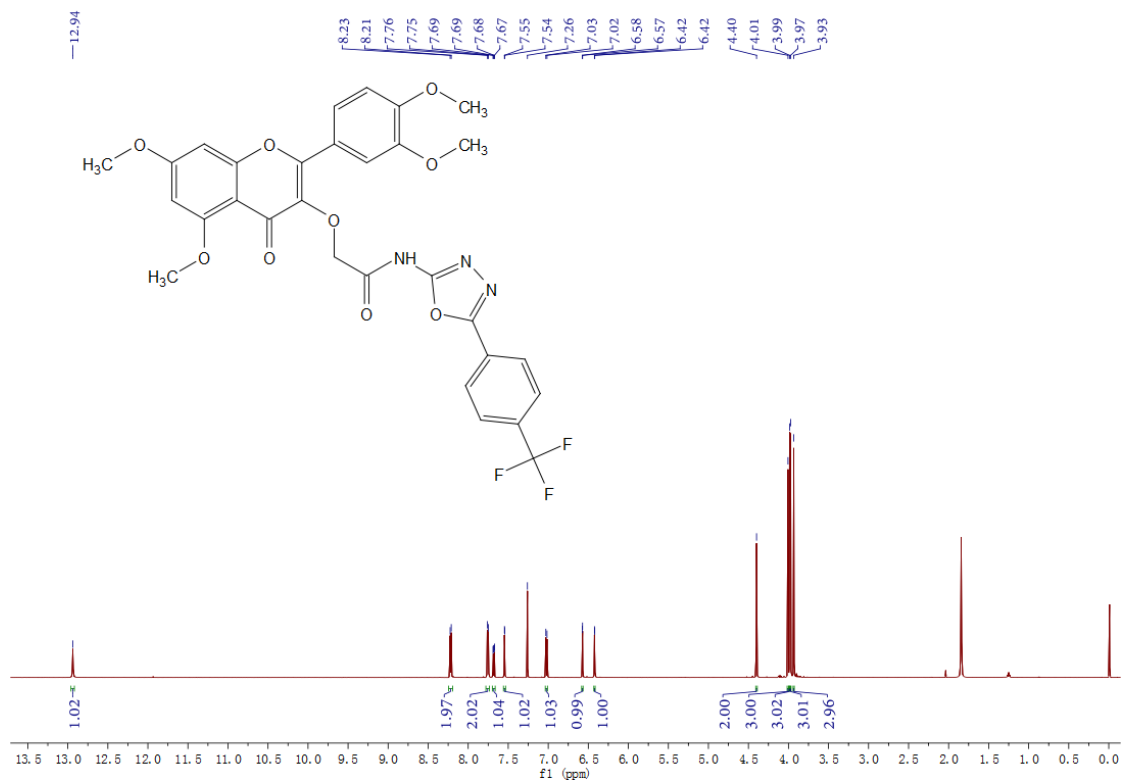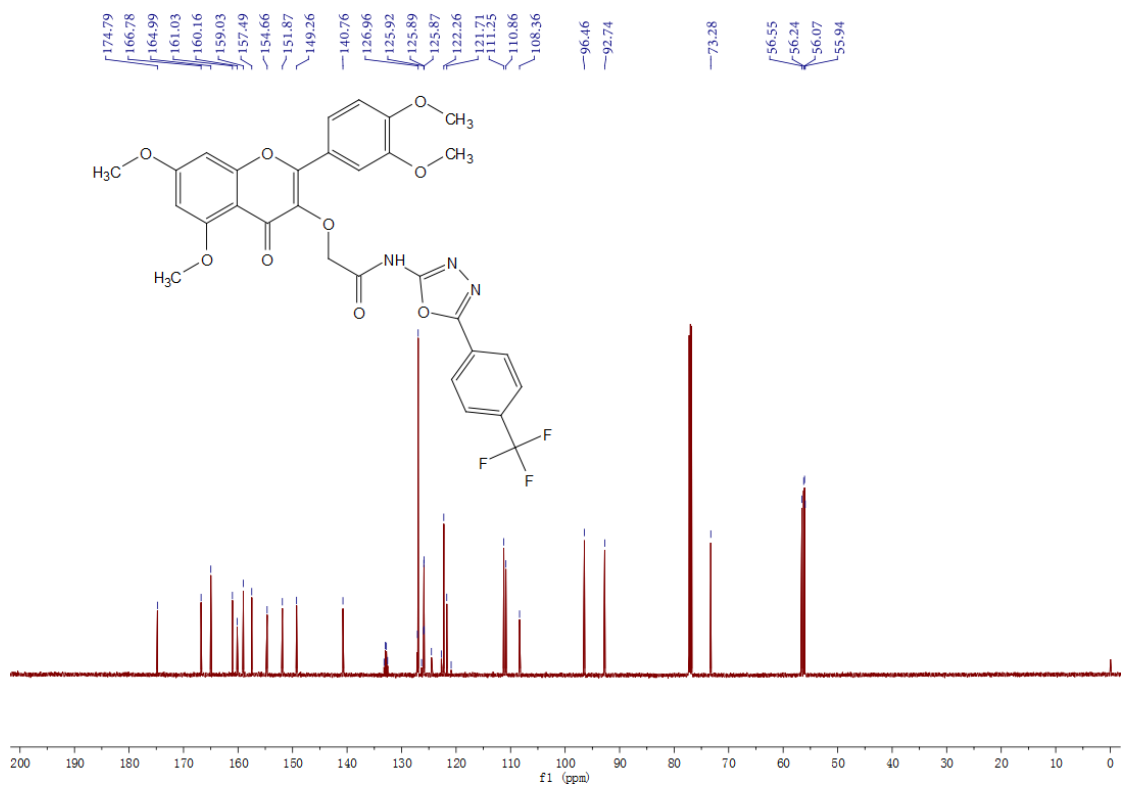

The spectrum of  $^1\text{H}$  NMR and  $^{13}\text{C}$  NMR compound B16

# B17

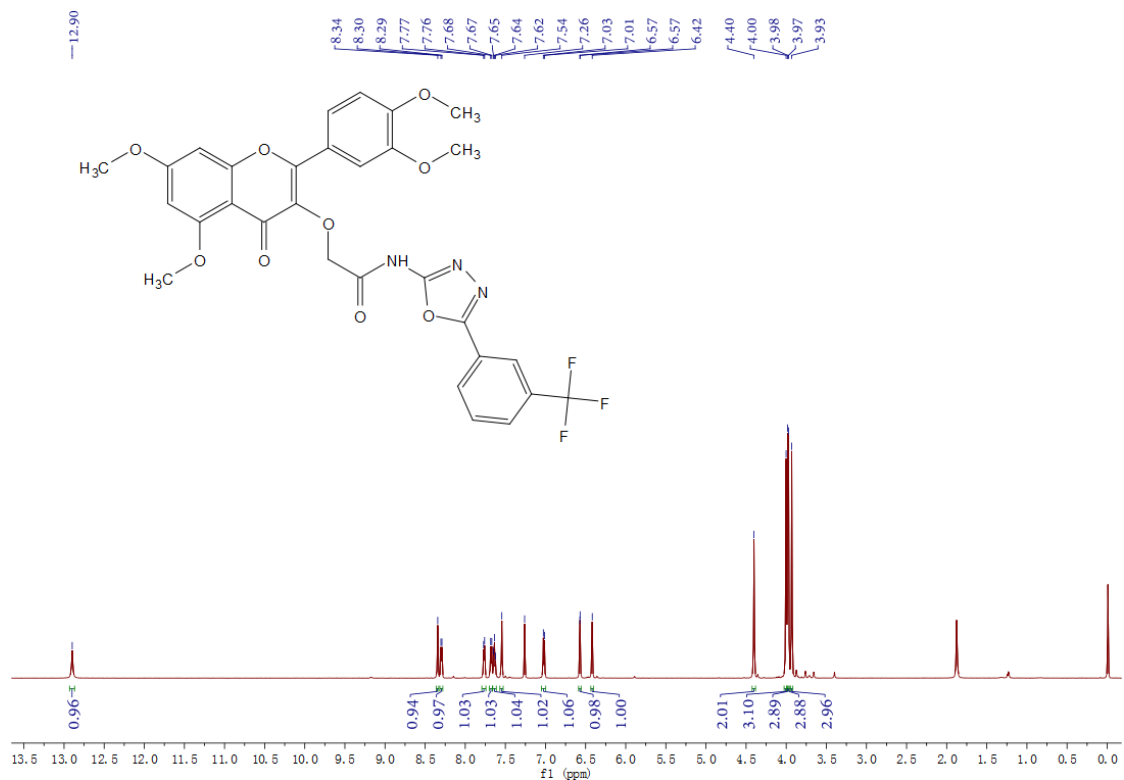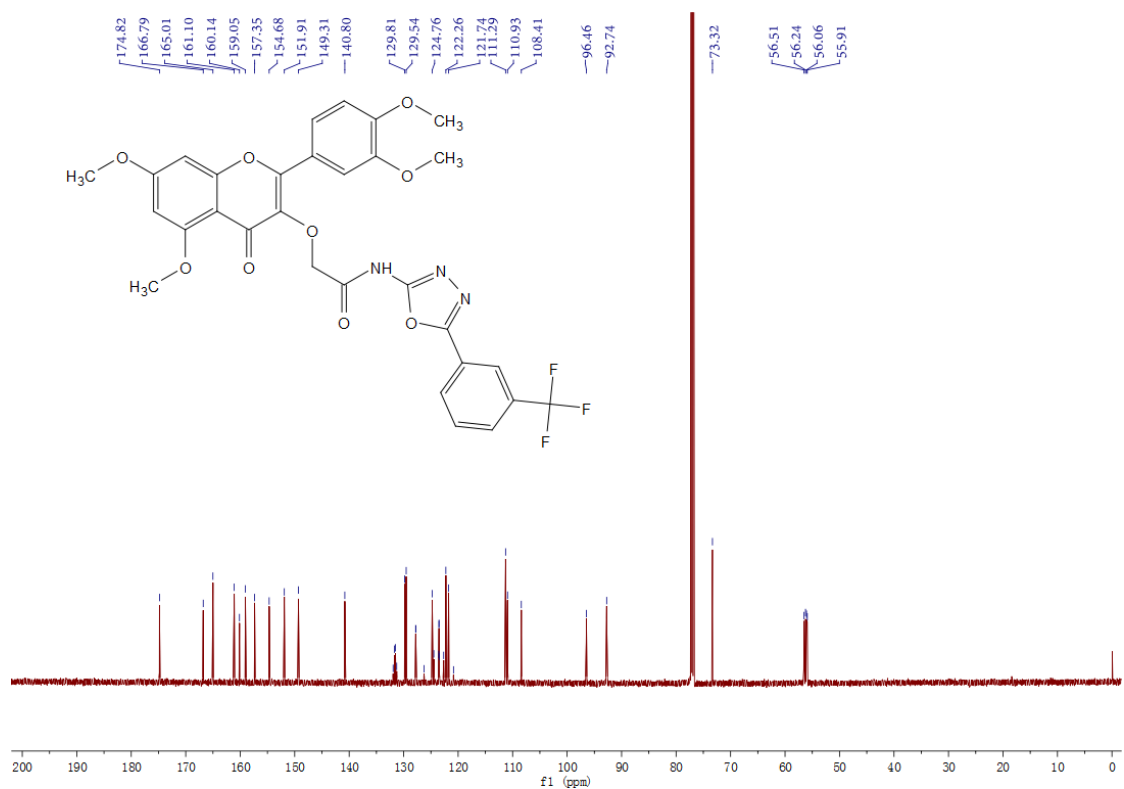

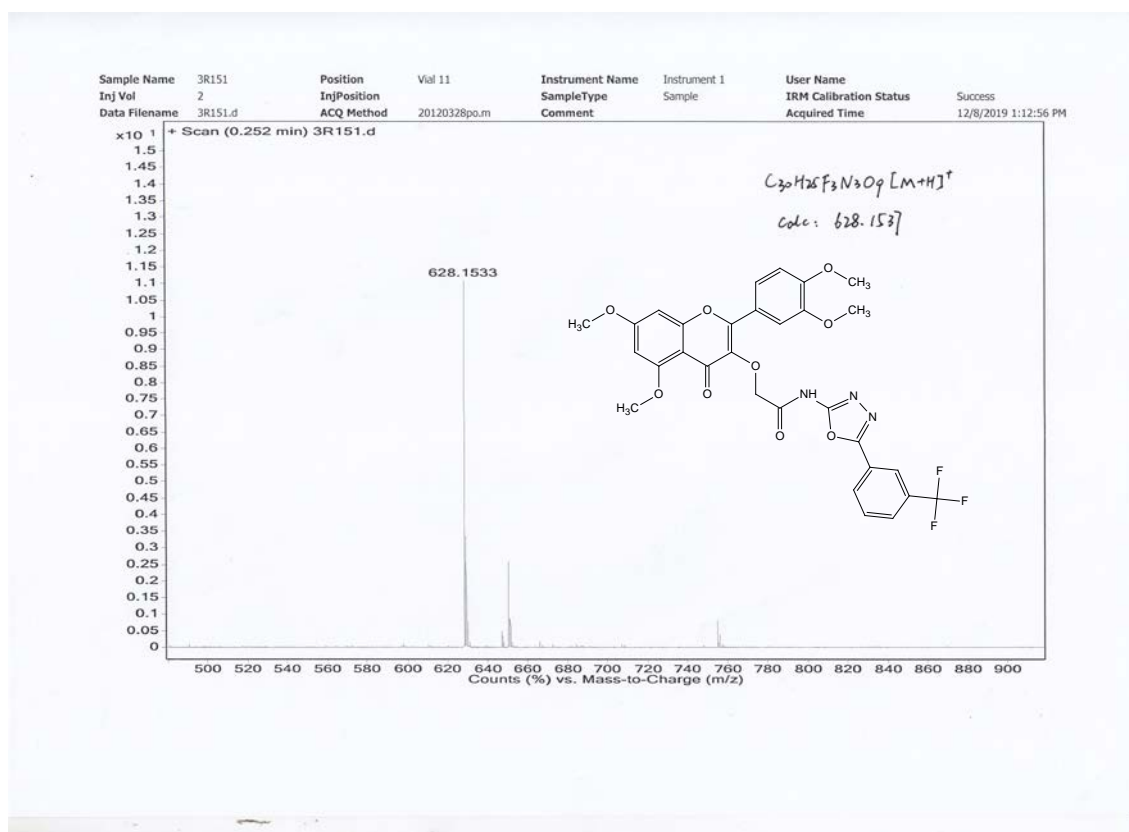

The spectrum of  $^1H$  NMR,  $^{13}C$  NMR and HRMS of compound B17

## B18

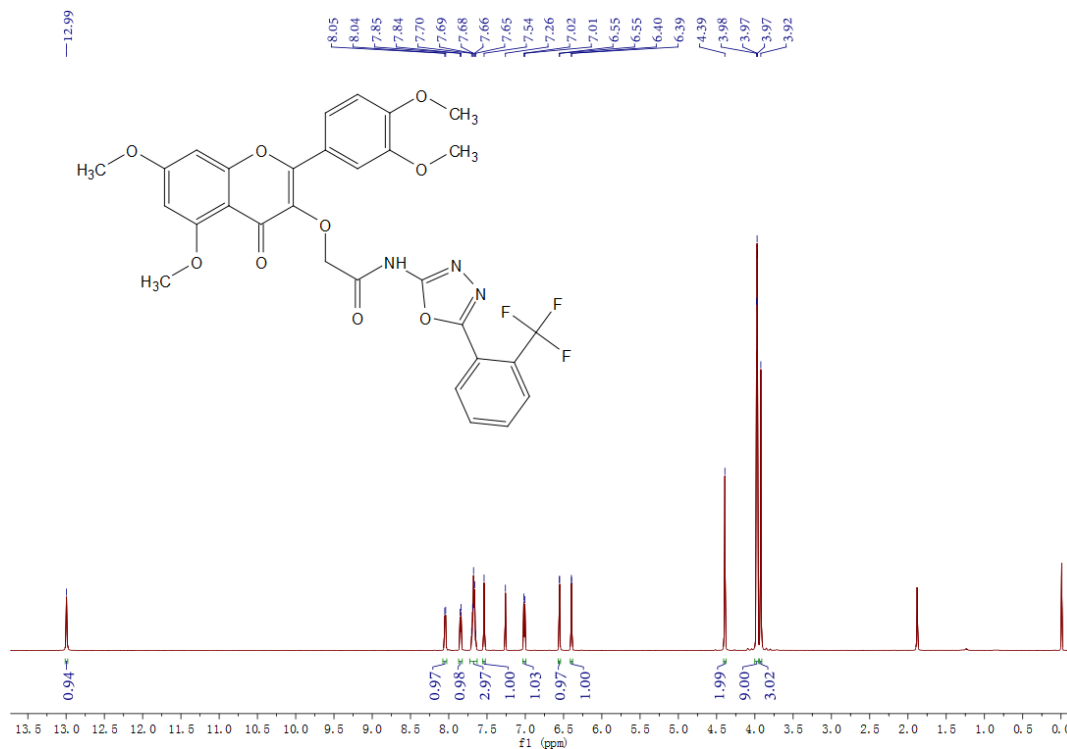

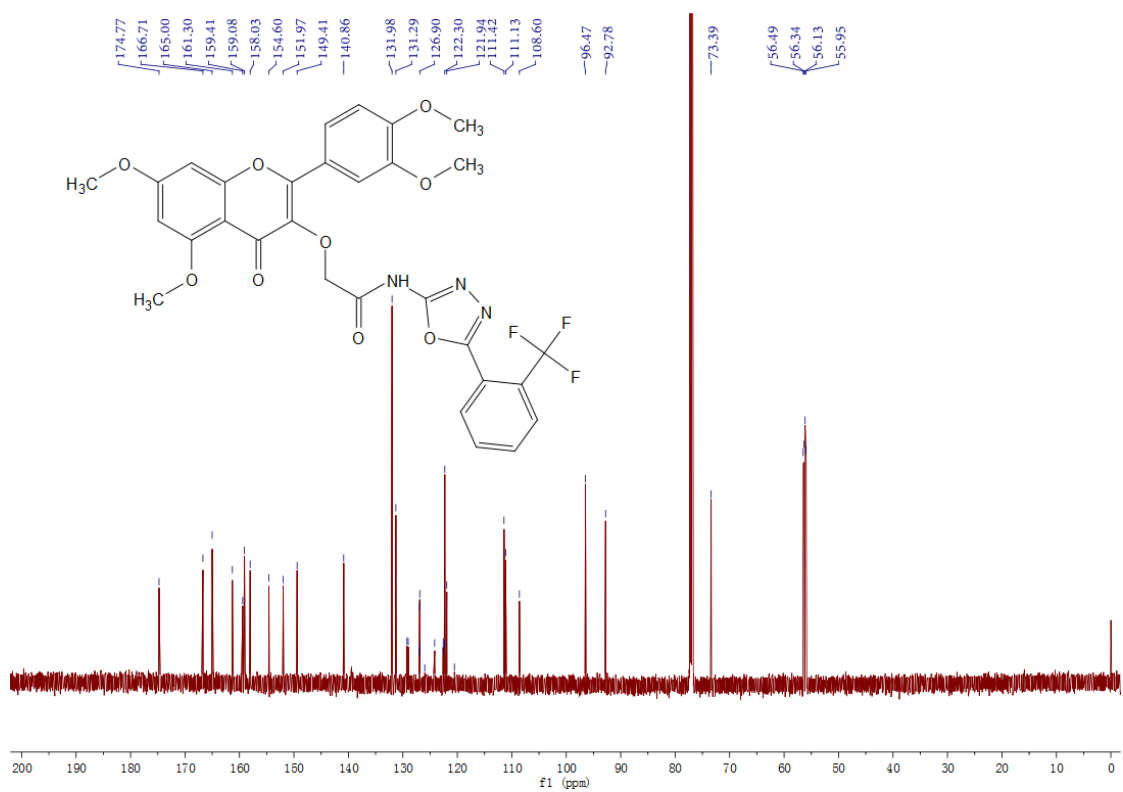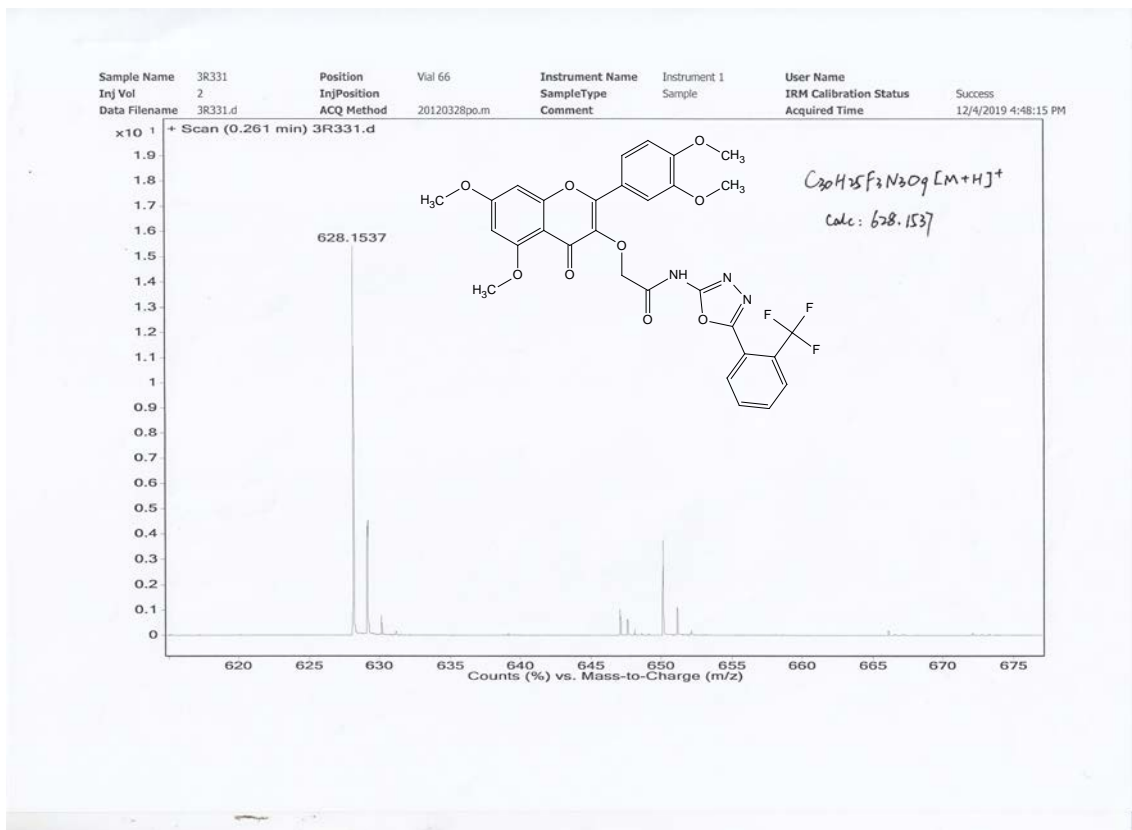

The spectrum of  $^1\text{H}$  NMR,  $^{13}\text{C}$  NMR and HRMS of compound B18

**B19**

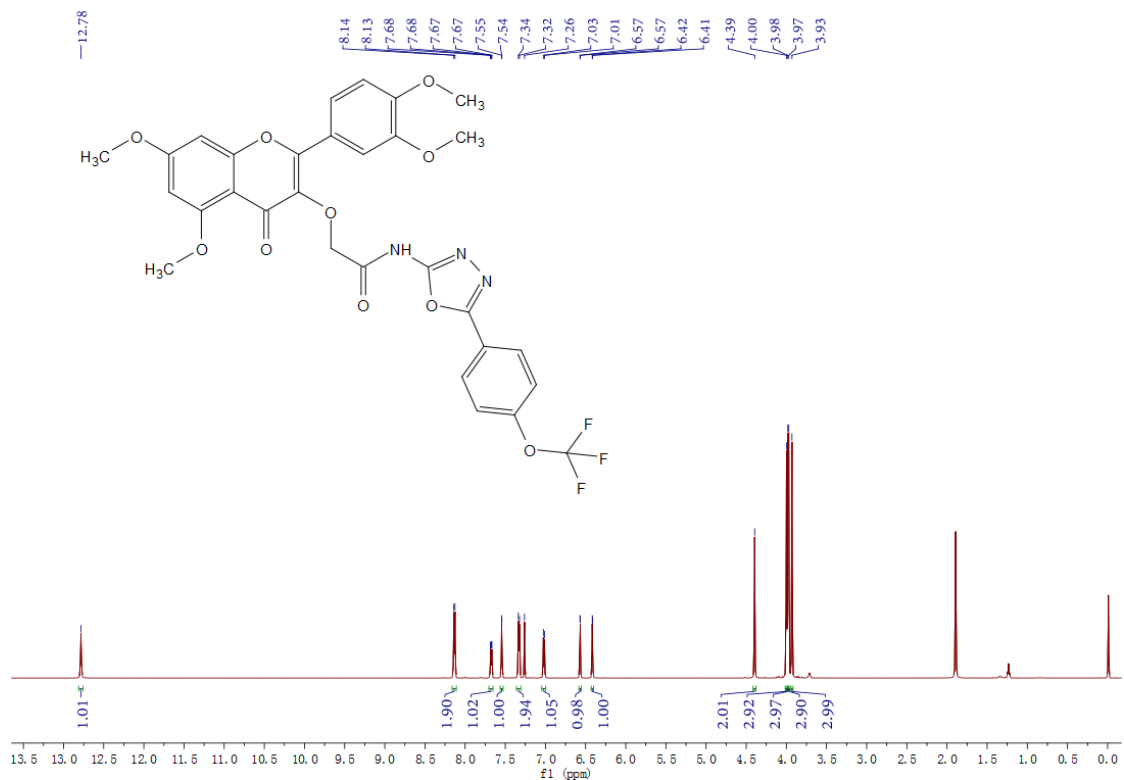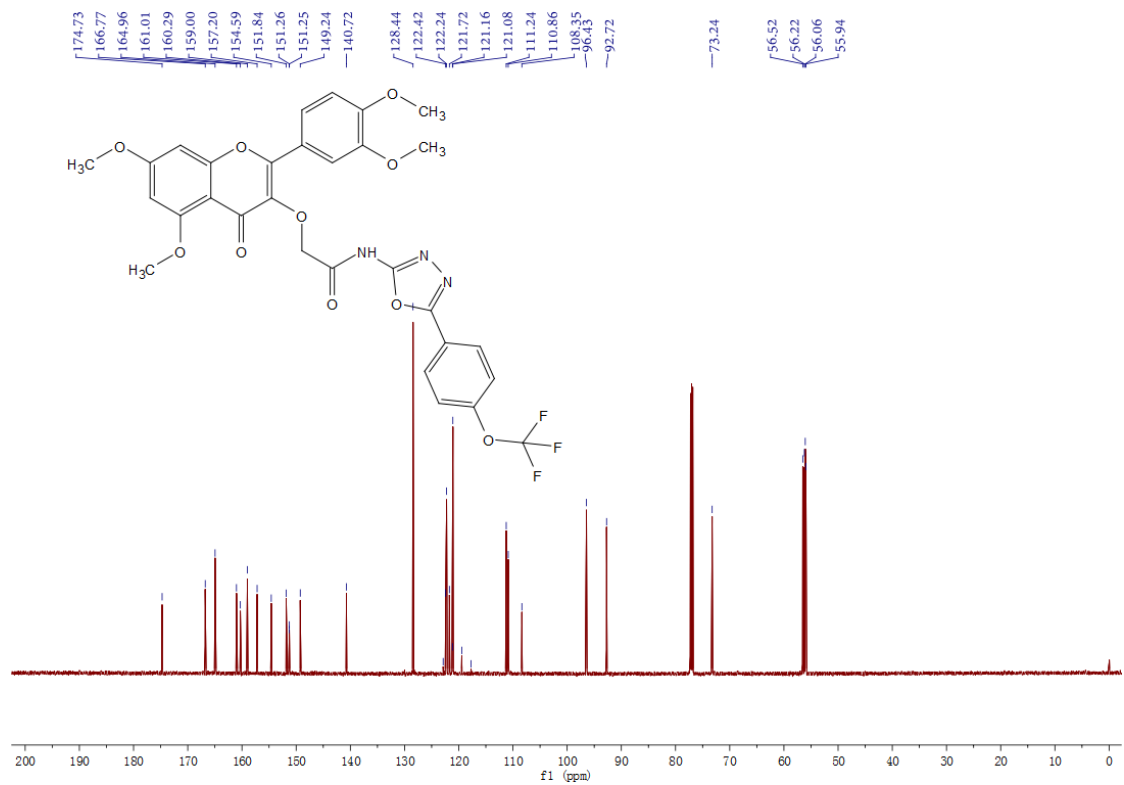

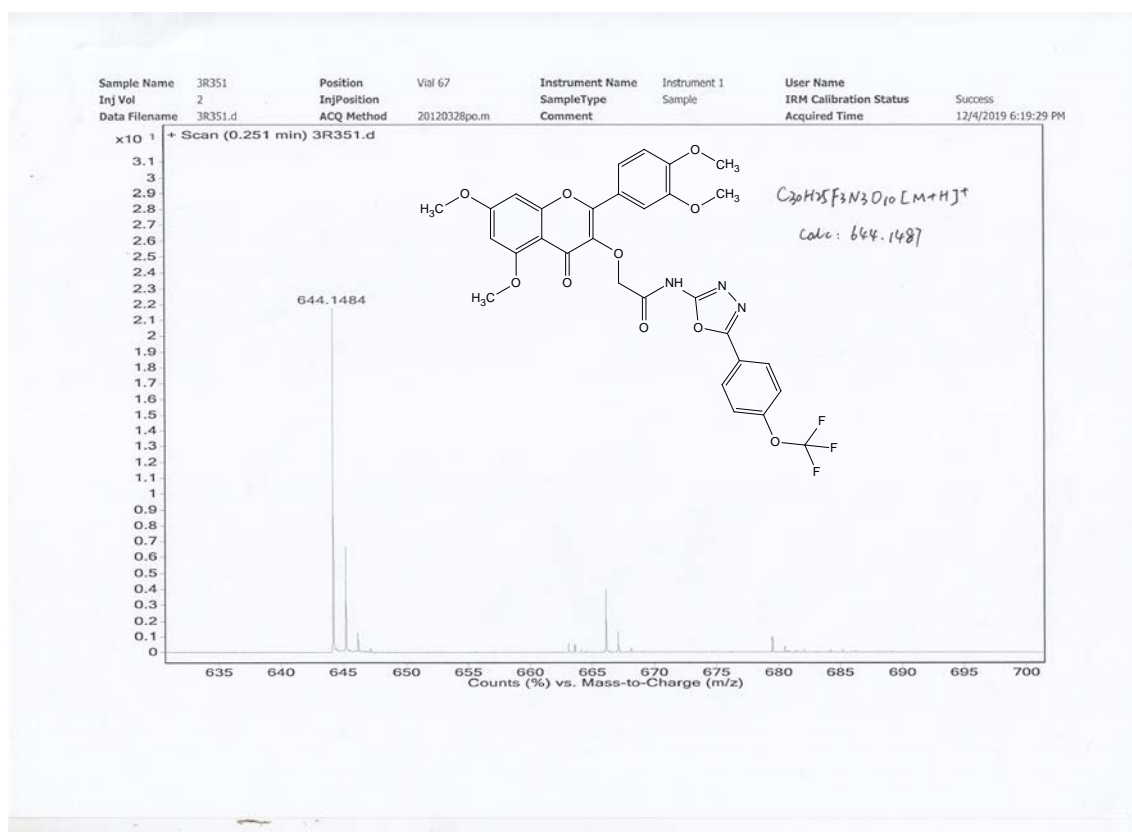

The spectrum of  $^1H$  NMR,  $^{13}C$  NMR and HRMS of compound B19

B20

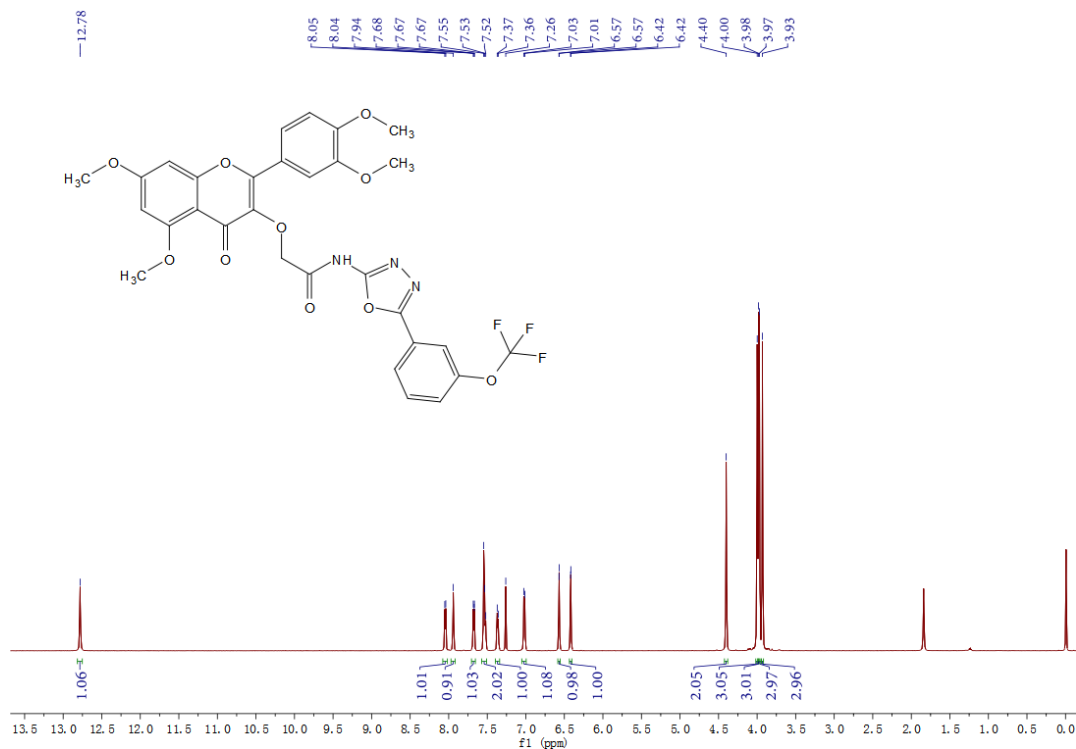

S75



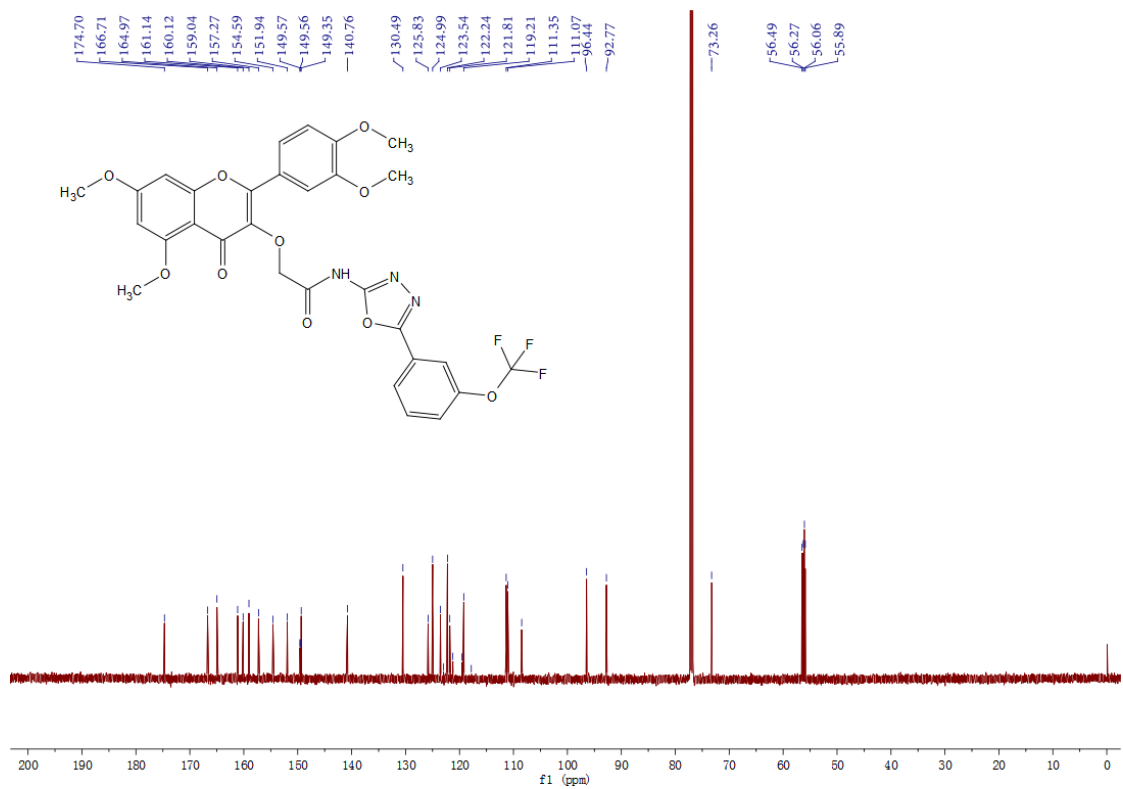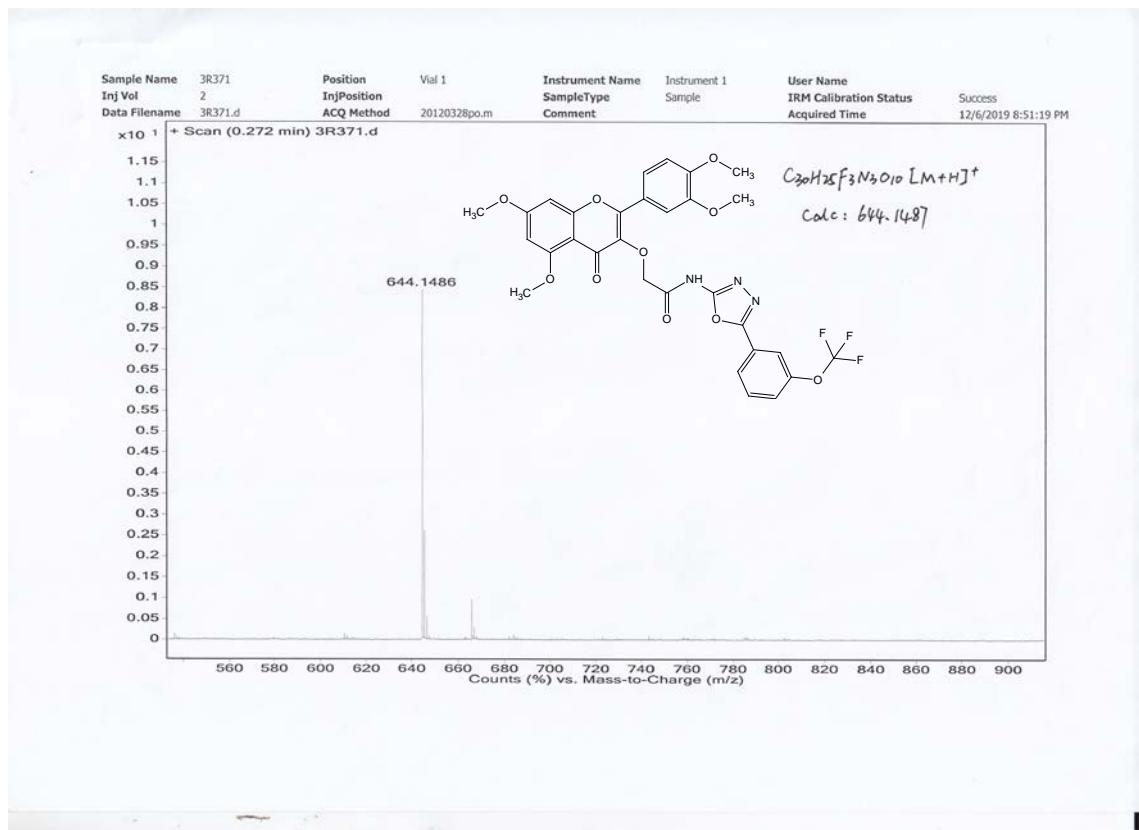

The spectrum of  $^1H$  NMR,  $^{13}C$  NMR and HRMS of compound B20

# B21

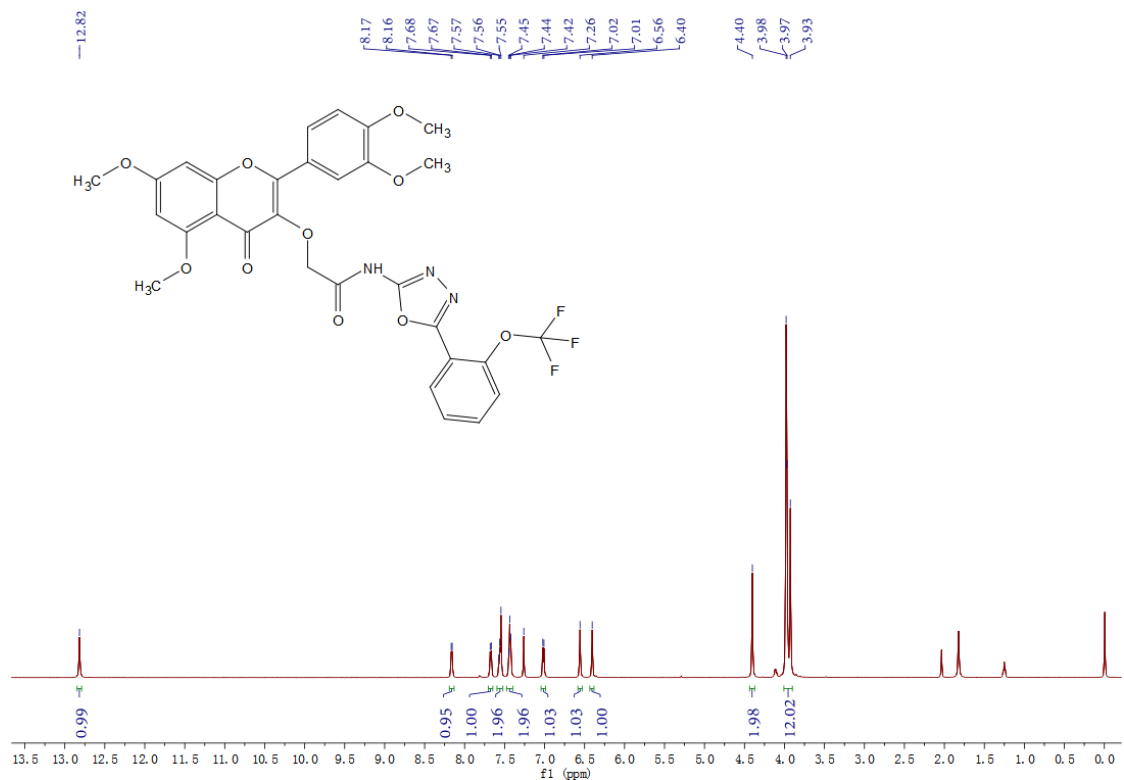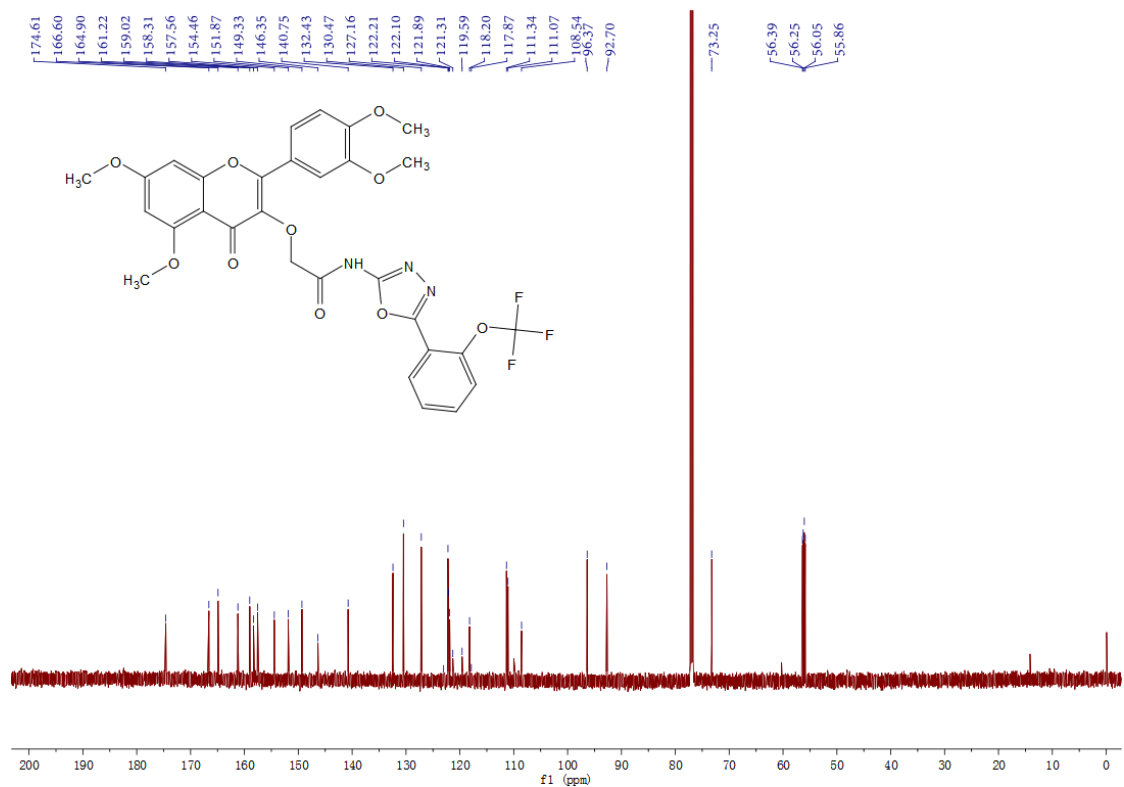

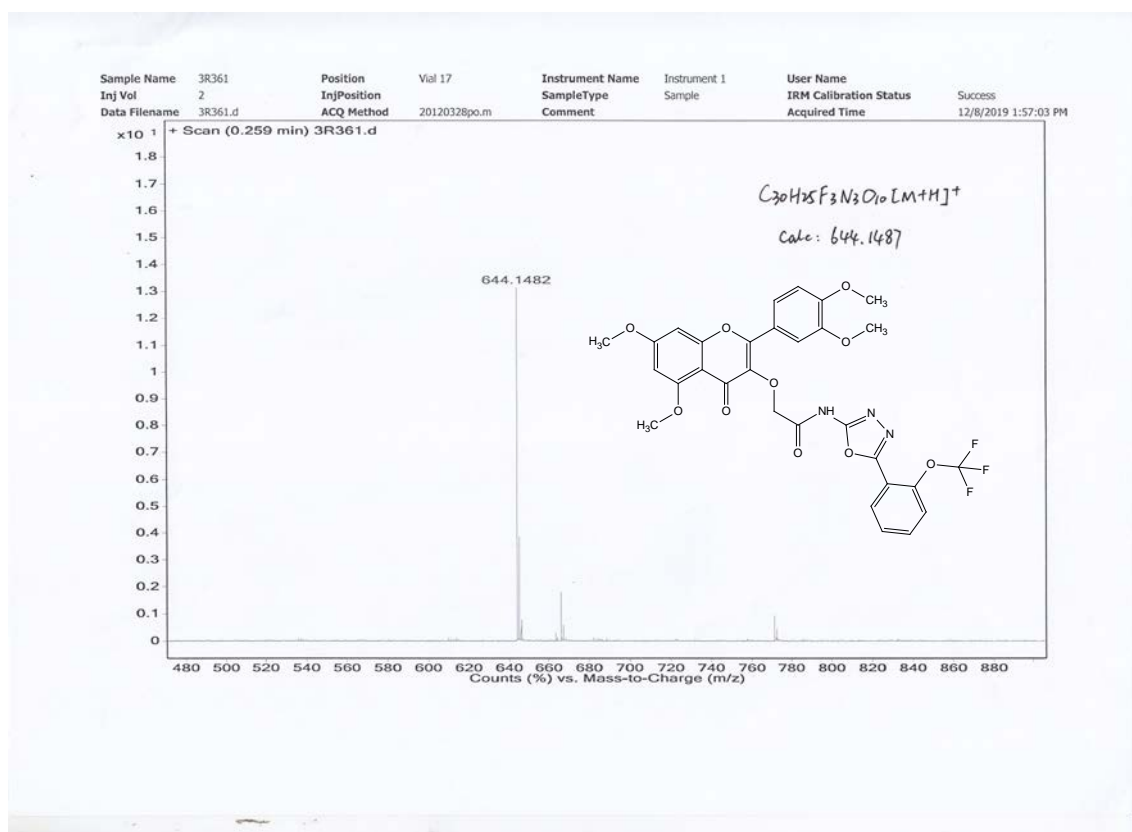

The spectrum of  $^1H$  NMR,  $^{13}C$  NMR and HRMS of compound B21

## B22

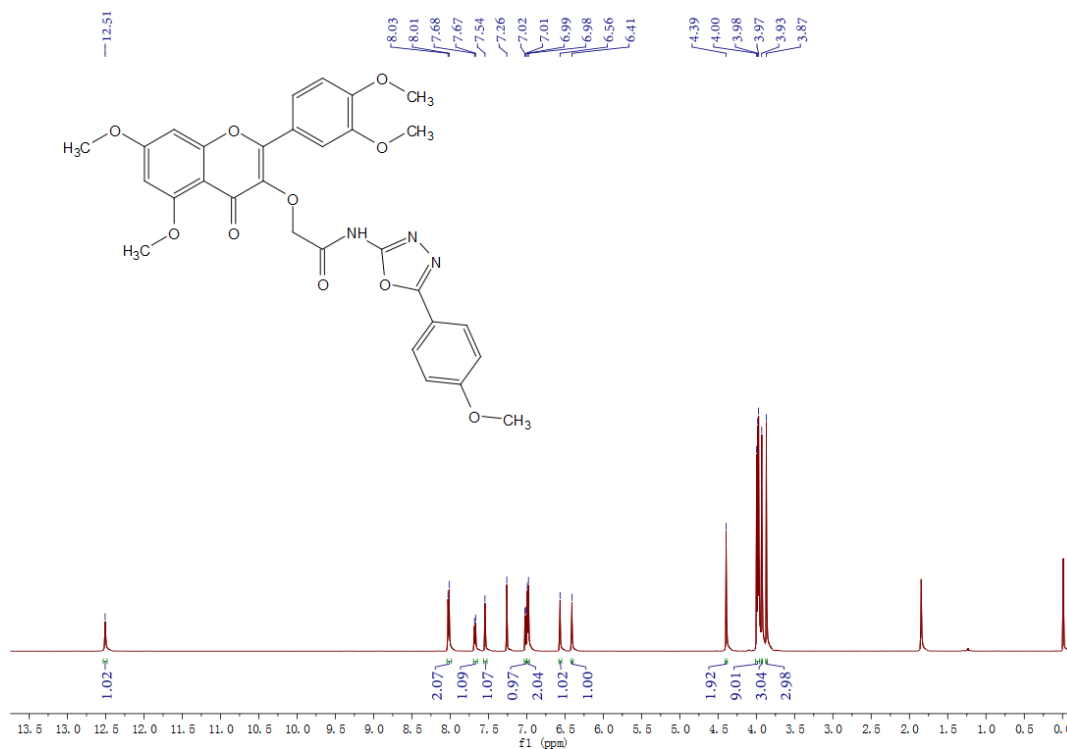

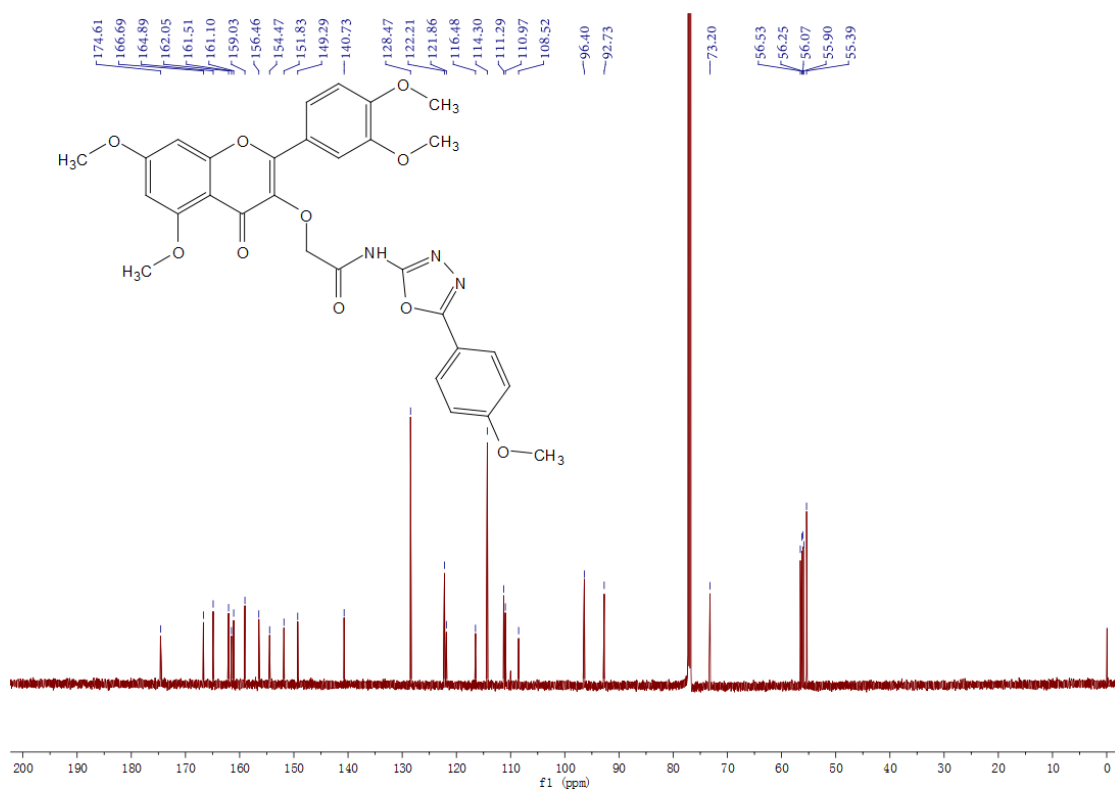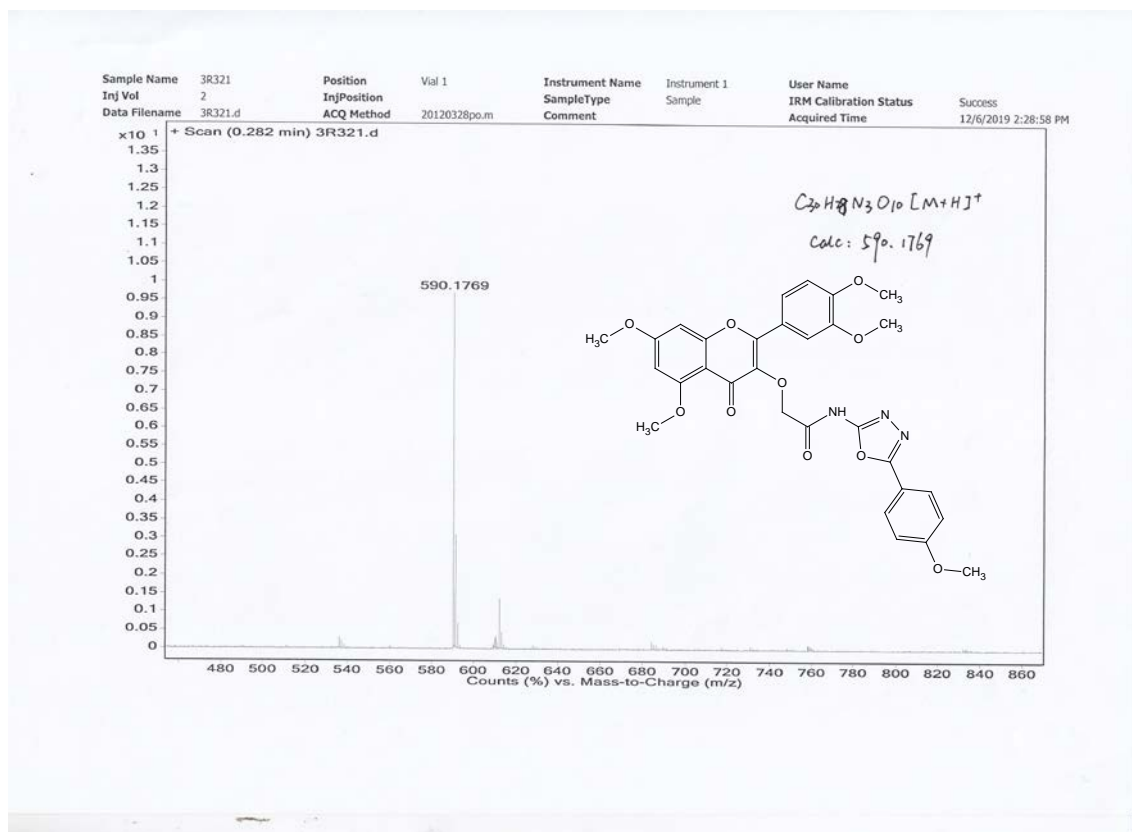

The spectrum of  $^1\text{H}$  NMR,  $^{13}\text{C}$  NMR and HRMS of compound B22

**B23**

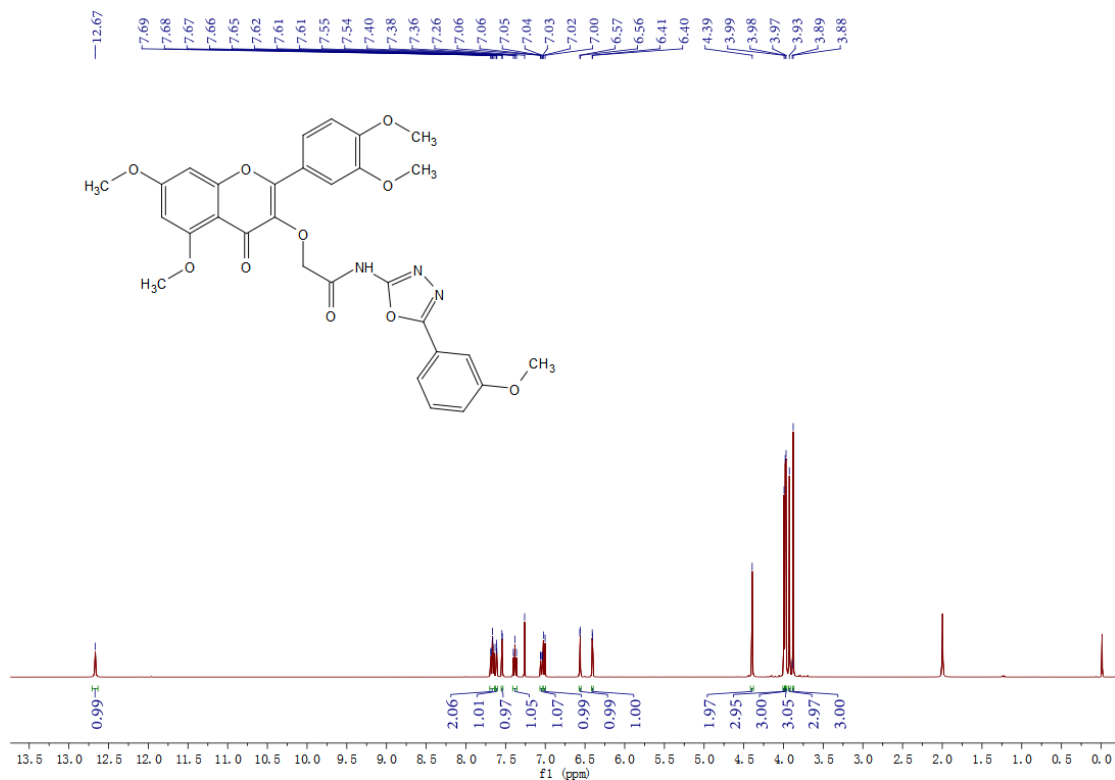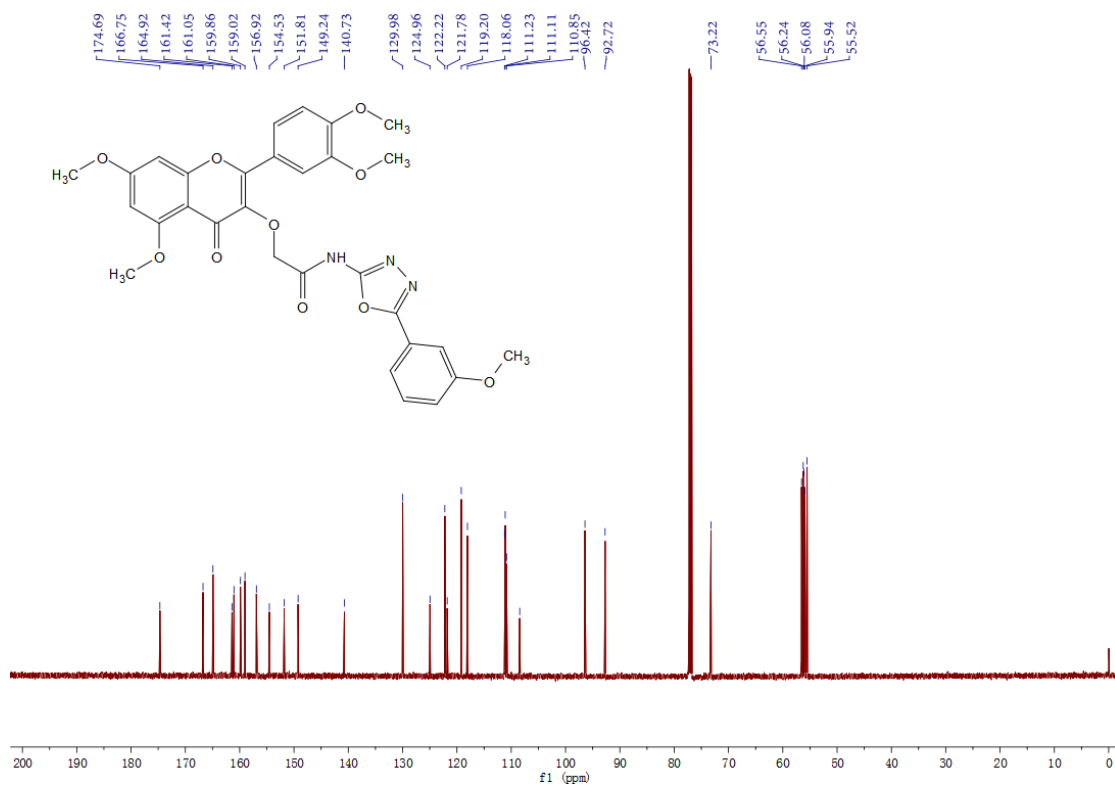

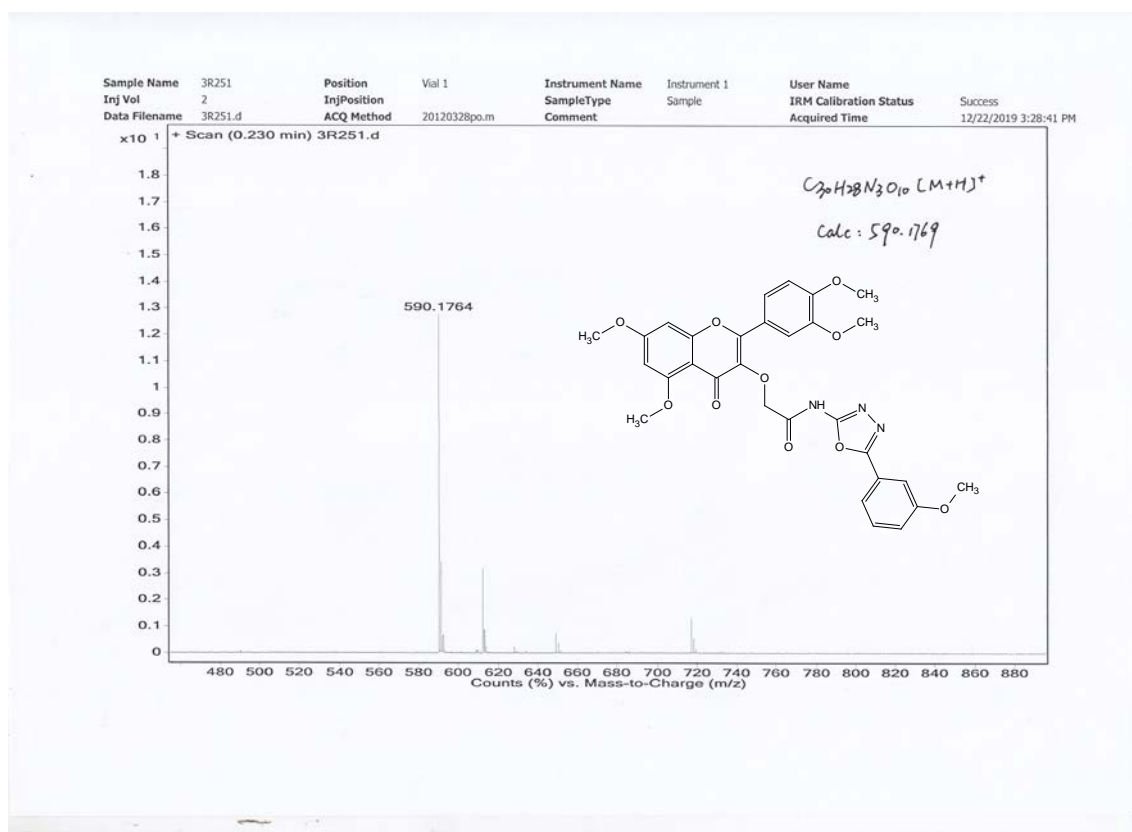

The spectrum of <sup>1</sup>H NMR, <sup>13</sup>C NMR and HRMS of compound B23

B24

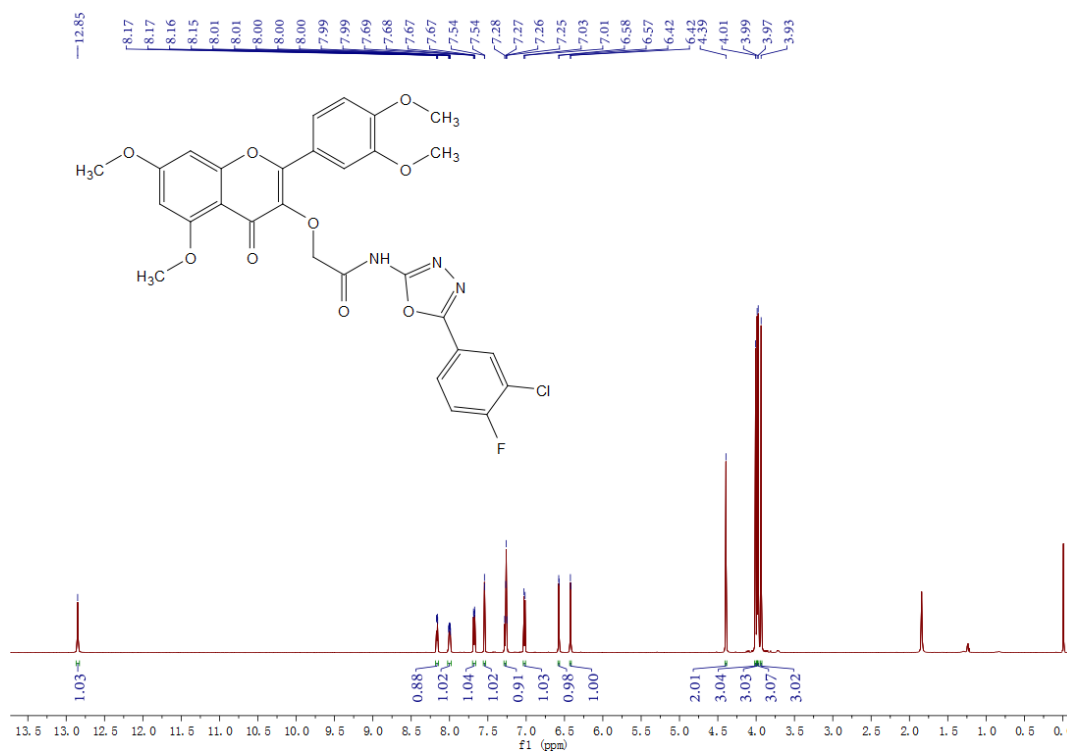

S81

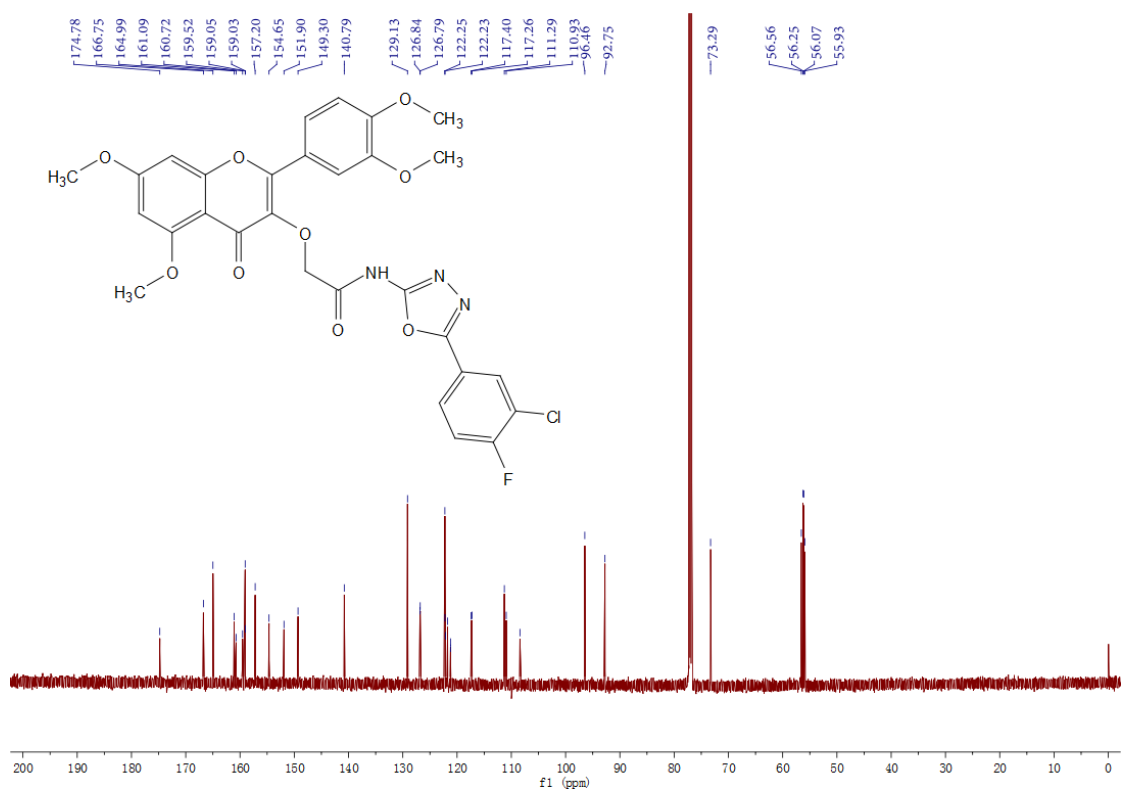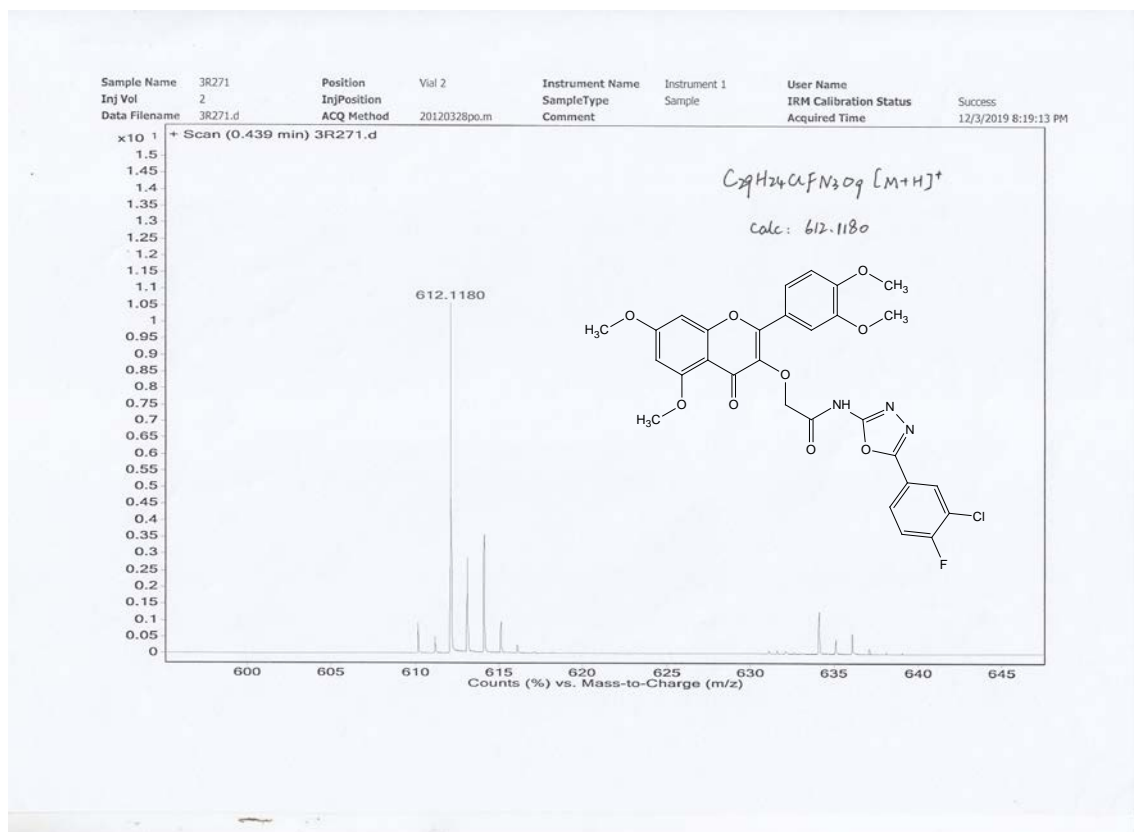

The spectrum of  $^1H$  NMR,  $^{13}C$  NMR and HRMS of compound B24

# B25

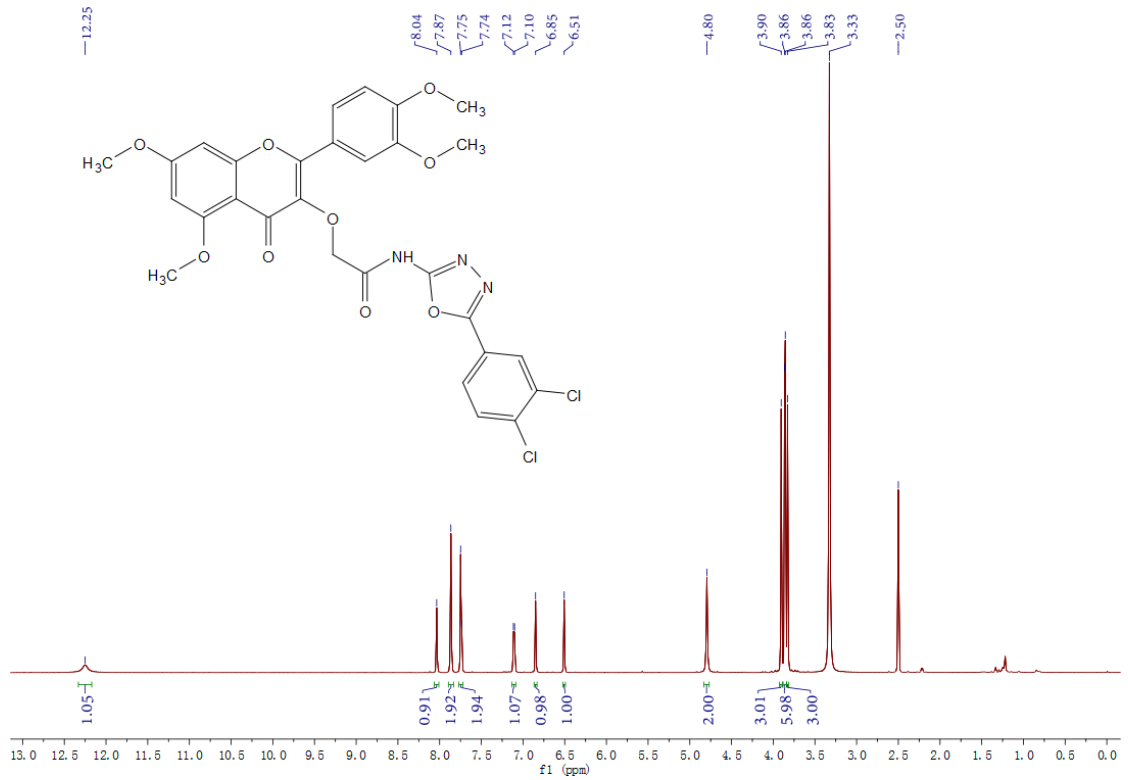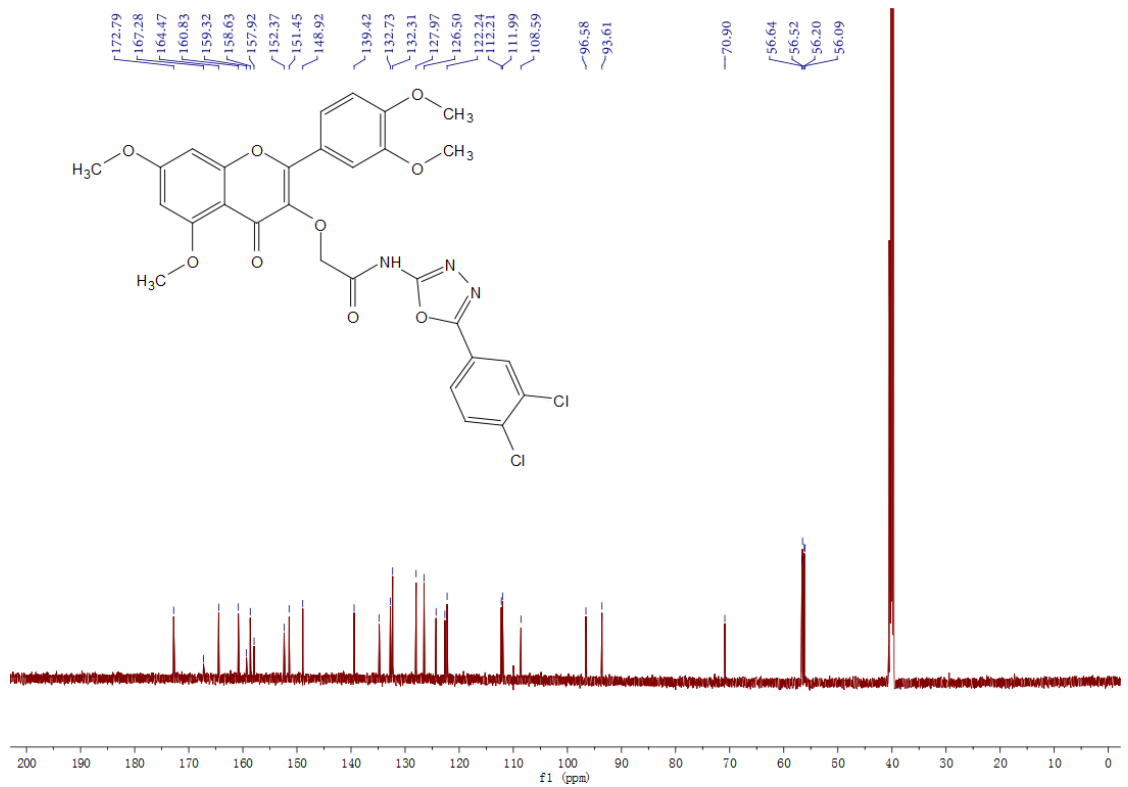



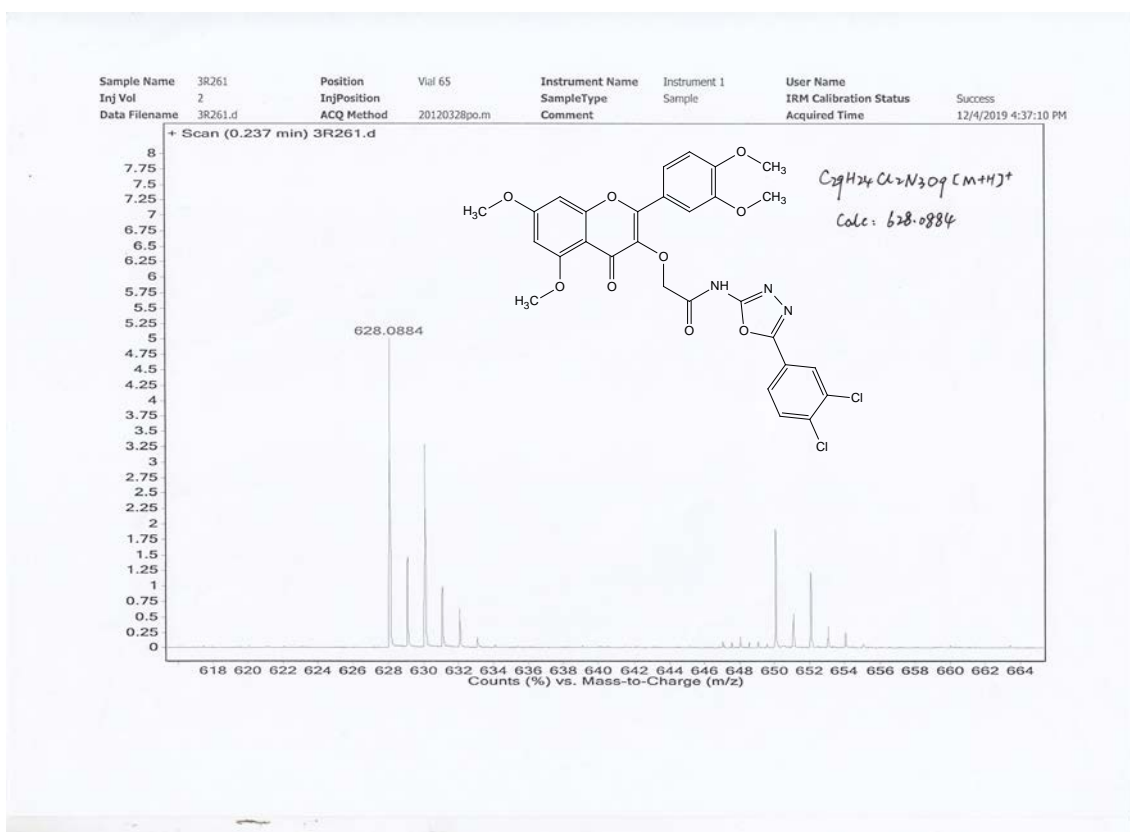

The spectrum of  $^1\text{H}$  NMR,  $^{13}\text{C}$  NMR and HRMS of compound B25

## B26

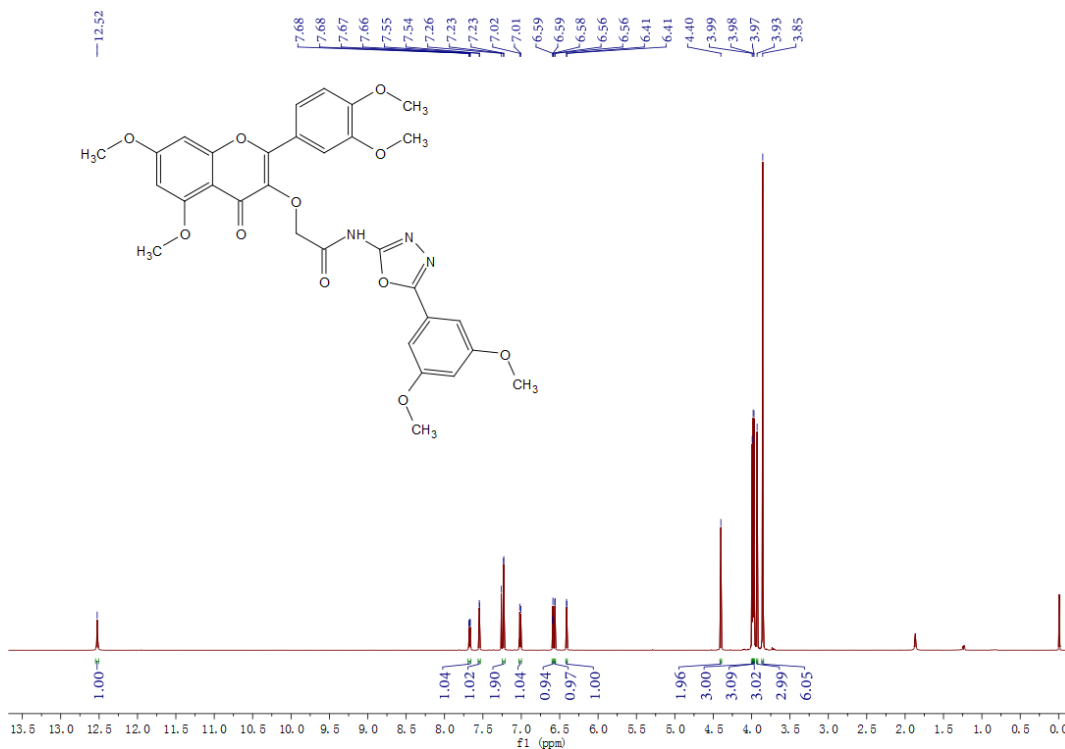

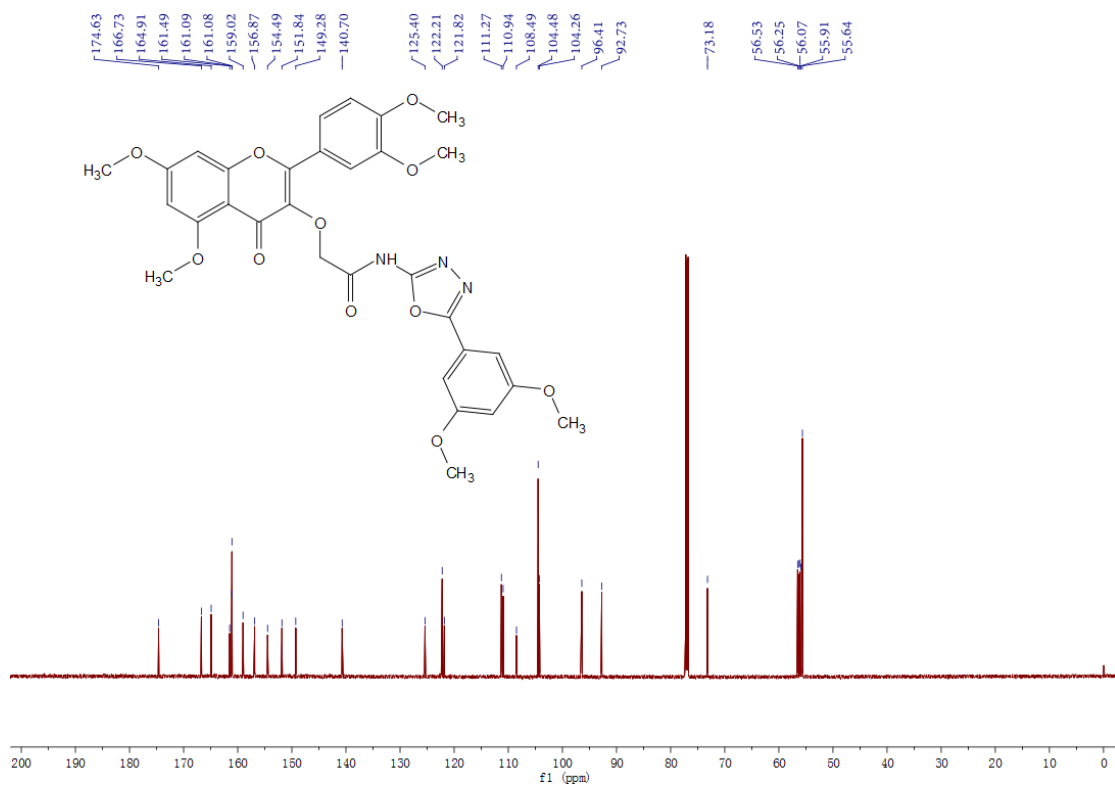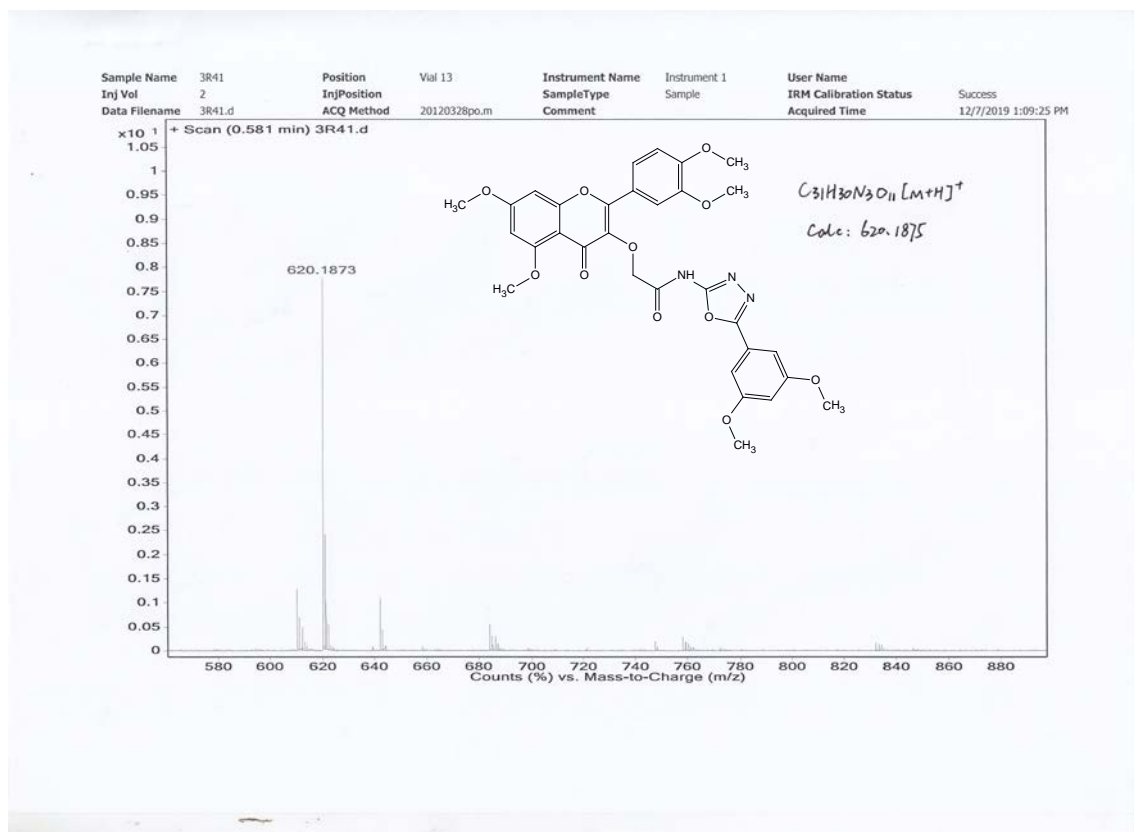

The spectrum of  $^1H$  NMR,  $^{13}C$  NMR and HRMS of compound B26

# B27

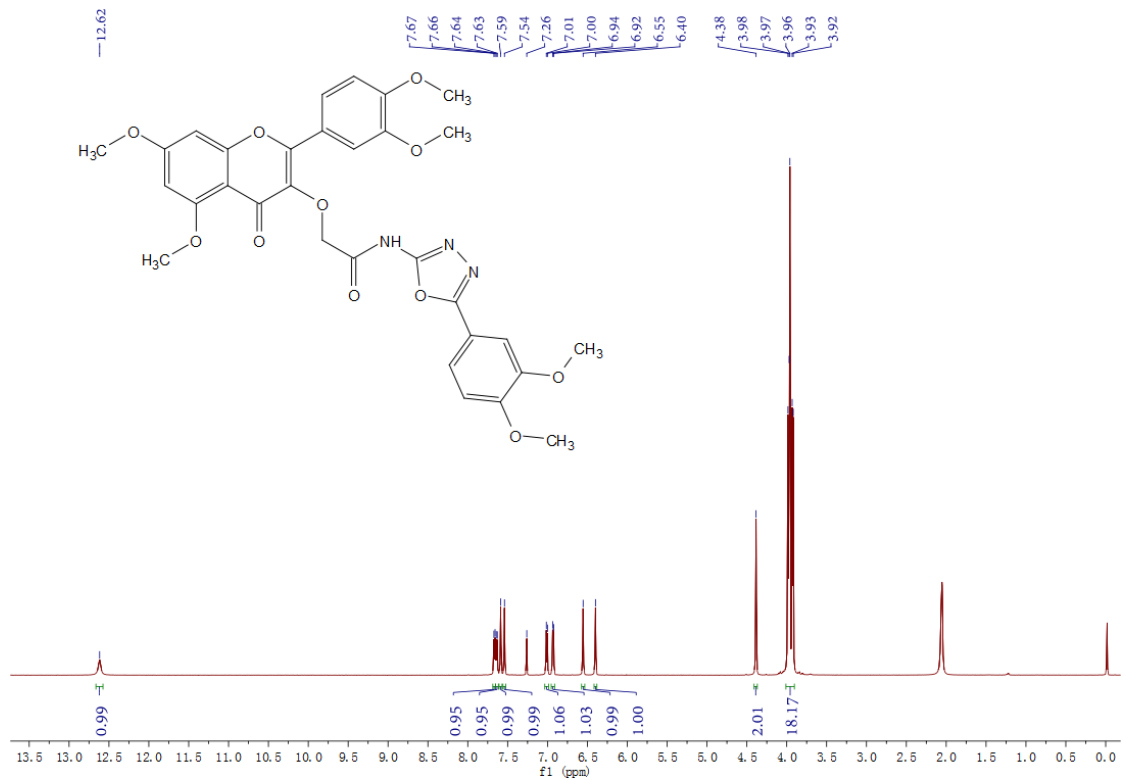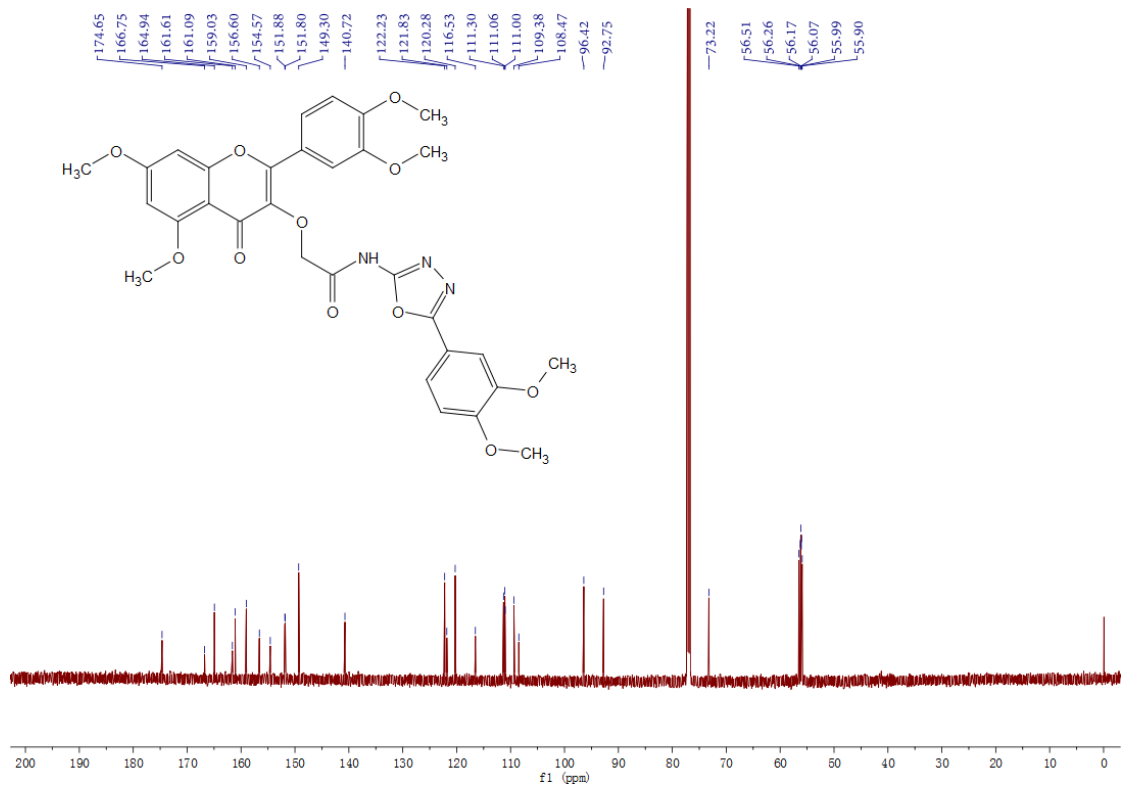

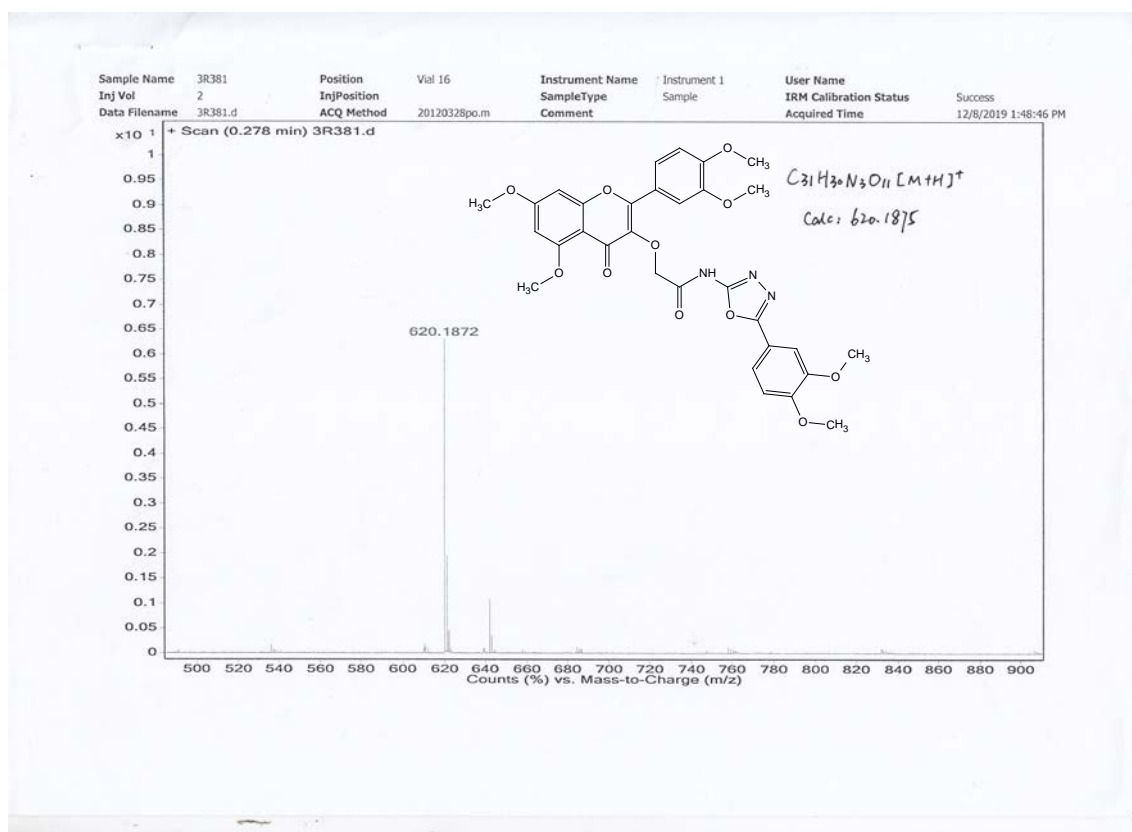

The spectrum of  $^1H$  NMR,  $^{13}C$  NMR and HRMS of compound B27

B28

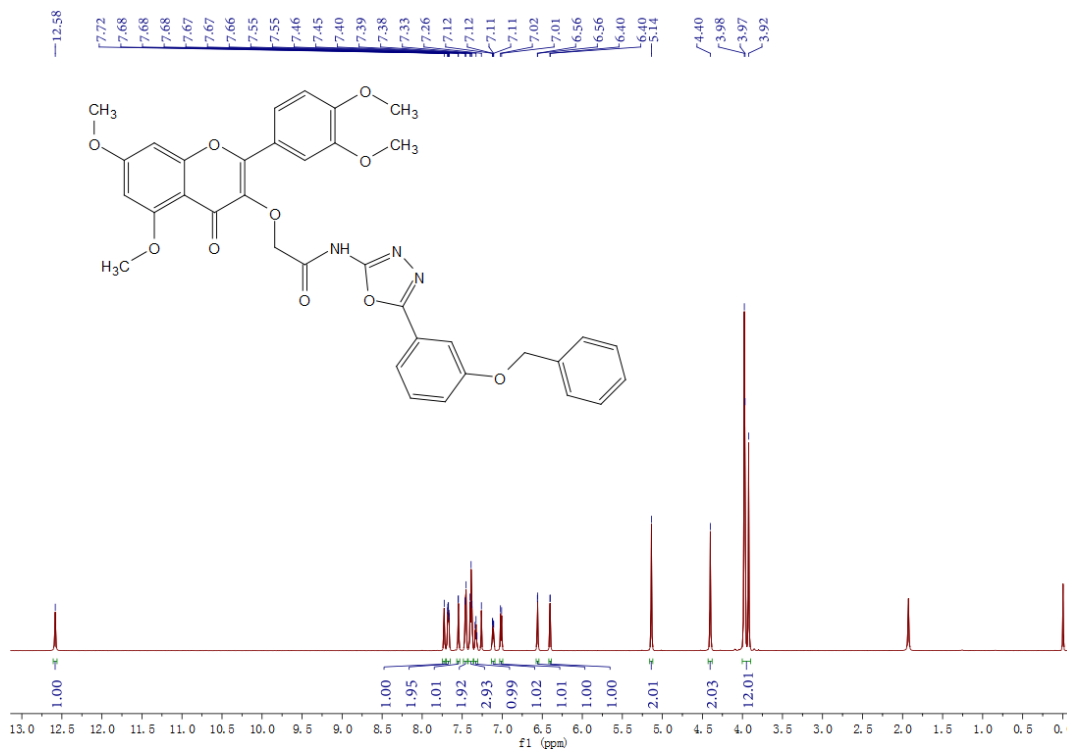

S87

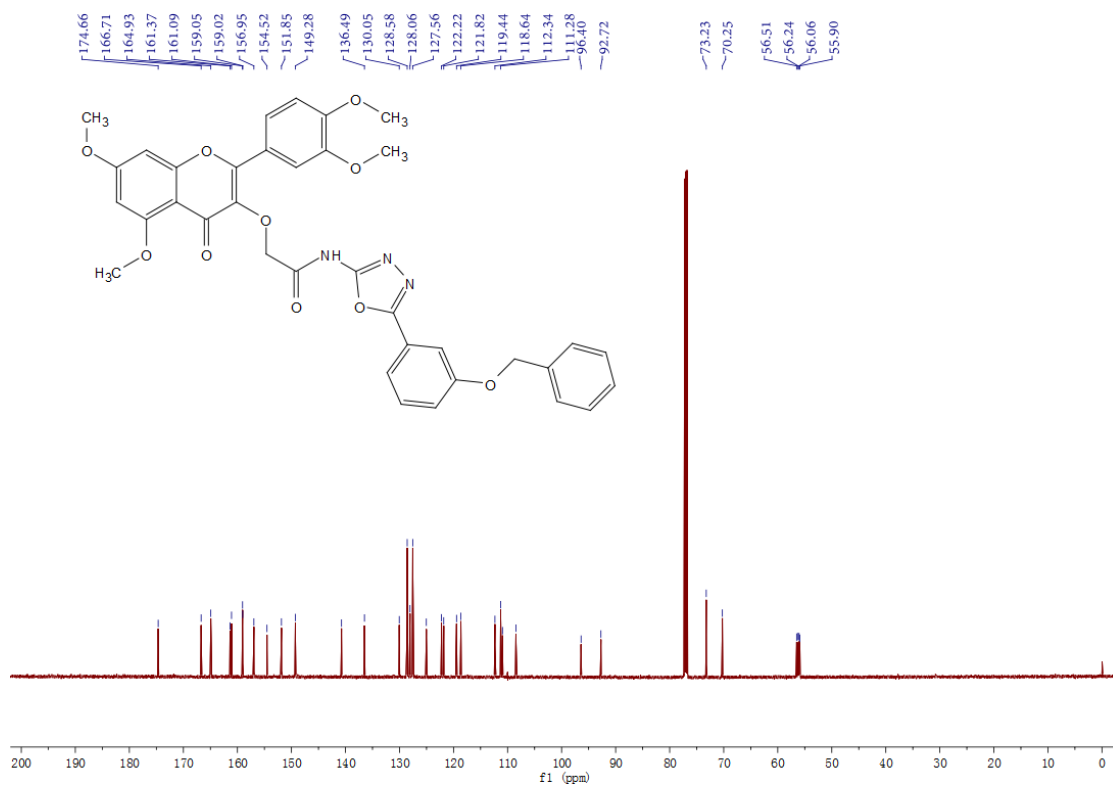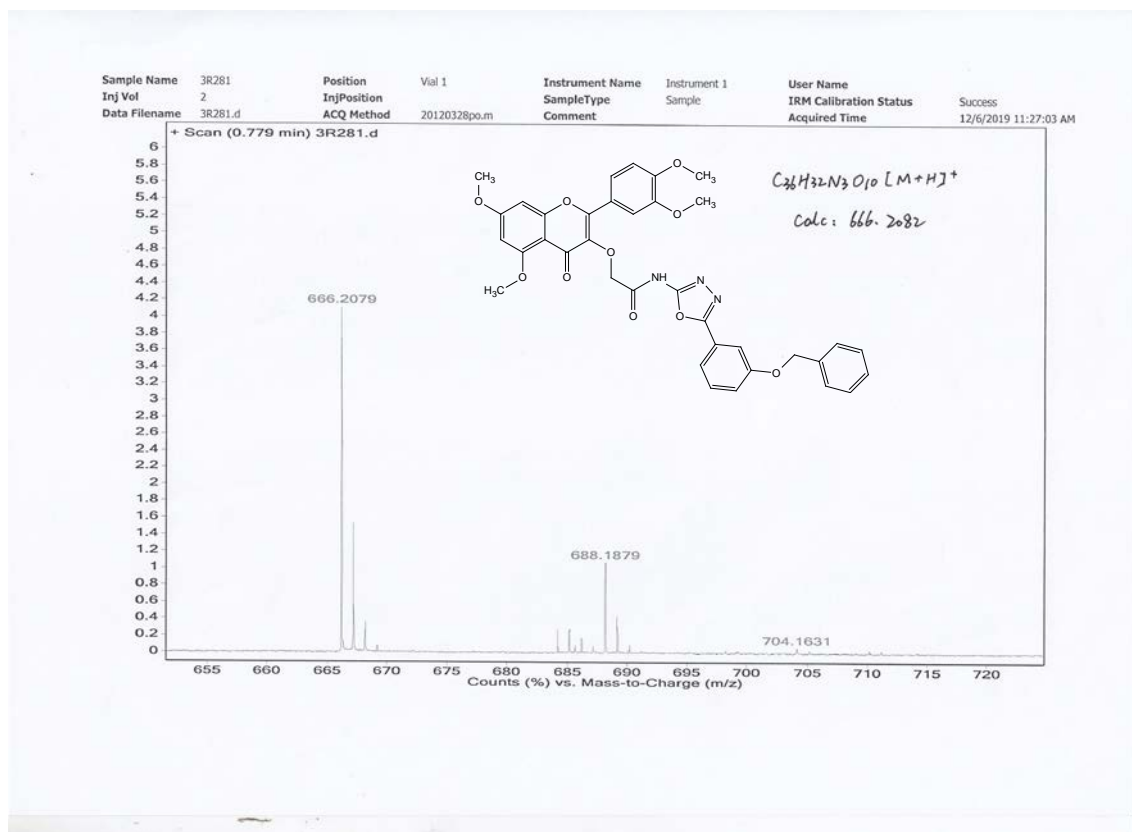

The spectrum of  $^1\text{H}$  NMR,  $^{13}\text{C}$  NMR and HRMS of compound B28

B29

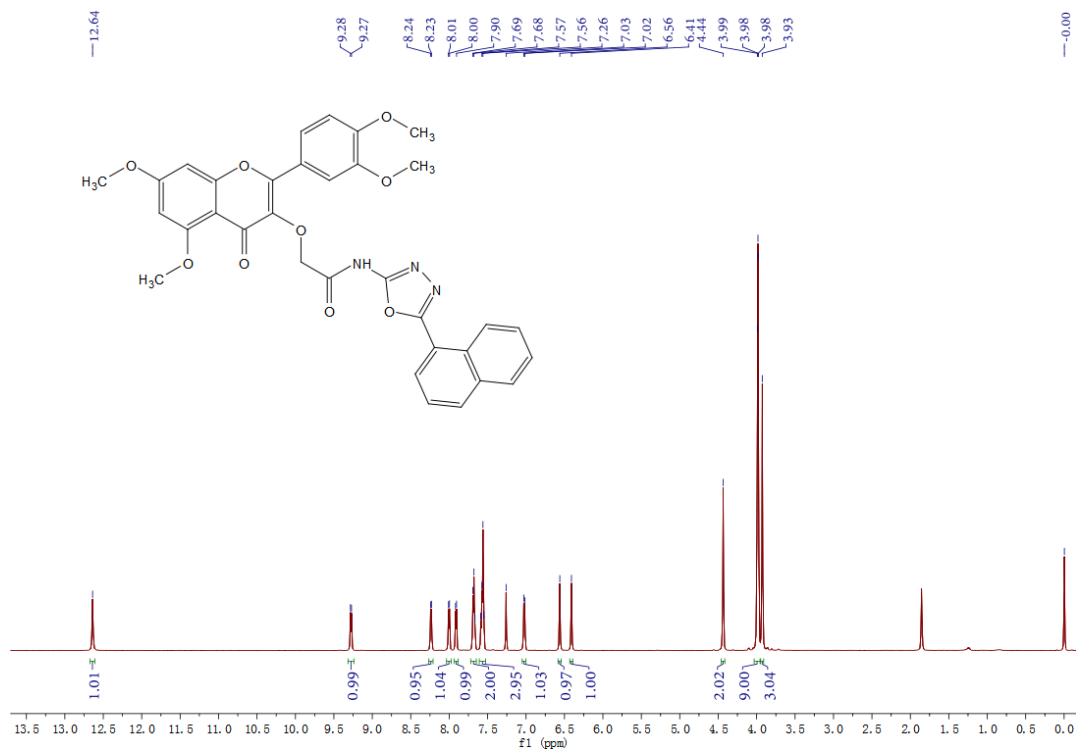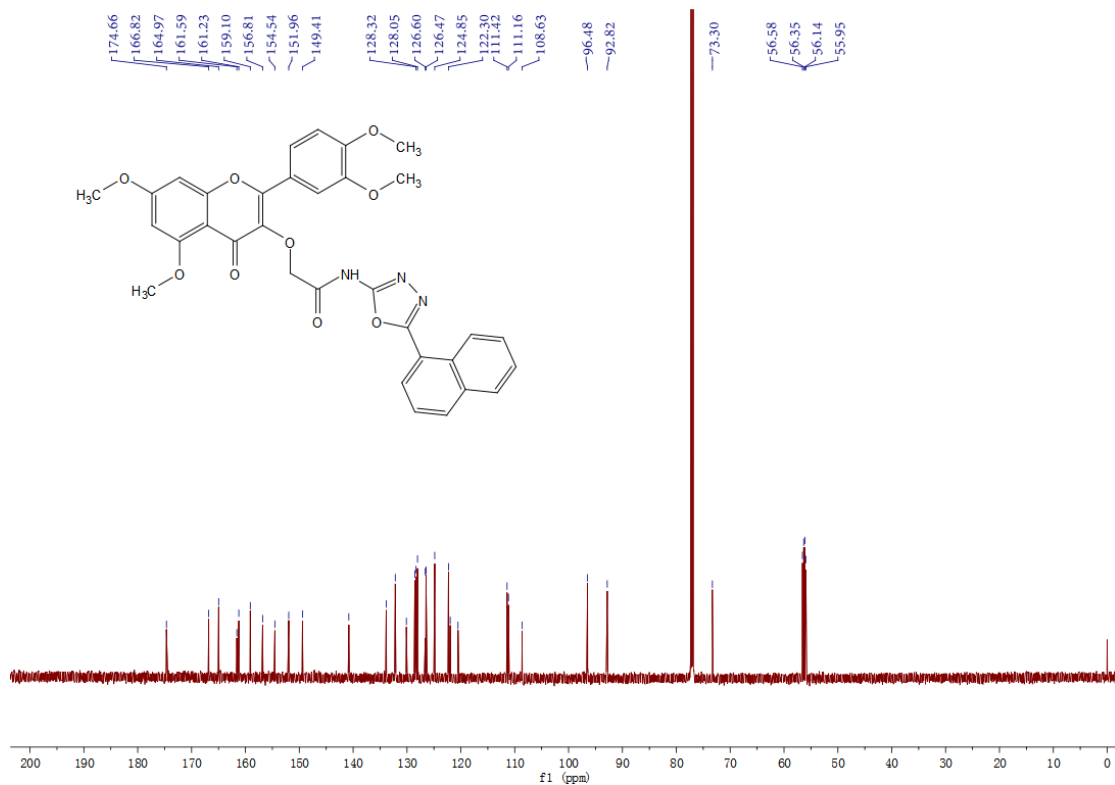

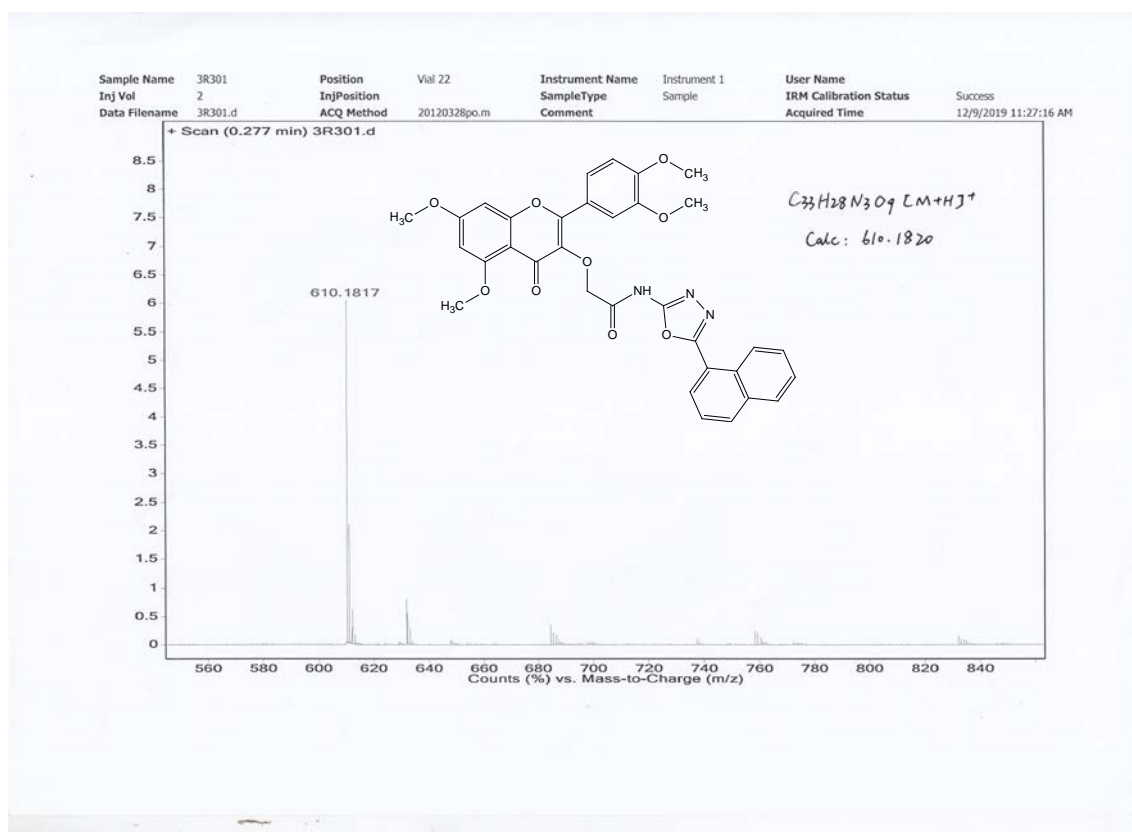

The spectrum of  $^1H$  NMR,  $^{13}C$  NMR and HRMS of compound B29

### B30

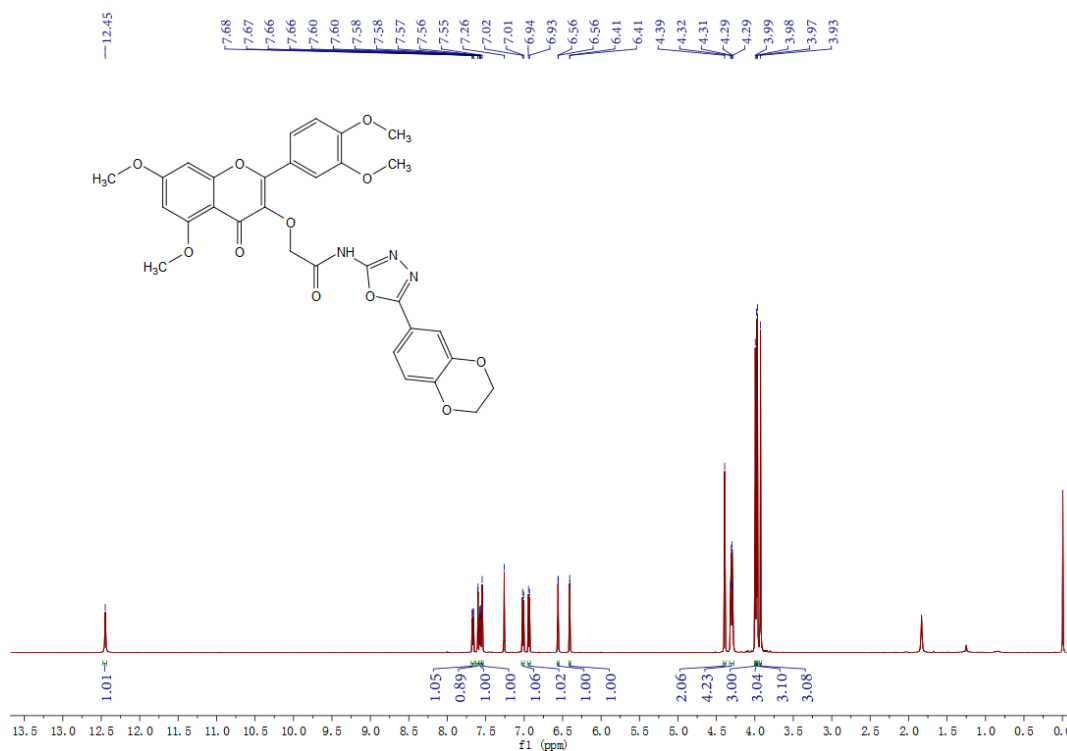

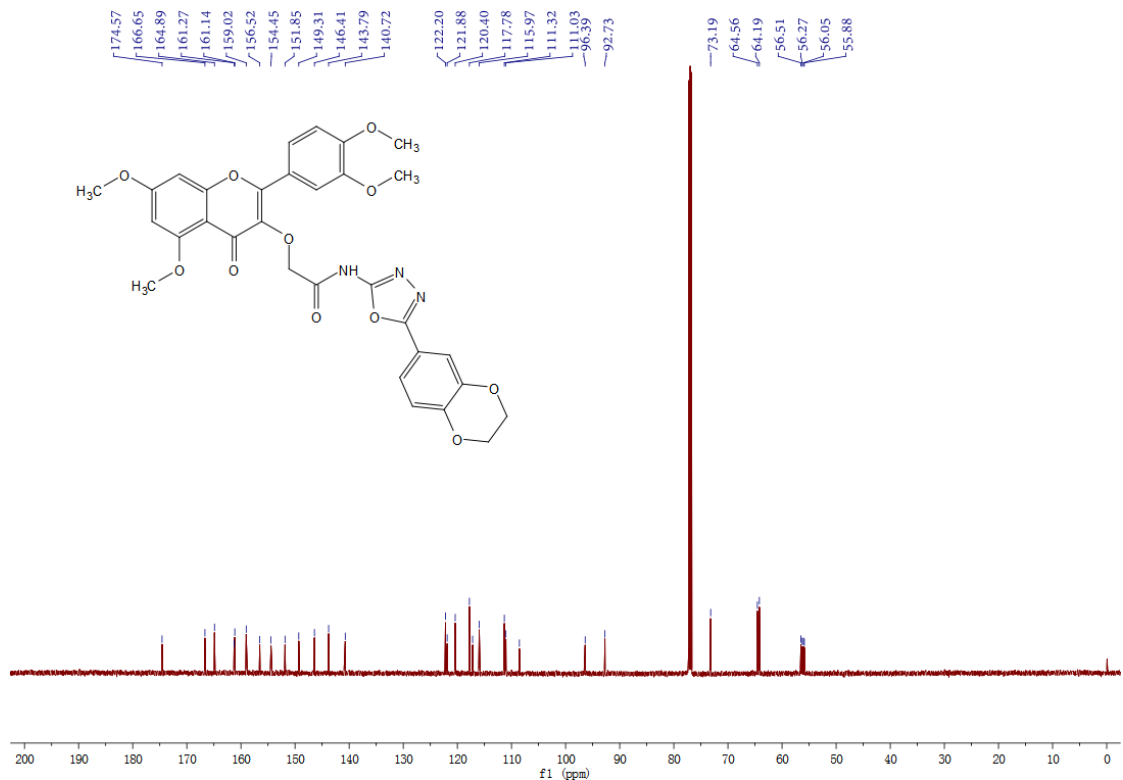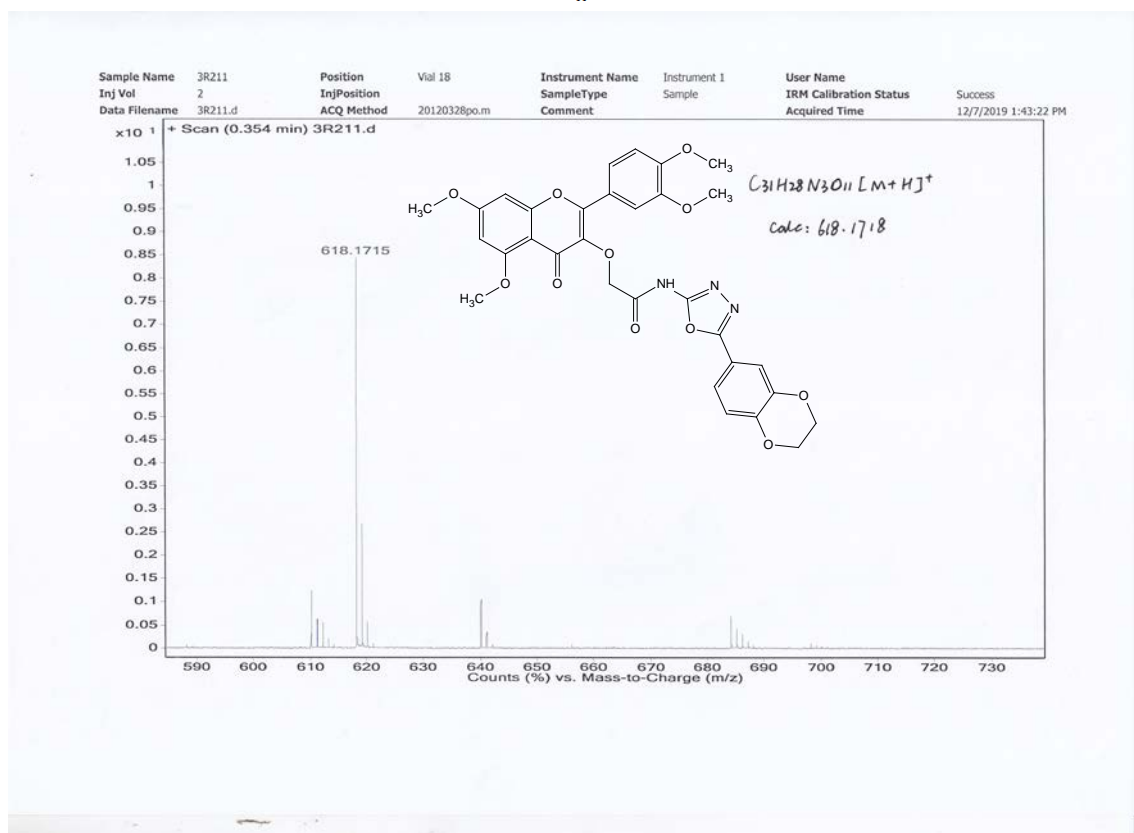

The spectrum of <sup>1</sup>H NMR, <sup>13</sup>C NMR and HRMS of compound B30



# B31

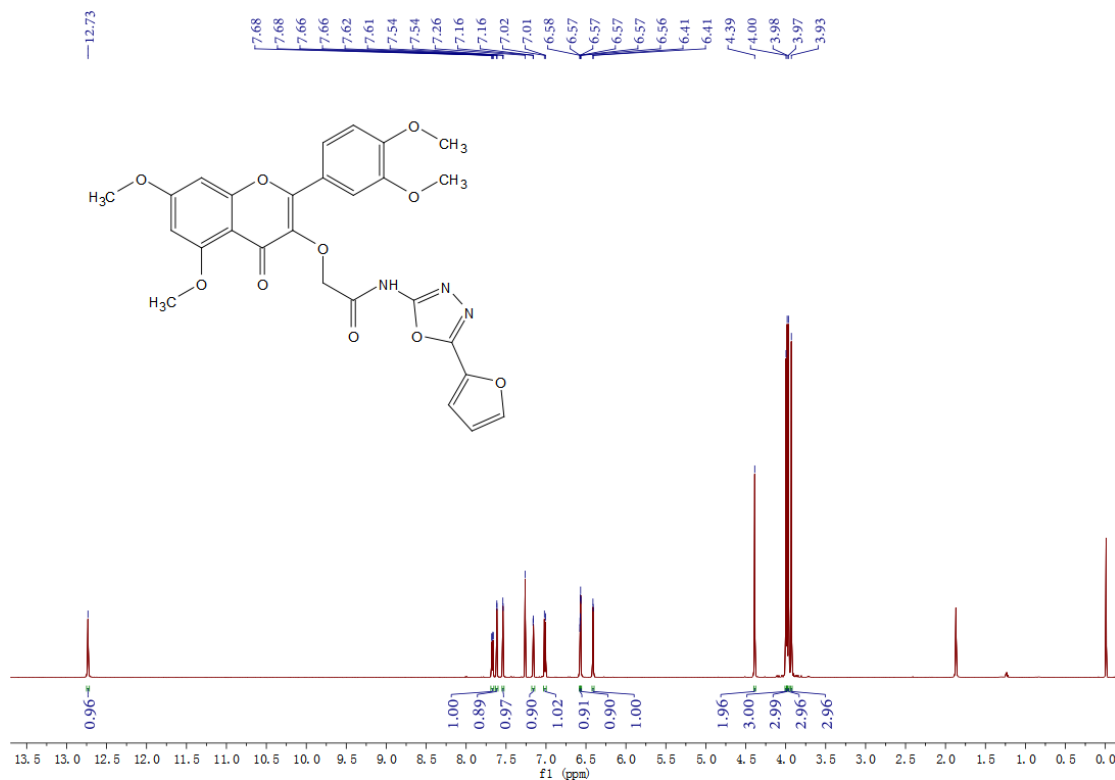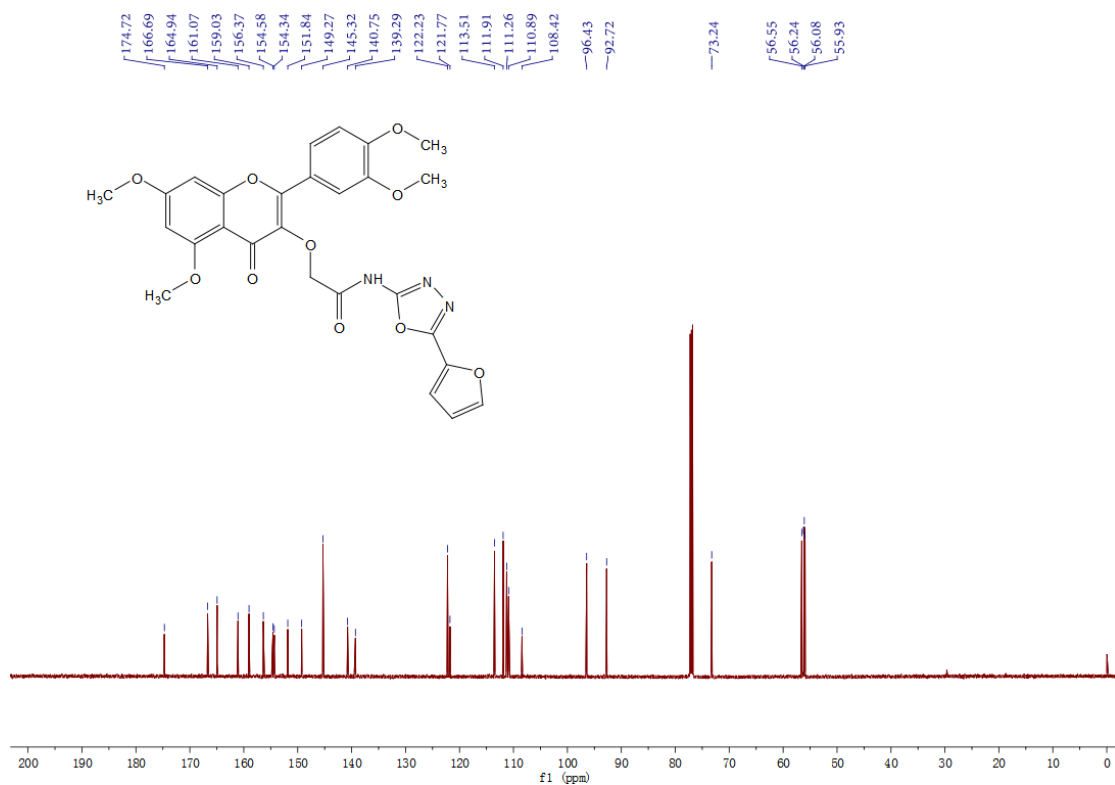

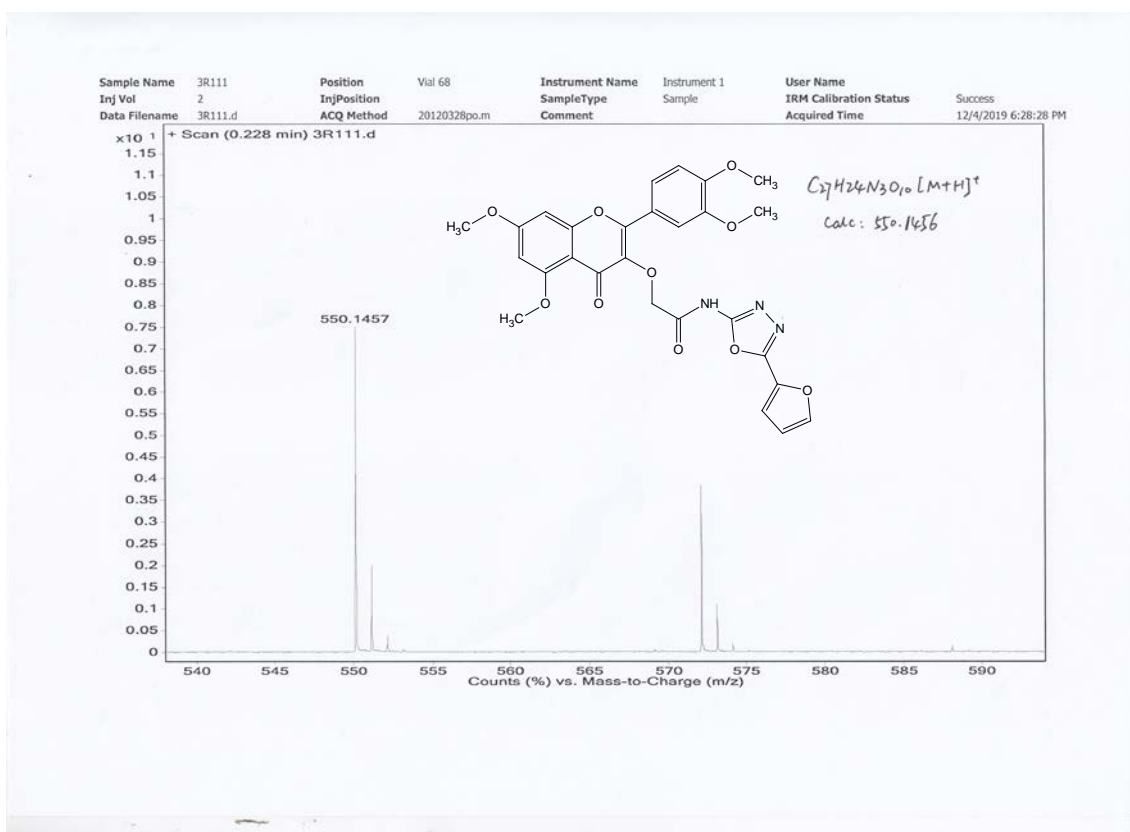

The spectrum of  $^1H$  NMR,  $^{13}C$  NMR and HRMS of compound B31

B32

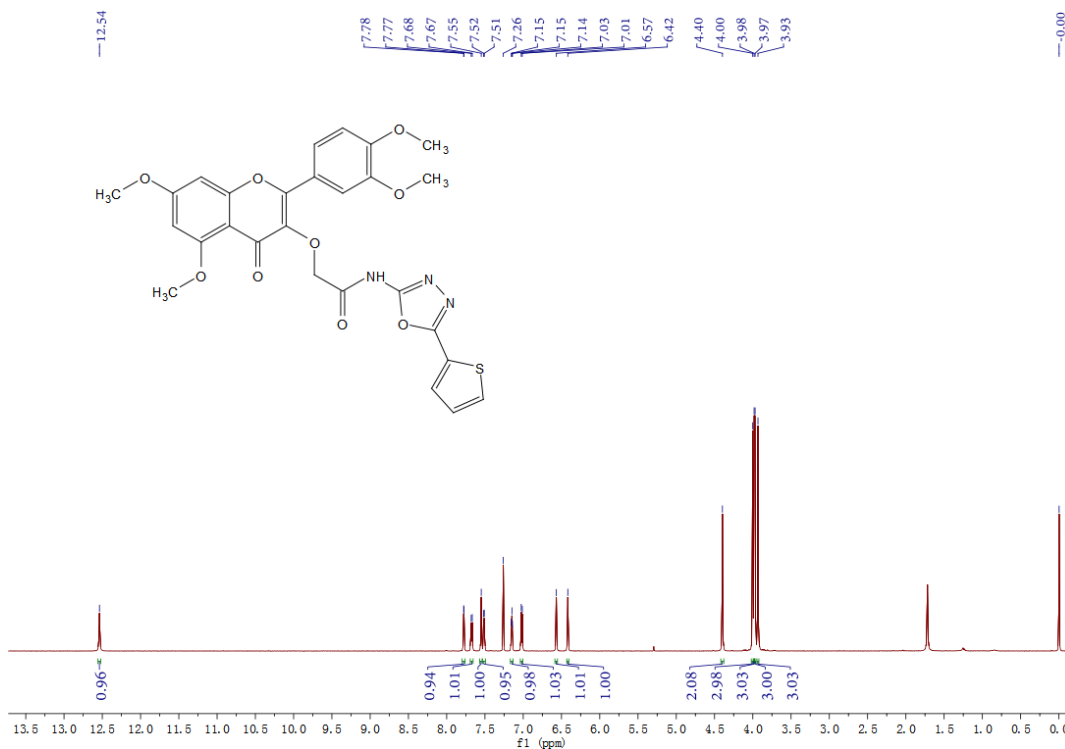

S93

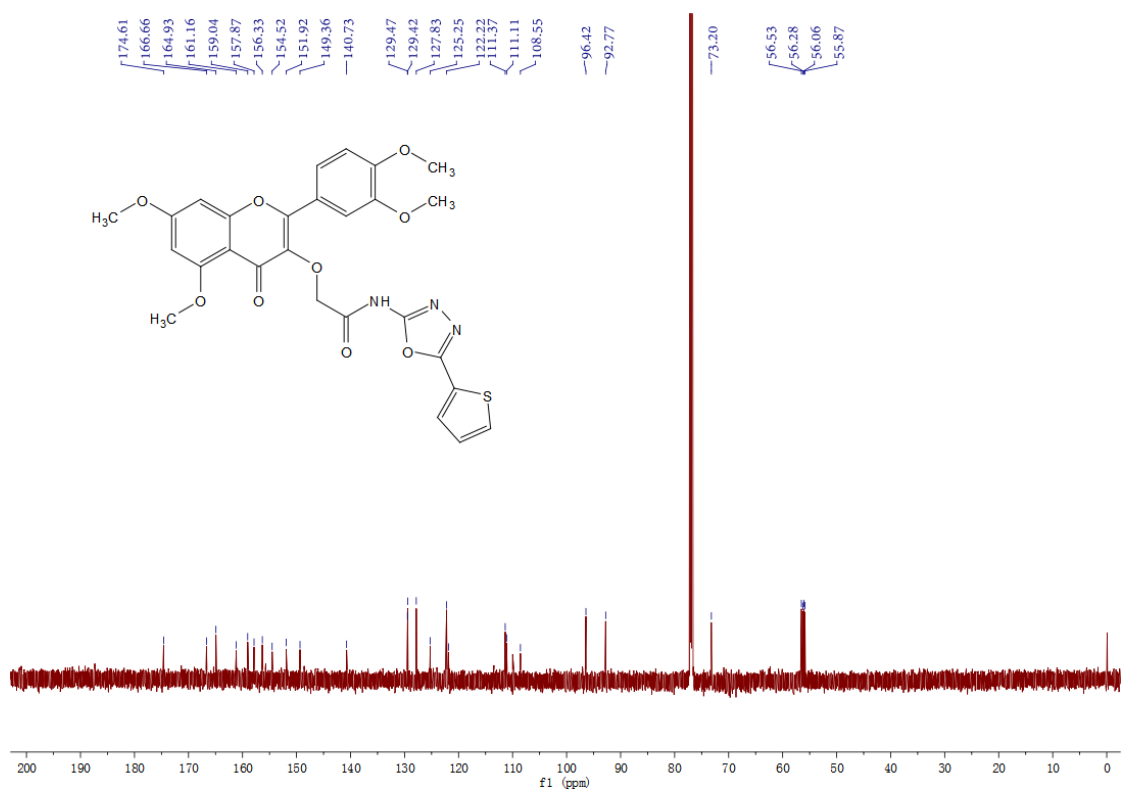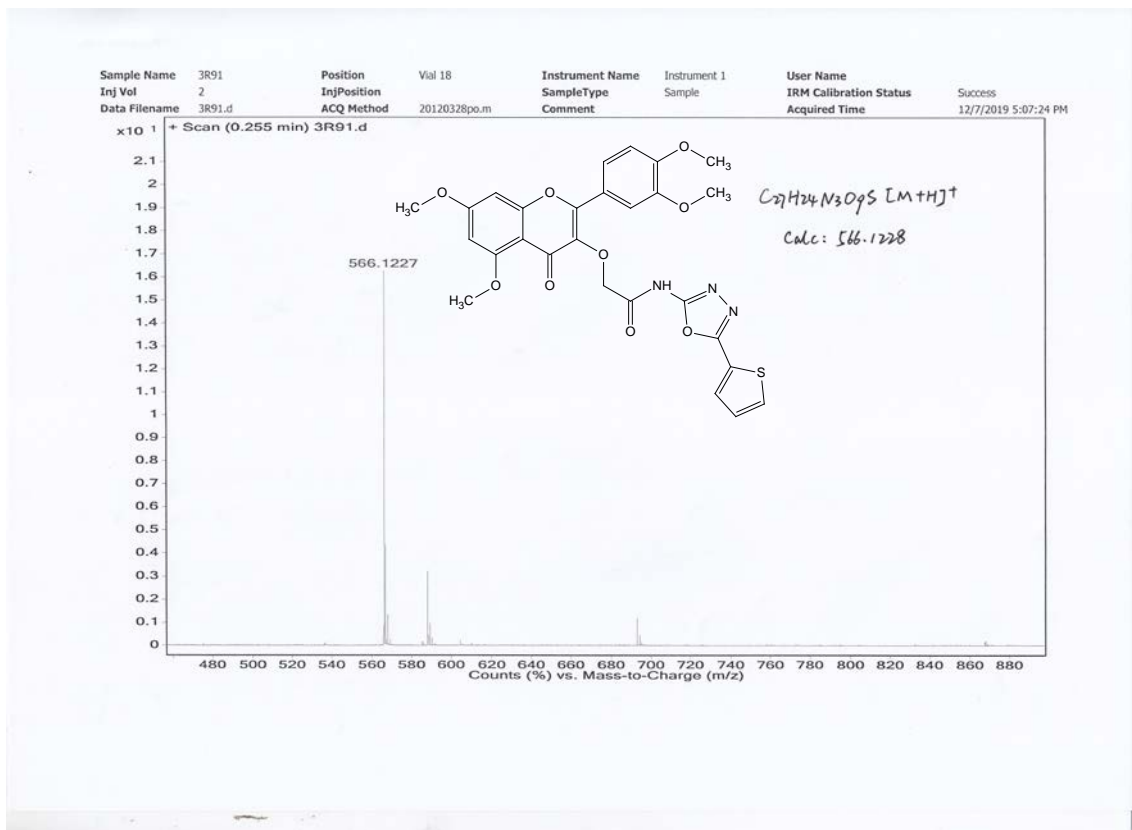

The spectrum of  $^1H$  NMR,  $^{13}C$  NMR and HRMS of compound B32

**B33**

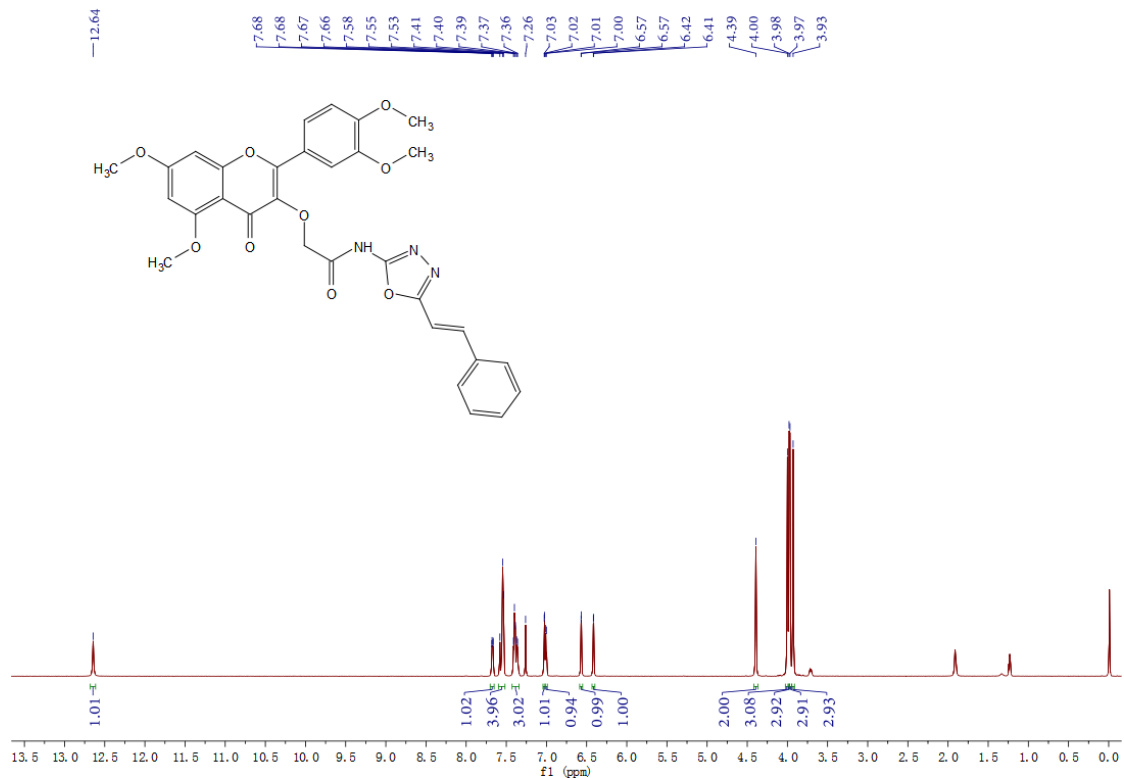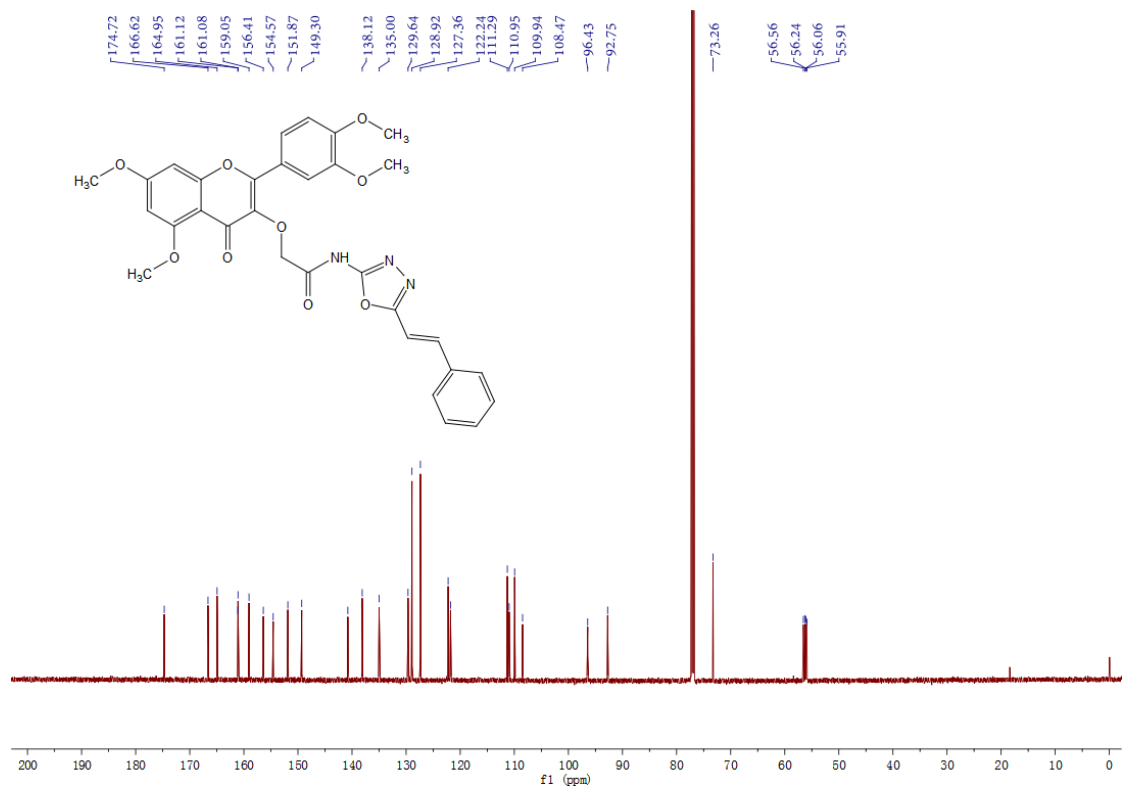

|               |         |             |              |                 |              |                        |                      |
|---------------|---------|-------------|--------------|-----------------|--------------|------------------------|----------------------|
| Sample Name   | 3R291   | Position    | Vial 13      | Instrument Name | Instrument 1 | User Name              |                      |
| Inj Vol       | 2       | InjPosition |              | SampleType      | Sample       | IRM Calibration Status | Success              |
| Data Filename | 3R291.d | ACQ Method  | 20120328po.m | Comment         |              | Acquired Time          | 12/8/2019 1:25:45 PM |

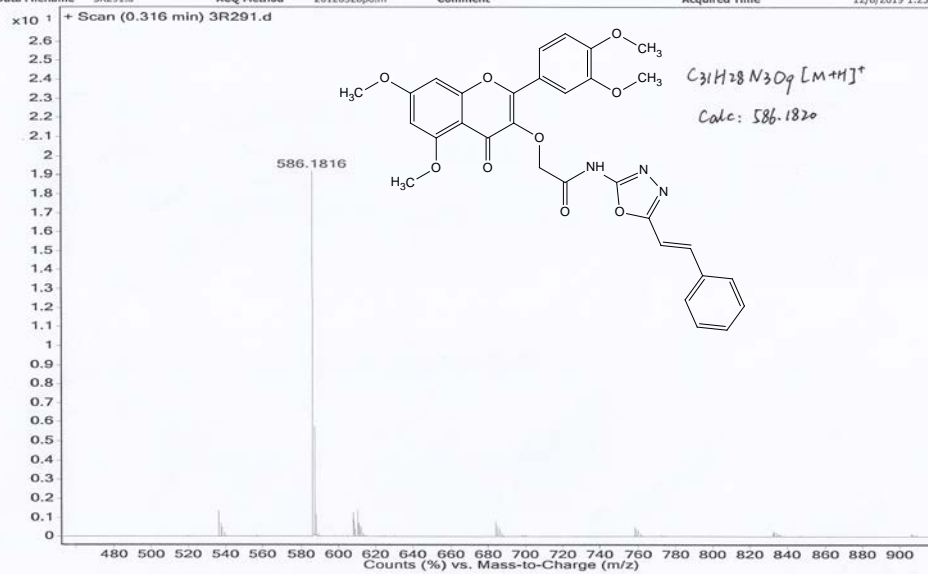

The spectrum of  $^1H$  NMR,  $^{13}C$  NMR and HRMS of compound B33

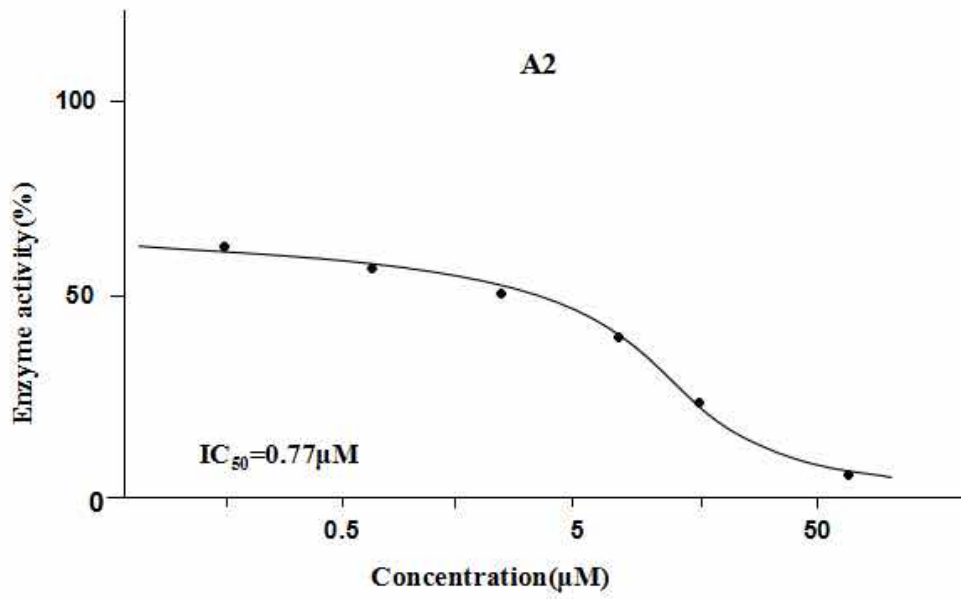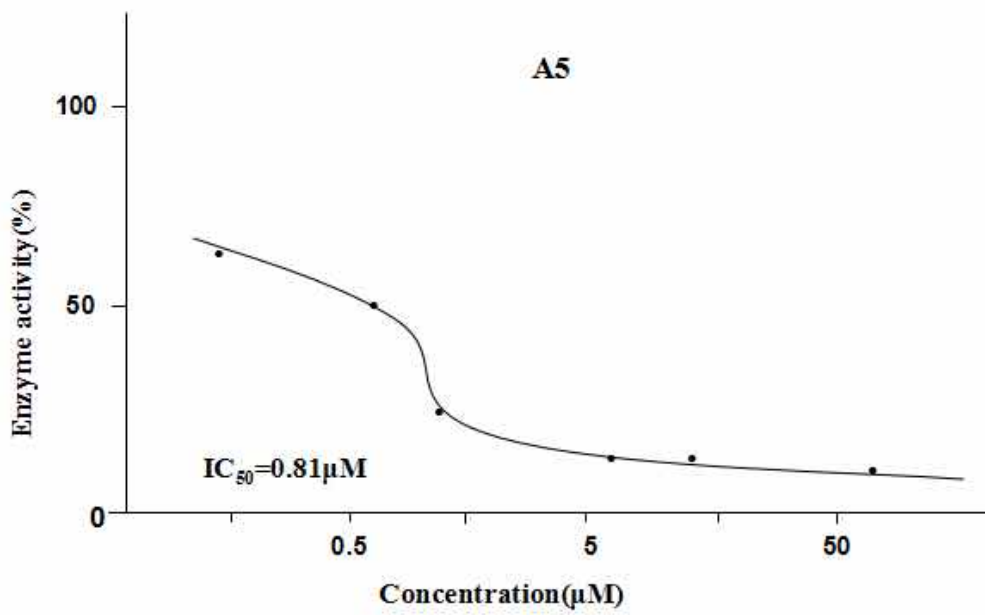

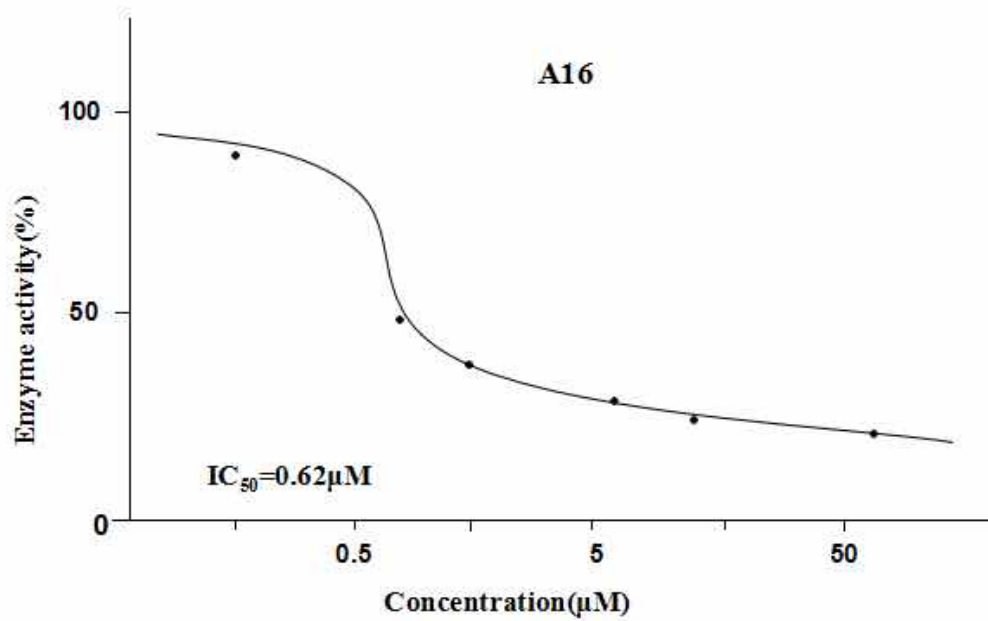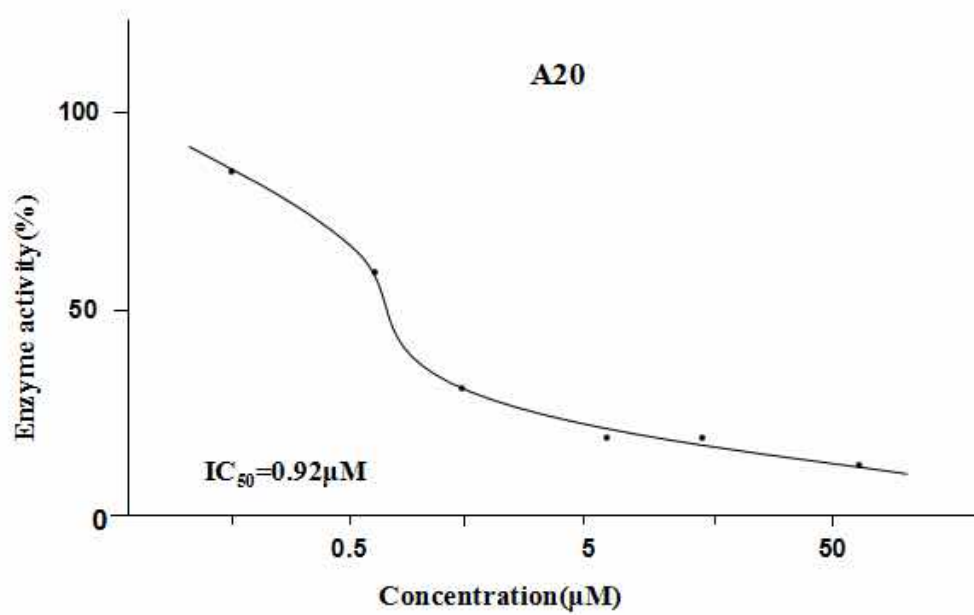

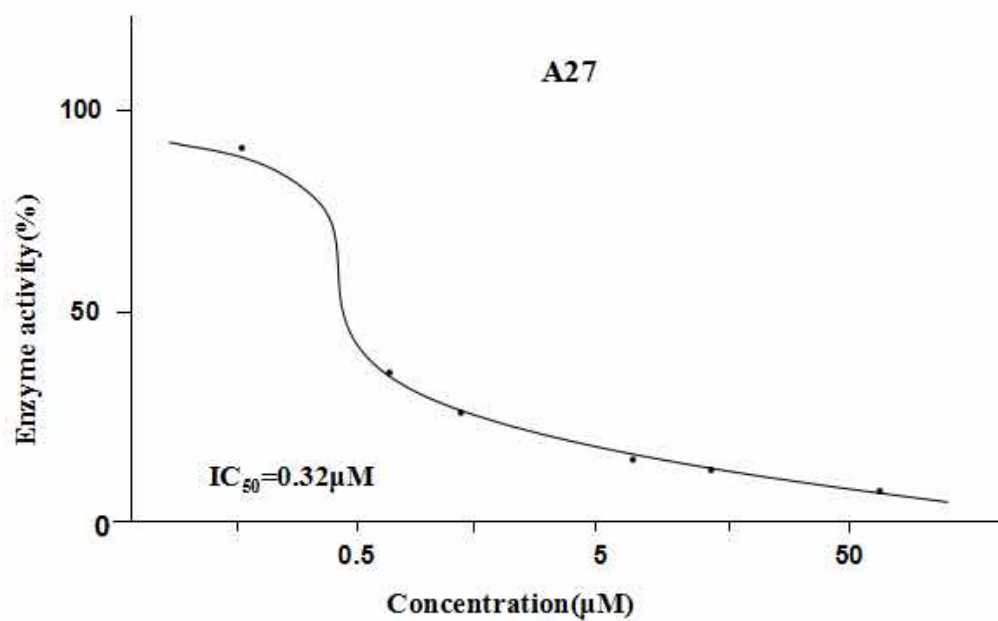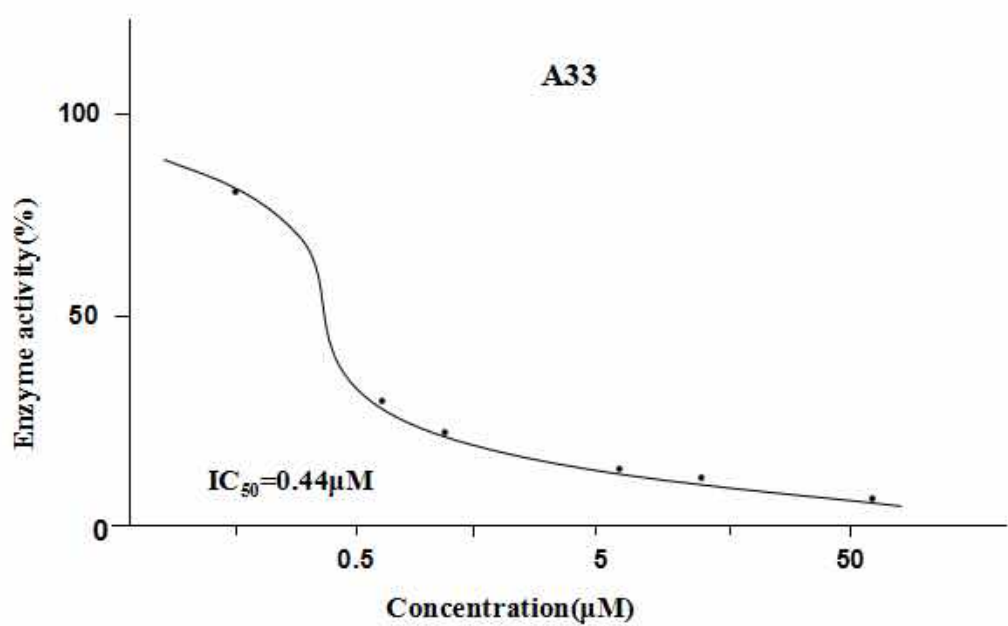



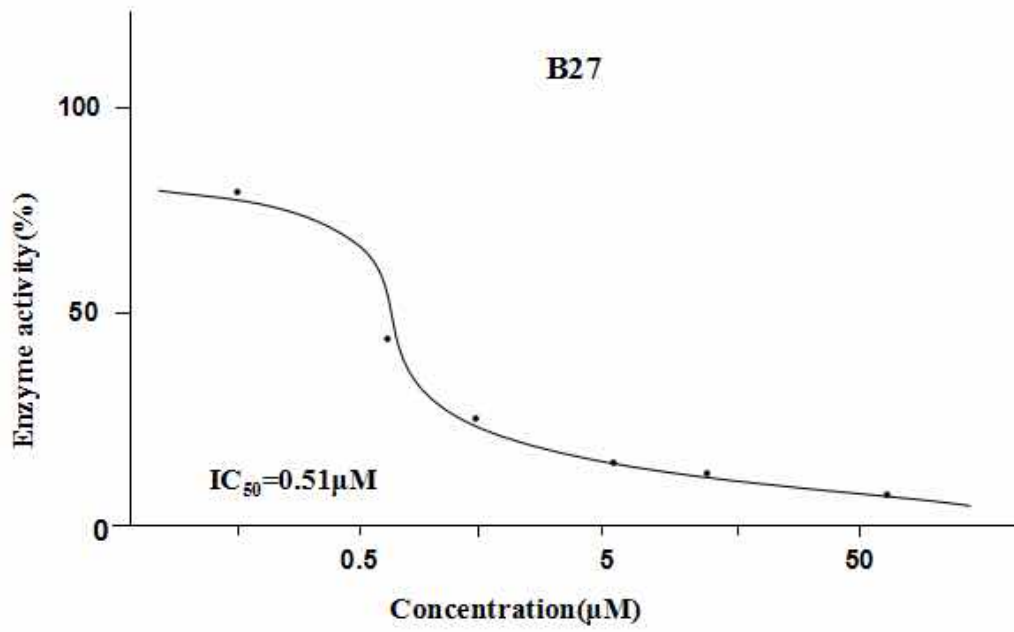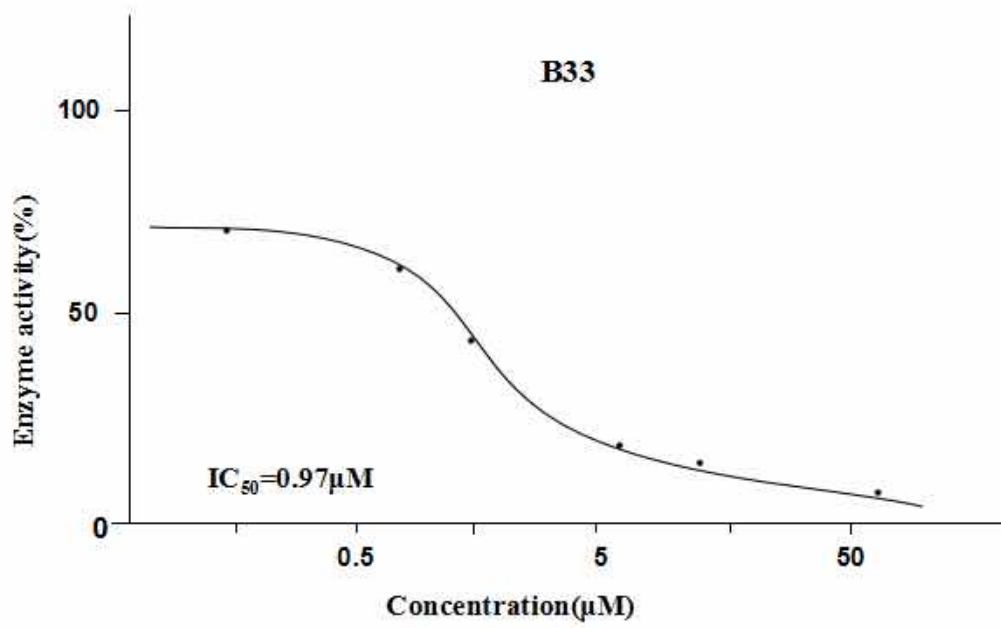

Supplement: IENZ_A_1864630_SM6611.pdf [file IENZ_A_1864630_SM6611.pdf]
